# Supplementary material for: Lipidomic analysis reveals sphingomyelin and phosphatidylcholine species associated with renal impairment and all-cause mortality in type 1 diabetes
Source: PubMed Central journal article supplement (PMC6841673; doi:10.1038/s41598-019-52916-w), 2019-11-08
Supplement: 41598_2019_52916_MOESM1_ESM.pdf [file 41598_2019_52916_MOESM1_ESM.pdf]

## Supplementary

### **Lipidomic analysis reveals sphingomyelin and phosphatidylcholine species associated with renal impairment and all-cause mortality in type 1 diabetes**

Nete Tofte<sup>1\*</sup>, Tommi Suvitaival<sup>1\*</sup>, Linda Ahonen<sup>1</sup>, Signe A. Winther<sup>1</sup>, Simone Theilade<sup>1</sup>, Marie Frimodt-Møller<sup>1</sup>, Tarunveer S. Ahluwalia<sup>1\*</sup>, Peter Rossing<sup>1,2\*</sup>

<sup>1</sup>Steno Diabetes Center Copenhagen, Gentofte, Denmark, <sup>2</sup>University of Copenhagen, Copenhagen, Denmark. \* *Equal author contributions*

#### Supplementary file including:

- Supplementary methods
- Supplementary Figure s1
- Supplementary report

## Lipidomic analyses, PROFIL:

The serum samples were prepared according to the previously published Folch procedure[1] with minor modifications. Briefly, 10  $\mu\text{L}$  of 0.9% NaCl, 92  $\mu\text{L}$  of  $\text{CHCl}_3\text{:MeOH}$  (2:1, v/v) and 28  $\mu\text{L}$  of a 10  $\mu\text{g mL}^{-1}$  working standard solution of chosen lipid standards (for quality control and data normalization purposes) were added to 10  $\mu\text{L}$  of each serum sample. The standard solution contained nine different lipid standards representing different lipid classes. The following compounds were purchased from Avanti Polar Lipids, Inc. (Alabaster, Alabama, USA): 1,2-diheptadecanoyl-*sn*-glycero-3-phosphoethanolamine (PE(17:0/17:0)), N-heptadecanoyl-D-*erythro*-sphingylphosphorylcholine (SM(d18:1/17:0)), N-heptadecanoyl-D-*erythro*-sphingosine (Cer(d18:1/17:0)), 1,2-diheptadecanoyl-*sn*-glycero-3-phosphocholine (PC(17:0/17:0)), 1-heptadecanoyl-2-hydroxy-*sn*-glycero-3-phosphocholine (LPC(17:0)) and 1-palmitoyl-d31-2-oleoyl-*sn*-glycero-3-phosphocholine (PC(16:0/d31/18:1)). Additionally, 1,2-Dimyristoyl-*sn*-glycero-3-phospho(choline-d<sub>13</sub>) (PC(14:0/d13)) was purchased from Sigma-Aldrich Denmark A/S (Copenhagen, Denmark) and Tripalmitin-1,1,1-13C3 (TG(16:0/16:0/16:0)-13C3) and Trioctanoin-1,1,1-13C3 (TG(8:0/8:0/8:0)-13C3) from Larodan (Solna, Sweden) for the same purpose. After the addition of the working standard solution of the chosen lipid standards, the samples were vortex mixed and allowed to stand on ice for 30 min. The samples were then centrifuged (9400  $\times g$ , 3 min, 4 °C), 60  $\mu\text{L}$  from the lower layer of each sample was transferred to a glass vial with an insert and 60  $\mu\text{L}$  of  $\text{CHCl}_3\text{:MeOH}$  (2:1, v/v) was added to each sample. The samples were then stored at -80 °C until analysis.

Calibration curves (at concentration levels of 100, 500, 1000, 1500, 2000 and 2500  $\text{ng mL}^{-1}$ ) for quantification of lipids were prepared using 1-hexadecyl-2-(9Z-octadecenoyl)-*sn*-glycero-3-phosphocholine (PC(16:0e/18:1(9Z))), 1-(1Z-octadecenyl)-2-(9Z-octadecenoyl)-*sn*-glycero-3-phosphocholine (PC(18:0p/18:1(9Z))), 1-octadecanoyl-*sn*-glycero-3-phosphocholine (LPC(18:0)), 1-(1Z-octadecenyl)-2-docosahexaenoyl-*sn*-glycero-3-phosphocholine (PC(18:0p/22:6)), 1-stearoyl-2-arachidonoyl-*sn*-glycero-3-phosphoinositol (PI(18:0/20:4)) and 1-stearoyl-2-linoleoyl-*sn*-glycerol (DG(18:0/18:2)) from Avanti Polar Lipids, Inc., 1-Palmitoyl-2-Hydroxy-*sn*-Glycerol-3-Phosphatidylcholine (LPC(16:0)) from Larodan, and 1,2,3-Triheptadecanoylglycerol (TG(17:0/17:0/17:0)) and 3 $\beta$ -Hydroxy-5-cholestene 3-linoleate (ChoE(18:2)), 3 $\beta$ -Hydroxy-5-cholestene 3-oleate (ChoE(18:1(9Z))), 5-Cholestene-3 $\beta$ -yl octadecenoate (ChoE(18:0)) and 5-Cholestene 3-palmitate (ChoE(16:0)) from Sigma-Aldrich.

The samples were prepared and analysed using previously published methods.[1-3] and quality control was performed throughout the data set by including blanks, pure standard samples, extracted standard samples and control plasma samples. Relative standard deviations (%RSDs) for retention times and peak areas for lipid standards representing each lipid class in the serum samples and in the control plasma samples were calculated. The %RSDs for the retention times were on below 3.8% for both the serum samples and for the control plasma samples. The %RSDs for the normalized (to PC(16:0/d30/18:1)) peak areas were within accepted analytical limits below 15.4% and 16.8% for the serum samples and for the control plasma samples, respectively. This shows that the method is reliable and repeatable throughout the sample set.

## References:

1. Folch, J., M. Lees, and G.H.S. Stanley, *A Simple Method for the Isolation and Purification of Total Lipides from Animal Tissues*. *Journal of Biological Chemistry*, 1957. **226**(1): p. 497-509.
2. O'Gorman, A., et al., *Identification of a plasma signature of psychotic disorder in children and adolescents from the Avon Longitudinal Study of Parents and Children (ALSPAC) cohort*. *Translational Psychiatry*, 2017. **7**: p. e1240.
3. Luukkonen, P.K., et al., *Impaired hepatic lipid synthesis from polyunsaturated fatty acids in TM6SF2 E167K variant carriers with NAFLD*. *Journal of Hepatology*. **67**(1): p. 128-136.

Supplementary Figure S1 Statistical analyses - flow chart

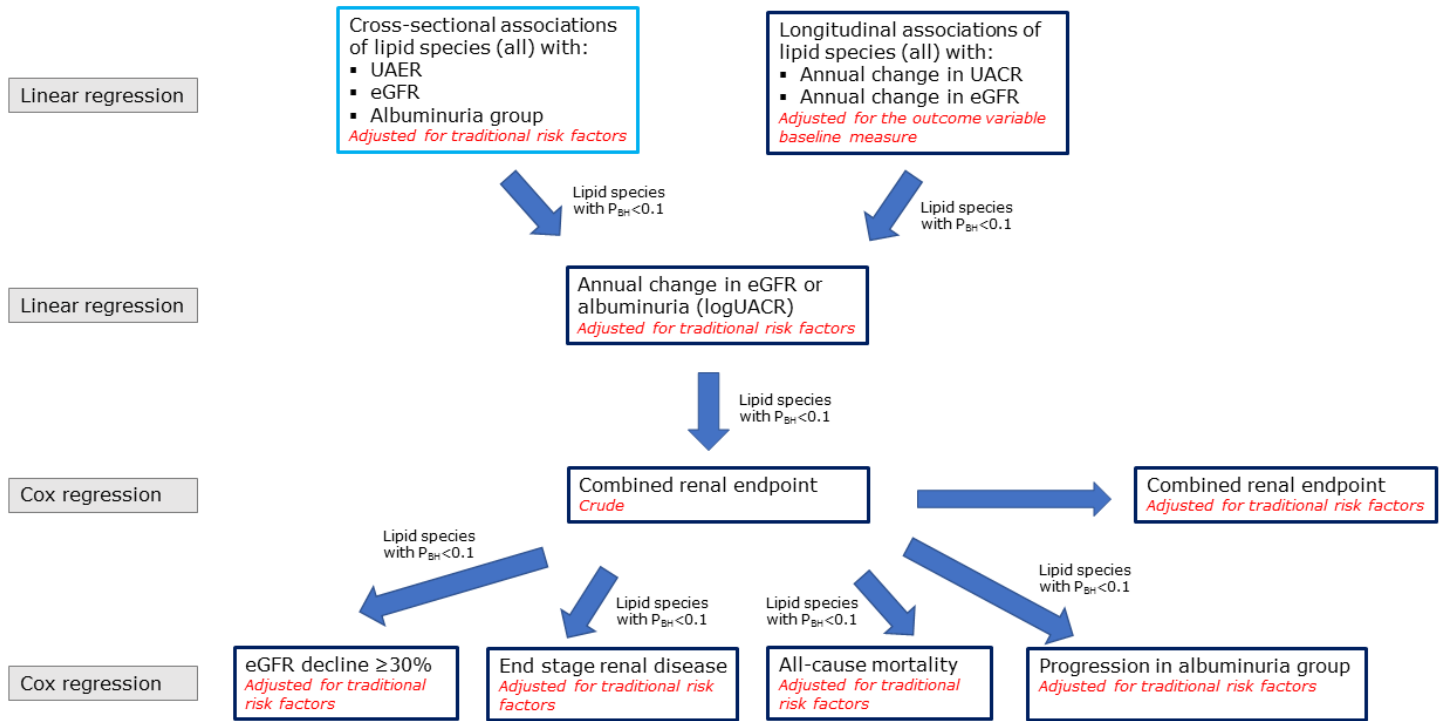

Flow chart illustrating how lipid species were tested for associations with kidney-related clinical variables and outcomes in a narrowing-down approach.  $P_{BH}$  corrected for multiple testing using the Benjamini-Hochberg method. UAER urinary albumin excretion rate, UACR urinary albumin to creatinine ratio, eGFR estimated glomerular filtration rate. Traditional risk factors included age, sex, HbA<sub>1c</sub>, systolic blood pressure, smoking, body mass index, statin treatment, p-triglycerides, total p-cholesterol and, further, eGFR or UAER, where appropriate.

# 0033\_PROFIL\_2017: Statistical Analysis of the Lipidome in Relation to Renal Complications

*Tommi Suvitaival,*  
*tommi.raimo.leo.suvitaival@regionh.dk,*  
*Steno Diabetes Center Copenhagen*

*August 12, 2019*

## Abstract

This document is Supplementary Material to the paper *Lower Serum Sphingomyelin and Phosphatidylcholine Levels Are Associated with Higher Risk of Progression to Diabetic Kidney Disease and All-Cause Mortality in Type 1 Diabetes* by Nete Tofte, Tommi Suvitaival, Linda Ahonen, Signe A. Winther, Simone Theilade, Tarun S. Ahluwalia, Marie Frimodt-Møller and Peter Rossing.

## Contents

|                                                                             |          |
|-----------------------------------------------------------------------------|----------|
| <b>1 Step 1: Lipidome-Wide Screening</b>                                    | <b>4</b> |
| 1.1 Step 1A: Cross-Sectional Analysis of All Lipids                         | 4        |
| 1.1.1 Albuminuria Groups                                                    | 4        |
| 1.1.1.1 Crude Model                                                         | 4        |
| 1.1.1.1.1 Table of Model Coefficients                                       | 5        |
| 1.1.1.1.2 Heatmaps of Model Coefficients                                    | 12       |
| 1.1.1.2 Adjusted Model                                                      | 16       |
| 1.1.1.2.1 Table                                                             | 17       |
| 1.1.1.2.2 Heatmaps                                                          | 24       |
| 1.1.2 eGFR                                                                  | 28       |
| 1.1.2.1 Crude Model                                                         | 28       |
| 1.1.2.1.1 Table                                                             | 29       |
| 1.1.2.1.2 Heatmaps                                                          | 34       |
| 1.1.2.2 Adjusted Model                                                      | 36       |
| 1.1.2.2.1 Table                                                             | 37       |
| 1.1.2.2.2 Heatmaps                                                          | 40       |
| 1.1.3 logUAER – Continuous Albuminuria                                      | 41       |
| 1.1.3.1 Crude Model                                                         | 41       |
| 1.1.3.1.1 Table                                                             | 42       |
| 1.1.3.1.2 Heatmaps                                                          | 45       |
| 1.1.3.2 Adjusted Model                                                      | 47       |
| 1.1.3.2.1 Table                                                             | 48       |
| 1.1.3.2.2 Heatmaps                                                          | 51       |
| 1.1.4 Combined Heatmaps from Adjusted Cross-sectional Analyses              | 52       |
| 1.2 Step 1B: Crude Associations of All Lipids to Clinical Changes Over Time | 54       |
| 1.2.1 eGFR Slope                                                            | 54       |
| 1.2.1.1 Table                                                               | 55       |
| 1.2.1.2 Heatmaps                                                            | 60       |
| 1.2.2 Albuminuria Slope                                                     | 62       |
| 1.2.2.1 Table                                                               | 63       |
| 1.2.2.2 Heatmaps                                                            | 68       |
| 1.3 Combined Heatmaps from Crude Models for Slopes                          | 70       |

|          |                                                                                                              |           |
|----------|--------------------------------------------------------------------------------------------------------------|-----------|
| <b>2</b> | <b>Step 2: Adjusted Associations to Clinical Changes Over Time with Prioritized Lipids from Steps 1A-B</b>   | <b>72</b> |
| 2.1      | Step 2A: Adjusted Model for Prioritized Lipids from the Adjusted Cross-Sectional Models . .                  | 72        |
| 2.1.1    | Albuminuria Slope . . . . .                                                                                  | 72        |
| 2.1.1.1  | Table . . . . .                                                                                              | 73        |
| 2.1.1.2  | Heatmaps . . . . .                                                                                           | 74        |
| 2.1.2    | eGFR Slope . . . . .                                                                                         | 75        |
| 2.1.2.1  | Table . . . . .                                                                                              | 76        |
| 2.1.2.2  | Heatmaps . . . . .                                                                                           | 77        |
| 2.2      | Step 2B: Adjusted Model for Prioritized Lipids from the Crude Models for Slopes . . . . .                    | 79        |
| 2.2.1    | eGFR Slope . . . . .                                                                                         | 79        |
| 2.2.1.1  | Table . . . . .                                                                                              | 80        |
| 2.2.1.2  | Heatmaps . . . . .                                                                                           | 81        |
| 2.2.2    | Albuminuria Slope . . . . .                                                                                  | 83        |
| 2.2.2.1  | Table . . . . .                                                                                              | 84        |
| 2.2.2.2  | Heatmaps . . . . .                                                                                           | 85        |
| <b>3</b> | <b>Step 3: Survival Analysis of Combined Renal Endpoint in Relation to Prioritized Lipids from Step 2A-B</b> | <b>87</b> |
| 3.1      | Step 3A: Crude Model . . . . .                                                                               | 87        |
| 3.1.1    | Table . . . . .                                                                                              | 88        |
| 3.1.2    | Heatmaps . . . . .                                                                                           | 89        |
| 3.1.3    | Forest Plot . . . . .                                                                                        | 91        |
| 3.2      | Step 3B: Adjusted Model . . . . .                                                                            | 92        |
| 3.2.1    | Table . . . . .                                                                                              | 93        |
| 3.2.2    | Heatmaps . . . . .                                                                                           | 94        |
| 3.2.3    | Forest Plot . . . . .                                                                                        | 96        |
| 3.3      | Combined Forest Plot from Crude and Adjusted Models . . . . .                                                | 97        |
| <b>4</b> | <b>Step 4: Survival Analysis of Specific Renal Endpoints in Relation to Prioritized Lipids from Step 3A</b>  | <b>98</b> |
| 4.1      | Step 4A: Albuminuria Group Progression . . . . .                                                             | 98        |
| 4.1.1    | Crude Model . . . . .                                                                                        | 98        |
| 4.1.1.1  | Table . . . . .                                                                                              | 99        |
| 4.1.1.2  | Heatmaps . . . . .                                                                                           | 100       |
| 4.1.1.3  | Forest Plot . . . . .                                                                                        | 102       |
| 4.1.2    | Adjusted Model . . . . .                                                                                     | 103       |
| 4.1.2.1  | Table . . . . .                                                                                              | 104       |
| 4.1.2.2  | Heatmaps . . . . .                                                                                           | 105       |
| 4.1.2.3  | Forest Plot . . . . .                                                                                        | 107       |
| 4.1.3    | Combined Forest Plot from Crude and Adjusted Models . . . . .                                                | 108       |
| 4.2      | Step 4B: All-Cause Mortality . . . . .                                                                       | 109       |
| 4.2.1    | Crude Model . . . . .                                                                                        | 109       |
| 4.2.1.1  | Table . . . . .                                                                                              | 110       |
| 4.2.1.2  | Heatmaps . . . . .                                                                                           | 111       |
| 4.2.1.3  | Forest Plot . . . . .                                                                                        | 113       |
| 4.2.2    | Adjusted Model . . . . .                                                                                     | 114       |
| 4.2.2.1  | Table . . . . .                                                                                              | 115       |
| 4.2.2.2  | Heatmaps . . . . .                                                                                           | 116       |
| 4.2.2.3  | Forest Plot . . . . .                                                                                        | 118       |
| 4.2.3    | Combined Forest Plot . . . . .                                                                               | 119       |
| 4.3      | Step 4C: eGFR Decline > 30 % . . . . .                                                                       | 120       |
| 4.3.1    | Crude Model . . . . .                                                                                        | 120       |
| 4.3.1.1  | Table . . . . .                                                                                              | 121       |

|           |                                                                                        |            |
|-----------|----------------------------------------------------------------------------------------|------------|
| 4.3.1.2   | Heatmaps . . . . .                                                                     | 122        |
| 4.3.1.3   | Forest Plot . . . . .                                                                  | 124        |
| 4.3.2     | Adjusted Model . . . . .                                                               | 125        |
| 4.3.2.1   | Table . . . . .                                                                        | 126        |
| 4.3.2.2   | Heatmaps . . . . .                                                                     | 126        |
| 4.3.2.3   | Forest Plot . . . . .                                                                  | 128        |
| 4.3.3     | Combined Forest Plot from Crude and Adjusted Models . . . . .                          | 129        |
| 4.4       | Step 4D: End-Stage Renal Disease . . . . .                                             | 130        |
| 4.4.1     | Crude Model . . . . .                                                                  | 130        |
| 4.4.1.1   | Table . . . . .                                                                        | 131        |
| 4.4.1.2   | Heatmaps . . . . .                                                                     | 132        |
| 4.4.1.3   | Forest Plot . . . . .                                                                  | 134        |
| 4.4.2     | Adjusted Model . . . . .                                                               | 135        |
| 4.4.2.1   | Table . . . . .                                                                        | 136        |
| 4.4.2.2   | Heatmaps . . . . .                                                                     | 136        |
| 4.4.2.3   | Forest Plot . . . . .                                                                  | 138        |
| 4.4.3     | Combined Forest Plot from Crude and Adjusted Models . . . . .                          | 139        |
| 4.5       | Compilation Forest Plot from Steps 4A-D . . . . .                                      | 140        |
| <b>5</b>  | <b>Step 5: Detailed Assessment of the Top-Lipid in Relation to All-Cause Mortality</b> | <b>141</b> |
| 5.1       | Step 5A: Analysis of Full Cohort . . . . .                                             | 141        |
| 5.1.1     | Survival Model with Details . . . . .                                                  | 141        |
| 5.1.1.1   | Forest Plot with Clinical Variables . . . . .                                          | 142        |
| 5.1.1.2   | Diagnostics of the Survival Model . . . . .                                            | 143        |
| 5.1.1.3   | Kaplan-Maier Curve with Median Cutpoint . . . . .                                      | 145        |
| 5.1.2     | Other Model Fits . . . . .                                                             | 147        |
| 5.2       | Step 5B: Analysis of an Age-and-Sex-Matched Subcohort . . . . .                        | 149        |
| 5.2.1     | Survival Model with Details . . . . .                                                  | 152        |
| 5.2.1.1   | Forest Plot with Clinical Variables . . . . .                                          | 153        |
| 5.2.1.2   | Diagnostics of the Survival Model . . . . .                                            | 154        |
| 5.2.1.3   | Kaplan-Maier Curve with Median Cutpoint . . . . .                                      | 156        |
| 5.2.2     | Other Model Fits . . . . .                                                             | 158        |
| <b>6</b>  | <b>Correlation Matrix</b>                                                              | <b>160</b> |
| <b>7</b>  | <b>Boxplots</b>                                                                        | <b>162</b> |
| 7.1       | Entire Cohort . . . . .                                                                | 162        |
| 7.2       | Age-and-Sex-Matched Subcohort . . . . .                                                | 167        |
| <b>8</b>  | <b>Lipids' Proportion of the Total Amount of Lipid Class</b>                           | <b>173</b> |
| <b>9</b>  | <b>Quality Control Table of Lipid Measurements</b>                                     | <b>176</b> |
| <b>10</b> | <b>Appendix</b>                                                                        | <b>179</b> |

# 1 Step 1: Lipidome-Wide Screening

## 1.1 Step 1A: Cross-Sectional Analysis of All Lipids

### 1.1.1 Albuminuria Groups

#### 1.1.1.1 Crude Model



### 1.1.1.1.1 Table of Model Coefficients

```

##
##
## Table: Coefficients for GroupT1D Micro
## Results of the crude model for albuminuria group variable.
## Shown in the table are name of the lipid (Name),
## model coefficient (Coefficient),
## its lower and upper confidence intervals (CI.L, CL.R),
## average value of the variable (AveExpr),
## p-value of the coefficient (P.Value) and
## the p-value after correction for multiple testing (adj.P.Val).
## The rows of the table are shown in an increasing order by the respective p-value.
##
## Name                Coefficient      CI.L      CI.R      AveExpr      P.Value      adj.P.Val
## -----
## LPC(18:2)           -0.21600      -0.3290   -0.10300   24.0         0.000193    0.0205
## SM(d18:1/24:0)     -0.11100      -0.1900   -0.03330   23.6         0.005250    0.2690
## SM(d40:1)          -0.10100      -0.1750   -0.02680   24.0         0.007620    0.2690
## SM(d41:1)          -0.11300      -0.2000   -0.02590   22.7         0.011100    0.2930
## PC(0-36:3)         -0.12200      -0.2220   -0.02250   20.4         0.016400    0.3240
## PC(0-34:3)         -0.11100      -0.2040   -0.01680   21.9         0.020900    0.3240
## PC(0-36:2)         -0.10600      -0.1960   -0.01570   20.5         0.021400    0.3240
## LPC(18:0)          -0.07150      -0.1390   -0.00353   24.0         0.039200    0.5200
## PC(0-34:2)         -0.11200      -0.2280   0.00426    21.5         0.059000    0.6880
## PC(16:0e/18:1(9Z) -0.07300      -0.1520   0.00622    21.8         0.070900    0.6880
## LPC(18:1)          -0.07860      -0.1650   0.00734    23.7         0.073000    0.6880
## PC(34:2)           0.12400       -0.0139   0.26300    26.0         0.077900    0.6880
## LPC(16:0)          -0.03320      -0.0714   0.00498    25.3         0.088200    0.7190
## PC(0-38:5)         -0.06050      -0.1330   0.01200    22.7         0.102000    0.7530
## PC(37:2)           -0.09810      -0.2170   0.02110    19.3         0.107000    0.7530
## SM(d38:1)          -0.05430      -0.1240   0.01540    23.1         0.127000    0.7740
## PC(0-38:4)         -0.07400      -0.1700   0.02170    21.7         0.129000    0.7740
## TG(18:1/18:1/18:1) -0.09750      -0.2250   0.02980    24.8         0.133000    0.7740
## SM(d39:1)          -0.07570      -0.1770   0.02570    21.1         0.143000    0.7740
## TG(48:3)           0.17700       -0.0646   0.41800    20.6         0.151000    0.7740
## PC(0-38:6)         -0.05660      -0.1350   0.02200    20.4         0.158000    0.7740
## TG(54:4)           -0.08030      -0.1950   0.03450    21.4         0.170000    0.7740
## PC(0-36:4)         -0.05940      -0.1450   0.02580    22.9         0.171000    0.7740
## TG(45:0)           -0.04070      -0.0996   0.01820    23.1         0.175000    0.7740
## PC(36:2)           -0.03870      -0.0971   0.01970    26.1         0.194000    0.8230
## TG(54:5)           -0.08890      -0.2300   0.05180    20.6         0.215000    0.8500
## TG(18:1/18:2/18:2) -0.09800      -0.2630   0.06700    23.6         0.244000    0.8500
## TG(18:2/18:1/16:0) -0.05250      -0.1430   0.03760    25.3         0.253000    0.8500
## SM(d38:2)          -0.04320      -0.1180   0.03160    21.3         0.257000    0.8500
## PC(0-36:5)         -0.04430      -0.1250   0.03620    22.3         0.280000    0.8500
## TG(18:2/18:1/18:1) -0.07270      -0.2070   0.06130    24.4         0.287000    0.8500
## TG(18:0/18:1/20:4) 0.10400       -0.0883   0.29600    21.3         0.289000    0.8500
## TG(50:2)           0.06080       -0.0517   0.17300    21.2         0.289000    0.8500
## TG(47:1)           -0.07790      -0.2230   0.06750    19.6         0.293000    0.8500
## TG(54:6)           0.10000       -0.0874   0.28700    19.5         0.295000    0.8500
## TG(18:1/12:0/18:1) 0.09550       -0.0836   0.27500    22.5         0.296000    0.8500
## TG(46:1)           0.09600       -0.0845   0.27600    21.3         0.297000    0.8500
## SM(d36:1)          -0.03080      -0.0921   0.03040    23.4         0.323000    0.8760

```

|                       |          |         |         |      |          |        |
|-----------------------|----------|---------|---------|------|----------|--------|
| ## TG(14:0/18:1/18:1) | 0.06810  | -0.0683 | 0.20500 | 24.4 | 0.327000 | 0.8760 |
| ## TG(18:1/18:1/16:0) | -0.04900 | -0.1510 | 0.05280 | 25.6 | 0.345000 | 0.8760 |
| ## PC(38:6)           | -0.03460 | -0.1080 | 0.03900 | 25.3 | 0.357000 | 0.8760 |
| ## TG(46:2)           | 0.08830  | -0.1060 | 0.28200 | 20.1 | 0.372000 | 0.8760 |
| ## TG(18:2/18:2/18:2) | 0.08330  | -0.1000 | 0.26600 | 22.1 | 0.373000 | 0.8760 |
| ## LPC(20:4)          | -0.04990 | -0.1610 | 0.06120 | 21.4 | 0.379000 | 0.8760 |
| ## PC(38:5)           | -0.02340 | -0.0755 | 0.02880 | 24.5 | 0.379000 | 0.8760 |
| ## TG(54:3)           | -0.04420 | -0.1440 | 0.05510 | 21.7 | 0.383000 | 0.8760 |
| ## SM(d41:2)          | -0.03550 | -0.1170 | 0.04630 | 22.5 | 0.394000 | 0.8760 |
| ## SM(d32:1)          | 0.03230  | -0.0432 | 0.10800 | 22.3 | 0.401000 | 0.8760 |
| ## PC(36:4)           | -0.01950 | -0.0653 | 0.02640 | 26.0 | 0.405000 | 0.8760 |
| ## PC(35:2)           | -0.03880 | -0.1350 | 0.05710 | 21.8 | 0.427000 | 0.9050 |
| ## PC(34:1)           | 0.02720  | -0.0412 | 0.09560 | 25.9 | 0.436000 | 0.9050 |
| ## PC(40:7)           | -0.04130 | -0.1490 | 0.06640 | 21.4 | 0.451000 | 0.9200 |
| ## SM(d33:1)          | -0.02810 | -0.1060 | 0.04970 | 21.3 | 0.479000 | 0.9340 |
| ## PC(34:3)           | -0.05330 | -0.2030 | 0.09630 | 22.5 | 0.484000 | 0.9340 |
| ## TG(18:2/22:5/16:0) | 0.08070  | -0.1490 | 0.31000 | 22.1 | 0.490000 | 0.9340 |
| ## PC(38:2)           | -0.02810 | -0.1090 | 0.05250 | 21.3 | 0.493000 | 0.9340 |
| ## TG(14:0/16:0/18:1) | 0.06120  | -0.1210 | 0.24300 | 22.8 | 0.509000 | 0.9350 |
| ## SM(d40:2)          | -0.02120 | -0.0868 | 0.04440 | 23.7 | 0.527000 | 0.9350 |
| ## TG(56:6)           | 0.03590  | -0.0785 | 0.15000 | 19.9 | 0.538000 | 0.9350 |
| ## TG(16:0/18:2/18:3) | -0.07270 | -0.3060 | 0.16000 | 22.0 | 0.541000 | 0.9350 |
| ## PC(35:1)           | -0.02740 | -0.1170 | 0.06240 | 21.8 | 0.549000 | 0.9350 |
| ## PC(36:5)           | 0.04910  | -0.1200 | 0.21800 | 24.3 | 0.569000 | 0.9350 |
| ## TG(56:4)           | -0.05560 | -0.2470 | 0.13600 | 20.0 | 0.569000 | 0.9350 |
| ## TG(52:3)           | -0.02200 | -0.1010 | 0.05680 | 22.3 | 0.584000 | 0.9350 |
| ## TG(16:0/18:2/18:2) | -0.04320 | -0.2010 | 0.11500 | 24.5 | 0.591000 | 0.9350 |
| ## PC(40:6)           | -0.02820 | -0.1390 | 0.08290 | 23.9 | 0.619000 | 0.9350 |
| ## TG(50:1)           | 0.04450  | -0.1320 | 0.22100 | 24.3 | 0.621000 | 0.9350 |
| ## SM(d34:1)          | 0.00817  | -0.0258 | 0.04210 | 24.9 | 0.637000 | 0.9350 |
| ## PC(32:1)           | 0.03550  | -0.1130 | 0.18400 | 23.3 | 0.638000 | 0.9350 |
| ## TG(53:4)           | -0.04010 | -0.2210 | 0.14100 | 19.7 | 0.663000 | 0.9350 |
| ## TG(50:3)           | 0.03260  | -0.1140 | 0.17900 | 23.5 | 0.664000 | 0.9350 |
| ## PC(32:2)           | -0.02900 | -0.1630 | 0.10500 | 20.8 | 0.671000 | 0.9350 |
| ## TG(56:7)           | 0.02750  | -0.1020 | 0.15700 | 19.6 | 0.677000 | 0.9350 |
| ## PC(36:3)           | -0.01720 | -0.0983 | 0.06400 | 25.6 | 0.678000 | 0.9350 |
| ## SM(42:2)           | -0.01200 | -0.0710 | 0.04690 | 25.2 | 0.688000 | 0.9350 |
| ## PC(40:5)           | -0.01920 | -0.1180 | 0.07950 | 22.0 | 0.703000 | 0.9350 |
| ## PC(32:0)           | -0.01000 | -0.0619 | 0.04180 | 22.5 | 0.704000 | 0.9350 |
| ## TG(58:9)           | 0.05100  | -0.2160 | 0.31800 | 19.9 | 0.708000 | 0.9350 |
| ## PC(33:1)           | -0.01950 | -0.1240 | 0.08520 | 20.9 | 0.715000 | 0.9350 |
| ## TG(46:0)           | 0.03130  | -0.1410 | 0.20300 | 20.4 | 0.721000 | 0.9350 |
| ## TG(52:4)           | -0.02130 | -0.1390 | 0.09660 | 21.7 | 0.723000 | 0.9350 |
| ## TG(49:3)           | -0.00361 | -0.0239 | 0.01670 | 20.7 | 0.727000 | 0.9350 |
| ## PC(38:3)           | -0.01550 | -0.1040 | 0.07310 | 24.0 | 0.732000 | 0.9350 |
| ## TG(53:3)           | -0.02780 | -0.1940 | 0.13800 | 20.7 | 0.742000 | 0.9360 |
| ## TG(54:2)           | -0.02610 | -0.1910 | 0.13900 | 23.4 | 0.757000 | 0.9370 |
| ## SM(d16:1/18:1)     | -0.01070 | -0.0798 | 0.05830 | 22.8 | 0.760000 | 0.9370 |
| ## TG(49:2)           | 0.01520  | -0.1080 | 0.13900 | 20.4 | 0.809000 | 0.9710 |
| ## TG(18:1/18:1/22:6) | 0.02830  | -0.2420 | 0.29900 | 20.7 | 0.837000 | 0.9710 |
| ## SM(d18:2/24:1)     | 0.00707  | -0.0609 | 0.07510 | 24.0 | 0.838000 | 0.9710 |
| ## TG(16:0/18:2/22:6) | 0.02900  | -0.2700 | 0.32800 | 21.0 | 0.849000 | 0.9710 |
| ## TG(56:5)           | -0.01350 | -0.1590 | 0.13200 | 20.3 | 0.856000 | 0.9710 |
| ## TG(51:2)           | 0.01390  | -0.1460 | 0.17400 | 21.6 | 0.865000 | 0.9710 |

|                       |          |         |         |      |          |        |
|-----------------------|----------|---------|---------|------|----------|--------|
| ## TG(14:0/18:2/18:2) | 0.01550  | -0.1960 | 0.22700 | 21.2 | 0.885000 | 0.9710 |
| ## TG(56:3)           | 0.01110  | -0.1550 | 0.17700 | 19.9 | 0.896000 | 0.9710 |
| ## TG(49:1)           | 0.00811  | -0.1300 | 0.14600 | 20.9 | 0.908000 | 0.9710 |
| ## SM(d36:2)          | -0.00347 | -0.0695 | 0.06250 | 21.4 | 0.918000 | 0.9710 |
| ## TG(52:5)           | -0.00992 | -0.2010 | 0.18100 | 19.8 | 0.919000 | 0.9710 |
| ## TG(50:0)           | -0.00995 | -0.2160 | 0.19600 | 20.8 | 0.924000 | 0.9710 |
| ## TG(53:2)           | -0.00738 | -0.1850 | 0.17000 | 20.7 | 0.935000 | 0.9710 |
| ## LPC(16:1)          | -0.00448 | -0.1140 | 0.10500 | 20.0 | 0.936000 | 0.9710 |
| ## TG(51:1)           | -0.00610 | -0.1800 | 0.16800 | 20.3 | 0.945000 | 0.9710 |
| ## TG(16:0/18:0/18:1) | -0.00714 | -0.2310 | 0.21700 | 23.1 | 0.950000 | 0.9710 |
| ## TG(51:3)           | -0.00517 | -0.1690 | 0.15900 | 20.7 | 0.951000 | 0.9710 |
| ## TG(16:0/22:5/18:1) | 0.00424  | -0.1360 | 0.14500 | 22.7 | 0.953000 | 0.9710 |
| ## PC(38:4)           | -0.00123 | -0.0575 | 0.05500 | 25.2 | 0.966000 | 0.9720 |
| ## TG(52:2)           | -0.00133 | -0.0757 | 0.07310 | 22.6 | 0.972000 | 0.9720 |

##

##

## Table: Coefficients for GroupT1D Macro

## Results of the crude model for albuminuria group variable.

## Shown in the table are name of the lipid (Name),

## model coefficient (Coefficient),

## its lower and upper confidence intervals (CI.L, CL.R),

## average value of the variable (AveExpr),

## p-value of the coefficient (P.Value) and

## the p-value after correction for multiple testing (adj.P.Val).

## The rows of the table are shown in an increasing order by the respective p-value.

##

| ## Name               | Coefficient | CI.L     | CI.R     | AveExpr | P.Value  | adj.P.Val |
|-----------------------|-------------|----------|----------|---------|----------|-----------|
| ## PC(0-34:3)         | -0.26200    | -0.35200 | -0.17300 | 21.9    | 0.00e+00 | 1.50e-06  |
| ## SM(d18:1/24:0)     | -0.18100    | -0.25600 | -0.10600 | 23.6    | 2.50e-06 | 1.33e-04  |
| ## SM(d40:1)          | -0.16100    | -0.23100 | -0.08980 | 24.0    | 9.70e-06 | 3.44e-04  |
| ## PC(0-36:3)         | -0.21200    | -0.30700 | -0.11600 | 20.4    | 1.47e-05 | 3.89e-04  |
| ## SM(d41:1)          | -0.17200    | -0.25500 | -0.08820 | 22.7    | 5.85e-05 | 1.24e-03  |
| ## PC(0-36:2)         | -0.17500    | -0.26100 | -0.08890 | 20.5    | 7.44e-05 | 1.31e-03  |
| ## PC(16:0e/18:1(9Z)  | -0.13200    | -0.20800 | -0.05650 | 21.8    | 6.47e-04 | 9.80e-03  |
| ## PC(34:2)           | 0.22000     | 0.08720  | 0.35200  | 26.0    | 1.18e-03 | 1.44e-02  |
| ## PC(0-38:6)         | -0.12400    | -0.19900 | -0.04910 | 20.4    | 1.22e-03 | 1.44e-02  |
| ## TG(45:0)           | -0.08900    | -0.14500 | -0.03270 | 23.1    | 2.00e-03 | 2.12e-02  |
| ## TG(56:3)           | 0.23600     | 0.07690  | 0.39500  | 19.9    | 3.69e-03 | 3.55e-02  |
| ## PC(32:2)           | -0.18800    | -0.31600 | -0.05960 | 20.8    | 4.13e-03 | 3.65e-02  |
| ## PC(0-34:2)         | -0.15700    | -0.26800 | -0.04580 | 21.5    | 5.73e-03 | 4.67e-02  |
| ## TG(18:0/18:1/20:4) | 0.24400     | 0.06010  | 0.42800  | 21.3    | 9.39e-03 | 6.78e-02  |
| ## SM(d39:1)          | -0.12800    | -0.22500 | -0.03100 | 21.1    | 9.77e-03 | 6.78e-02  |
| ## PC(37:2)           | -0.14900    | -0.26300 | -0.03460 | 19.3    | 1.07e-02 | 6.78e-02  |
| ## LPC(18:2)          | -0.14000    | -0.24800 | -0.03170 | 24.0    | 1.14e-02 | 6.78e-02  |
| ## SM(d38:1)          | -0.08610    | -0.15300 | -0.01940 | 23.1    | 1.15e-02 | 6.78e-02  |
| ## TG(56:4)           | 0.23100     | 0.04720  | 0.41400  | 20.0    | 1.38e-02 | 7.25e-02  |
| ## PC(32:0)           | -0.06220    | -0.11200 | -0.01260 | 22.5    | 1.41e-02 | 7.25e-02  |
| ## PC(38:6)           | -0.08800    | -0.15800 | -0.01760 | 25.3    | 1.44e-02 | 7.25e-02  |
| ## PC(0-36:5)         | -0.09540    | -0.17200 | -0.01840 | 22.3    | 1.52e-02 | 7.31e-02  |
| ## TG(53:3)           | 0.18700     | 0.02810  | 0.34500  | 20.7    | 2.11e-02 | 9.73e-02  |
| ## SM(d40:2)          | -0.07230    | -0.13500 | -0.00956 | 23.7    | 2.40e-02 | 1.06e-01  |
| ## TG(53:2)           | 0.18600     | 0.01640  | 0.35600  | 20.7    | 3.17e-02 | 1.34e-01  |
| ## PC(36:5)           | -0.17300    | -0.33500 | -0.01100 | 24.3    | 3.64e-02 | 1.48e-01  |

|                       |          |          |          |      |          |          |
|-----------------------|----------|----------|----------|------|----------|----------|
| ## PC(38:4)           | 0.05710  | 0.00328  | 0.11100  | 25.2 | 3.76e-02 | 1.48e-01 |
| ## TG(54:3)           | 0.09910  | 0.00411  | 0.19400  | 21.7 | 4.09e-02 | 1.51e-01 |
| ## PC(35:2)           | -0.09520 | -0.18700 | -0.00341 | 21.8 | 4.21e-02 | 1.51e-01 |
| ## SM(d41:2)          | -0.08100 | -0.15900 | -0.00268 | 22.5 | 4.27e-02 | 1.51e-01 |
| ## TG(51:2)           | 0.15700  | 0.00374  | 0.31000  | 21.6 | 4.47e-02 | 1.53e-01 |
| ## PC(40:6)           | -0.10200 | -0.20800 | 0.00467  | 23.9 | 6.09e-02 | 1.96e-01 |
| ## TG(52:2)           | 0.06750  | -0.00366 | 0.13900  | 22.6 | 6.30e-02 | 1.96e-01 |
| ## TG(52:4)           | 0.10700  | -0.00582 | 0.22000  | 21.7 | 6.30e-02 | 1.96e-01 |
| ## PC(38:2)           | -0.07250 | -0.15000 | 0.00461  | 21.3 | 6.53e-02 | 1.97e-01 |
| ## TG(16:0/18:2/18:3) | 0.20900  | -0.01450 | 0.43200  | 22.0 | 6.68e-02 | 1.97e-01 |
| ## TG(52:5)           | 0.16800  | -0.01430 | 0.35100  | 19.8 | 7.08e-02 | 2.03e-01 |
| ## TG(56:6)           | 0.10000  | -0.00936 | 0.21000  | 19.9 | 7.30e-02 | 2.04e-01 |
| ## TG(53:4)           | 0.15600  | -0.01700 | 0.32900  | 19.7 | 7.71e-02 | 2.10e-01 |
| ## PC(33:1)           | -0.08850 | -0.18900 | 0.01160  | 20.9 | 8.30e-02 | 2.15e-01 |
| ## PC(40:7)           | -0.09110 | -0.19400 | 0.01200  | 21.4 | 8.31e-02 | 2.15e-01 |
| ## PC(0-38:4)         | -0.07950 | -0.17100 | 0.01210  | 21.7 | 8.87e-02 | 2.21e-01 |
| ## SM(d38:2)          | -0.06150 | -0.13300 | 0.01000  | 21.3 | 9.17e-02 | 2.21e-01 |
| ## TG(16:0/22:5/18:1) | 0.11500  | -0.01910 | 0.25000  | 22.7 | 9.24e-02 | 2.21e-01 |
| ## TG(56:5)           | 0.11900  | -0.02020 | 0.25900  | 20.3 | 9.36e-02 | 2.21e-01 |
| ## TG(51:3)           | 0.13200  | -0.02500 | 0.28900  | 20.7 | 9.93e-02 | 2.29e-01 |
| ## TG(54:2)           | 0.12800  | -0.02990 | 0.28600  | 23.4 | 1.12e-01 | 2.52e-01 |
| ## TG(54:6)           | 0.14300  | -0.03630 | 0.32200  | 19.5 | 1.18e-01 | 2.57e-01 |
| ## TG(16:0/18:2/18:2) | 0.12000  | -0.03100 | 0.27100  | 24.5 | 1.19e-01 | 2.57e-01 |
| ## TG(14:0/18:1/18:1) | 0.10200  | -0.02800 | 0.23300  | 24.4 | 1.24e-01 | 2.57e-01 |
| ## TG(50:2)           | 0.08450  | -0.02320 | 0.19200  | 21.2 | 1.24e-01 | 2.57e-01 |
| ## TG(18:2/18:2/18:2) | 0.13100  | -0.04420 | 0.30600  | 22.1 | 1.43e-01 | 2.91e-01 |
| ## TG(18:1/18:1/18:1) | 0.09030  | -0.03150 | 0.21200  | 24.8 | 1.46e-01 | 2.92e-01 |
| ## TG(52:3)           | 0.05480  | -0.02060 | 0.13000  | 22.3 | 1.54e-01 | 2.98e-01 |
| ## TG(50:3)           | 0.10200  | -0.03860 | 0.24300  | 23.5 | 1.55e-01 | 2.98e-01 |
| ## PC(34:3)           | -0.10100 | -0.24400 | 0.04270  | 22.5 | 1.69e-01 | 3.19e-01 |
| ## TG(18:2/18:1/18:1) | 0.08940  | -0.03890 | 0.21800  | 24.4 | 1.72e-01 | 3.19e-01 |
| ## TG(54:4)           | 0.07300  | -0.03680 | 0.18300  | 21.4 | 1.92e-01 | 3.49e-01 |
| ## PC(0-38:5)         | -0.04560 | -0.11500 | 0.02380  | 22.7 | 1.97e-01 | 3.49e-01 |
| ## PC(36:3)           | -0.05100 | -0.12900 | 0.02670  | 25.6 | 1.98e-01 | 3.49e-01 |
| ## SM(42:2)           | -0.03490 | -0.09130 | 0.02140  | 25.2 | 2.24e-01 | 3.78e-01 |
| ## PC(38:5)           | -0.03090 | -0.08080 | 0.01900  | 24.5 | 2.24e-01 | 3.78e-01 |
| ## PC(40:5)           | -0.05820 | -0.15300 | 0.03610  | 22.0 | 2.26e-01 | 3.78e-01 |
| ## TG(54:5)           | 0.08220  | -0.05230 | 0.21700  | 20.6 | 2.31e-01 | 3.78e-01 |
| ## LPC(20:4)          | 0.06480  | -0.04150 | 0.17100  | 21.4 | 2.32e-01 | 3.78e-01 |
| ## PC(0-36:4)         | -0.04880 | -0.13000 | 0.03270  | 22.9 | 2.40e-01 | 3.83e-01 |
| ## SM(d34:1)          | 0.01940  | -0.01310 | 0.05190  | 24.9 | 2.42e-01 | 3.83e-01 |
| ## PC(32:1)           | -0.08240 | -0.22400 | 0.05950  | 23.3 | 2.55e-01 | 3.94e-01 |
| ## LPC(16:0)          | -0.02100 | -0.05760 | 0.01550  | 25.3 | 2.59e-01 | 3.94e-01 |
| ## TG(50:1)           | 0.09700  | -0.07200 | 0.26600  | 24.3 | 2.60e-01 | 3.94e-01 |
| ## TG(14:0/18:2/18:2) | 0.11400  | -0.08760 | 0.31600  | 21.2 | 2.67e-01 | 3.98e-01 |
| ## TG(56:7)           | 0.06900  | -0.05510 | 0.19300  | 19.6 | 2.75e-01 | 4.05e-01 |
| ## PC(35:1)           | -0.04720 | -0.13300 | 0.03860  | 21.8 | 2.81e-01 | 4.05e-01 |
| ## TG(18:1/18:2/18:2) | 0.08630  | -0.07140 | 0.24400  | 23.6 | 2.83e-01 | 4.05e-01 |
| ## SM(d33:1)          | -0.03980 | -0.11400 | 0.03460  | 21.3 | 2.94e-01 | 4.16e-01 |
| ## TG(51:1)           | 0.08310  | -0.08300 | 0.24900  | 20.3 | 3.26e-01 | 4.55e-01 |
| ## LPC(18:0)          | -0.03110 | -0.09610 | 0.03380  | 24.0 | 3.47e-01 | 4.77e-01 |
| ## TG(48:3)           | 0.10900  | -0.12200 | 0.34000  | 20.6 | 3.53e-01 | 4.77e-01 |
| ## TG(16:0/18:0/18:1) | 0.10100  | -0.11300 | 0.31500  | 23.1 | 3.56e-01 | 4.77e-01 |
| ## PC(36:4)           | 0.01880  | -0.02500 | 0.06270  | 26.0 | 4.00e-01 | 5.30e-01 |

|                       |          |          |         |      |          |          |
|-----------------------|----------|----------|---------|------|----------|----------|
| ## TG(18:1/18:1/16:0) | 0.04080  | -0.05660 | 0.13800 | 25.6 | 4.11e-01 | 5.33e-01 |
| ## SM(d16:1/18:1)     | -0.02750 | -0.09350 | 0.03860 | 22.8 | 4.14e-01 | 5.33e-01 |
| ## SM(d36:1)          | -0.02420 | -0.08280 | 0.03440 | 23.4 | 4.17e-01 | 5.33e-01 |
| ## LPC(18:1)          | -0.03350 | -0.11600 | 0.04870 | 23.7 | 4.24e-01 | 5.35e-01 |
| ## TG(18:1/12:0/18:1) | 0.06740  | -0.10400 | 0.23900 | 22.5 | 4.40e-01 | 5.49e-01 |
| ## TG(49:3)           | -0.00742 | -0.02680 | 0.01200 | 20.7 | 4.52e-01 | 5.58e-01 |
| ## SM(d36:2)          | 0.02310  | -0.04000 | 0.08620 | 21.4 | 4.73e-01 | 5.76e-01 |
| ## TG(49:2)           | 0.04040  | -0.07760 | 0.15800 | 20.4 | 5.02e-01 | 6.05e-01 |
| ## PC(36:2)           | -0.01740 | -0.07330 | 0.03850 | 26.1 | 5.41e-01 | 6.41e-01 |
| ## TG(49:1)           | 0.04000  | -0.09170 | 0.17200 | 20.9 | 5.51e-01 | 6.41e-01 |
| ## TG(14:0/16:0/18:1) | 0.05240  | -0.12200 | 0.22700 | 22.8 | 5.55e-01 | 6.41e-01 |
| ## TG(47:1)           | -0.04140 | -0.18000 | 0.09770 | 19.6 | 5.59e-01 | 6.41e-01 |
| ## TG(18:2/22:5/16:0) | 0.06480  | -0.15500 | 0.28400 | 22.1 | 5.62e-01 | 6.41e-01 |
| ## SM(d32:1)          | 0.01700  | -0.05520 | 0.08920 | 22.3 | 6.44e-01 | 7.24e-01 |
| ## TG(18:1/18:1/22:6) | 0.06000  | -0.19900 | 0.31900 | 20.7 | 6.49e-01 | 7.24e-01 |
| ## SM(d18:2/24:1)     | -0.01470 | -0.07970 | 0.05040 | 24.0 | 6.58e-01 | 7.27e-01 |
| ## TG(46:2)           | 0.03090  | -0.15500 | 0.21700 | 20.1 | 7.44e-01 | 8.05e-01 |
| ## TG(16:0/18:2/22:6) | -0.04760 | -0.33400 | 0.23900 | 21.0 | 7.44e-01 | 8.05e-01 |
| ## TG(46:0)           | -0.02080 | -0.18500 | 0.14400 | 20.4 | 8.04e-01 | 8.47e-01 |
| ## TG(18:2/18:1/16:0) | 0.01080  | -0.07540 | 0.09690 | 25.3 | 8.06e-01 | 8.47e-01 |
| ## PC(34:1)           | 0.00815  | -0.05730 | 0.07360 | 25.9 | 8.07e-01 | 8.47e-01 |
| ## TG(58:9)           | 0.02810  | -0.22700 | 0.28300 | 19.9 | 8.29e-01 | 8.61e-01 |
| ## LPC(16:1)          | -0.00809 | -0.11200 | 0.09630 | 20.0 | 8.79e-01 | 9.05e-01 |
| ## TG(50:0)           | 0.01180  | -0.18500 | 0.20900 | 20.8 | 9.06e-01 | 9.24e-01 |
| ## TG(46:1)           | 0.00909  | -0.16400 | 0.18200 | 21.3 | 9.18e-01 | 9.26e-01 |
| ## PC(38:3)           | 0.00258  | -0.08210 | 0.08730 | 24.0 | 9.52e-01 | 9.52e-01 |

##  
##

## Table: Coefficients for GroupHealthy Control  
## Results of the crude model for albuminuria group variable.  
## Shown in the table are name of the lipid (Name),  
## model coefficient (Coefficient),  
## its lower and upper confidence intervals (CI.L, CL.R),  
## average value of the variable (AveExpr),  
## p-value of the coefficient (P.Value) and  
## the p-value after correction for multiple testing (adj.P.Val).  
## The rows of the table are shown in an increasing order by the respective p-value.

| ## Name               | Coefficient | CI.L     | CI.R     | AveExpr | P.Value  | adj.P.Val |
|-----------------------|-------------|----------|----------|---------|----------|-----------|
| ## PC(38:3)           | 4.11e-01    | 0.26900  | 0.55200  | 24.0    | 0.00e+00 | 1.80e-06  |
| ## LPC(18:1)          | -3.29e-01   | -0.46600 | -0.19200 | 23.7    | 2.90e-06 | 1.52e-04  |
| ## LPC(18:2)          | -3.88e-01   | -0.56900 | -0.20800 | 24.0    | 2.67e-05 | 9.42e-04  |
| ## PC(0-36:2)         | -2.53e-01   | -0.39700 | -0.10900 | 20.5    | 5.79e-04 | 1.50e-02  |
| ## TG(14:0/18:2/18:2) | 5.79e-01    | 0.24300  | 0.91500  | 21.2    | 7.68e-04 | 1.50e-02  |
| ## PC(0-36:3)         | -2.70e-01   | -0.42900 | -0.11100 | 20.4    | 8.76e-04 | 1.50e-02  |
| ## TG(50:3)           | 3.94e-01    | 0.16000  | 0.62800  | 23.5    | 9.93e-04 | 1.50e-02  |
| ## PC(16:0e/18:1(9Z)  | -2.03e-01   | -0.32900 | -0.07650 | 21.8    | 1.68e-03 | 2.23e-02  |
| ## PC(0-38:5)         | -1.80e-01   | -0.29500 | -0.06400 | 22.7    | 2.36e-03 | 2.78e-02  |
| ## TG(16:0/18:2/18:2) | 3.74e-01    | 0.12300  | 0.62600  | 24.5    | 3.60e-03 | 3.48e-02  |
| ## PC(36:2)           | -1.39e-01   | -0.23200 | -0.04540 | 26.1    | 3.61e-03 | 3.48e-02  |
| ## TG(51:3)           | 3.76e-01    | 0.11500  | 0.63700  | 20.7    | 4.83e-03 | 4.27e-02  |
| ## TG(16:0/18:2/18:3) | 5.11e-01    | 0.13900  | 0.88200  | 22.0    | 7.13e-03 | 5.82e-02  |
| ## TG(52:5)           | 4.11e-01    | 0.10700  | 0.71500  | 19.8    | 8.21e-03 | 5.98e-02  |

|                       |           |          |          |      |          |          |
|-----------------------|-----------|----------|----------|------|----------|----------|
| ## PC(32:2)           | 2.83e-01  | 0.06980  | 0.49600  | 20.8 | 9.35e-03 | 5.98e-02 |
| ## TG(18:1/12:0/18:1) | 3.78e-01  | 0.09280  | 0.66300  | 22.5 | 9.47e-03 | 5.98e-02 |
| ## TG(48:3)           | 5.09e-01  | 0.12400  | 0.89300  | 20.6 | 9.60e-03 | 5.98e-02 |
| ## TG(14:0/18:1/18:1) | 2.80e-01  | 0.06250  | 0.49700  | 24.4 | 1.17e-02 | 6.88e-02 |
| ## TG(52:4)           | 2.35e-01  | 0.04680  | 0.42200  | 21.7 | 1.44e-02 | 7.65e-02 |
| ## TG(51:2)           | 3.18e-01  | 0.06350  | 0.57300  | 21.6 | 1.44e-02 | 7.65e-02 |
| ## TG(53:4)           | 3.51e-01  | 0.06280  | 0.63900  | 19.7 | 1.71e-02 | 8.39e-02 |
| ## TG(18:2/18:2/18:2) | 3.54e-01  | 0.06250  | 0.64600  | 22.1 | 1.74e-02 | 8.39e-02 |
| ## TG(45:0)           | -1.10e-01 | -0.20400 | -0.01630 | 23.1 | 2.15e-02 | 9.91e-02 |
| ## TG(50:2)           | 2.05e-01  | 0.02540  | 0.38400  | 21.2 | 2.53e-02 | 1.03e-01 |
| ## TG(16:0/18:2/22:6) | 5.43e-01  | 0.06650  | 1.02000  | 21.0 | 2.56e-02 | 1.03e-01 |
| ## PC(0-38:6)         | -1.42e-01 | -0.26700 | -0.01710 | 20.4 | 2.59e-02 | 1.03e-01 |
| ## PC(40:6)           | 2.01e-01  | 0.02390  | 0.37800  | 23.9 | 2.62e-02 | 1.03e-01 |
| ## TG(49:2)           | 2.21e-01  | 0.02470  | 0.41800  | 20.4 | 2.74e-02 | 1.04e-01 |
| ## TG(18:2/18:1/16:0) | 1.59e-01  | 0.01580  | 0.30300  | 25.3 | 2.97e-02 | 1.08e-01 |
| ## TG(14:0/16:0/18:1) | 3.17e-01  | 0.02680  | 0.60700  | 22.8 | 3.23e-02 | 1.14e-01 |
| ## TG(18:2/22:5/16:0) | 3.89e-01  | 0.02330  | 0.75400  | 22.1 | 3.71e-02 | 1.27e-01 |
| ## TG(52:3)           | 1.31e-01  | 0.00522  | 0.25700  | 22.3 | 4.12e-02 | 1.37e-01 |
| ## TG(54:6)           | 2.92e-01  | -0.00639 | 0.59100  | 19.5 | 5.51e-02 | 1.77e-01 |
| ## PC(36:3)           | 1.23e-01  | -0.00588 | 0.25300  | 25.6 | 6.13e-02 | 1.91e-01 |
| ## SM(d41:1)          | 1.31e-01  | -0.00755 | 0.27000  | 22.7 | 6.38e-02 | 1.92e-01 |
| ## PC(38:5)           | -7.79e-02 | -0.16100 | 0.00524  | 24.5 | 6.62e-02 | 1.92e-01 |
| ## TG(53:3)           | 2.47e-01  | -0.01770 | 0.51100  | 20.7 | 6.74e-02 | 1.92e-01 |
| ## PC(32:0)           | -7.62e-02 | -0.15900 | 0.00640  | 22.5 | 7.05e-02 | 1.92e-01 |
| ## SM(d39:1)          | 1.49e-01  | -0.01270 | 0.31000  | 21.1 | 7.08e-02 | 1.92e-01 |
| ## SM(d16:1/18:1)     | -9.50e-02 | -0.20500 | 0.01500  | 22.8 | 9.03e-02 | 2.39e-01 |
| ## TG(53:2)           | 2.41e-01  | -0.04250 | 0.52400  | 20.7 | 9.57e-02 | 2.47e-01 |
| ## TG(49:3)           | -2.70e-02 | -0.05930 | 0.00527  | 20.7 | 1.01e-01 | 2.49e-01 |
| ## PC(0-34:3)         | -1.25e-01 | -0.27400 | 0.02450  | 21.9 | 1.01e-01 | 2.49e-01 |
| ## TG(52:2)           | 9.71e-02  | -0.02140 | 0.21600  | 22.6 | 1.08e-01 | 2.60e-01 |
| ## PC(38:4)           | 7.16e-02  | -0.01810 | 0.16100  | 25.2 | 1.17e-01 | 2.76e-01 |
| ## TG(46:2)           | 2.43e-01  | -0.06670 | 0.55200  | 20.1 | 1.24e-01 | 2.85e-01 |
| ## TG(50:1)           | 2.20e-01  | -0.06200 | 0.50100  | 24.3 | 1.26e-01 | 2.85e-01 |
| ## TG(51:1)           | 2.12e-01  | -0.06430 | 0.48900  | 20.3 | 1.32e-01 | 2.92e-01 |
| ## TG(56:7)           | 1.49e-01  | -0.05710 | 0.35600  | 19.6 | 1.56e-01 | 3.37e-01 |
| ## TG(46:1)           | 1.98e-01  | -0.08910 | 0.48600  | 21.3 | 1.76e-01 | 3.67e-01 |
| ## TG(49:1)           | 1.51e-01  | -0.06860 | 0.37000  | 20.9 | 1.78e-01 | 3.67e-01 |
| ## LPC(20:4)          | -1.21e-01 | -0.29800 | 0.05650  | 21.4 | 1.82e-01 | 3.67e-01 |
| ## PC(0-36:4)         | -9.20e-02 | -0.22800 | 0.04370  | 22.9 | 1.84e-01 | 3.67e-01 |
| ## PC(40:7)           | -1.07e-01 | -0.27900 | 0.06450  | 21.4 | 2.21e-01 | 4.33e-01 |
| ## PC(34:2)           | 1.36e-01  | -0.08430 | 0.35700  | 26.0 | 2.26e-01 | 4.35e-01 |
| ## PC(36:4)           | 4.29e-02  | -0.03020 | 0.11600  | 26.0 | 2.49e-01 | 4.72e-01 |
| ## TG(56:5)           | 1.33e-01  | -0.09940 | 0.36500  | 20.3 | 2.62e-01 | 4.81e-01 |
| ## TG(16:0/22:5/18:1) | 1.28e-01  | -0.09640 | 0.35200  | 22.7 | 2.63e-01 | 4.81e-01 |
| ## TG(54:3)           | -8.85e-02 | -0.24700 | 0.06980  | 21.7 | 2.73e-01 | 4.85e-01 |
| ## TG(18:1/18:2/18:2) | 1.46e-01  | -0.11600 | 0.40900  | 23.6 | 2.75e-01 | 4.85e-01 |
| ## SM(d38:1)          | 6.00e-02  | -0.05110 | 0.17100  | 23.1 | 2.89e-01 | 4.96e-01 |
| ## PC(0-34:2)         | -9.99e-02 | -0.28500 | 0.08530  | 21.5 | 2.90e-01 | 4.96e-01 |
| ## TG(18:1/18:1/16:0) | 8.64e-02  | -0.07580 | 0.24900  | 25.6 | 2.96e-01 | 4.96e-01 |
| ## SM(42:2)           | -4.96e-02 | -0.14400 | 0.04430  | 25.2 | 3.00e-01 | 4.96e-01 |
| ## SM(d40:1)          | 6.08e-02  | -0.05710 | 0.17900  | 24.0 | 3.12e-01 | 5.08e-01 |
| ## TG(56:3)           | -1.31e-01 | -0.39500 | 0.13400  | 19.9 | 3.33e-01 | 5.35e-01 |
| ## PC(38:6)           | 5.72e-02  | -0.06000 | 0.17400  | 25.3 | 3.38e-01 | 5.35e-01 |
| ## PC(0-38:4)         | -7.19e-02 | -0.22400 | 0.08070  | 21.7 | 3.55e-01 | 5.48e-01 |

|                       |           |          |         |      |          |          |
|-----------------------|-----------|----------|---------|------|----------|----------|
| ## PC(40:5)           | 7.38e-02  | -0.08340 | 0.23100 | 22.0 | 3.57e-01 | 5.48e-01 |
| ## SM(d34:1)          | -2.47e-02 | -0.07890 | 0.02940 | 24.9 | 3.70e-01 | 5.50e-01 |
| ## PC(35:1)           | -6.40e-02 | -0.20700 | 0.07900 | 21.8 | 3.80e-01 | 5.50e-01 |
| ## SM(d18:1/24:0)     | 5.57e-02  | -0.06890 | 0.18000 | 23.6 | 3.81e-01 | 5.50e-01 |
| ## SM(d41:2)          | 5.80e-02  | -0.07250 | 0.18800 | 22.5 | 3.83e-01 | 5.50e-01 |
| ## SM(d18:2/24:1)     | -4.81e-02 | -0.15600 | 0.06030 | 24.0 | 3.84e-01 | 5.50e-01 |
| ## TG(56:4)           | -1.33e-01 | -0.43900 | 0.17200 | 20.0 | 3.91e-01 | 5.51e-01 |
| ## TG(18:0/18:1/20:4) | -1.32e-01 | -0.43800 | 0.17400 | 21.3 | 3.98e-01 | 5.51e-01 |
| ## PC(37:2)           | -8.13e-02 | -0.27100 | 0.10900 | 19.3 | 4.01e-01 | 5.51e-01 |
| ## PC(0-36:5)         | -5.39e-02 | -0.18200 | 0.07420 | 22.3 | 4.09e-01 | 5.56e-01 |
| ## PC(32:1)           | 9.43e-02  | -0.14200 | 0.33100 | 23.3 | 4.34e-01 | 5.78e-01 |
| ## TG(18:1/18:1/18:1) | -8.05e-02 | -0.28300 | 0.12200 | 24.8 | 4.36e-01 | 5.78e-01 |
| ## TG(16:0/18:0/18:1) | 1.33e-01  | -0.22300 | 0.49000 | 23.1 | 4.63e-01 | 6.00e-01 |
| ## PC(35:2)           | -5.70e-02 | -0.21000 | 0.09590 | 21.8 | 4.65e-01 | 6.00e-01 |
| ## TG(58:9)           | 1.46e-01  | -0.27900 | 0.57100 | 19.9 | 5.00e-01 | 6.39e-01 |
| ## SM(d36:2)          | 3.29e-02  | -0.07230 | 0.13800 | 21.4 | 5.39e-01 | 6.80e-01 |
| ## LPC(18:0)          | 2.98e-02  | -0.07840 | 0.13800 | 24.0 | 5.89e-01 | 7.34e-01 |
| ## TG(47:1)           | 6.07e-02  | -0.17100 | 0.29200 | 19.6 | 6.07e-01 | 7.48e-01 |
| ## SM(d33:1)          | -3.19e-02 | -0.15600 | 0.09210 | 21.3 | 6.14e-01 | 7.48e-01 |
| ## TG(54:4)           | -3.87e-02 | -0.22200 | 0.14400 | 21.4 | 6.78e-01 | 8.16e-01 |
| ## TG(18:1/18:1/22:6) | 8.04e-02  | -0.35100 | 0.51200 | 20.7 | 7.14e-01 | 8.44e-01 |
| ## PC(36:5)           | -4.99e-02 | -0.32000 | 0.22000 | 24.3 | 7.16e-01 | 8.44e-01 |
| ## LPC(16:1)          | 2.63e-02  | -0.14800 | 0.20000 | 20.0 | 7.67e-01 | 8.74e-01 |
| ## PC(38:2)           | 1.94e-02  | -0.10900 | 0.14800 | 21.3 | 7.67e-01 | 8.74e-01 |
| ## TG(18:2/18:1/18:1) | 3.20e-02  | -0.18200 | 0.24600 | 24.4 | 7.68e-01 | 8.74e-01 |
| ## PC(34:1)           | -1.58e-02 | -0.12500 | 0.09320 | 25.9 | 7.76e-01 | 8.74e-01 |
| ## SM(d40:2)          | 1.46e-02  | -0.08990 | 0.11900 | 23.7 | 7.83e-01 | 8.74e-01 |
| ## SM(d32:1)          | -1.61e-02 | -0.13600 | 0.10400 | 22.3 | 7.92e-01 | 8.75e-01 |
| ## TG(50:0)           | 4.06e-02  | -0.28700 | 0.36800 | 20.8 | 8.08e-01 | 8.75e-01 |
| ## SM(d36:1)          | 1.20e-02  | -0.08560 | 0.11000 | 23.4 | 8.09e-01 | 8.75e-01 |
| ## PC(33:1)           | 1.89e-02  | -0.14800 | 0.18600 | 20.9 | 8.24e-01 | 8.83e-01 |
| ## TG(54:5)           | 1.91e-02  | -0.20500 | 0.24300 | 20.6 | 8.67e-01 | 9.11e-01 |
| ## TG(54:2)           | -2.24e-02 | -0.28600 | 0.24100 | 23.4 | 8.68e-01 | 9.11e-01 |
| ## TG(46:0)           | 1.61e-02  | -0.25800 | 0.29000 | 20.4 | 9.08e-01 | 9.44e-01 |
| ## TG(56:6)           | -8.82e-03 | -0.19100 | 0.17300 | 19.9 | 9.24e-01 | 9.51e-01 |
| ## SM(d38:2)          | 4.36e-03  | -0.11500 | 0.12300 | 21.3 | 9.43e-01 | 9.61e-01 |
| ## PC(34:3)           | -6.02e-03 | -0.24500 | 0.23200 | 22.5 | 9.60e-01 | 9.70e-01 |
| ## LPC(16:0)          | 8.15e-05  | -0.06080 | 0.06100 | 25.3 | 9.98e-01 | 9.98e-01 |

### 1.1.1.1.2 Heatmaps of Model Coefficients

```
## Loading required package: stringr
```

```
## Label Relation p.adj
```

```
## 1 # p.adj < 0.01
```

```
## 2 x p.adj < 0.05
```

```
## 3 * p.adj < 0.10
```

```
## Label Relation p.adj
```

```
## 1 # p.adj < 0.01
```

```
## 2 x p.adj < 0.05
```

```
## 3 * p.adj < 0.10
```

```
## Label Relation p.adj
```

```
## 1 # p.adj < 0.01
```

```
## 2 x p.adj < 0.05
```

```
## 3 * p.adj < 0.10
```



# GroupT1D.Micro

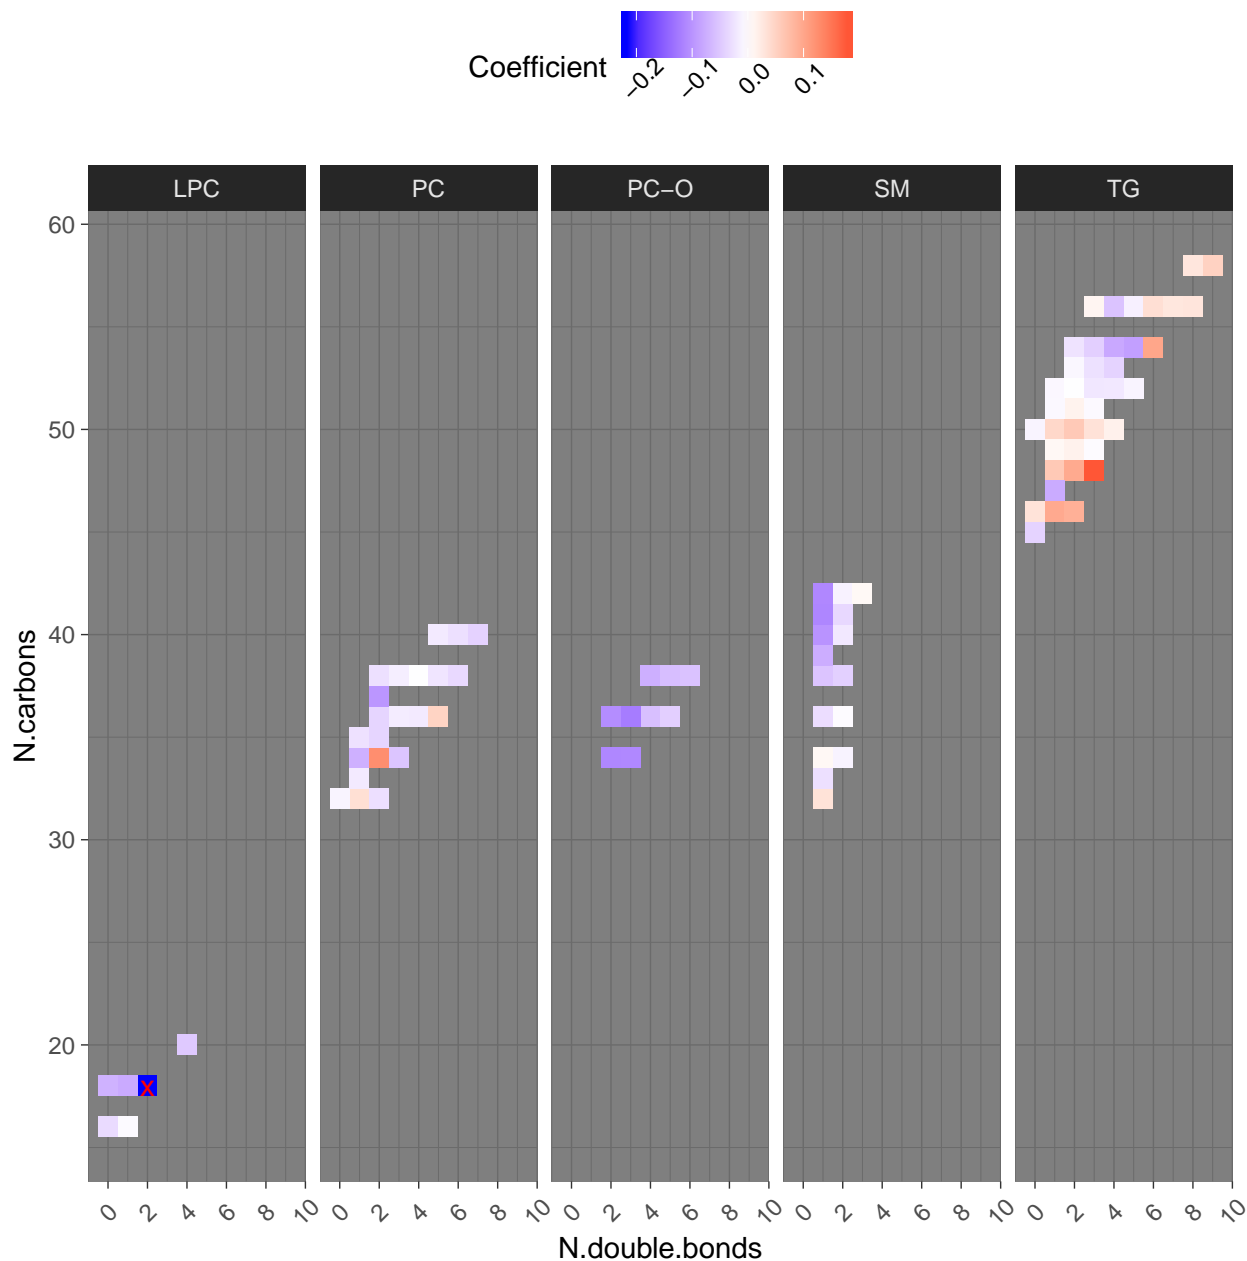

Figure 1: Heatmap of the lipid-specific model coefficients from the crude model for albuminuria groups. The name of the group is shown in the title of the figure in the top-left corner. Lipids are organized into panels (columns) by their class (from LPC to TG). One colored rectangle corresponds to one lipid species, where the coordinates in the x-axis and y-axis, respectively, show the number of double bonds (N.double.bonds) and the number of carbon atoms (N.carbons) in the fatty acid chains of the lipid. The number of double bonds corresponds to the number of unsaturated bonds in the fatty acid chains, and the number of carbon atoms corresponds to the length of the fatty acid chains and, thus, the size of the lipid. The magnitude of the lipid-specific model coefficient is shown as the color of the rectangle (blue: negative; red: positive). Coefficient with statistical significance are annotated with symbols #, x and \*, respectively, corresponding to  $p < 0.01$ ,  $p < 0.05$  and  $p < 0.1$ .

# GroupT1D.Macro

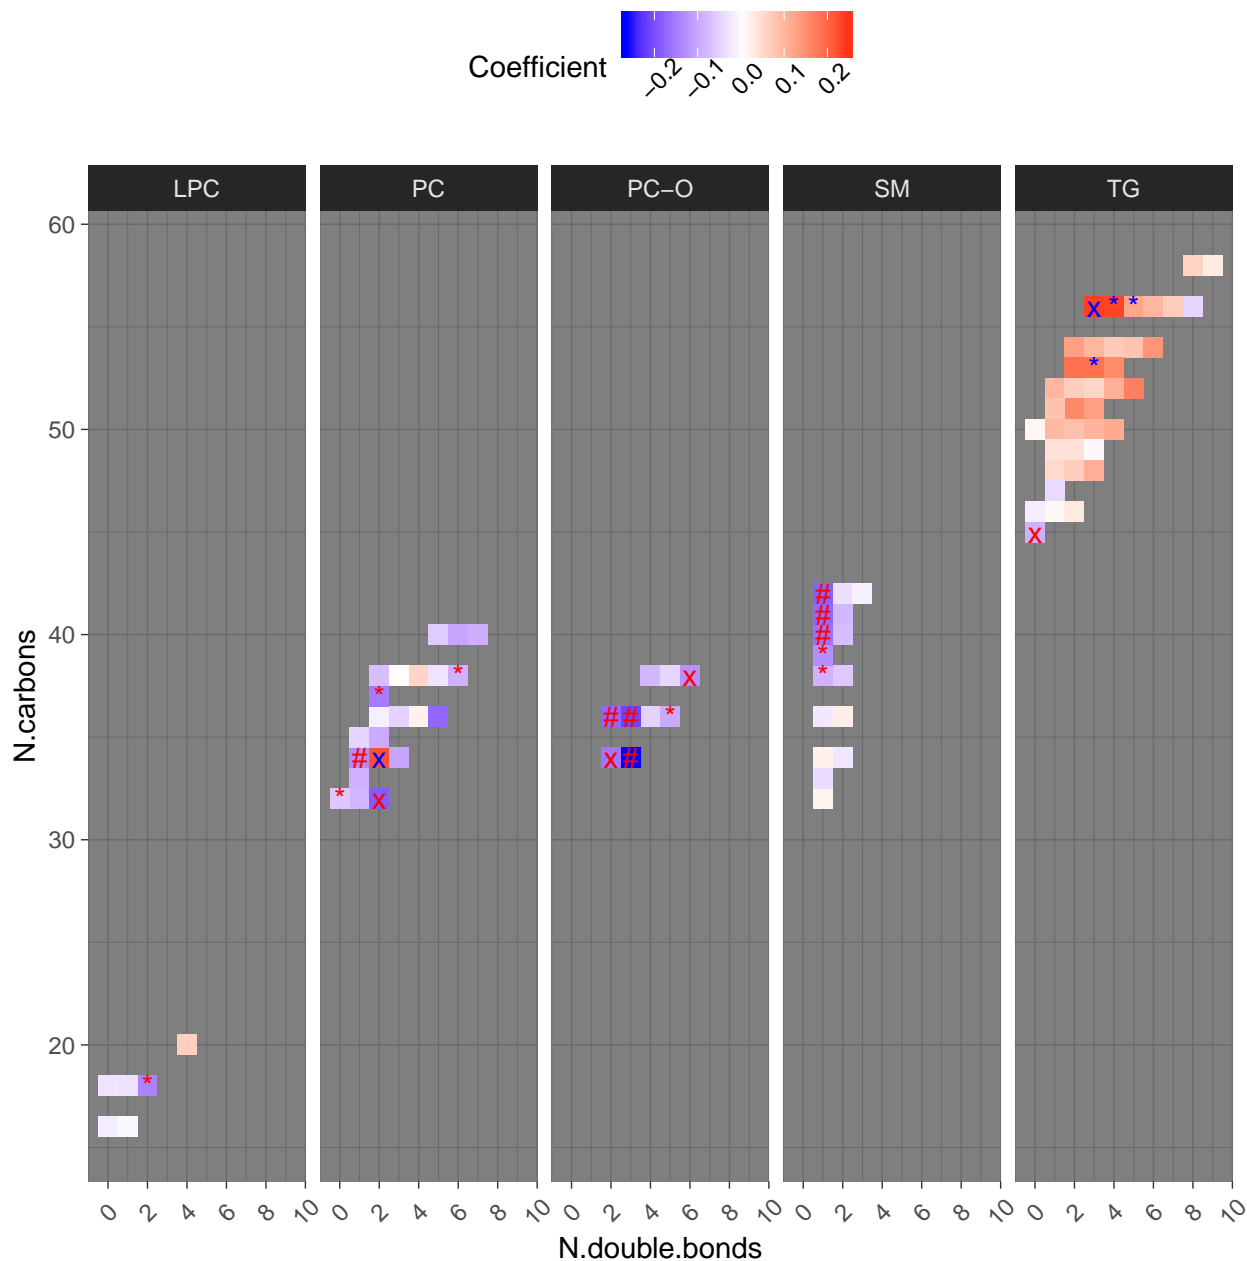

Figure 2: Heatmap of the lipid-specific model coefficients from the crude model for albuminuria groups. The name of the group is shown in the title of the figure in the top-left corner. Lipids are organized into panels (columns) by their class (from LPC to TG). One colored rectangle corresponds to one lipid species, where the coordinates in the x-axis and y-axis, respectively, show the number of double bonds (N.double.bonds) and the number of carbon atoms (N.carbons) in the fatty acid chains of the lipid. The number of double bonds corresponds to the number of unsaturated bonds in the fatty acid chains, and the number of carbon atoms corresponds to the length of the fatty acid chains and, thus, the size of the lipid. The magnitude of the lipid-specific model coefficient is shown as the color of the rectangle (blue: negative; red: positive). Coefficient with statistical significance are annotated with symbols #, x and \*, respectively, corresponding to  $p < 0.01$ ,  $p < 0.05$  and  $p < 0.1$ .

# GroupHealthy.Control

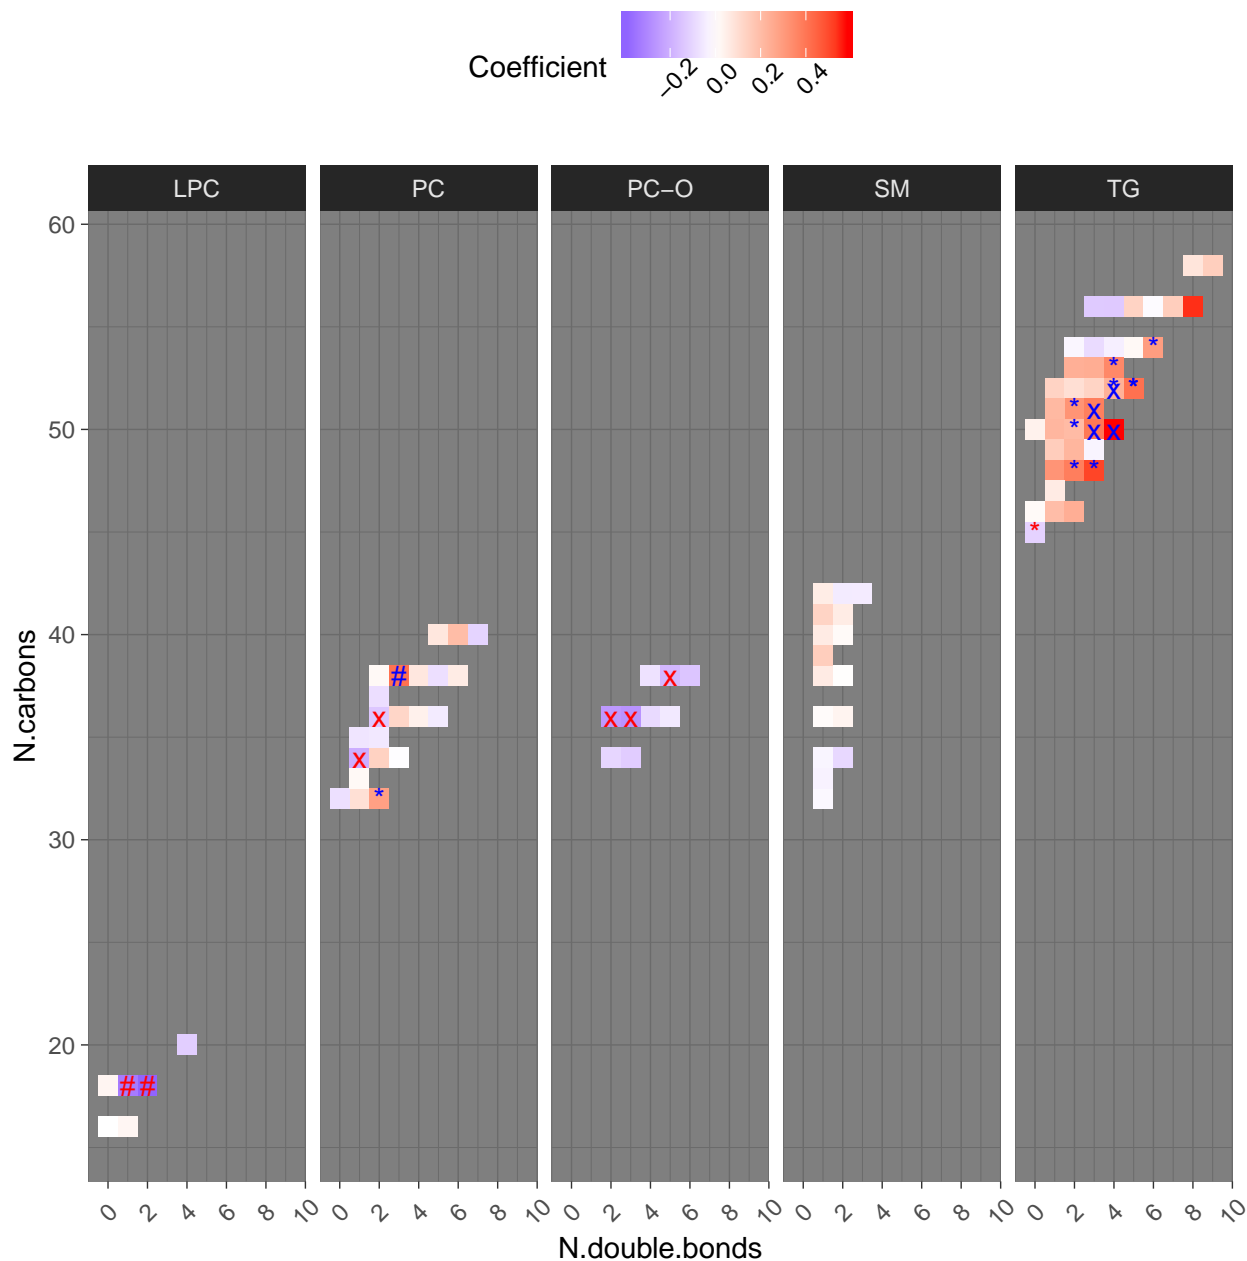

Figure 3: Heatmap of the lipid-specific model coefficients from the crude model for albuminuria groups. The name of the group is shown in the title of the figure in the top-left corner. Lipids are organized into panels (columns) by their class (from LPC to TG). One colored rectangle corresponds to one lipid species, where the coordinates in the x-axis and y-axis, respectively, show the number of double bonds (N.double.bonds) and the number of carbon atoms (N.carbons) in the fatty acid chains of the lipid. The number of double bonds corresponds to the number of unsaturated bonds in the fatty acid chains, and the number of carbon atoms corresponds to the length of the fatty acid chains and, thus, the size of the lipid. The magnitude of the lipid-specific model coefficient is shown as the color of the rectangle (blue: negative; red: positive). Coefficient with statistical significance are annotated with symbols #, x and \*, respectively, corresponding to  $p < 0.01$ ,  $p < 0.05$  and  $p < 0.1$ .

### 1.1.1.2 Adjusted Model

### 1.1.1.2.1 Table

```
##
##
## Table: Coefficients for GroupT1D Micro
## Results of the adjusted model for albuminuria group variable.
## Shown in the table are name of the lipid (Name),
## model coefficient (Coefficient),
## its lower and upper confidence intervals (CI.L, CL.R),
## average value of the variable (AveExpr),
## p-value of the coefficient (P.Value) and
## the p-value after correction for multiple testing (adj.P.Val).
## The rows of the table are shown in an increasing order by the respective p-value.
##
```

| ## Name               | Coefficient | CI.L    | CI.R      | AveExpr | P.Value  | adj.P.Val |
|-----------------------|-------------|---------|-----------|---------|----------|-----------|
| ## LPC(18:2)          | -0.193000   | -0.3040 | -8.25e-02 | 24.0    | 0.000648 | 0.0686    |
| ## TG(18:1/18:1/18:1) | -0.159000   | -0.2580 | -5.94e-02 | 24.8    | 0.001780 | 0.0946    |
| ## SM(d18:1/24:0)     | -0.089100   | -0.1520 | -2.60e-02 | 23.6    | 0.005680 | 0.1690    |
| ## TG(54:3)           | -0.093900   | -0.1630 | -2.44e-02 | 21.7    | 0.008130 | 0.1690    |
| ## SM(d40:1)          | -0.076500   | -0.1340 | -1.89e-02 | 24.0    | 0.009270 | 0.1690    |
| ## SM(d36:2)          | -0.073900   | -0.1310 | -1.69e-02 | 21.4    | 0.011200 | 0.1690    |
| ## TG(54:2)           | -0.125000   | -0.2230 | -2.61e-02 | 23.4    | 0.013300 | 0.1690    |
| ## LPC(20:4)          | -0.138000   | -0.2480 | -2.81e-02 | 21.4    | 0.013900 | 0.1690    |
| ## TG(56:5)           | -0.135000   | -0.2430 | -2.65e-02 | 20.3    | 0.014800 | 0.1690    |
| ## TG(54:4)           | -0.114000   | -0.2060 | -2.13e-02 | 21.4    | 0.016000 | 0.1690    |
| ## SM(d36:1)          | -0.059100   | -0.1090 | -9.06e-03 | 23.4    | 0.020700 | 0.1880    |
| ## SM(d41:1)          | -0.085200   | -0.1580 | -1.28e-02 | 22.7    | 0.021200 | 0.1880    |
| ## TG(56:4)           | -0.162000   | -0.3030 | -2.07e-02 | 20.0    | 0.024700 | 0.1900    |
| ## TG(16:0/22:5/18:1) | -0.123000   | -0.2310 | -1.43e-02 | 22.7    | 0.026600 | 0.1900    |
| ## TG(18:2/18:1/18:1) | -0.118000   | -0.2230 | -1.36e-02 | 24.4    | 0.026900 | 0.1900    |
| ## TG(18:1/18:2/18:2) | -0.142000   | -0.2740 | -1.01e-02 | 23.6    | 0.034900 | 0.2310    |
| ## LPC(18:1)          | -0.086100   | -0.1710 | -1.58e-03 | 23.7    | 0.045900 | 0.2860    |
| ## TG(54:5)           | -0.118000   | -0.2370 | -4.78e-05 | 20.6    | 0.049900 | 0.2940    |
| ## PC(0-38:6)         | -0.072700   | -0.1470 | 1.29e-03  | 20.4    | 0.054100 | 0.3020    |
| ## SM(d38:1)          | -0.055500   | -0.1130 | 1.81e-03  | 23.1    | 0.057700 | 0.3060    |
| ## TG(52:2)           | -0.042800   | -0.0880 | 2.42e-03  | 22.6    | 0.063500 | 0.3180    |
| ## SM(d38:2)          | -0.060100   | -0.1240 | 4.18e-03  | 21.3    | 0.066800 | 0.3180    |
| ## TG(52:3)           | -0.049600   | -0.1030 | 3.89e-03  | 22.3    | 0.069100 | 0.3180    |
| ## TG(53:2)           | -0.102000   | -0.2160 | 1.22e-02  | 20.7    | 0.080100 | 0.3460    |
| ## TG(48:3)           | 0.159000    | -0.0200 | 3.38e-01  | 20.6    | 0.081600 | 0.3460    |
| ## LPC(18:0)          | -0.056900   | -0.1220 | 8.08e-03  | 24.0    | 0.086000 | 0.3510    |
| ## TG(53:3)           | -0.096100   | -0.2080 | 1.59e-02  | 20.7    | 0.092400 | 0.3630    |
| ## PC(0-38:5)         | -0.060600   | -0.1320 | 1.12e-02  | 22.7    | 0.097900 | 0.3710    |
| ## TG(18:1/18:1/16:0) | -0.082200   | -0.1840 | 1.91e-02  | 25.6    | 0.112000 | 0.4080    |
| ## TG(56:6)           | -0.076800   | -0.1730 | 1.98e-02  | 19.9    | 0.119000 | 0.4200    |
| ## PC(0-36:5)         | -0.062100   | -0.1420 | 1.80e-02  | 22.3    | 0.129000 | 0.4230    |
| ## TG(18:2/18:1/16:0) | -0.068100   | -0.1570 | 2.05e-02  | 25.3    | 0.132000 | 0.4230    |
| ## SM(d16:1/18:1)     | -0.036900   | -0.0857 | 1.18e-02  | 22.8    | 0.137000 | 0.4230    |
| ## TG(18:1/12:0/18:1) | 0.090500    | -0.0307 | 2.12e-01  | 22.5    | 0.143000 | 0.4230    |
| ## PC(38:4)           | -0.039300   | -0.0922 | 1.37e-02  | 25.2    | 0.146000 | 0.4230    |
| ## SM(d39:1)          | -0.067100   | -0.1590 | 2.44e-02  | 21.1    | 0.151000 | 0.4230    |
| ## TG(46:1)           | 0.105000    | -0.0382 | 2.48e-01  | 21.3    | 0.151000 | 0.4230    |
| ## PC(0-36:4)         | -0.062000   | -0.1470 | 2.28e-02  | 22.9    | 0.152000 | 0.4230    |

|                       |           |         |          |      |          |        |
|-----------------------|-----------|---------|----------|------|----------|--------|
| ## TG(16:0/18:2/18:2) | -0.080700 | -0.1930 | 3.13e-02 | 24.5 | 0.158000 | 0.4260 |
| ## LPC(16:0)          | -0.025200 | -0.0608 | 1.04e-02 | 25.3 | 0.165000 | 0.4260 |
| ## PC(0-36:2)         | -0.058300 | -0.1410 | 2.43e-02 | 20.5 | 0.166000 | 0.4260 |
| ## TG(45:0)           | -0.023900 | -0.0581 | 1.03e-02 | 23.1 | 0.170000 | 0.4260 |
| ## PC(32:2)           | 0.085000  | -0.0373 | 2.07e-01 | 20.8 | 0.173000 | 0.4260 |
| ## PC(0-36:3)         | -0.058000 | -0.1450 | 2.88e-02 | 20.4 | 0.190000 | 0.4430 |
| ## PC(0-38:4)         | -0.063100 | -0.1580 | 3.14e-02 | 21.7 | 0.190000 | 0.4430 |
| ## TG(56:3)           | -0.077500 | -0.1950 | 4.00e-02 | 19.9 | 0.196000 | 0.4430 |
| ## TG(16:0/18:2/18:3) | -0.122000 | -0.3070 | 6.32e-02 | 22.0 | 0.196000 | 0.4430 |
| ## TG(16:0/18:0/18:1) | -0.101000 | -0.2580 | 5.59e-02 | 23.1 | 0.207000 | 0.4450 |
| ## TG(46:2)           | 0.093400  | -0.0529 | 2.40e-01 | 20.1 | 0.211000 | 0.4450 |
| ## TG(18:0/18:1/20:4) | -0.111000 | -0.2850 | 6.31e-02 | 21.3 | 0.211000 | 0.4450 |
| ## TG(53:4)           | -0.086100 | -0.2220 | 4.98e-02 | 19.7 | 0.214000 | 0.4450 |
| ## TG(50:2)           | 0.042400  | -0.0260 | 1.11e-01 | 21.2 | 0.224000 | 0.4560 |
| ## PC(36:4)           | -0.025700 | -0.0724 | 2.10e-02 | 26.0 | 0.280000 | 0.5410 |
| ## TG(56:7)           | -0.064300 | -0.1810 | 5.28e-02 | 19.6 | 0.281000 | 0.5410 |
| ## SM(d40:2)          | -0.028200 | -0.0795 | 2.31e-02 | 23.7 | 0.282000 | 0.5410 |
| ## PC(34:2)           | 0.076000  | -0.0637 | 2.16e-01 | 26.0 | 0.286000 | 0.5410 |
| ## TG(52:4)           | -0.045400 | -0.1310 | 4.06e-02 | 21.7 | 0.300000 | 0.5440 |
| ## TG(47:1)           | -0.078000 | -0.2270 | 7.05e-02 | 19.6 | 0.303000 | 0.5440 |
| ## PC(32:1)           | 0.071000  | -0.0660 | 2.08e-01 | 23.3 | 0.309000 | 0.5440 |
| ## TG(16:0/18:2/22:6) | -0.144000 | -0.4240 | 1.35e-01 | 21.0 | 0.310000 | 0.5440 |
| ## TG(18:1/18:1/22:6) | -0.131000 | -0.3890 | 1.27e-01 | 20.7 | 0.320000 | 0.5440 |
| ## PC(40:5)           | -0.043700 | -0.1300 | 4.29e-02 | 22.0 | 0.322000 | 0.5440 |
| ## PC(38:5)           | -0.024300 | -0.0725 | 2.40e-02 | 24.5 | 0.324000 | 0.5440 |
| ## SM(d41:2)          | -0.034000 | -0.1030 | 3.47e-02 | 22.5 | 0.331000 | 0.5490 |
| ## SM(d33:1)          | -0.031600 | -0.0984 | 3.53e-02 | 21.3 | 0.354000 | 0.5690 |
| ## TG(51:1)           | -0.055500 | -0.1730 | 6.21e-02 | 20.3 | 0.355000 | 0.5690 |
| ## PC(16:0e/18:1(9Z)) | -0.032700 | -0.1030 | 3.77e-02 | 21.8 | 0.362000 | 0.5710 |
| ## PC(40:6)           | -0.044400 | -0.1410 | 5.26e-02 | 23.9 | 0.369000 | 0.5710 |
| ## TG(14:0/18:1/18:1) | 0.036400  | -0.0436 | 1.16e-01 | 24.4 | 0.372000 | 0.5710 |
| ## PC(38:6)           | -0.029300 | -0.0954 | 3.67e-02 | 25.3 | 0.384000 | 0.5810 |
| ## TG(50:0)           | -0.070200 | -0.2310 | 9.10e-02 | 20.8 | 0.393000 | 0.5860 |
| ## TG(58:9)           | -0.111000 | -0.3710 | 1.49e-01 | 19.9 | 0.402000 | 0.5920 |
| ## TG(14:0/16:0/18:1) | 0.053000  | -0.0746 | 1.81e-01 | 22.8 | 0.415000 | 0.6020 |
| ## TG(18:2/22:5/16:0) | -0.081700 | -0.2840 | 1.20e-01 | 22.1 | 0.427000 | 0.6110 |
| ## PC(0-34:3)         | -0.032100 | -0.1140 | 5.02e-02 | 21.9 | 0.444000 | 0.6280 |
| ## TG(18:2/18:2/18:2) | -0.055400 | -0.2020 | 9.07e-02 | 22.1 | 0.457000 | 0.6370 |
| ## TG(51:2)           | -0.034000 | -0.1290 | 6.07e-02 | 21.6 | 0.481000 | 0.6560 |
| ## PC(35:1)           | -0.028500 | -0.1080 | 5.12e-02 | 21.8 | 0.483000 | 0.6560 |
| ## PC(36:2)           | -0.020600 | -0.0809 | 3.97e-02 | 26.1 | 0.502000 | 0.6740 |
| ## PC(34:1)           | 0.022400  | -0.0488 | 9.36e-02 | 25.9 | 0.537000 | 0.7110 |
| ## PC(0-34:2)         | -0.033900 | -0.1460 | 7.78e-02 | 21.5 | 0.551000 | 0.7150 |
| ## TG(46:0)           | 0.042100  | -0.0973 | 1.81e-01 | 20.4 | 0.553000 | 0.7150 |
| ## TG(52:5)           | -0.046200 | -0.2050 | 1.13e-01 | 19.8 | 0.568000 | 0.7260 |
| ## SM(d34:1)          | -0.008390 | -0.0388 | 2.20e-02 | 24.9 | 0.589000 | 0.7350 |
| ## SM(42:2)           | -0.013500 | -0.0624 | 3.55e-02 | 25.2 | 0.590000 | 0.7350 |
| ## TG(51:3)           | -0.028900 | -0.1400 | 8.23e-02 | 20.7 | 0.610000 | 0.7460 |
| ## PC(33:1)           | 0.024000  | -0.0688 | 1.17e-01 | 20.9 | 0.612000 | 0.7460 |
| ## PC(32:0)           | 0.010800  | -0.0364 | 5.80e-02 | 22.5 | 0.654000 | 0.7800 |
| ## SM(d32:1)          | 0.014200  | -0.0480 | 7.63e-02 | 22.3 | 0.655000 | 0.7800 |
| ## PC(38:3)           | -0.014800 | -0.0914 | 6.18e-02 | 24.0 | 0.705000 | 0.8300 |
| ## PC(36:5)           | -0.028300 | -0.1820 | 1.25e-01 | 24.3 | 0.717000 | 0.8350 |
| ## PC(38:2)           | 0.011600  | -0.0590 | 8.22e-02 | 21.3 | 0.748000 | 0.8610 |

|                       |           |         |          |      |          |        |
|-----------------------|-----------|---------|----------|------|----------|--------|
| ## TG(49:2)           | 0.013700  | -0.0791 | 1.06e-01 | 20.4 | 0.772000 | 0.8800 |
| ## PC(40:7)           | -0.012500 | -0.1090 | 8.45e-02 | 21.4 | 0.801000 | 0.9030 |
| ## PC(37:2)           | -0.009400 | -0.1190 | 1.00e-01 | 19.3 | 0.867000 | 0.9610 |
| ## TG(14:0/18:2/18:2) | -0.011200 | -0.1470 | 1.25e-01 | 21.2 | 0.872000 | 0.9610 |
| ## LPC(16:1)          | 0.008170  | -0.1000 | 1.17e-01 | 20.0 | 0.882000 | 0.9610 |
| ## TG(50:1)           | 0.008810  | -0.1150 | 1.32e-01 | 24.3 | 0.889000 | 0.9610 |
| ## TG(50:3)           | 0.004710  | -0.0734 | 8.28e-02 | 23.5 | 0.906000 | 0.9670 |
| ## PC(34:3)           | 0.007930  | -0.1330 | 1.49e-01 | 22.5 | 0.912000 | 0.9670 |
| ## SM(d18:2/24:1)     | -0.002360 | -0.0589 | 5.42e-02 | 24.0 | 0.935000 | 0.9750 |
| ## PC(36:3)           | 0.002540  | -0.0751 | 8.01e-02 | 25.6 | 0.949000 | 0.9750 |
| ## TG(54:6)           | 0.005130  | -0.1540 | 1.64e-01 | 19.5 | 0.949000 | 0.9750 |
| ## TG(49:3)           | 0.000334  | -0.0140 | 1.47e-02 | 20.7 | 0.963000 | 0.9750 |
| ## PC(35:2)           | -0.001960 | -0.0923 | 8.83e-02 | 21.8 | 0.966000 | 0.9750 |
| ## TG(49:1)           | -0.001130 | -0.1070 | 1.04e-01 | 20.9 | 0.983000 | 0.9830 |

##

##

## Table: Coefficients for GroupT1D Macro

## Results of the adjusted model for albuminuria group variable.

## Shown in the table are name of the lipid (Name),

## model coefficient (Coefficient),

## its lower and upper confidence intervals (CI.L, CL.R),

## average value of the variable (AveExpr),

## p-value of the coefficient (P.Value) and

## the p-value after correction for multiple testing (adj.P.Val).

## The rows of the table are shown in an increasing order by the respective p-value.

##

| ## Name               | Coefficient | CI.L     | CI.R     | AveExpr | P.Value  | adj.P.Val |
|-----------------------|-------------|----------|----------|---------|----------|-----------|
| ## SM(d40:1)          | -0.15600    | -0.22000 | -0.09170 | 24.0    | 2.20e-06 | 0.000228  |
| ## SM(d18:1/24:0)     | -0.15300    | -0.22300 | -0.08330 | 23.6    | 1.95e-05 | 0.001030  |
| ## SM(d41:1)          | -0.17000    | -0.25000 | -0.08920 | 22.7    | 3.93e-05 | 0.001390  |
| ## SM(d38:1)          | -0.13100    | -0.19400 | -0.06700 | 23.1    | 6.16e-05 | 0.001630  |
| ## SM(d40:2)          | -0.11200    | -0.16900 | -0.05470 | 23.7    | 1.29e-04 | 0.002740  |
| ## TG(54:2)           | -0.19600    | -0.30500 | -0.08640 | 23.4    | 4.72e-04 | 0.008340  |
| ## SM(d38:2)          | -0.12400    | -0.19500 | -0.05220 | 21.3    | 7.12e-04 | 0.009630  |
| ## SM(d39:1)          | -0.17600    | -0.27700 | -0.07400 | 21.1    | 7.27e-04 | 0.009630  |
| ## PC(0-34:3)         | -0.14700    | -0.23800 | -0.05570 | 21.9    | 1.65e-03 | 0.019400  |
| ## TG(52:2)           | -0.07900    | -0.12900 | -0.02880 | 22.6    | 2.08e-03 | 0.022000  |
| ## PC(0-36:2)         | -0.14100    | -0.23300 | -0.04940 | 20.5    | 2.62e-03 | 0.024600  |
| ## SM(d36:2)          | -0.09670    | -0.16000 | -0.03350 | 21.4    | 2.78e-03 | 0.024600  |
| ## TG(52:3)           | -0.08990    | -0.14900 | -0.03050 | 22.3    | 3.07e-03 | 0.025000  |
| ## SM(d36:1)          | -0.08050    | -0.13600 | -0.02490 | 23.4    | 4.60e-03 | 0.034800  |
| ## SM(d41:2)          | -0.10700    | -0.18300 | -0.03040 | 22.5    | 6.21e-03 | 0.043900  |
| ## TG(54:3)           | -0.10600    | -0.18300 | -0.02850 | 21.7    | 7.32e-03 | 0.047100  |
| ## TG(53:2)           | -0.17300    | -0.29900 | -0.04620 | 20.7    | 7.55e-03 | 0.047100  |
| ## PC(0-38:6)         | -0.10900    | -0.19100 | -0.02650 | 20.4    | 9.58e-03 | 0.054300  |
| ## SM(d16:1/18:1)     | -0.07150    | -0.12600 | -0.01740 | 22.8    | 9.72e-03 | 0.054300  |
| ## PC(0-38:4)         | -0.13400    | -0.23900 | -0.02890 | 21.7    | 1.25e-02 | 0.064900  |
| ## PC(0-36:5)         | -0.11300    | -0.20200 | -0.02400 | 22.3    | 1.29e-02 | 0.064900  |
| ## PC(0-36:3)         | -0.12100    | -0.21700 | -0.02450 | 20.4    | 1.40e-02 | 0.066800  |
| ## TG(18:2/18:1/18:1) | -0.14500    | -0.26100 | -0.02880 | 24.4    | 1.46e-02 | 0.066800  |
| ## TG(18:1/18:1/18:1) | -0.13700    | -0.24700 | -0.02650 | 24.8    | 1.51e-02 | 0.066800  |
| ## TG(56:5)           | -0.13900    | -0.25900 | -0.01850 | 20.3    | 2.38e-02 | 0.101000  |
| ## TG(16:0/22:5/18:1) | -0.13800    | -0.25900 | -0.01760 | 22.7    | 2.47e-02 | 0.101000  |

|                       |          |          |          |      |          |          |
|-----------------------|----------|----------|----------|------|----------|----------|
| ## TG(54:4)           | -0.11400 | -0.21600 | -0.01120 | 21.4 | 2.97e-02 | 0.117000 |
| ## TG(56:6)           | -0.10900 | -0.21700 | -0.00229 | 19.9 | 4.53e-02 | 0.172000 |
| ## PC(35:1)           | -0.08650 | -0.17500 | 0.00197  | 21.8 | 5.53e-02 | 0.198000 |
| ## TG(51:1)           | -0.12700 | -0.25800 | 0.00326  | 20.3 | 5.60e-02 | 0.198000 |
| ## TG(16:0/18:0/18:1) | -0.15600 | -0.33000 | 0.01800  | 23.1 | 7.89e-02 | 0.263000 |
| ## SM(d33:1)          | -0.06590 | -0.14000 | 0.00828  | 21.3 | 8.16e-02 | 0.263000 |
| ## TG(16:0/18:2/18:2) | -0.11000 | -0.23500 | 0.01400  | 24.5 | 8.20e-02 | 0.263000 |
| ## TG(50:0)           | -0.15700 | -0.33600 | 0.02190  | 20.8 | 8.54e-02 | 0.266000 |
| ## PC(34:2)           | 0.13500  | -0.02000 | 0.29000  | 26.0 | 8.78e-02 | 0.266000 |
| ## PC(35:2)           | -0.08590 | -0.18600 | 0.01430  | 21.8 | 9.28e-02 | 0.267000 |
| ## TG(52:4)           | -0.08160 | -0.17700 | 0.01390  | 21.7 | 9.37e-02 | 0.267000 |
| ## TG(53:3)           | -0.10600 | -0.23000 | 0.01870  | 20.7 | 9.56e-02 | 0.267000 |
| ## PC(38:3)           | -0.07020 | -0.15500 | 0.01490  | 24.0 | 1.06e-01 | 0.284000 |
| ## TG(50:3)           | -0.07080 | -0.15800 | 0.01590  | 23.5 | 1.09e-01 | 0.284000 |
| ## PC(36:3)           | -0.07010 | -0.15600 | 0.01600  | 25.6 | 1.10e-01 | 0.284000 |
| ## TG(18:0/18:1/20:4) | -0.15600 | -0.34900 | 0.03690  | 21.3 | 1.13e-01 | 0.284000 |
| ## PC(38:4)           | -0.04720 | -0.10600 | 0.01160  | 25.2 | 1.15e-01 | 0.284000 |
| ## PC(16:0e/18:1(9Z)) | -0.06180 | -0.14000 | 0.01630  | 21.8 | 1.21e-01 | 0.289000 |
| ## TG(56:4)           | -0.12400 | -0.28100 | 0.03340  | 20.0 | 1.23e-01 | 0.289000 |
| ## TG(51:2)           | -0.08060 | -0.18600 | 0.02450  | 21.6 | 1.33e-01 | 0.304000 |
| ## TG(18:1/18:2/18:2) | -0.11200 | -0.25800 | 0.03480  | 23.6 | 1.35e-01 | 0.304000 |
| ## PC(0-36:4)         | -0.06740 | -0.16200 | 0.02680  | 22.9 | 1.61e-01 | 0.355000 |
| ## TG(54:5)           | -0.09120 | -0.22300 | 0.04010  | 20.6 | 1.73e-01 | 0.374000 |
| ## TG(53:4)           | -0.10300 | -0.25400 | 0.04760  | 19.7 | 1.79e-01 | 0.380000 |
| ## PC(0-38:5)         | -0.05360 | -0.13300 | 0.02610  | 22.7 | 1.87e-01 | 0.389000 |
| ## PC(38:5)           | -0.03420 | -0.08780 | 0.01930  | 24.5 | 2.10e-01 | 0.428000 |
| ## LPC(20:4)          | -0.07590 | -0.19800 | 0.04620  | 21.4 | 2.23e-01 | 0.445000 |
| ## TG(51:3)           | -0.07460 | -0.19800 | 0.04890  | 20.7 | 2.36e-01 | 0.459000 |
| ## PC(36:5)           | -0.10200 | -0.27300 | 0.06800  | 24.3 | 2.38e-01 | 0.459000 |
| ## LPC(18:2)          | -0.07270 | -0.19600 | 0.05020  | 24.0 | 2.46e-01 | 0.459000 |
| ## TG(18:2/18:1/16:0) | -0.05800 | -0.15600 | 0.04040  | 25.3 | 2.48e-01 | 0.459000 |
| ## LPC(16:1)          | 0.06960  | -0.05080 | 0.19000  | 20.0 | 2.57e-01 | 0.459000 |
| ## TG(18:1/18:1/16:0) | -0.06500 | -0.17800 | 0.04750  | 25.6 | 2.57e-01 | 0.459000 |
| ## TG(49:1)           | -0.06720 | -0.18400 | 0.04980  | 20.9 | 2.60e-01 | 0.459000 |
| ## TG(56:3)           | -0.06900 | -0.19900 | 0.06140  | 19.9 | 2.99e-01 | 0.520000 |
| ## TG(14:0/18:1/18:1) | -0.04600 | -0.13500 | 0.04280  | 24.4 | 3.10e-01 | 0.529000 |
| ## TG(16:0/18:2/22:6) | -0.15400 | -0.46400 | 0.15600  | 21.0 | 3.29e-01 | 0.554000 |
| ## TG(49:3)           | 0.00773  | -0.00817 | 0.02360  | 20.7 | 3.40e-01 | 0.563000 |
| ## SM(42:2)           | -0.02470 | -0.07900 | 0.02970  | 25.2 | 3.73e-01 | 0.608000 |
| ## PC(33:1)           | -0.04620 | -0.14900 | 0.05680  | 20.9 | 3.79e-01 | 0.609000 |
| ## TG(14:0/18:2/18:2) | -0.06500 | -0.21600 | 0.08580  | 21.2 | 3.98e-01 | 0.621000 |
| ## SM(d18:2/24:1)     | -0.02680 | -0.08950 | 0.03600  | 24.0 | 4.03e-01 | 0.621000 |
| ## TG(50:1)           | -0.05820 | -0.19500 | 0.07880  | 24.3 | 4.04e-01 | 0.621000 |
| ## TG(49:2)           | -0.04150 | -0.14400 | 0.06150  | 20.4 | 4.29e-01 | 0.650000 |
| ## PC(37:2)           | -0.04710 | -0.16900 | 0.07480  | 19.3 | 4.48e-01 | 0.669000 |
| ## PC(40:5)           | -0.03600 | -0.13200 | 0.06010  | 22.0 | 4.62e-01 | 0.680000 |
| ## SM(d32:1)          | -0.02510 | -0.09410 | 0.04400  | 22.3 | 4.76e-01 | 0.691000 |
| ## TG(45:0)           | 0.01350  | -0.02450 | 0.05140  | 23.1 | 4.86e-01 | 0.696000 |
| ## PC(32:0)           | 0.01720  | -0.03520 | 0.06960  | 22.5 | 5.20e-01 | 0.735000 |
| ## PC(38:6)           | -0.02340 | -0.09680 | 0.04990  | 25.3 | 5.31e-01 | 0.740000 |
| ## PC(36:2)           | -0.02050 | -0.08750 | 0.04640  | 26.1 | 5.48e-01 | 0.754000 |
| ## PC(40:6)           | -0.03230 | -0.14000 | 0.07540  | 23.9 | 5.56e-01 | 0.755000 |
| ## TG(50:2)           | -0.02210 | -0.09790 | 0.05380  | 21.2 | 5.68e-01 | 0.763000 |
| ## TG(18:2/18:2/18:2) | -0.04380 | -0.20600 | 0.11800  | 22.1 | 5.96e-01 | 0.782000 |



|                       |          |          |         |      |          |          |
|-----------------------|----------|----------|---------|------|----------|----------|
| ## TG(52:5)           | -0.04690 | -0.22300 | 0.13000 | 19.8 | 6.02e-01 | 0.782000 |
| ## SM(d34:1)          | 0.00869  | -0.02510 | 0.04250 | 24.9 | 6.14e-01 | 0.782000 |
| ## TG(46:1)           | -0.03820 | -0.19700 | 0.12000 | 21.3 | 6.36e-01 | 0.782000 |
| ## TG(16:0/18:2/18:3) | -0.04950 | -0.25500 | 0.15600 | 22.0 | 6.37e-01 | 0.782000 |
| ## TG(56:7)           | -0.03090 | -0.16100 | 0.09920 | 19.6 | 6.41e-01 | 0.782000 |
| ## TG(18:1/12:0/18:1) | -0.03200 | -0.16700 | 0.10300 | 22.5 | 6.41e-01 | 0.782000 |
| ## TG(54:6)           | -0.04180 | -0.21800 | 0.13500 | 19.5 | 6.42e-01 | 0.782000 |
| ## TG(47:1)           | -0.03710 | -0.20200 | 0.12800 | 19.6 | 6.59e-01 | 0.794000 |
| ## TG(46:2)           | -0.03420 | -0.19700 | 0.12800 | 20.1 | 6.79e-01 | 0.809000 |
| ## TG(14:0/16:0/18:1) | -0.02720 | -0.16900 | 0.11400 | 22.8 | 7.07e-01 | 0.832000 |
| ## PC(0-34:2)         | -0.02290 | -0.14700 | 0.10100 | 21.5 | 7.17e-01 | 0.835000 |
| ## PC(38:2)           | -0.01340 | -0.09180 | 0.06500 | 21.3 | 7.37e-01 | 0.849000 |
| ## PC(32:2)           | -0.02220 | -0.15800 | 0.11400 | 20.8 | 7.48e-01 | 0.851000 |
| ## TG(46:0)           | -0.02410 | -0.17900 | 0.13100 | 20.4 | 7.60e-01 | 0.851000 |
| ## TG(18:2/22:5/16:0) | -0.03340 | -0.25700 | 0.19100 | 22.1 | 7.70e-01 | 0.851000 |
| ## PC(32:1)           | 0.02230  | -0.13000 | 0.17400 | 23.3 | 7.74e-01 | 0.851000 |
| ## TG(48:3)           | -0.02680 | -0.22600 | 0.17200 | 20.6 | 7.91e-01 | 0.851000 |
| ## TG(18:1/18:1/22:6) | 0.03850  | -0.24800 | 0.32500 | 20.7 | 7.92e-01 | 0.851000 |
| ## LPC(18:1)          | -0.01240 | -0.10600 | 0.08140 | 23.7 | 7.95e-01 | 0.851000 |
| ## LPC(16:0)          | 0.00421  | -0.03530 | 0.04370 | 25.3 | 8.34e-01 | 0.884000 |
| ## TG(58:9)           | -0.02750 | -0.31600 | 0.26100 | 19.9 | 8.52e-01 | 0.886000 |
| ## PC(34:1)           | 0.00749  | -0.07160 | 0.08660 | 25.9 | 8.52e-01 | 0.886000 |
| ## LPC(18:0)          | 0.00534  | -0.06680 | 0.07750 | 24.0 | 8.85e-01 | 0.910000 |
| ## PC(36:4)           | -0.00304 | -0.05490 | 0.04880 | 26.0 | 9.08e-01 | 0.926000 |
| ## PC(40:7)           | -0.00257 | -0.11000 | 0.10500 | 21.4 | 9.63e-01 | 0.972000 |
| ## PC(34:3)           | -0.00029 | -0.15700 | 0.15600 | 22.5 | 9.97e-01 | 0.997000 |

##  
##

## Table: Coefficients for GroupHealthy Control  
## Results of the adjusted model for albuminuria group variable.  
## Shown in the table are name of the lipid (Name),  
## model coefficient (Coefficient),  
## its lower and upper confidence intervals (CI.L, CL.R),  
## average value of the variable (AveExpr),  
## p-value of the coefficient (P.Value) and  
## the p-value after correction for multiple testing (adj.P.Val).  
## The rows of the table are shown in an increasing order by the respective p-value.

| ## Name              | Coefficient | CI.L      | CI.R     | AveExpr | P.Value  | adj.P.Val |
|----------------------|-------------|-----------|----------|---------|----------|-----------|
| ## LPC(18:1)         | -0.432000   | -0.584000 | -0.27900 | 23.7    | 0.00e+00 | 4.40e-06  |
| ## PC(16:0e/18:1(9Z) | -0.316000   | -0.443000 | -0.18900 | 21.8    | 1.30e-06 | 6.70e-05  |
| ## PC(32:0)          | -0.189000   | -0.274000 | -0.10300 | 22.5    | 1.62e-05 | 4.99e-04  |
| ## PC(0-36:3)        | -0.344000   | -0.501000 | -0.18700 | 20.4    | 1.88e-05 | 4.99e-04  |
| ## LPC(18:2)         | -0.426000   | -0.626000 | -0.22500 | 24.0    | 3.36e-05 | 7.13e-04  |
| ## PC(38:5)          | -0.179000   | -0.266000 | -0.09200 | 24.5    | 6.07e-05 | 1.07e-03  |
| ## PC(0-36:2)        | -0.299000   | -0.449000 | -0.15000 | 20.5    | 9.08e-05 | 1.26e-03  |
| ## PC(38:3)          | 0.277000    | 0.138000  | 0.41500  | 24.0    | 9.54e-05 | 1.26e-03  |
| ## PC(40:7)          | -0.333000   | -0.508000 | -0.15800 | 21.4    | 2.06e-04 | 2.43e-03  |
| ## PC(0-34:3)        | -0.277000   | -0.425000 | -0.12800 | 21.9    | 2.80e-04 | 2.97e-03  |
| ## PC(0-38:5)        | -0.236000   | -0.366000 | -0.10700 | 22.7    | 3.73e-04 | 3.60e-03  |
| ## TG(50:3)          | 0.249000    | 0.108000  | 0.39000  | 23.5    | 5.58e-04 | 4.93e-03  |
| ## PC(36:2)          | -0.185000   | -0.294000 | -0.07580 | 26.1    | 9.18e-04 | 7.49e-03  |
| ## PC(0-38:6)        | -0.223000   | -0.357000 | -0.08960 | 20.4    | 1.09e-03 | 8.25e-03  |

|                       |           |           |          |      |          |          |
|-----------------------|-----------|-----------|----------|------|----------|----------|
| ## TG(16:0/18:2/18:2) | 0.327000  | 0.124000  | 0.52900  | 24.5 | 1.58e-03 | 1.12e-02 |
| ## TG(51:3)           | 0.309000  | 0.108000  | 0.51000  | 20.7 | 2.59e-03 | 1.72e-02 |
| ## TG(53:3)           | 0.304000  | 0.102000  | 0.50600  | 20.7 | 3.27e-03 | 2.04e-02 |
| ## SM(d16:1/18:1)     | -0.131000 | -0.219000 | -0.04300 | 22.8 | 3.59e-03 | 2.11e-02 |
| ## TG(52:4)           | 0.226000  | 0.070400  | 0.38100  | 21.7 | 4.46e-03 | 2.40e-02 |
| ## TG(14:0/18:2/18:2) | 0.356000  | 0.111000  | 0.60200  | 21.2 | 4.53e-03 | 2.40e-02 |
| ## SM(d39:1)          | 0.229000  | 0.063300  | 0.39400  | 21.1 | 6.79e-03 | 3.04e-02 |
| ## TG(51:2)           | 0.236000  | 0.065100  | 0.40700  | 21.6 | 6.89e-03 | 3.04e-02 |
| ## TG(53:4)           | 0.338000  | 0.092500  | 0.58400  | 19.7 | 7.04e-03 | 3.04e-02 |
| ## SM(42:2)           | -0.122000 | -0.210000 | -0.03330 | 25.2 | 7.05e-03 | 3.04e-02 |
| ## TG(45:0)           | -0.084900 | -0.147000 | -0.02310 | 23.1 | 7.17e-03 | 3.04e-02 |
| ## TG(53:2)           | 0.281000  | 0.074400  | 0.48700  | 20.7 | 7.71e-03 | 3.14e-02 |
| ## TG(52:5)           | 0.387000  | 0.099900  | 0.67400  | 19.8 | 8.32e-03 | 3.22e-02 |
| ## PC(38:2)           | -0.172000 | -0.299000 | -0.04390 | 21.3 | 8.49e-03 | 3.22e-02 |
| ## TG(16:0/18:2/18:3) | 0.440000  | 0.105000  | 0.77500  | 22.0 | 1.01e-02 | 3.69e-02 |
| ## TG(52:3)           | 0.122000  | 0.025700  | 0.21900  | 22.3 | 1.32e-02 | 4.67e-02 |
| ## TG(18:2/18:2/18:2) | 0.328000  | 0.064300  | 0.59200  | 22.1 | 1.49e-02 | 5.09e-02 |
| ## SM(d36:2)          | 0.125000  | 0.022400  | 0.22800  | 21.4 | 1.71e-02 | 5.66e-02 |
| ## SM(d18:2/24:1)     | -0.122000 | -0.224000 | -0.02010 | 24.0 | 1.91e-02 | 6.01e-02 |
| ## PC(37:2)           | -0.237000 | -0.436000 | -0.03870 | 19.3 | 1.93e-02 | 6.01e-02 |
| ## LPC(16:0)          | -0.073200 | -0.138000 | -0.00888 | 25.3 | 2.58e-02 | 7.81e-02 |
| ## PC(0-34:2)         | -0.228000 | -0.430000 | -0.02640 | 21.5 | 2.67e-02 | 7.87e-02 |
| ## LPC(16:1)          | -0.208000 | -0.404000 | -0.01220 | 20.0 | 3.74e-02 | 1.07e-01 |
| ## TG(16:0/18:2/22:6) | 0.514000  | 0.009420  | 1.02000  | 21.0 | 4.59e-02 | 1.28e-01 |
| ## TG(14:0/18:1/18:1) | 0.145000  | 0.000898  | 0.29000  | 24.4 | 4.86e-02 | 1.32e-01 |
| ## SM(d41:1)          | 0.130000  | -0.000909 | 0.26100  | 22.7 | 5.16e-02 | 1.37e-01 |
| ## TG(52:2)           | 0.077800  | -0.003870 | 0.16000  | 22.6 | 6.19e-02 | 1.54e-01 |
| ## PC(0-36:4)         | -0.146000 | -0.299000 | 0.00775  | 22.9 | 6.27e-02 | 1.54e-01 |
| ## PC(36:5)           | -0.263000 | -0.540000 | 0.01450  | 24.3 | 6.32e-02 | 1.54e-01 |
| ## TG(48:3)           | 0.306000  | -0.017700 | 0.63000  | 20.6 | 6.39e-02 | 1.54e-01 |
| ## PC(34:2)           | 0.234000  | -0.018300 | 0.48600  | 26.0 | 6.90e-02 | 1.63e-01 |
| ## PC(40:5)           | -0.144000 | -0.301000 | 0.01240  | 22.0 | 7.11e-02 | 1.64e-01 |
| ## TG(18:2/22:5/16:0) | 0.334000  | -0.030900 | 0.69800  | 22.1 | 7.28e-02 | 1.64e-01 |
| ## TG(16:0/22:5/18:1) | 0.178000  | -0.018500 | 0.37400  | 22.7 | 7.58e-02 | 1.67e-01 |
| ## TG(56:5)           | 0.170000  | -0.026100 | 0.36500  | 20.3 | 8.93e-02 | 1.93e-01 |
| ## TG(18:2/18:1/16:0) | 0.138000  | -0.022400 | 0.29800  | 25.3 | 9.18e-02 | 1.95e-01 |
| ## PC(33:1)           | -0.141000 | -0.309000 | 0.02640  | 20.9 | 9.86e-02 | 2.03e-01 |
| ## PC(38:4)           | 0.080000  | -0.015700 | 0.17600  | 25.2 | 1.01e-01 | 2.03e-01 |
| ## TG(46:0)           | -0.210000 | -0.462000 | 0.04170  | 20.4 | 1.02e-01 | 2.03e-01 |
| ## SM(d38:1)          | 0.085800  | -0.017700 | 0.18900  | 23.1 | 1.04e-01 | 2.04e-01 |
| ## TG(56:3)           | -0.173000 | -0.386000 | 0.03900  | 19.9 | 1.09e-01 | 2.11e-01 |
| ## TG(54:6)           | 0.221000  | -0.065800 | 0.50800  | 19.5 | 1.31e-01 | 2.47e-01 |
| ## PC(34:3)           | -0.195000 | -0.450000 | 0.05960  | 22.5 | 1.33e-01 | 2.47e-01 |
| ## PC(32:1)           | -0.188000 | -0.435000 | 0.06000  | 23.3 | 1.37e-01 | 2.51e-01 |
| ## TG(18:1/12:0/18:1) | 0.164000  | -0.055100 | 0.38300  | 22.5 | 1.42e-01 | 2.55e-01 |
| ## PC(35:1)           | -0.106000 | -0.250000 | 0.03810  | 21.8 | 1.49e-01 | 2.64e-01 |
| ## PC(38:6)           | -0.084200 | -0.204000 | 0.03530  | 25.3 | 1.67e-01 | 2.89e-01 |
| ## TG(18:1/18:1/16:0) | 0.128000  | -0.054700 | 0.31200  | 25.6 | 1.69e-01 | 2.89e-01 |
| ## TG(18:1/18:2/18:2) | 0.156000  | -0.082800 | 0.39400  | 23.6 | 2.00e-01 | 3.37e-01 |
| ## TG(54:3)           | -0.080400 | -0.206000 | 0.04510  | 21.7 | 2.09e-01 | 3.46e-01 |
| ## TG(56:7)           | 0.132000  | -0.079900 | 0.34300  | 19.6 | 2.22e-01 | 3.62e-01 |
| ## TG(18:0/18:1/20:4) | 0.193000  | -0.122000 | 0.50700  | 21.3 | 2.29e-01 | 3.68e-01 |
| ## PC(0-36:5)         | -0.085700 | -0.230000 | 0.05900  | 22.3 | 2.45e-01 | 3.88e-01 |
| ## TG(50:2)           | 0.068100  | -0.055400 | 0.19200  | 21.2 | 2.79e-01 | 4.35e-01 |

|                       |           |           |         |      |          |          |
|-----------------------|-----------|-----------|---------|------|----------|----------|
| ## TG(51:1)           | 0.109000  | -0.103000 | 0.32200 | 20.3 | 3.13e-01 | 4.81e-01 |
| ## LPC(18:0)          | -0.058000 | -0.175000 | 0.05940 | 24.0 | 3.32e-01 | 5.03e-01 |
| ## PC(35:2)           | -0.078600 | -0.242000 | 0.08450 | 21.8 | 3.44e-01 | 5.08e-01 |
| ## SM(d36:1)          | 0.043600  | -0.046900 | 0.13400 | 23.4 | 3.45e-01 | 5.08e-01 |
| ## SM(d41:2)          | 0.058600  | -0.065600 | 0.18300 | 22.5 | 3.55e-01 | 5.15e-01 |
| ## TG(49:2)           | 0.076100  | -0.091500 | 0.24400 | 20.4 | 3.73e-01 | 5.34e-01 |
| ## TG(49:3)           | -0.011300 | -0.037200 | 0.01460 | 20.7 | 3.92e-01 | 5.54e-01 |
| ## TG(56:4)           | -0.110000 | -0.365000 | 0.14600 | 20.0 | 4.00e-01 | 5.58e-01 |
| ## LPC(20:4)          | -0.080700 | -0.279000 | 0.11800 | 21.4 | 4.25e-01 | 5.84e-01 |
| ## SM(d40:1)          | 0.041900  | -0.062100 | 0.14600 | 24.0 | 4.29e-01 | 5.84e-01 |
| ## TG(58:9)           | 0.182000  | -0.288000 | 0.65300 | 19.9 | 4.47e-01 | 5.99e-01 |
| ## TG(47:1)           | -0.097400 | -0.366000 | 0.17100 | 19.6 | 4.77e-01 | 6.32e-01 |
| ## TG(14:0/16:0/18:1) | 0.075300  | -0.155000 | 0.30600 | 22.8 | 5.21e-01 | 6.82e-01 |
| ## TG(50:1)           | 0.070700  | -0.152000 | 0.29400 | 24.3 | 5.34e-01 | 6.83e-01 |
| ## PC(36:3)           | 0.044300  | -0.095900 | 0.18500 | 25.6 | 5.35e-01 | 6.83e-01 |
| ## TG(54:5)           | 0.064500  | -0.149000 | 0.27800 | 20.6 | 5.53e-01 | 6.98e-01 |
| ## TG(18:2/18:1/18:1) | 0.049600  | -0.140000 | 0.23900 | 24.4 | 6.07e-01 | 7.39e-01 |
| ## PC(0-38:4)         | -0.044100 | -0.215000 | 0.12700 | 21.7 | 6.13e-01 | 7.39e-01 |
| ## TG(56:6)           | 0.044900  | -0.130000 | 0.21900 | 19.9 | 6.13e-01 | 7.39e-01 |
| ## PC(36:4)           | 0.021700  | -0.062700 | 0.10600 | 26.0 | 6.14e-01 | 7.39e-01 |
| ## TG(18:1/18:1/18:1) | -0.043200 | -0.223000 | 0.13600 | 24.8 | 6.37e-01 | 7.58e-01 |
| ## TG(54:2)           | -0.041900 | -0.220000 | 0.13600 | 23.4 | 6.45e-01 | 7.59e-01 |
| ## TG(50:0)           | -0.051900 | -0.343000 | 0.23900 | 20.8 | 7.26e-01 | 8.46e-01 |
| ## PC(32:2)           | 0.035500  | -0.186000 | 0.25700 | 20.8 | 7.53e-01 | 8.67e-01 |
| ## SM(d34:1)          | -0.008540 | -0.063500 | 0.04650 | 24.9 | 7.61e-01 | 8.67e-01 |
| ## SM(d40:2)          | 0.012200  | -0.080500 | 0.10500 | 23.7 | 7.96e-01 | 8.98e-01 |
| ## PC(40:6)           | 0.016400  | -0.159000 | 0.19200 | 23.9 | 8.54e-01 | 9.53e-01 |
| ## SM(d18:1/24:0)     | -0.009170 | -0.123000 | 0.10500 | 23.6 | 8.74e-01 | 9.66e-01 |
| ## PC(34:1)           | -0.009240 | -0.138000 | 0.11900 | 25.9 | 8.88e-01 | 9.70e-01 |
| ## TG(46:1)           | -0.016800 | -0.275000 | 0.24100 | 21.3 | 8.99e-01 | 9.72e-01 |
| ## TG(18:1/18:1/22:6) | 0.025400  | -0.441000 | 0.49200 | 20.7 | 9.15e-01 | 9.79e-01 |
| ## SM(d38:2)          | -0.004960 | -0.121000 | 0.11100 | 21.3 | 9.33e-01 | 9.80e-01 |
| ## TG(46:2)           | 0.011200  | -0.253000 | 0.27600 | 20.1 | 9.34e-01 | 9.80e-01 |
| ## TG(54:4)           | -0.005690 | -0.173000 | 0.16100 | 21.4 | 9.47e-01 | 9.81e-01 |
| ## TG(16:0/18:0/18:1) | 0.007630  | -0.276000 | 0.29100 | 23.1 | 9.58e-01 | 9.81e-01 |
| ## SM(d33:1)          | -0.002860 | -0.124000 | 0.11800 | 21.3 | 9.63e-01 | 9.81e-01 |
| ## SM(d32:1)          | 0.001890  | -0.110000 | 0.11400 | 22.3 | 9.74e-01 | 9.83e-01 |
| ## TG(49:1)           | -0.000983 | -0.191000 | 0.19000 | 20.9 | 9.92e-01 | 9.92e-01 |

### 1.1.1.2.2 Heatmaps

```
## [1] "map_lipid_names has been created by Tommi Suvitaival"
## [1] "tommi.raimo.leo.suvitaival@regionh.dk"
## [1] "2019-05-06"
```

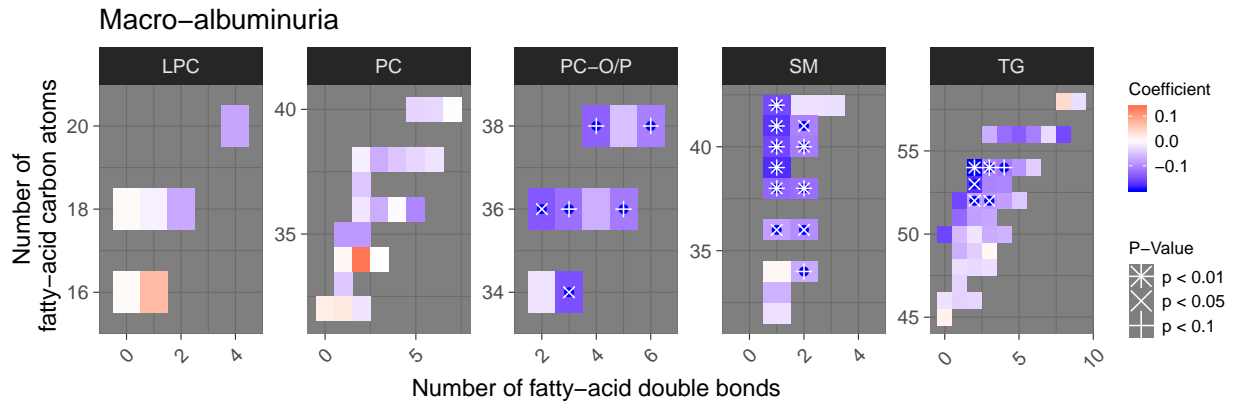

```
## Label Relation p.adj
## 1 # p.adj < 0.01
## 2 x p.adj < 0.05
## 3 * p.adj < 0.10
```

```
## Label Relation p.adj
## 1 # p.adj < 0.01
## 2 x p.adj < 0.05
## 3 * p.adj < 0.10
```

```
## Label Relation p.adj
## 1 # p.adj < 0.01
## 2 x p.adj < 0.05
## 3 * p.adj < 0.10
```

# GroupT1D.Micro

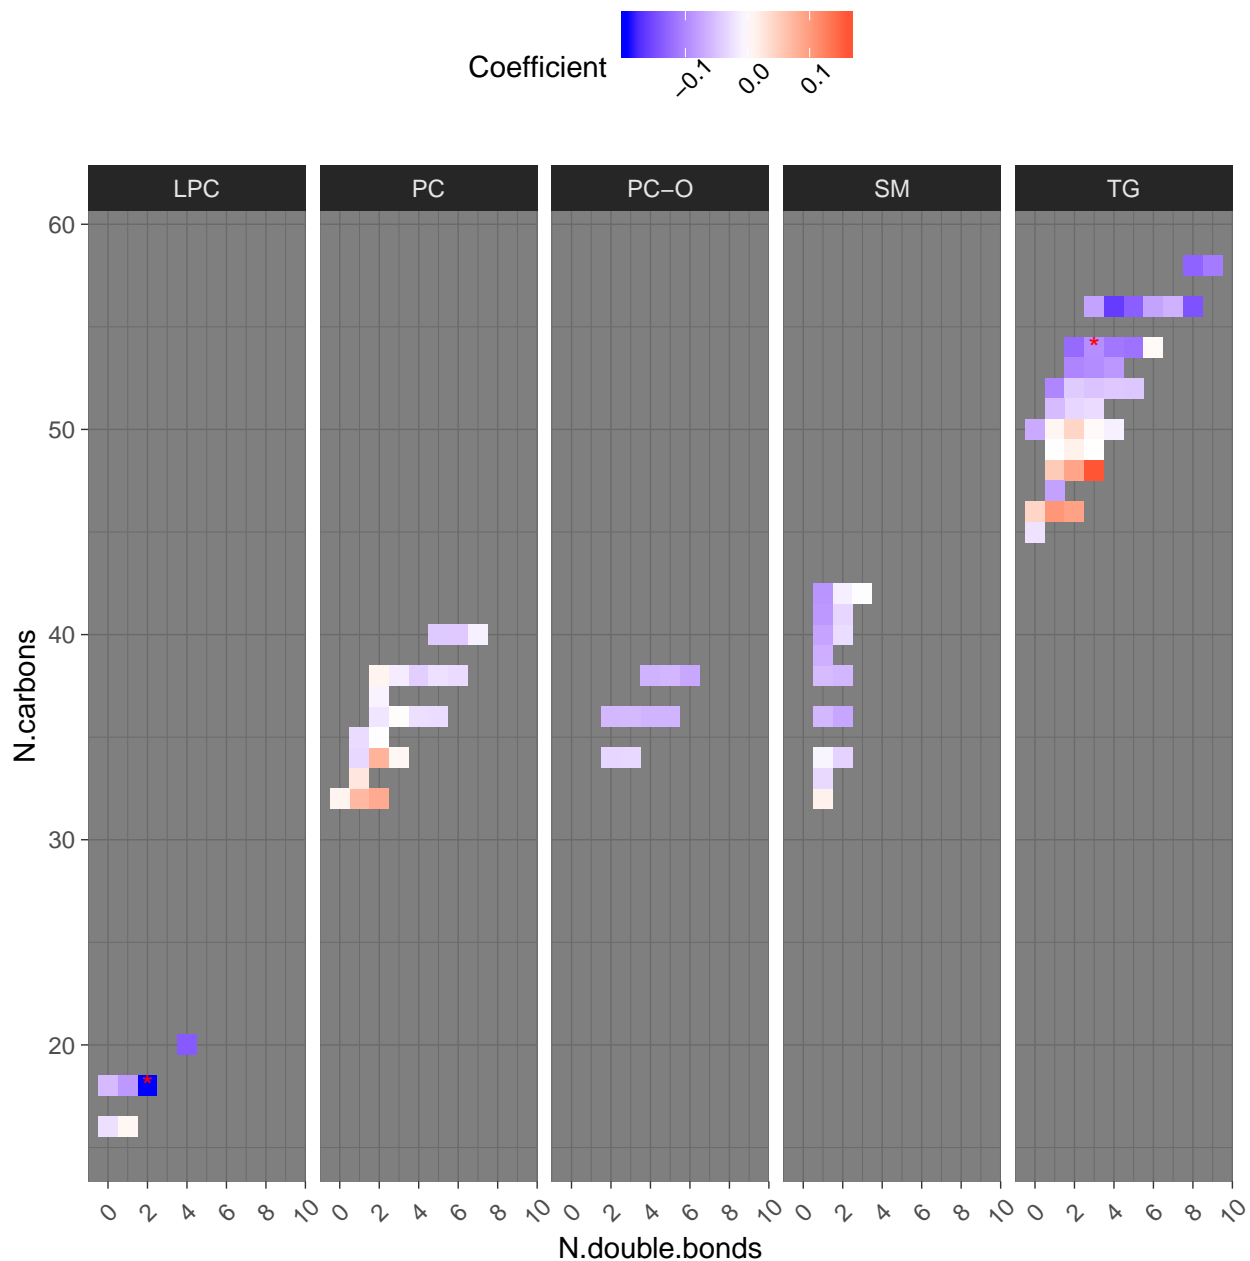

Figure 4: Heatmap of the lipid-specific model coefficients from the adjusted model for albuminuria groups. The name of the group is shown in the title of the figure in the top-left corner. Lipids are organized into panels (columns) by their class (from LPC to TG). One colored rectangle corresponds to one lipid species, where the coordinates in the x-axis and y-axis, respectively, show the number of double bonds (N.double.bonds) and the number of carbon atoms (N.carbons) in the fatty acid chains of the lipid. The number of double bonds corresponds to the number of unsaturated bonds in the fatty acid chains, and the number of carbon atoms corresponds to the length of the fatty acid chains and, thus, the size of the lipid. The magnitude of the lipid-specific model coefficient is shown as the color of the rectangle (blue: negative; red: positive). Coefficient with statistical significance are annotated with symbols #, x and \*, respectively, corresponding to  $p < 0.01$ ,  $p < 0.05$  and  $p < 0.1$ .

# GroupT1D.Macro

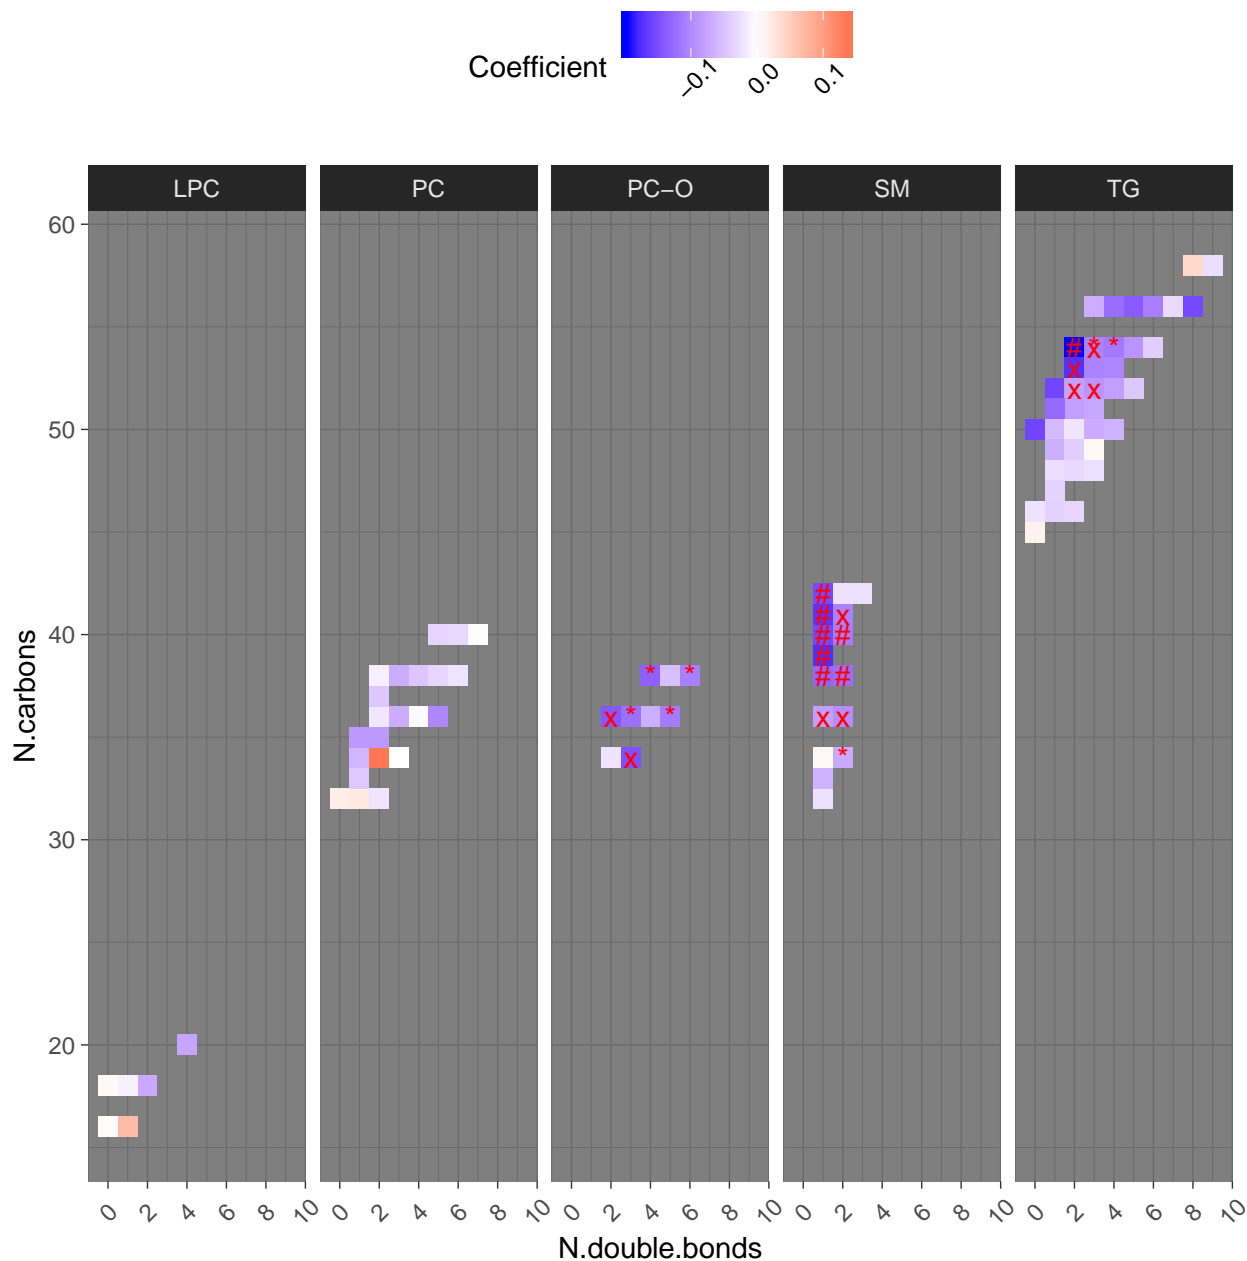

Figure 5: Heatmap of the lipid-specific model coefficients from the adjusted model for albuminuria groups. The name of the group is shown in the title of the figure in the top-left corner. Lipids are organized into panels (columns) by their class (from LPC to TG). One colored rectangle corresponds to one lipid species, where the coordinates in the x-axis and y-axis, respectively, show the number of double bonds (N.double.bonds) and the number of carbon atoms (N.carbons) in the fatty acid chains of the lipid. The number of double bonds corresponds to the number of unsaturated bonds in the fatty acid chains, and the number of carbon atoms corresponds to the length of the fatty acid chains and, thus, the size of the lipid. The magnitude of the lipid-specific model coefficient is shown as the color of the rectangle (blue: negative; red: positive). Coefficient with statistical significance are annotated with symbols #, x and \*, respectively, corresponding to  $p < 0.01$ ,  $p < 0.05$  and  $p < 0.1$ .

# GroupHealthy.Control

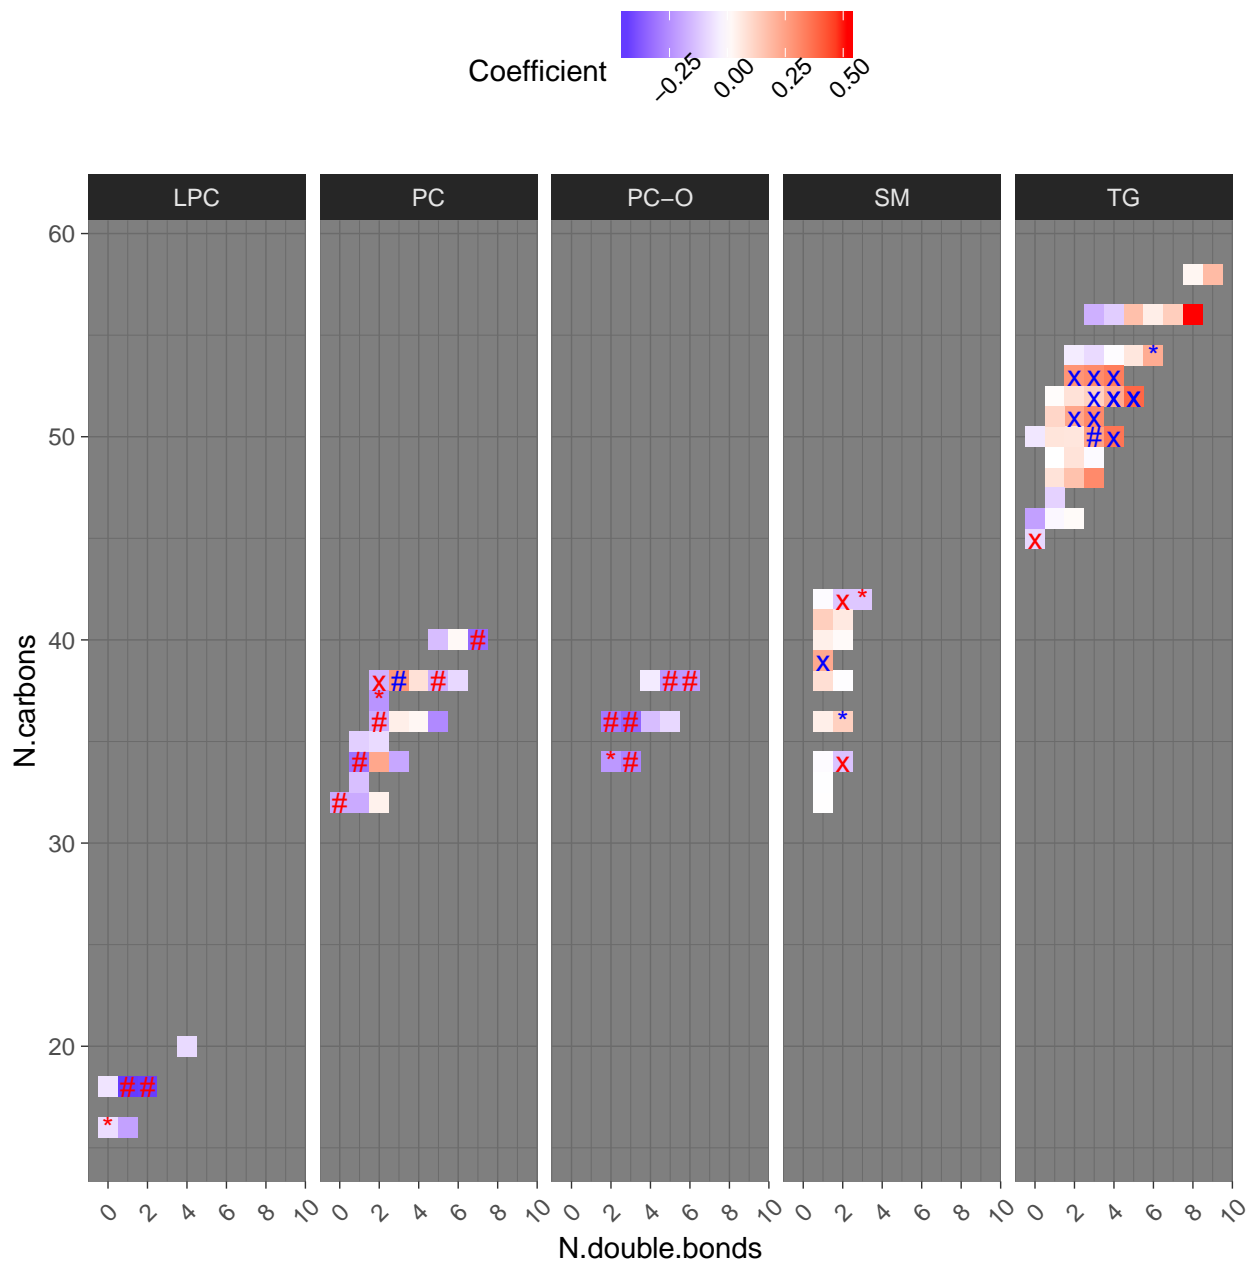

Figure 6: Heatmap of the lipid-specific model coefficients from the adjusted model for albuminuria groups. The name of the group is shown in the title of the figure in the top-left corner. Lipids are organized into panels (columns) by their class (from LPC to TG). One colored rectangle corresponds to one lipid species, where the coordinates in the x-axis and y-axis, respectively, show the number of double bonds (N.double.bonds) and the number of carbon atoms (N.carbons) in the fatty acid chains of the lipid. The number of double bonds corresponds to the number of unsaturated bonds in the fatty acid chains, and the number of carbon atoms corresponds to the length of the fatty acid chains and, thus, the size of the lipid. The magnitude of the lipid-specific model coefficient is shown as the color of the rectangle (blue: negative; red: positive). Coefficient with statistical significance are annotated with symbols #, x and \*, respectively, corresponding to  $p < 0.01$ ,  $p < 0.05$  and  $p < 0.1$ .

## 1.1.2 eGFR

### 1.1.2.1 Crude Model



1.1.2.1.1 Table

```
##
##
## Table: egfr.intervals
##
```

| ## Name               | Coefficient | CI.L      | CI.R      | AveExpr | P.Value  | adj.P.Val |
|-----------------------|-------------|-----------|-----------|---------|----------|-----------|
| ## SM(d18:1/24:0)     | 4.99e-02    | 0.027900  | 0.071800  | 23.5    | 9.50e-06 | 0.00101   |
| ## SM(d36:2)          | -3.95e-02   | -0.057600 | -0.021400 | 21.4    | 2.07e-05 | 0.00110   |
| ## SM(d34:1)          | -1.75e-02   | -0.026800 | -0.008130 | 24.9    | 2.59e-04 | 0.00914   |
| ## SM(d40:1)          | 3.75e-02    | 0.016600  | 0.058400  | 23.9    | 4.63e-04 | 0.01230   |
| ## LPC(18:2)          | 5.60e-02    | 0.024000  | 0.088100  | 24.0    | 6.30e-04 | 0.01340   |
| ## TG(18:0/18:1/20:4) | -8.50e-02   | -0.136000 | -0.034500 | 21.3    | 1.01e-03 | 0.01780   |
| ## PC(38:4)           | -2.52e-02   | -0.040700 | -0.009640 | 25.2    | 1.53e-03 | 0.02320   |
| ## SM(d32:1)          | -3.35e-02   | -0.054500 | -0.012600 | 22.3    | 1.78e-03 | 0.02360   |
| ## SM(d16:1/18:1)     | -2.97e-02   | -0.048800 | -0.010600 | 22.8    | 2.37e-03 | 0.02790   |
| ## PC(32:2)           | 5.74e-02    | 0.019900  | 0.094900  | 20.7    | 2.76e-03 | 0.02930   |
| ## LPC(16:0)          | 1.55e-02    | 0.004800  | 0.026100  | 25.3    | 4.53e-03 | 0.04370   |
| ## PC(0-34:3)         | 3.81e-02    | 0.011300  | 0.064800  | 21.9    | 5.34e-03 | 0.04720   |
| ## TG(54:3)           | -3.88e-02   | -0.066500 | -0.011000 | 21.7    | 6.28e-03 | 0.05120   |
| ## SM(d33:1)          | -2.98e-02   | -0.051500 | -0.008060 | 21.3    | 7.29e-03 | 0.05520   |
| ## SM(d18:2/24:1)     | -2.58e-02   | -0.044800 | -0.006820 | 24.0    | 7.81e-03 | 0.05520   |
| ## TG(53:2)           | -6.54e-02   | -0.115000 | -0.015700 | 20.7    | 1.01e-02 | 0.06670   |
| ## SM(d41:1)          | 3.23e-02    | 0.007470  | 0.057100  | 22.7    | 1.08e-02 | 0.06760   |
| ## TG(52:3)           | -2.53e-02   | -0.047600 | -0.003000 | 22.3    | 2.62e-02 | 0.14700   |
| ## TG(54:4)           | -3.64e-02   | -0.068400 | -0.004300 | 21.4    | 2.63e-02 | 0.14700   |
| ## TG(52:2)           | -2.30e-02   | -0.043900 | -0.002020 | 22.6    | 3.17e-02 | 0.16600   |
| ## TG(53:3)           | -5.03e-02   | -0.097100 | -0.003530 | 20.7    | 3.51e-02 | 0.16600   |
| ## TG(56:3)           | -5.03e-02   | -0.097200 | -0.003300 | 20.0    | 3.60e-02 | 0.16600   |
| ## TG(53:4)           | -5.46e-02   | -0.106000 | -0.003390 | 19.7    | 3.67e-02 | 0.16600   |
| ## TG(18:2/18:1/18:1) | -3.95e-02   | -0.077200 | -0.001880 | 24.4    | 3.96e-02 | 0.16600   |
| ## TG(56:4)           | -5.62e-02   | -0.110000 | -0.002470 | 20.0    | 4.04e-02 | 0.16600   |
| ## TG(52:4)           | -3.46e-02   | -0.067800 | -0.001460 | 21.6    | 4.08e-02 | 0.16600   |
| ## PC(34:2)           | -3.92e-02   | -0.077200 | -0.001170 | 26.0    | 4.34e-02 | 0.17000   |
| ## LPC(18:1)          | 2.42e-02    | 0.000366  | 0.048000  | 23.7    | 4.66e-02 | 0.17600   |
| ## TG(51:2)           | -4.37e-02   | -0.088300 | 0.000787  | 21.6    | 5.42e-02 | 0.19800   |
| ## PC(36:5)           | 4.60e-02    | -0.001160 | 0.093200  | 24.3    | 5.59e-02 | 0.19800   |
| ## TG(54:2)           | -4.29e-02   | -0.088600 | 0.002750  | 23.4    | 6.54e-02 | 0.22400   |
| ## TG(45:0)           | 1.55e-02    | -0.001290 | 0.032300  | 23.1    | 7.03e-02 | 0.23300   |
| ## LPC(16:1)          | 2.76e-02    | -0.003240 | 0.058400  | 20.0    | 7.93e-02 | 0.25500   |
| ## TG(18:1/18:1/18:1) | -3.19e-02   | -0.067900 | 0.004160  | 24.8    | 8.29e-02 | 0.25800   |
| ## TG(56:6)           | -2.72e-02   | -0.058700 | 0.004350  | 19.9    | 9.11e-02 | 0.27300   |
| ## LPC(18:0)          | 1.63e-02    | -0.002830 | 0.035400  | 23.9    | 9.48e-02 | 0.27300   |
| ## TG(18:1/18:1/16:0) | -2.41e-02   | -0.052500 | 0.004360  | 25.6    | 9.68e-02 | 0.27300   |
| ## TG(16:0/22:5/18:1) | -3.28e-02   | -0.071700 | 0.006050  | 22.7    | 9.78e-02 | 0.27300   |
| ## PC(0-36:5)         | 1.84e-02    | -0.003820 | 0.040700  | 22.3    | 1.04e-01 | 0.28300   |
| ## TG(16:0/18:2/18:2) | -3.66e-02   | -0.081400 | 0.008260  | 24.5    | 1.10e-01 | 0.28900   |
| ## PC(34:3)           | 3.43e-02    | -0.007980 | 0.076600  | 22.5    | 1.12e-01 | 0.28900   |
| ## TG(51:3)           | -3.67e-02   | -0.082600 | 0.009220  | 20.7    | 1.17e-01 | 0.29500   |
| ## PC(38:6)           | 1.61e-02    | -0.004440 | 0.036700  | 25.3    | 1.24e-01 | 0.30400   |
| ## SM(d41:2)          | -1.80e-02   | -0.041200 | 0.005090  | 22.5    | 1.26e-01 | 0.30400   |
| ## PC(0-34:2)         | 2.37e-02    | -0.008900 | 0.056300  | 21.5    | 1.54e-01 | 0.36200   |
| ## TG(16:0/18:2/18:3) | -4.74e-02   | -0.114000 | 0.018600  | 22.0    | 1.59e-01 | 0.36700   |

|                       |           |           |          |      |          |         |
|-----------------------|-----------|-----------|----------|------|----------|---------|
| ## PC(32:0)           | 1.01e-02  | -0.004620 | 0.024800 | 22.5 | 1.78e-01 | 0.40300 |
| ## PC(38:2)           | 1.49e-02  | -0.007570 | 0.037300 | 21.2 | 1.94e-01 | 0.42800 |
| ## PC(32:1)           | 2.73e-02  | -0.014500 | 0.069200 | 23.3 | 2.00e-01 | 0.43100 |
| ## TG(50:3)           | -2.68e-02 | -0.068200 | 0.014700 | 23.5 | 2.06e-01 | 0.43100 |
| ## TG(18:2/18:1/16:0) | -1.62e-02 | -0.041700 | 0.009230 | 25.3 | 2.11e-01 | 0.43100 |
| ## TG(52:5)           | -3.37e-02 | -0.087100 | 0.019800 | 19.8 | 2.16e-01 | 0.43100 |
| ## SM(d38:2)          | -1.32e-02 | -0.034100 | 0.007770 | 21.3 | 2.17e-01 | 0.43100 |
| ## SM(d36:1)          | -1.06e-02 | -0.027400 | 0.006320 | 23.4 | 2.20e-01 | 0.43100 |
| ## TG(56:5)           | -2.50e-02 | -0.065200 | 0.015300 | 20.3 | 2.24e-01 | 0.43200 |
| ## TG(54:5)           | -2.39e-02 | -0.063100 | 0.015400 | 20.6 | 2.33e-01 | 0.43600 |
| ## SM(d38:1)          | 1.18e-02  | -0.007730 | 0.031400 | 23.1 | 2.35e-01 | 0.43600 |
| ## TG(18:1/18:2/18:2) | -2.78e-02 | -0.074200 | 0.018500 | 23.6 | 2.39e-01 | 0.43600 |
| ## TG(51:1)           | -2.81e-02 | -0.075600 | 0.019300 | 20.3 | 2.45e-01 | 0.44000 |
| ## SM(d40:2)          | -1.06e-02 | -0.029000 | 0.007800 | 23.7 | 2.58e-01 | 0.45600 |
| ## PC(37:2)           | 1.93e-02  | -0.014700 | 0.053300 | 19.3 | 2.66e-01 | 0.46200 |
| ## TG(14:0/18:1/18:1) | -2.09e-02 | -0.059400 | 0.017600 | 24.4 | 2.87e-01 | 0.49000 |
| ## TG(49:2)           | -1.72e-02 | -0.051400 | 0.016900 | 20.4 | 3.22e-01 | 0.54000 |
| ## TG(49:1)           | -1.90e-02 | -0.056900 | 0.018900 | 20.9 | 3.26e-01 | 0.54000 |
| ## TG(50:2)           | -1.54e-02 | -0.047100 | 0.016300 | 21.1 | 3.40e-01 | 0.55400 |
| ## TG(18:1/18:1/22:6) | 3.08e-02  | -0.044000 | 0.106000 | 20.7 | 4.19e-01 | 0.67300 |
| ## TG(14:0/18:2/18:2) | -2.39e-02 | -0.083300 | 0.035500 | 21.2 | 4.30e-01 | 0.67500 |
| ## TG(56:7)           | -1.43e-02 | -0.050400 | 0.021800 | 19.6 | 4.36e-01 | 0.67500 |
| ## PC(38:5)           | -5.68e-03 | -0.020100 | 0.008740 | 24.6 | 4.39e-01 | 0.67500 |
| ## PC(0-38:5)         | -7.79e-03 | -0.027800 | 0.012300 | 22.8 | 4.46e-01 | 0.67500 |
| ## PC(0-36:4)         | 8.91e-03  | -0.014800 | 0.032600 | 22.9 | 4.61e-01 | 0.68900 |
| ## TG(46:0)           | 1.66e-02  | -0.030300 | 0.063500 | 20.4 | 4.88e-01 | 0.70800 |
| ## PC(0-36:3)         | 1.00e-02  | -0.018400 | 0.038400 | 20.4 | 4.88e-01 | 0.70800 |
| ## PC(35:1)           | -8.50e-03 | -0.033700 | 0.016700 | 21.8 | 5.08e-01 | 0.72700 |
| ## TG(50:1)           | -1.63e-02 | -0.066100 | 0.033400 | 24.3 | 5.19e-01 | 0.72700 |
| ## TG(47:1)           | -1.33e-02 | -0.054100 | 0.027500 | 19.6 | 5.21e-01 | 0.72700 |
| ## LPC(20:4)          | 9.80e-03  | -0.021700 | 0.041300 | 21.4 | 5.41e-01 | 0.74500 |
| ## PC(33:1)           | 8.44e-03  | -0.021000 | 0.037900 | 20.9 | 5.74e-01 | 0.78000 |
| ## TG(16:0/18:0/18:1) | -1.75e-02 | -0.080000 | 0.045100 | 23.1 | 5.84e-01 | 0.78300 |
| ## PC(34:1)           | -4.92e-03 | -0.024400 | 0.014600 | 26.0 | 6.20e-01 | 0.82200 |
| ## PC(40:6)           | 7.53e-03  | -0.023500 | 0.038500 | 23.9 | 6.33e-01 | 0.82900 |
| ## PC(36:3)           | 5.14e-03  | -0.017800 | 0.028000 | 25.6 | 6.60e-01 | 0.85300 |
| ## TG(58:9)           | 1.56e-02  | -0.058800 | 0.090000 | 19.9 | 6.81e-01 | 0.86900 |
| ## TG(16:0/18:2/22:6) | 1.68e-02  | -0.065700 | 0.099300 | 21.0 | 6.90e-01 | 0.87100 |
| ## PC(0-38:6)         | 4.03e-03  | -0.017900 | 0.026000 | 20.4 | 7.18e-01 | 0.89600 |
| ## SM(d39:1)          | 4.24e-03  | -0.024600 | 0.033100 | 21.1 | 7.73e-01 | 0.94500 |
| ## PC(16:0e/18:1(9Z)) | -3.23e-03 | -0.025500 | 0.019000 | 21.8 | 7.75e-01 | 0.94500 |
| ## PC(36:2)           | 1.82e-03  | -0.012500 | 0.016100 | 26.1 | 8.02e-01 | 0.94900 |
| ## TG(54:6)           | -6.60e-03 | -0.059300 | 0.046100 | 19.5 | 8.06e-01 | 0.94900 |
| ## TG(18:1/12:0/18:1) | -6.27e-03 | -0.056300 | 0.043800 | 22.5 | 8.06e-01 | 0.94900 |
| ## TG(48:3)           | -7.66e-03 | -0.074700 | 0.059400 | 20.5 | 8.23e-01 | 0.95500 |
| ## TG(46:2)           | -5.66e-03 | -0.059000 | 0.047700 | 20.1 | 8.35e-01 | 0.95500 |
| ## PC(0-36:2)         | -2.65e-03 | -0.028100 | 0.022800 | 20.5 | 8.38e-01 | 0.95500 |
| ## PC(40:5)           | 2.60e-03  | -0.024500 | 0.029700 | 22.0 | 8.50e-01 | 0.95900 |
| ## PC(40:7)           | 2.19e-03  | -0.028100 | 0.032400 | 21.4 | 8.87e-01 | 0.98700 |
| ## TG(14:0/16:0/18:1) | 3.42e-03  | -0.046800 | 0.053700 | 22.8 | 8.94e-01 | 0.98700 |
| ## PC(0-38:4)         | -1.34e-03 | -0.028000 | 0.025400 | 21.7 | 9.22e-01 | 0.99900 |
| ## TG(50:0)           | -1.95e-03 | -0.058700 | 0.054800 | 20.8 | 9.46e-01 | 0.99900 |
| ## SM(42:2)           | -4.21e-04 | -0.016800 | 0.016000 | 25.2 | 9.60e-01 | 0.99900 |
| ## PC(35:2)           | -6.49e-04 | -0.027700 | 0.026400 | 21.8 | 9.63e-01 | 0.99900 |

```

## PC(38:3)          -5.76e-04  -0.025300  0.024100  24.0  9.63e-01  0.99900
## TG(49:3)          -4.00e-05  -0.005670  0.005590  20.7  9.89e-01  0.99900
## PC(36:4)          6.80e-05  -0.012600  0.012700  25.9  9.92e-01  0.99900
## TG(46:1)          2.32e-04  -0.049500  0.050000  21.3  9.93e-01  0.99900
## TG(18:2/22:5/16:0) -2.18e-04  -0.064100  0.063700  22.1  9.95e-01  0.99900
## TG(18:2/18:2/18:2) 2.08e-05  -0.051000  0.051000  22.1  9.99e-01  0.99900

```

```

##
##

```

```

## Table: Results of the crude model for eGFR variable.
## Shown in the table are name of the lipid (Name),
## model coefficient (Coefficient),
## its lower and upper confidence intervals (CI.L, CL.R),
## average value of the variable (AveExpr),
## p-value of the coefficient (P.Value) and
## the p-value after correction for multiple testing (adj.P.Val).
## The rows of the table are shown in an increasing order by the respective p-value.

```

```

##
## Name          Coefficient      CI.L      CI.R      AveExpr      P.Value      adj.P.Val
## -----
## SM(d18:1/24:0) 4.99e-02  0.027900  0.071800  23.5  9.50e-06  0.00101
## SM(d36:2)      -3.95e-02 -0.057600 -0.021400  21.4  2.07e-05  0.00110
## SM(d34:1)      -1.75e-02 -0.026800 -0.008130  24.9  2.59e-04  0.00914
## SM(d40:1)      3.75e-02  0.016600  0.058400  23.9  4.63e-04  0.01230
## LPC(18:2)      5.60e-02  0.024000  0.088100  24.0  6.30e-04  0.01340
## TG(18:0/18:1/20:4) -8.50e-02 -0.136000 -0.034500  21.3  1.01e-03  0.01780
## PC(38:4)      -2.52e-02 -0.040700 -0.009640  25.2  1.53e-03  0.02320
## SM(d32:1)      -3.35e-02 -0.054500 -0.012600  22.3  1.78e-03  0.02360
## SM(d16:1/18:1) -2.97e-02 -0.048800 -0.010600  22.8  2.37e-03  0.02790
## PC(32:2)      5.74e-02  0.019900  0.094900  20.7  2.76e-03  0.02930
## LPC(16:0)      1.55e-02  0.004800  0.026100  25.3  4.53e-03  0.04370
## PC(0-34:3)    3.81e-02  0.011300  0.064800  21.9  5.34e-03  0.04720
## TG(54:3)      -3.88e-02 -0.066500 -0.011000  21.7  6.28e-03  0.05120
## SM(d33:1)      -2.98e-02 -0.051500 -0.008060  21.3  7.29e-03  0.05520
## SM(d18:2/24:1) -2.58e-02 -0.044800 -0.006820  24.0  7.81e-03  0.05520
## TG(53:2)      -6.54e-02 -0.115000 -0.015700  20.7  1.01e-02  0.06670
## SM(d41:1)      3.23e-02  0.007470  0.057100  22.7  1.08e-02  0.06760
## TG(52:3)      -2.53e-02 -0.047600 -0.003000  22.3  2.62e-02  0.14700
## TG(54:4)      -3.64e-02 -0.068400 -0.004300  21.4  2.63e-02  0.14700
## TG(52:2)      -2.30e-02 -0.043900 -0.002020  22.6  3.17e-02  0.16600
## TG(53:3)      -5.03e-02 -0.097100 -0.003530  20.7  3.51e-02  0.16600
## TG(56:3)      -5.03e-02 -0.097200 -0.003300  20.0  3.60e-02  0.16600
## TG(53:4)      -5.46e-02 -0.106000 -0.003390  19.7  3.67e-02  0.16600
## TG(18:2/18:1/18:1) -3.95e-02 -0.077200 -0.001880  24.4  3.96e-02  0.16600
## TG(56:4)      -5.62e-02 -0.110000 -0.002470  20.0  4.04e-02  0.16600
## TG(52:4)      -3.46e-02 -0.067800 -0.001460  21.6  4.08e-02  0.16600
## PC(34:2)      -3.92e-02 -0.077200 -0.001170  26.0  4.34e-02  0.17000
## LPC(18:1)      2.42e-02  0.000366  0.048000  23.7  4.66e-02  0.17600
## TG(51:2)      -4.37e-02 -0.088300  0.000787  21.6  5.42e-02  0.19800
## PC(36:5)      4.60e-02 -0.001160  0.093200  24.3  5.59e-02  0.19800
## TG(54:2)      -4.29e-02 -0.088600  0.002750  23.4  6.54e-02  0.22400
## TG(45:0)      1.55e-02 -0.001290  0.032300  23.1  7.03e-02  0.23300
## LPC(16:1)      2.76e-02 -0.003240  0.058400  20.0  7.93e-02  0.25500
## TG(18:1/18:1/18:1) -3.19e-02 -0.067900  0.004160  24.8  8.29e-02  0.25800
## TG(56:6)      -2.72e-02 -0.058700  0.004350  19.9  9.11e-02  0.27300

```

|                       |           |           |          |      |          |         |
|-----------------------|-----------|-----------|----------|------|----------|---------|
| ## LPC(18:0)          | 1.63e-02  | -0.002830 | 0.035400 | 23.9 | 9.48e-02 | 0.27300 |
| ## TG(18:1/18:1/16:0) | -2.41e-02 | -0.052500 | 0.004360 | 25.6 | 9.68e-02 | 0.27300 |
| ## TG(16:0/22:5/18:1) | -3.28e-02 | -0.071700 | 0.006050 | 22.7 | 9.78e-02 | 0.27300 |
| ## PC(0-36:5)         | 1.84e-02  | -0.003820 | 0.040700 | 22.3 | 1.04e-01 | 0.28300 |
| ## TG(16:0/18:2/18:2) | -3.66e-02 | -0.081400 | 0.008260 | 24.5 | 1.10e-01 | 0.28900 |
| ## PC(34:3)           | 3.43e-02  | -0.007980 | 0.076600 | 22.5 | 1.12e-01 | 0.28900 |
| ## TG(51:3)           | -3.67e-02 | -0.082600 | 0.009220 | 20.7 | 1.17e-01 | 0.29500 |
| ## PC(38:6)           | 1.61e-02  | -0.004440 | 0.036700 | 25.3 | 1.24e-01 | 0.30400 |
| ## SM(d41:2)          | -1.80e-02 | -0.041200 | 0.005090 | 22.5 | 1.26e-01 | 0.30400 |
| ## PC(0-34:2)         | 2.37e-02  | -0.008900 | 0.056300 | 21.5 | 1.54e-01 | 0.36200 |
| ## TG(16:0/18:2/18:3) | -4.74e-02 | -0.114000 | 0.018600 | 22.0 | 1.59e-01 | 0.36700 |
| ## PC(32:0)           | 1.01e-02  | -0.004620 | 0.024800 | 22.5 | 1.78e-01 | 0.40300 |
| ## PC(38:2)           | 1.49e-02  | -0.007570 | 0.037300 | 21.2 | 1.94e-01 | 0.42800 |
| ## PC(32:1)           | 2.73e-02  | -0.014500 | 0.069200 | 23.3 | 2.00e-01 | 0.43100 |
| ## TG(50:3)           | -2.68e-02 | -0.068200 | 0.014700 | 23.5 | 2.06e-01 | 0.43100 |
| ## TG(18:2/18:1/16:0) | -1.62e-02 | -0.041700 | 0.009230 | 25.3 | 2.11e-01 | 0.43100 |
| ## TG(52:5)           | -3.37e-02 | -0.087100 | 0.019800 | 19.8 | 2.16e-01 | 0.43100 |
| ## SM(d38:2)          | -1.32e-02 | -0.034100 | 0.007770 | 21.3 | 2.17e-01 | 0.43100 |
| ## SM(d36:1)          | -1.06e-02 | -0.027400 | 0.006320 | 23.4 | 2.20e-01 | 0.43100 |
| ## TG(56:5)           | -2.50e-02 | -0.065200 | 0.015300 | 20.3 | 2.24e-01 | 0.43200 |
| ## TG(54:5)           | -2.39e-02 | -0.063100 | 0.015400 | 20.6 | 2.33e-01 | 0.43600 |
| ## SM(d38:1)          | 1.18e-02  | -0.007730 | 0.031400 | 23.1 | 2.35e-01 | 0.43600 |
| ## TG(18:1/18:2/18:2) | -2.78e-02 | -0.074200 | 0.018500 | 23.6 | 2.39e-01 | 0.43600 |
| ## TG(51:1)           | -2.81e-02 | -0.075600 | 0.019300 | 20.3 | 2.45e-01 | 0.44000 |
| ## SM(d40:2)          | -1.06e-02 | -0.029000 | 0.007800 | 23.7 | 2.58e-01 | 0.45600 |
| ## PC(37:2)           | 1.93e-02  | -0.014700 | 0.053300 | 19.3 | 2.66e-01 | 0.46200 |
| ## TG(14:0/18:1/18:1) | -2.09e-02 | -0.059400 | 0.017600 | 24.4 | 2.87e-01 | 0.49000 |
| ## TG(49:2)           | -1.72e-02 | -0.051400 | 0.016900 | 20.4 | 3.22e-01 | 0.54000 |
| ## TG(49:1)           | -1.90e-02 | -0.056900 | 0.018900 | 20.9 | 3.26e-01 | 0.54000 |
| ## TG(50:2)           | -1.54e-02 | -0.047100 | 0.016300 | 21.1 | 3.40e-01 | 0.55400 |
| ## TG(18:1/18:1/22:6) | 3.08e-02  | -0.044000 | 0.106000 | 20.7 | 4.19e-01 | 0.67300 |
| ## TG(14:0/18:2/18:2) | -2.39e-02 | -0.083300 | 0.035500 | 21.2 | 4.30e-01 | 0.67500 |
| ## TG(56:7)           | -1.43e-02 | -0.050400 | 0.021800 | 19.6 | 4.36e-01 | 0.67500 |
| ## PC(38:5)           | -5.68e-03 | -0.020100 | 0.008740 | 24.6 | 4.39e-01 | 0.67500 |
| ## PC(0-38:5)         | -7.79e-03 | -0.027800 | 0.012300 | 22.8 | 4.46e-01 | 0.67500 |
| ## PC(0-36:4)         | 8.91e-03  | -0.014800 | 0.032600 | 22.9 | 4.61e-01 | 0.68900 |
| ## TG(46:0)           | 1.66e-02  | -0.030300 | 0.063500 | 20.4 | 4.88e-01 | 0.70800 |
| ## PC(0-36:3)         | 1.00e-02  | -0.018400 | 0.038400 | 20.4 | 4.88e-01 | 0.70800 |
| ## PC(35:1)           | -8.50e-03 | -0.033700 | 0.016700 | 21.8 | 5.08e-01 | 0.72700 |
| ## TG(50:1)           | -1.63e-02 | -0.066100 | 0.033400 | 24.3 | 5.19e-01 | 0.72700 |
| ## TG(47:1)           | -1.33e-02 | -0.054100 | 0.027500 | 19.6 | 5.21e-01 | 0.72700 |
| ## LPC(20:4)          | 9.80e-03  | -0.021700 | 0.041300 | 21.4 | 5.41e-01 | 0.74500 |
| ## PC(33:1)           | 8.44e-03  | -0.021000 | 0.037900 | 20.9 | 5.74e-01 | 0.78000 |
| ## TG(16:0/18:0/18:1) | -1.75e-02 | -0.080000 | 0.045100 | 23.1 | 5.84e-01 | 0.78300 |
| ## PC(34:1)           | -4.92e-03 | -0.024400 | 0.014600 | 26.0 | 6.20e-01 | 0.82200 |
| ## PC(40:6)           | 7.53e-03  | -0.023500 | 0.038500 | 23.9 | 6.33e-01 | 0.82900 |
| ## PC(36:3)           | 5.14e-03  | -0.017800 | 0.028000 | 25.6 | 6.60e-01 | 0.85300 |
| ## TG(58:9)           | 1.56e-02  | -0.058800 | 0.090000 | 19.9 | 6.81e-01 | 0.86900 |
| ## TG(16:0/18:2/22:6) | 1.68e-02  | -0.065700 | 0.099300 | 21.0 | 6.90e-01 | 0.87100 |
| ## PC(0-38:6)         | 4.03e-03  | -0.017900 | 0.026000 | 20.4 | 7.18e-01 | 0.89600 |
| ## SM(d39:1)          | 4.24e-03  | -0.024600 | 0.033100 | 21.1 | 7.73e-01 | 0.94500 |
| ## PC(16:0e/18:1(9Z)) | -3.23e-03 | -0.025500 | 0.019000 | 21.8 | 7.75e-01 | 0.94500 |
| ## PC(36:2)           | 1.82e-03  | -0.012500 | 0.016100 | 26.1 | 8.02e-01 | 0.94900 |
| ## TG(54:6)           | -6.60e-03 | -0.059300 | 0.046100 | 19.5 | 8.06e-01 | 0.94900 |

|                       |           |           |          |      |          |         |
|-----------------------|-----------|-----------|----------|------|----------|---------|
| ## TG(18:1/12:0/18:1) | -6.27e-03 | -0.056300 | 0.043800 | 22.5 | 8.06e-01 | 0.94900 |
| ## TG(48:3)           | -7.66e-03 | -0.074700 | 0.059400 | 20.5 | 8.23e-01 | 0.95500 |
| ## TG(46:2)           | -5.66e-03 | -0.059000 | 0.047700 | 20.1 | 8.35e-01 | 0.95500 |
| ## PC(0-36:2)         | -2.65e-03 | -0.028100 | 0.022800 | 20.5 | 8.38e-01 | 0.95500 |
| ## PC(40:5)           | 2.60e-03  | -0.024500 | 0.029700 | 22.0 | 8.50e-01 | 0.95900 |
| ## PC(40:7)           | 2.19e-03  | -0.028100 | 0.032400 | 21.4 | 8.87e-01 | 0.98700 |
| ## TG(14:0/16:0/18:1) | 3.42e-03  | -0.046800 | 0.053700 | 22.8 | 8.94e-01 | 0.98700 |
| ## PC(0-38:4)         | -1.34e-03 | -0.028000 | 0.025400 | 21.7 | 9.22e-01 | 0.99900 |
| ## TG(50:0)           | -1.95e-03 | -0.058700 | 0.054800 | 20.8 | 9.46e-01 | 0.99900 |
| ## SM(42:2)           | -4.21e-04 | -0.016800 | 0.016000 | 25.2 | 9.60e-01 | 0.99900 |
| ## PC(35:2)           | -6.49e-04 | -0.027700 | 0.026400 | 21.8 | 9.63e-01 | 0.99900 |
| ## PC(38:3)           | -5.76e-04 | -0.025300 | 0.024100 | 24.0 | 9.63e-01 | 0.99900 |
| ## TG(49:3)           | -4.00e-05 | -0.005670 | 0.005590 | 20.7 | 9.89e-01 | 0.99900 |
| ## PC(36:4)           | 6.80e-05  | -0.012600 | 0.012700 | 25.9 | 9.92e-01 | 0.99900 |
| ## TG(46:1)           | 2.32e-04  | -0.049500 | 0.050000 | 21.3 | 9.93e-01 | 0.99900 |
| ## TG(18:2/22:5/16:0) | -2.18e-04 | -0.064100 | 0.063700 | 22.1 | 9.95e-01 | 0.99900 |
| ## TG(18:2/18:2/18:2) | 2.08e-05  | -0.051000 | 0.051000 | 22.1 | 9.99e-01 | 0.99900 |

### 1.1.2.1.2 Heatmaps

```
## Label Relation p.adj
## 1 # p.adj < 0.01
## 2 x p.adj < 0.05
## 3 * p.adj < 0.10
```

egfr.intervals

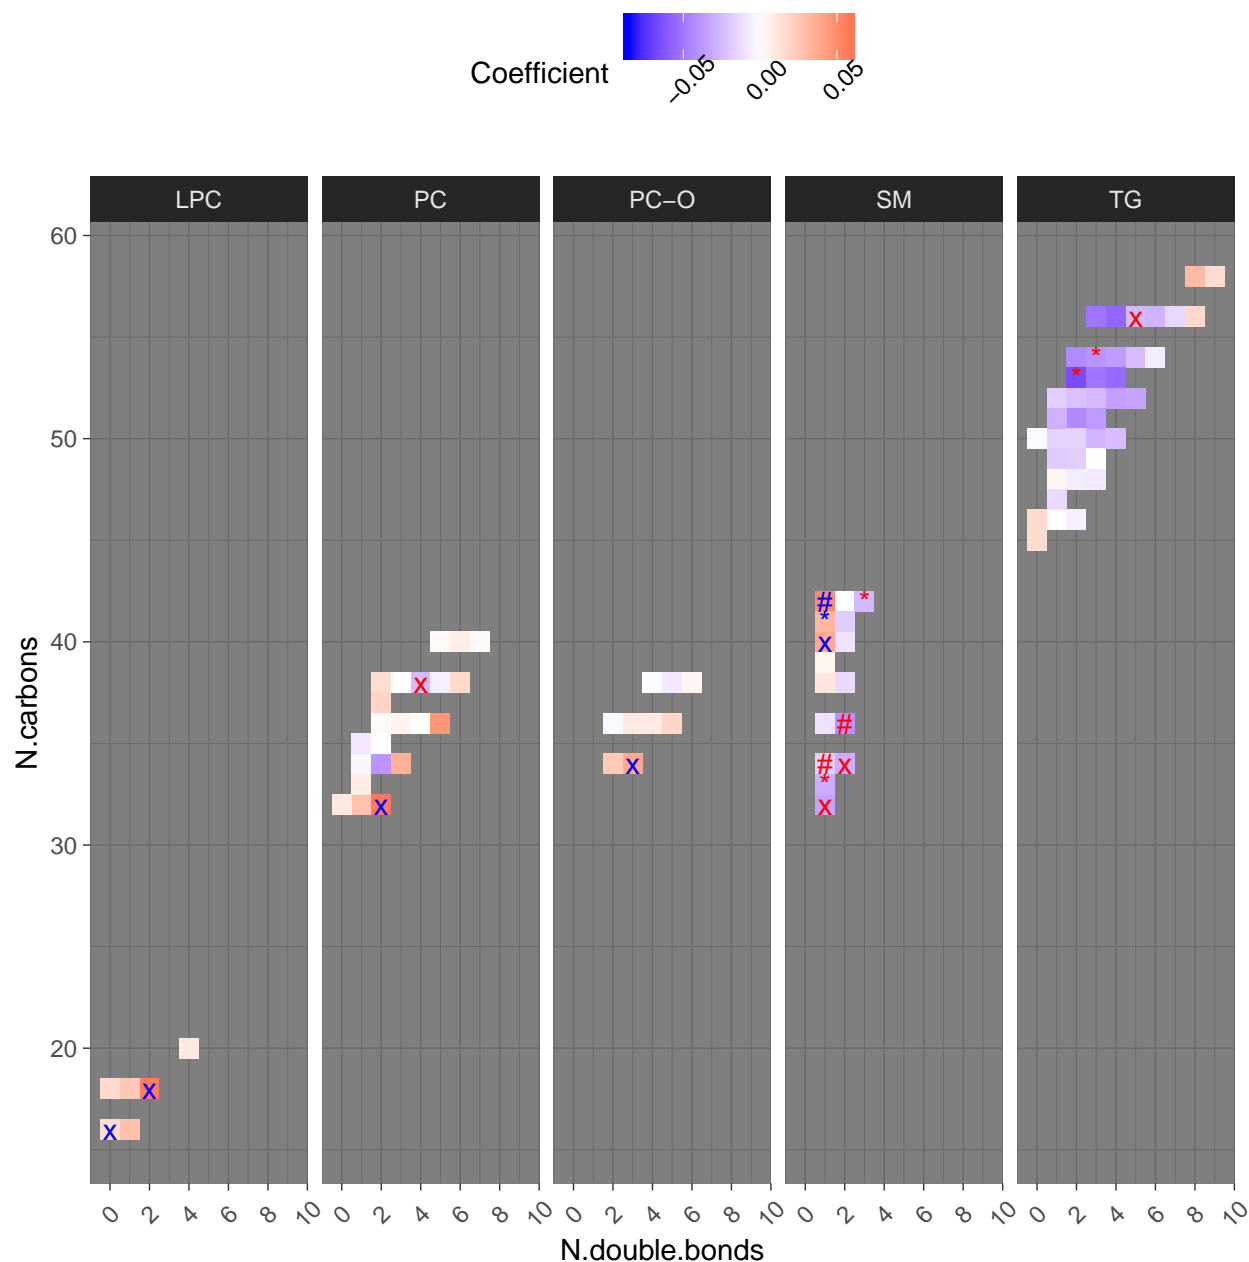

Figure 7: Heatmap of the lipid-specific model coefficients from the crude model for eGFR. Lipids are organized into panels (columns) by their class (from LPC to TG). One colored rectangle corresponds to one lipid species, where the coordinates in the x-axis and y-axis, respectively, show the number of double bonds (N.double.bonds) and the number of carbon atoms (N.carbons) in the fatty acid chains of the lipid. The number of double bonds corresponds to the number of unsaturated bonds in the fatty acid chains, and the number of carbon atoms corresponds to the length of the fatty acid chains and, thus, the size of the lipid. The magnitude of the lipid-specific model coefficient is shown as the color of the rectangle (blue: negative; red: positive). Coefficient with statistical significance are annotated with symbols #, x and \*, respectively, corresponding to  $p < 0.01$ ,  $p < 0.05$  and  $p < 0.1$ .

### 1.1.2.2 Adjusted Model



### 1.1.2.2.1 Table

```
##
##
## Table: Results of the adjusted model for eGFR variable.
## Shown in the table are name of the lipid (Name),
## model coefficient (Coefficient),
## its lower and upper confidence intervals (CI.L, CL.R),
## average value of the variable (AveExpr),
## p-value of the coefficient (P.Value) and
## the p-value after correction for multiple testing (adj.P.Val).
## The rows of the table are shown in an increasing order by the respective p-value.
##
```

| ## Name               | Coefficient | CI.L      | CI.R      | AveExpr | P.Value  | adj.P.Val |
|-----------------------|-------------|-----------|-----------|---------|----------|-----------|
| ## PC(36:5)           | 0.106000    | 0.059400  | 0.153000  | 24.3    | 1.05e-05 | 0.00112   |
| ## PC(38:6)           | 0.041800    | 0.021400  | 0.062100  | 25.3    | 6.17e-05 | 0.00327   |
| ## TG(18:1/18:1/22:6) | 0.154000    | 0.075800  | 0.233000  | 20.7    | 1.25e-04 | 0.00442   |
| ## SM(d34:1)          | -0.017800   | -0.027300 | -0.008350 | 24.9    | 2.39e-04 | 0.00633   |
| ## PC(40:6)           | 0.053700    | 0.023800  | 0.083600  | 23.9    | 4.49e-04 | 0.00951   |
| ## SM(d33:1)          | -0.035100   | -0.056200 | -0.014000 | 21.3    | 1.16e-03 | 0.01920   |
| ## TG(18:2/18:2/18:2) | 0.074600    | 0.029400  | 0.120000  | 22.1    | 1.27e-03 | 0.01920   |
| ## PC(32:2)           | 0.058400    | 0.020400  | 0.096500  | 20.7    | 2.66e-03 | 0.03070   |
| ## TG(18:2/22:5/16:0) | 0.095600    | 0.033200  | 0.158000  | 22.1    | 2.74e-03 | 0.03070   |
| ## TG(16:0/18:2/22:6) | 0.128000    | 0.043500  | 0.213000  | 21.0    | 3.08e-03 | 0.03070   |
| ## SM(d16:1/18:1)     | -0.023000   | -0.038300 | -0.007750 | 22.8    | 3.19e-03 | 0.03070   |
| ## TG(58:9)           | 0.117000    | 0.036800  | 0.196000  | 19.9    | 4.25e-03 | 0.03760   |
| ## PC(0-36:2)         | -0.037000   | -0.062700 | -0.011300 | 20.5    | 4.81e-03 | 0.03920   |
| ## PC(32:1)           | 0.061200    | 0.018300  | 0.104000  | 23.3    | 5.24e-03 | 0.03960   |
| ## LPC(16:1)          | 0.046500    | 0.012800  | 0.080300  | 20.0    | 6.91e-03 | 0.04880   |
| ## PC(40:7)           | 0.040600    | 0.010600  | 0.070600  | 21.4    | 8.02e-03 | 0.05320   |
| ## TG(14:0/16:0/18:1) | 0.052500    | 0.013200  | 0.091800  | 22.8    | 8.93e-03 | 0.05570   |
| ## PC(0-38:4)         | -0.037400   | -0.066500 | -0.008220 | 21.7    | 1.21e-02 | 0.07030   |
| ## SM(d18:2/24:1)     | -0.022500   | -0.040300 | -0.004800 | 24.0    | 1.28e-02 | 0.07030   |
| ## SM(d32:1)          | -0.024700   | -0.044300 | -0.005180 | 22.3    | 1.33e-02 | 0.07030   |
| ## LPC(16:0)          | 0.013100    | 0.002090  | 0.024100  | 25.3    | 1.98e-02 | 0.09980   |
| ## TG(46:0)           | 0.049100    | 0.006210  | 0.091900  | 20.4    | 2.49e-02 | 0.12000   |
| ## PC(40:5)           | 0.029400    | 0.003180  | 0.055700  | 22.0    | 2.81e-02 | 0.12500   |
| ## PC(0-38:5)         | -0.024600   | -0.046600 | -0.002610 | 22.8    | 2.84e-02 | 0.12500   |
| ## TG(18:1/12:0/18:1) | 0.040200    | 0.002350  | 0.078100  | 22.5    | 3.74e-02 | 0.15200   |
| ## TG(54:3)           | -0.022600   | -0.044000 | -0.001290 | 21.7    | 3.77e-02 | 0.15200   |
| ## SM(d36:2)          | -0.018800   | -0.036600 | -0.000984 | 21.4    | 3.86e-02 | 0.15200   |
| ## SM(d41:2)          | -0.022700   | -0.044600 | -0.000879 | 22.5    | 4.15e-02 | 0.15700   |
| ## PC(16:0e/18:1(9Z)) | -0.022100   | -0.043700 | -0.000456 | 21.8    | 4.54e-02 | 0.16600   |
| ## TG(54:6)           | 0.049500    | 0.000222  | 0.098800  | 19.5    | 4.90e-02 | 0.17300   |
| ## SM(d40:2)          | -0.015800   | -0.032000 | 0.000265  | 23.7    | 5.39e-02 | 0.17700   |
| ## TG(54:4)           | -0.027900   | -0.056300 | 0.000512  | 21.4    | 5.43e-02 | 0.17700   |
| ## SM(d18:1/24:0)     | 0.019000    | -0.000487 | 0.038500  | 23.5    | 5.60e-02 | 0.17700   |
| ## TG(14:0/18:2/18:2) | 0.041000    | -0.001180 | 0.083200  | 21.2    | 5.67e-02 | 0.17700   |
| ## TG(49:3)           | -0.004000   | -0.008450 | 0.000451  | 20.7    | 7.81e-02 | 0.23700   |
| ## PC(38:4)           | -0.014600   | -0.030900 | 0.001830  | 25.2    | 8.15e-02 | 0.24000   |
| ## TG(48:3)           | 0.048200    | -0.006770 | 0.103000  | 20.5    | 8.56e-02 | 0.24500   |
| ## TG(46:2)           | 0.037200    | -0.007500 | 0.081800  | 20.1    | 1.03e-01 | 0.27800   |
| ## TG(14:0/18:1/18:1) | 0.020600    | -0.004450 | 0.045700  | 24.4    | 1.07e-01 | 0.27800   |

|                       |           |           |          |      |          |         |
|-----------------------|-----------|-----------|----------|------|----------|---------|
| ## TG(50:2)           | 0.017400  | -0.003920 | 0.038800 | 21.1 | 1.09e-01 | 0.27800 |
| ## PC(38:2)           | 0.017700  | -0.003980 | 0.039300 | 21.2 | 1.10e-01 | 0.27800 |
| ## PC(0-36:3)         | -0.021900 | -0.048800 | 0.004980 | 20.4 | 1.10e-01 | 0.27800 |
| ## TG(50:3)           | 0.019400  | -0.004770 | 0.043500 | 23.5 | 1.16e-01 | 0.28500 |
| ## TG(18:0/18:1/20:4) | -0.037700 | -0.087500 | 0.012200 | 21.3 | 1.39e-01 | 0.33400 |
| ## TG(56:7)           | 0.026500  | -0.009270 | 0.062300 | 19.6 | 1.46e-01 | 0.34000 |
| ## TG(46:1)           | 0.032600  | -0.011600 | 0.076800 | 21.3 | 1.48e-01 | 0.34000 |
| ## TG(52:4)           | -0.019100 | -0.045500 | 0.007360 | 21.6 | 1.57e-01 | 0.35100 |
| ## TG(52:3)           | -0.011900 | -0.028500 | 0.004680 | 22.3 | 1.59e-01 | 0.35100 |
| ## TG(50:1)           | 0.025900  | -0.012800 | 0.064500 | 24.3 | 1.89e-01 | 0.40300 |
| ## TG(18:2/18:1/18:1) | -0.021700 | -0.054300 | 0.011000 | 24.4 | 1.93e-01 | 0.40300 |
| ## PC(32:0)           | 0.009630  | -0.005010 | 0.024300 | 22.5 | 1.97e-01 | 0.40300 |
| ## PC(36:2)           | -0.010600 | -0.026900 | 0.005590 | 26.1 | 1.99e-01 | 0.40300 |
| ## TG(50:0)           | 0.032100  | -0.017200 | 0.081300 | 20.8 | 2.02e-01 | 0.40300 |
| ## PC(35:2)           | -0.017800 | -0.045800 | 0.010200 | 21.8 | 2.13e-01 | 0.41900 |
| ## TG(16:0/18:0/18:1) | 0.030600  | -0.018400 | 0.079700 | 23.1 | 2.21e-01 | 0.42600 |
| ## PC(0-34:2)         | -0.019400 | -0.053600 | 0.014700 | 21.5 | 2.64e-01 | 0.50100 |
| ## TG(56:5)           | 0.017400  | -0.015500 | 0.050200 | 20.3 | 3.00e-01 | 0.55900 |
| ## SM(d40:1)          | 0.009320  | -0.008600 | 0.027200 | 23.9 | 3.08e-01 | 0.56200 |
| ## TG(53:2)           | -0.017800 | -0.053700 | 0.018000 | 20.7 | 3.29e-01 | 0.59000 |
| ## PC(38:3)           | 0.011000  | -0.012700 | 0.034800 | 24.0 | 3.63e-01 | 0.63300 |
| ## PC(33:1)           | 0.013300  | -0.015500 | 0.042100 | 20.9 | 3.64e-01 | 0.63300 |
| ## LPC(18:0)          | 0.008960  | -0.011200 | 0.029100 | 23.9 | 3.83e-01 | 0.64500 |
| ## PC(34:2)           | -0.018500 | -0.060700 | 0.023700 | 26.0 | 3.89e-01 | 0.64500 |
| ## SM(d38:2)          | -0.008840 | -0.029000 | 0.011300 | 21.3 | 3.90e-01 | 0.64500 |
| ## PC(34:3)           | 0.018300  | -0.025000 | 0.061500 | 22.5 | 4.06e-01 | 0.66300 |
| ## PC(0-36:4)         | -0.009480 | -0.035700 | 0.016700 | 22.9 | 4.77e-01 | 0.76300 |
| ## TG(52:2)           | -0.004980 | -0.019000 | 0.009050 | 22.6 | 4.86e-01 | 0.76300 |
| ## SM(d41:1)          | 0.007760  | -0.015100 | 0.030700 | 22.7 | 5.06e-01 | 0.76300 |
| ## TG(54:5)           | -0.012000 | -0.048000 | 0.024000 | 20.6 | 5.14e-01 | 0.76300 |
| ## LPC(18:1)          | 0.008550  | -0.017300 | 0.034400 | 23.7 | 5.16e-01 | 0.76300 |
| ## SM(d36:1)          | -0.005100 | -0.020700 | 0.010500 | 23.4 | 5.20e-01 | 0.76300 |
| ## TG(53:4)           | -0.013200 | -0.055900 | 0.029500 | 19.7 | 5.44e-01 | 0.76300 |
| ## TG(51:1)           | 0.010900  | -0.024800 | 0.046500 | 20.3 | 5.50e-01 | 0.76300 |
| ## SM(d39:1)          | -0.008770 | -0.037700 | 0.020200 | 21.1 | 5.52e-01 | 0.76300 |
| ## TG(49:2)           | 0.008660  | -0.020000 | 0.037300 | 20.4 | 5.54e-01 | 0.76300 |
| ## LPC(18:2)          | 0.010100  | -0.024600 | 0.044800 | 24.0 | 5.68e-01 | 0.76300 |
| ## TG(16:0/22:5/18:1) | 0.009550  | -0.023600 | 0.042700 | 22.7 | 5.71e-01 | 0.76300 |
| ## TG(56:3)           | -0.010500 | -0.047000 | 0.026000 | 20.0 | 5.72e-01 | 0.76300 |
| ## TG(56:4)           | -0.012500 | -0.056200 | 0.031200 | 20.0 | 5.74e-01 | 0.76300 |
| ## TG(18:1/18:1/18:1) | -0.008830 | -0.039800 | 0.022200 | 24.8 | 5.76e-01 | 0.76300 |
| ## SM(42:2)           | -0.004040 | -0.019200 | 0.011100 | 25.2 | 6.01e-01 | 0.78600 |
| ## TG(45:0)           | 0.002500  | -0.008120 | 0.013100 | 23.1 | 6.45e-01 | 0.83300 |
| ## PC(36:3)           | 0.005020  | -0.019100 | 0.029200 | 25.6 | 6.83e-01 | 0.87200 |
| ## TG(53:3)           | -0.006790 | -0.041900 | 0.028300 | 20.7 | 7.04e-01 | 0.88900 |
| ## TG(54:2)           | -0.005460 | -0.035700 | 0.024700 | 23.4 | 7.23e-01 | 0.89900 |
| ## TG(56:6)           | 0.005100  | -0.023900 | 0.034100 | 19.9 | 7.30e-01 | 0.89900 |
| ## PC(0-38:6)         | -0.003680 | -0.026300 | 0.018900 | 20.4 | 7.49e-01 | 0.89900 |
| ## TG(18:2/18:1/16:0) | 0.004320  | -0.023200 | 0.031800 | 25.3 | 7.58e-01 | 0.89900 |
| ## SM(d38:1)          | 0.002780  | -0.015100 | 0.020600 | 23.1 | 7.60e-01 | 0.89900 |
| ## TG(16:0/18:2/18:2) | -0.004980 | -0.040000 | 0.030000 | 24.5 | 7.80e-01 | 0.89900 |
| ## TG(18:1/18:1/16:0) | -0.004410 | -0.035400 | 0.026600 | 25.6 | 7.80e-01 | 0.89900 |
| ## PC(0-36:5)         | 0.003480  | -0.021000 | 0.028000 | 22.3 | 7.81e-01 | 0.89900 |
| ## PC(38:5)           | 0.001830  | -0.012800 | 0.016500 | 24.6 | 8.06e-01 | 0.90900 |

|                       |           |           |          |      |          |         |
|-----------------------|-----------|-----------|----------|------|----------|---------|
| ## TG(49:1)           | 0.004060  | -0.028500 | 0.036600 | 20.9 | 8.07e-01 | 0.90900 |
| ## TG(18:1/18:2/18:2) | -0.003850 | -0.044700 | 0.037000 | 23.6 | 8.53e-01 | 0.95200 |
| ## TG(51:3)           | 0.002930  | -0.031600 | 0.037400 | 20.7 | 8.68e-01 | 0.95300 |
| ## TG(51:2)           | 0.002370  | -0.027000 | 0.031800 | 21.6 | 8.74e-01 | 0.95300 |
| ## PC(35:1)           | -0.001730 | -0.026500 | 0.023000 | 21.8 | 8.91e-01 | 0.95300 |
| ## PC(36:4)           | 0.000956  | -0.013300 | 0.015300 | 25.9 | 8.96e-01 | 0.95300 |
| ## TG(16:0/18:2/18:3) | 0.003450  | -0.054300 | 0.061200 | 22.0 | 9.07e-01 | 0.95300 |
| ## PC(34:1)           | -0.001310 | -0.023600 | 0.021000 | 26.0 | 9.08e-01 | 0.95300 |
| ## LPC(20:4)          | -0.001550 | -0.036000 | 0.032900 | 21.4 | 9.30e-01 | 0.96600 |
| ## PC(37:2)           | -0.001130 | -0.035400 | 0.033200 | 19.3 | 9.48e-01 | 0.97100 |
| ## TG(47:1)           | 0.001390  | -0.044700 | 0.047500 | 19.6 | 9.53e-01 | 0.97100 |
| ## PC(0-34:3)         | 0.000326  | -0.025000 | 0.025700 | 21.9 | 9.80e-01 | 0.98400 |
| ## TG(52:5)           | 0.000486  | -0.048400 | 0.049400 | 19.8 | 9.84e-01 | 0.98400 |

### 1.1.2.2.2 Heatmaps

```
## [1] "map_lipid_names has been created by Tommi Suvitaival"  
## [1] "tommi.raimo.leo.suvitaival@regionh.dk"  
## [1] "2019-05-06"
```

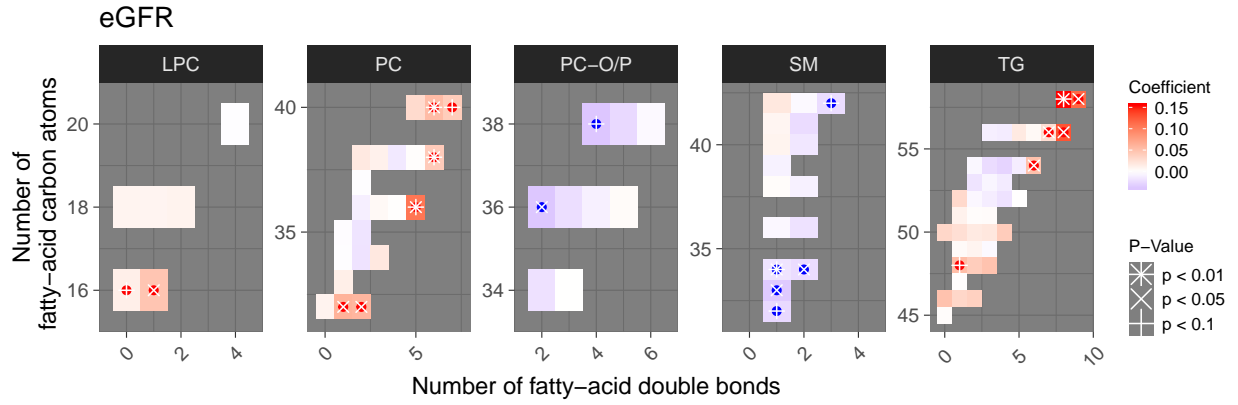

### 1.1.3 logUAER – Continuous Albuminuria

#### 1.1.3.1 Crude Model

### 1.1.3.1.1 Table

```
##
##
## Table: Results of the crude model for continuous albuminuria variable (logUAER).
## Shown in the table are name of the lipid (Name),
## model coefficient (Coefficient),
## its lower and upper confidence intervals (CI.L, CL.R),
## average value of the variable (AveExpr),
## p-value of the coefficient (P.Value) and
## the p-value after correction for multiple testing (adj.P.Val).
## The rows of the table are shown in an increasing order by the respective p-value.
##
```

| ## Name               | Coefficient | CI.L      | CI.R      | AveExpr | P.Value  | adj.P.Val |
|-----------------------|-------------|-----------|-----------|---------|----------|-----------|
| ## PC(0-34:3)         | -0.047000   | -6.39e-02 | -0.030000 | 21.9    | 1.00e-07 | 7.90e-06  |
| ## PC(0-36:3)         | -0.041900   | -5.99e-02 | -0.023900 | 20.4    | 5.80e-06 | 3.09e-04  |
| ## PC(0-38:6)         | -0.026600   | -4.06e-02 | -0.012600 | 20.4    | 2.03e-04 | 5.62e-03  |
| ## PC(0-36:2)         | -0.030800   | -4.70e-02 | -0.014600 | 20.5    | 2.12e-04 | 5.62e-03  |
| ## TG(53:2)           | 0.058900    | 2.70e-02  | 0.090800  | 20.7    | 3.13e-04 | 5.65e-03  |
| ## TG(45:0)           | -0.019700   | -3.05e-02 | -0.008970 | 23.1    | 3.39e-04 | 5.65e-03  |
| ## TG(52:2)           | 0.024400    | 1.10e-02  | 0.037800  | 22.6    | 3.73e-04 | 5.65e-03  |
| ## TG(51:2)           | 0.048400    | 1.99e-02  | 0.077000  | 21.6    | 9.03e-04 | 1.10e-02  |
| ## TG(56:3)           | 0.051000    | 2.09e-02  | 0.081100  | 20.0    | 9.38e-04 | 1.10e-02  |
| ## SM(d18:1/24:0)     | -0.023500   | -3.77e-02 | -0.009240 | 23.5    | 1.27e-03 | 1.29e-02  |
| ## TG(54:2)           | 0.048000    | 1.88e-02  | 0.077300  | 23.4    | 1.34e-03 | 1.29e-02  |
| ## PC(0-34:2)         | -0.033900   | -5.48e-02 | -0.013100 | 21.5    | 1.48e-03 | 1.31e-02  |
| ## PC(16:0e/18:1(9Z)  | -0.022200   | -3.64e-02 | -0.007930 | 21.8    | 2.32e-03 | 1.89e-02  |
| ## TG(53:3)           | 0.045500    | 1.55e-02  | 0.075500  | 20.7    | 3.05e-03 | 2.31e-02  |
| ## SM(d41:1)          | -0.023200   | -3.92e-02 | -0.007250 | 22.7    | 4.43e-03 | 3.13e-02  |
| ## SM(d40:1)          | -0.018800   | -3.24e-02 | -0.005290 | 23.9    | 6.48e-03 | 4.27e-02  |
| ## TG(56:4)           | 0.047700    | 1.32e-02  | 0.082200  | 20.0    | 6.85e-03 | 4.27e-02  |
| ## TG(54:3)           | 0.024300    | 6.45e-03  | 0.042200  | 21.7    | 7.73e-03 | 4.55e-02  |
| ## TG(50:2)           | 0.026900    | 6.59e-03  | 0.047200  | 21.1    | 9.51e-03 | 4.99e-02  |
| ## TG(14:0/18:1/18:1) | 0.032500    | 7.84e-03  | 0.057200  | 24.4    | 9.89e-03 | 4.99e-02  |
| ## TG(50:1)           | 0.041900    | 1.01e-02  | 0.073800  | 24.3    | 1.00e-02 | 4.99e-02  |
| ## TG(56:6)           | 0.026300    | 6.07e-03  | 0.046600  | 19.9    | 1.09e-02 | 4.99e-02  |
| ## PC(32:0)           | -0.012200   | -2.17e-02 | -0.002800 | 22.5    | 1.11e-02 | 4.99e-02  |
| ## TG(51:1)           | 0.039400    | 8.95e-03  | 0.069800  | 20.3    | 1.13e-02 | 4.99e-02  |
| ## TG(52:3)           | 0.018200    | 3.86e-03  | 0.032500  | 22.3    | 1.29e-02 | 5.30e-02  |
| ## TG(16:0/22:5/18:1) | 0.031700    | 6.71e-03  | 0.056700  | 22.7    | 1.30e-02 | 5.30e-02  |
| ## TG(16:0/18:0/18:1) | 0.050300    | 1.01e-02  | 0.090400  | 23.1    | 1.41e-02 | 5.55e-02  |
| ## TG(52:4)           | 0.026500    | 5.17e-03  | 0.047900  | 21.6    | 1.50e-02 | 5.64e-02  |
| ## TG(54:6)           | 0.041800    | 8.00e-03  | 0.075600  | 19.5    | 1.54e-02 | 5.64e-02  |
| ## TG(51:3)           | 0.036000    | 6.45e-03  | 0.065500  | 20.7    | 1.70e-02 | 6.01e-02  |
| ## TG(18:1/18:1/16:0) | 0.022000    | 3.71e-03  | 0.040300  | 25.6    | 1.85e-02 | 6.32e-02  |
| ## TG(56:5)           | 0.030700    | 4.84e-03  | 0.056600  | 20.3    | 2.01e-02 | 6.65e-02  |
| ## PC(0-36:5)         | -0.016300   | -3.06e-02 | -0.001960 | 22.3    | 2.59e-02 | 8.32e-02  |
| ## TG(50:3)           | 0.029700    | 3.09e-03  | 0.056400  | 23.5    | 2.88e-02 | 8.98e-02  |
| ## TG(18:2/18:2/18:2) | 0.035900    | 3.21e-03  | 0.068700  | 22.1    | 3.15e-02 | 9.52e-02  |
| ## PC(32:2)           | -0.026500   | -5.08e-02 | -0.002240 | 20.7    | 3.24e-02 | 9.53e-02  |
| ## PC(40:7)           | -0.020300   | -3.98e-02 | -0.000904 | 21.4    | 4.03e-02 | 1.15e-01  |
| ## LPC(18:2)          | -0.021600   | -4.23e-02 | -0.000798 | 24.0    | 4.18e-02 | 1.17e-01  |
| ## PC(34:2)           | 0.024400    | -9.28e-05 | 0.048900  | 26.0    | 5.09e-02 | 1.37e-01  |

|                       |           |           |          |      |          |          |
|-----------------------|-----------|-----------|----------|------|----------|----------|
| ## TG(18:2/22:5/16:0) | 0.040700  | -3.06e-04 | 0.081800 | 22.1 | 5.17e-02 | 1.37e-01 |
| ## TG(16:0/18:2/18:2) | 0.028300  | -5.36e-04 | 0.057200 | 24.5 | 5.44e-02 | 1.41e-01 |
| ## TG(18:1/18:1/18:1) | 0.022400  | -7.57e-04 | 0.045600 | 24.8 | 5.79e-02 | 1.44e-01 |
| ## TG(49:1)           | 0.023500  | -8.22e-04 | 0.047900 | 20.9 | 5.82e-02 | 1.44e-01 |
| ## TG(53:4)           | 0.030900  | -2.06e-03 | 0.063900 | 19.7 | 6.61e-02 | 1.57e-01 |
| ## TG(14:0/16:0/18:1) | 0.030200  | -2.09e-03 | 0.062500 | 22.8 | 6.67e-02 | 1.57e-01 |
| ## TG(18:0/18:1/20:4) | 0.030400  | -2.37e-03 | 0.063200 | 21.3 | 6.90e-02 | 1.59e-01 |
| ## TG(56:7)           | 0.021200  | -1.97e-03 | 0.044500 | 19.6 | 7.28e-02 | 1.64e-01 |
| ## TG(49:3)           | -0.003280 | -6.89e-03 | 0.000341 | 20.7 | 7.58e-02 | 1.67e-01 |
| ## PC(37:2)           | -0.019400 | -4.13e-02 | 0.002520 | 19.3 | 8.27e-02 | 1.78e-01 |
| ## TG(16:0/18:2/18:3) | 0.037500  | -5.06e-03 | 0.080100 | 22.0 | 8.41e-02 | 1.78e-01 |
| ## TG(52:5)           | 0.029600  | -4.75e-03 | 0.064000 | 19.8 | 9.11e-02 | 1.89e-01 |
| ## SM(d39:1)          | -0.015900 | -3.45e-02 | 0.002650 | 21.1 | 9.28e-02 | 1.89e-01 |
| ## TG(14:0/18:2/18:2) | 0.032500  | -5.69e-03 | 0.070700 | 21.2 | 9.52e-02 | 1.89e-01 |
| ## TG(18:1/12:0/18:1) | 0.027300  | -4.87e-03 | 0.059500 | 22.5 | 9.61e-02 | 1.89e-01 |
| ## PC(38:4)           | 0.008360  | -1.71e-03 | 0.018400 | 25.2 | 1.04e-01 | 2.00e-01 |
| ## PC(38:6)           | -0.010900 | -2.42e-02 | 0.002350 | 25.3 | 1.07e-01 | 2.02e-01 |
| ## TG(18:2/18:1/18:1) | 0.019200  | -5.06e-03 | 0.043500 | 24.4 | 1.20e-01 | 2.24e-01 |
| ## TG(49:2)           | 0.017000  | -5.01e-03 | 0.038900 | 20.4 | 1.30e-01 | 2.38e-01 |
| ## TG(54:4)           | 0.014900  | -5.80e-03 | 0.035600 | 21.4 | 1.58e-01 | 2.83e-01 |
| ## SM(d41:2)          | -0.010400 | -2.53e-02 | 0.004500 | 22.5 | 1.71e-01 | 3.00e-01 |
| ## SM(d34:1)          | 0.004200  | -1.87e-03 | 0.010300 | 24.9 | 1.75e-01 | 3.00e-01 |
| ## PC(35:2)           | -0.012000 | -2.94e-02 | 0.005430 | 21.8 | 1.77e-01 | 3.00e-01 |
| ## SM(d38:2)          | -0.009200 | -2.27e-02 | 0.004300 | 21.3 | 1.81e-01 | 3.00e-01 |
| ## PC(36:5)           | -0.020800 | -5.12e-02 | 0.009700 | 24.3 | 1.81e-01 | 3.00e-01 |
| ## PC(36:2)           | -0.006110 | -1.53e-02 | 0.003070 | 26.1 | 1.92e-01 | 3.13e-01 |
| ## TG(46:2)           | 0.022200  | -1.21e-02 | 0.056600 | 20.1 | 2.04e-01 | 3.28e-01 |
| ## SM(d38:1)          | -0.007900 | -2.05e-02 | 0.004710 | 23.1 | 2.19e-01 | 3.45e-01 |
| ## LPC(20:4)          | 0.012600  | -7.63e-03 | 0.032900 | 21.4 | 2.21e-01 | 3.45e-01 |
| ## SM(d40:2)          | -0.007170 | -1.90e-02 | 0.004690 | 23.7 | 2.36e-01 | 3.62e-01 |
| ## TG(50:0)           | 0.021500  | -1.50e-02 | 0.058000 | 20.8 | 2.47e-01 | 3.72e-01 |
| ## TG(18:1/18:1/22:6) | 0.028200  | -2.00e-02 | 0.076300 | 20.7 | 2.51e-01 | 3.72e-01 |
| ## TG(54:5)           | 0.014700  | -1.05e-02 | 0.040000 | 20.6 | 2.52e-01 | 3.72e-01 |
| ## PC(38:3)           | 0.009080  | -6.82e-03 | 0.025000 | 24.0 | 2.63e-01 | 3.81e-01 |
| ## PC(40:6)           | -0.011200 | -3.11e-02 | 0.008770 | 23.9 | 2.72e-01 | 3.89e-01 |
| ## TG(48:3)           | 0.023700  | -1.94e-02 | 0.066900 | 20.5 | 2.81e-01 | 3.95e-01 |
| ## TG(46:1)           | 0.017500  | -1.45e-02 | 0.049500 | 21.3 | 2.83e-01 | 3.95e-01 |
| ## SM(d32:1)          | 0.007230  | -6.39e-03 | 0.020800 | 22.3 | 2.97e-01 | 4.07e-01 |
| ## TG(18:1/18:2/18:2) | 0.015800  | -1.41e-02 | 0.045600 | 23.6 | 3.00e-01 | 4.07e-01 |
| ## TG(18:2/18:1/16:0) | 0.007520  | -8.91e-03 | 0.023900 | 25.3 | 3.69e-01 | 4.95e-01 |
| ## PC(34:1)           | 0.005490  | -7.07e-03 | 0.018000 | 26.0 | 3.91e-01 | 5.18e-01 |
| ## PC(0-38:5)         | -0.005040 | -1.80e-02 | 0.007870 | 22.8 | 4.44e-01 | 5.80e-01 |
| ## SM(d18:2/24:1)     | -0.004320 | -1.66e-02 | 0.007990 | 24.0 | 4.91e-01 | 6.34e-01 |
| ## PC(36:4)           | 0.002820  | -5.35e-03 | 0.011000 | 25.9 | 4.98e-01 | 6.35e-01 |
| ## PC(38:5)           | -0.003130 | -1.24e-02 | 0.006160 | 24.6 | 5.08e-01 | 6.35e-01 |
| ## SM(d36:2)          | 0.003980  | -7.85e-03 | 0.015800 | 21.4 | 5.09e-01 | 6.35e-01 |
| ## SM(42:2)           | -0.003370 | -1.39e-02 | 0.007190 | 25.2 | 5.31e-01 | 6.54e-01 |
| ## TG(46:0)           | 0.008220  | -2.20e-02 | 0.038500 | 20.4 | 5.93e-01 | 7.23e-01 |
| ## TG(58:9)           | 0.010900  | -3.71e-02 | 0.058800 | 19.9 | 6.56e-01 | 7.90e-01 |
| ## TG(16:0/18:2/22:6) | 0.011000  | -4.21e-02 | 0.064200 | 21.0 | 6.84e-01 | 8.15e-01 |
| ## PC(0-38:4)         | -0.003460 | -2.07e-02 | 0.013700 | 21.7 | 6.93e-01 | 8.17e-01 |
| ## TG(47:1)           | -0.004750 | -3.11e-02 | 0.021600 | 19.6 | 7.23e-01 | 8.33e-01 |
| ## SM(d16:1/18:1)     | -0.002230 | -1.46e-02 | 0.010200 | 22.8 | 7.23e-01 | 8.33e-01 |
| ## PC(38:2)           | -0.002440 | -1.69e-02 | 0.012000 | 21.2 | 7.41e-01 | 8.44e-01 |

|               |           |           |          |      |          |          |
|---------------|-----------|-----------|----------|------|----------|----------|
| ## SM(d33:1)  | -0.002270 | -1.64e-02 | 0.011800 | 21.3 | 7.52e-01 | 8.48e-01 |
| ## PC(34:3)   | 0.004120  | -2.32e-02 | 0.031400 | 22.5 | 7.67e-01 | 8.56e-01 |
| ## PC(35:1)   | 0.002320  | -1.39e-02 | 0.018600 | 21.8 | 7.79e-01 | 8.60e-01 |
| ## LPC(18:0)  | -0.001360 | -1.37e-02 | 0.011000 | 23.9 | 8.28e-01 | 9.02e-01 |
| ## LPC(18:1)  | 0.001640  | -1.38e-02 | 0.017100 | 23.7 | 8.34e-01 | 9.02e-01 |
| ## PC(36:3)   | -0.001290 | -1.60e-02 | 0.013500 | 25.6 | 8.64e-01 | 9.23e-01 |
| ## PC(32:1)   | 0.002220  | -2.48e-02 | 0.029200 | 23.3 | 8.72e-01 | 9.23e-01 |
| ## LPC(16:0)  | -0.000536 | -7.44e-03 | 0.006370 | 25.3 | 8.79e-01 | 9.23e-01 |
| ## PC(40:5)   | -0.001080 | -1.85e-02 | 0.016400 | 22.0 | 9.03e-01 | 9.36e-01 |
| ## LPC(16:1)  | 0.001060  | -1.88e-02 | 0.021000 | 20.0 | 9.17e-01 | 9.36e-01 |
| ## SM(d36:1)  | -0.000566 | -1.15e-02 | 0.010300 | 23.4 | 9.19e-01 | 9.36e-01 |
| ## PC(33:1)   | 0.000188  | -1.88e-02 | 0.019200 | 20.9 | 9.85e-01 | 9.85e-01 |
| ## PC(0-36:4) | 0.000145  | -1.52e-02 | 0.015400 | 22.9 | 9.85e-01 | 9.85e-01 |



### 1.1.3.1.2 Heatmaps

```
##   Label Relation p.adj
## 1    # p.adj < 0.01
## 2    x p.adj < 0.05
## 3    * p.adj < 0.10
```

# logUAER

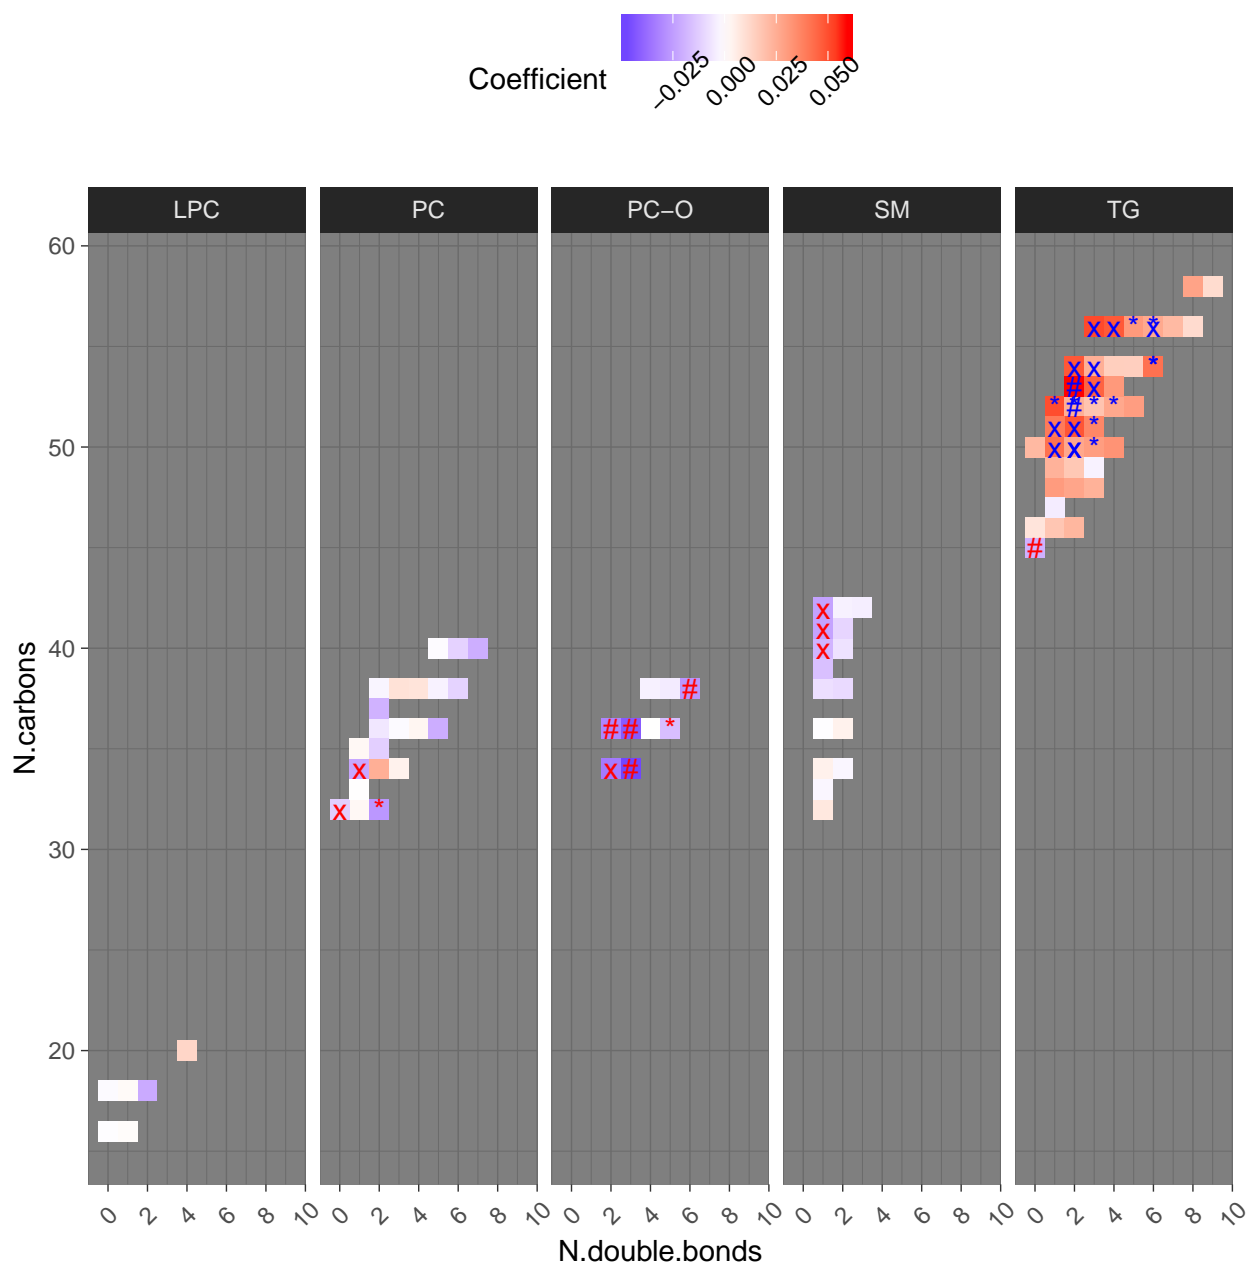

Figure 8: Heatmap of the lipid-specific model coefficients from the crude model for continuous albuminuria (logUAER). The name of the group is shown in the title of the figure in the top-left corner. Lipids are organized into panels (columns) by their class (from LPC to TG). One colored rectangle corresponds to one lipid species, where the coordinates in the x-axis and y-axis, respectively, show the number of double bonds (N.double.bonds) and the number of carbon atoms (N.carbons) in the fatty acid chains of the lipid. The number of double bonds corresponds to the number of unsaturated bonds in the fatty acid chains, and the number of carbon atoms corresponds to the length of the fatty acid chains and, thus, the size of the lipid. The magnitude of the lipid-specific model coefficient is shown as the color of the rectangle (blue: negative; red: positive). Coefficient with statistical significance are annotated with symbols #, x and \*, respectively, corresponding to  $p < 0.01$ ,  $p < 0.05$  and  $p < 0.1$ .

### 1.1.3.2 Adjusted Model

### 1.1.3.2.1 Table

```
##
##
## Table: Results of the adjusted model for the continuous albuminuria variable (logUAER).
## Shown in the table are name of the lipid (Name),
## model coefficient (Coefficient),
## its lower and upper confidence intervals (CI.L, CL.R),
## average value of the variable (AveExpr),
## p-value of the coefficient (P.Value) and
## the p-value after correction for multiple testing (adj.P.Val).
## The rows of the table are shown in an increasing order by the respective p-value.
##
```

| ## Name               | Coefficient | CI.L     | CI.R      | AveExpr | P.Value  | adj.P.Val |
|-----------------------|-------------|----------|-----------|---------|----------|-----------|
| ## SM(d18:1/24:0)     | -2.84e-02   | -0.04170 | -0.015200 | 23.5    | 2.95e-05 | 0.00264   |
| ## SM(d40:1)          | -2.53e-02   | -0.03750 | -0.013200 | 23.9    | 4.97e-05 | 0.00264   |
| ## SM(d41:1)          | -2.63e-02   | -0.04180 | -0.010800 | 22.7    | 9.32e-04 | 0.03290   |
| ## TG(18:0/18:1/20:4) | -5.12e-02   | -0.08500 | -0.017300 | 21.3    | 3.09e-03 | 0.08180   |
| ## SM(d38:1)          | -1.77e-02   | -0.02980 | -0.005630 | 23.1    | 4.14e-03 | 0.08770   |
| ## PC(0-34:3)         | -2.45e-02   | -0.04170 | -0.007370 | 21.9    | 5.16e-03 | 0.09110   |
| ## SM(d38:2)          | -1.80e-02   | -0.03160 | -0.004340 | 21.3    | 9.85e-03 | 0.13100   |
| ## SM(d40:2)          | -1.43e-02   | -0.02520 | -0.003460 | 23.7    | 9.89e-03 | 0.13100   |
| ## SM(d39:1)          | -2.26e-02   | -0.04220 | -0.002950 | 21.1    | 2.43e-02 | 0.27100   |
| ## PC(0-38:6)         | -1.74e-02   | -0.03270 | -0.002100 | 20.4    | 2.59e-02 | 0.27100   |
| ## PC(0-36:5)         | -1.85e-02   | -0.03520 | -0.001920 | 22.3    | 2.89e-02 | 0.27100   |
| ## PC(0-36:3)         | -1.99e-02   | -0.03800 | -0.001670 | 20.4    | 3.25e-02 | 0.27100   |
| ## PC(0-36:2)         | -1.88e-02   | -0.03610 | -0.001500 | 20.5    | 3.32e-02 | 0.27100   |
| ## LPC(20:4)          | -2.44e-02   | -0.04770 | -0.001010 | 21.4    | 4.09e-02 | 0.31000   |
| ## SM(d16:1/18:1)     | -1.02e-02   | -0.02060 | 0.000109  | 22.8    | 5.25e-02 | 0.37100   |
| ## PC(36:2)           | -9.97e-03   | -0.02090 | 0.001000  | 26.1    | 7.49e-02 | 0.46300   |
| ## LPC(18:2)          | -2.08e-02   | -0.04440 | 0.002760  | 24.0    | 8.35e-02 | 0.46300   |
| ## TG(56:5)           | -1.97e-02   | -0.04200 | 0.002640  | 20.3    | 8.38e-02 | 0.46300   |
| ## SM(d36:2)          | -1.06e-02   | -0.02260 | 0.001440  | 21.4    | 8.43e-02 | 0.46300   |
| ## SM(d36:1)          | -9.20e-03   | -0.01980 | 0.001350  | 23.4    | 8.73e-02 | 0.46300   |
| ## TG(18:2/18:1/18:1) | -1.86e-02   | -0.04070 | 0.003430  | 24.4    | 9.78e-02 | 0.49000   |
| ## SM(d41:2)          | -1.22e-02   | -0.02690 | 0.002600  | 22.5    | 1.06e-01 | 0.49000   |
| ## TG(54:4)           | -1.58e-02   | -0.03510 | 0.003390  | 21.4    | 1.06e-01 | 0.49000   |
| ## PC(38:4)           | -8.23e-03   | -0.01930 | 0.002840  | 25.2    | 1.45e-01 | 0.63600   |
| ## TG(56:6)           | -1.43e-02   | -0.03400 | 0.005380  | 19.9    | 1.54e-01 | 0.63600   |
| ## PC(0-34:2)         | -1.66e-02   | -0.03970 | 0.006510  | 21.5    | 1.59e-01 | 0.63600   |
| ## TG(54:3)           | -1.03e-02   | -0.02480 | 0.004150  | 21.7    | 1.62e-01 | 0.63600   |
| ## TG(16:0/22:5/18:1) | -1.56e-02   | -0.03810 | 0.006880  | 22.7    | 1.74e-01 | 0.64400   |
| ## TG(52:3)           | -7.75e-03   | -0.01900 | 0.003490  | 22.3    | 1.76e-01 | 0.64400   |
| ## TG(18:1/18:2/18:2) | -1.84e-02   | -0.04610 | 0.009340  | 23.6    | 1.93e-01 | 0.66500   |
| ## TG(50:0)           | -2.21e-02   | -0.05550 | 0.011400  | 20.8    | 1.95e-01 | 0.66500   |
| ## TG(18:1/18:1/18:1) | -1.37e-02   | -0.03470 | 0.007350  | 24.8    | 2.02e-01 | 0.66500   |
| ## TG(54:5)           | -1.53e-02   | -0.03980 | 0.009090  | 20.6    | 2.18e-01 | 0.66500   |
| ## PC(0-38:4)         | -1.22e-02   | -0.03190 | 0.007480  | 21.7    | 2.24e-01 | 0.66500   |
| ## TG(18:1/18:1/22:6) | 3.32e-02    | -0.02030 | 0.086700  | 20.7    | 2.24e-01 | 0.66500   |
| ## TG(16:0/18:2/18:2) | -1.47e-02   | -0.03840 | 0.009090  | 24.5    | 2.26e-01 | 0.66500   |
| ## PC(32:1)           | 1.76e-02    | -0.01150 | 0.046600  | 23.3    | 2.36e-01 | 0.67500   |
| ## PC(38:2)           | 8.75e-03    | -0.00596 | 0.023500  | 21.2    | 2.43e-01 | 0.67800   |
| ## SM(d18:2/24:1)     | -7.03e-03   | -0.01900 | 0.004950  | 24.0    | 2.50e-01 | 0.67800   |

|                       |           |          |          |      |          |         |
|-----------------------|-----------|----------|----------|------|----------|---------|
| ## TG(18:1/18:1/16:0) | 1.22e-02  | -0.00887 | 0.033300 | 25.6 | 2.56e-01 | 0.67900 |
| ## TG(52:4)           | -9.75e-03 | -0.02760 | 0.008140 | 21.6 | 2.85e-01 | 0.73700 |
| ## TG(48:3)           | -1.97e-02 | -0.05690 | 0.017600 | 20.5 | 3.00e-01 | 0.73900 |
| ## TG(54:2)           | -1.07e-02 | -0.03120 | 0.009810 | 23.4 | 3.06e-01 | 0.73900 |
| ## PC(40:6)           | 1.06e-02  | -0.00976 | 0.031000 | 23.9 | 3.07e-01 | 0.73900 |
| ## TG(18:2/22:5/16:0) | 2.16e-02  | -0.02080 | 0.064000 | 22.1 | 3.18e-01 | 0.74000 |
| ## SM(42:2)           | -5.15e-03 | -0.01540 | 0.005120 | 25.2 | 3.25e-01 | 0.74000 |
| ## PC(40:5)           | 8.90e-03  | -0.00896 | 0.026800 | 22.0 | 3.28e-01 | 0.74000 |
| ## SM(d34:1)          | 3.05e-03  | -0.00338 | 0.009480 | 24.9 | 3.52e-01 | 0.76500 |
| ## TG(50:3)           | -7.59e-03 | -0.02400 | 0.008780 | 23.5 | 3.63e-01 | 0.76500 |
| ## PC(34:3)           | 1.35e-02  | -0.01580 | 0.042900 | 22.5 | 3.65e-01 | 0.76500 |
| ## PC(34:1)           | 6.94e-03  | -0.00819 | 0.022100 | 26.0 | 3.68e-01 | 0.76500 |
| ## PC(33:1)           | 8.63e-03  | -0.01090 | 0.028200 | 20.9 | 3.87e-01 | 0.77000 |
| ## PC(35:2)           | -8.36e-03 | -0.02730 | 0.010600 | 21.8 | 3.87e-01 | 0.77000 |
| ## PC(40:7)           | 8.86e-03  | -0.01160 | 0.029300 | 21.4 | 3.95e-01 | 0.77000 |
| ## TG(56:4)           | -1.27e-02 | -0.04230 | 0.016900 | 20.0 | 3.99e-01 | 0.77000 |
| ## PC(36:3)           | -6.78e-03 | -0.02320 | 0.009610 | 25.6 | 4.17e-01 | 0.77800 |
| ## LPC(16:1)          | 9.42e-03  | -0.01340 | 0.032200 | 20.0 | 4.18e-01 | 0.77800 |
| ## TG(52:5)           | -1.31e-02 | -0.04630 | 0.020100 | 19.8 | 4.38e-01 | 0.79600 |
| ## PC(38:3)           | -6.30e-03 | -0.02240 | 0.009830 | 24.0 | 4.43e-01 | 0.79600 |
| ## PC(36:4)           | -3.72e-03 | -0.01340 | 0.005990 | 25.9 | 4.52e-01 | 0.79900 |
| ## TG(49:3)           | 1.08e-03  | -0.00194 | 0.004100 | 20.7 | 4.84e-01 | 0.84100 |
| ## PC(34:2)           | 9.87e-03  | -0.01880 | 0.038500 | 26.0 | 4.98e-01 | 0.84100 |
| ## PC(38:6)           | 4.76e-03  | -0.00910 | 0.018600 | 25.3 | 5.00e-01 | 0.84100 |
| ## TG(53:4)           | -8.61e-03 | -0.03750 | 0.020300 | 19.7 | 5.59e-01 | 0.92000 |
| ## TG(52:2)           | -2.80e-03 | -0.01230 | 0.006730 | 22.6 | 5.64e-01 | 0.92000 |
| ## PC(0-36:4)         | -4.97e-03 | -0.02270 | 0.012800 | 22.9 | 5.82e-01 | 0.93500 |
| ## TG(56:3)           | -6.53e-03 | -0.03130 | 0.018200 | 20.0 | 6.04e-01 | 0.94700 |
| ## TG(45:0)           | 1.85e-03  | -0.00534 | 0.009050 | 23.1 | 6.14e-01 | 0.94700 |
| ## PC(32:0)           | 2.54e-03  | -0.00740 | 0.012500 | 22.5 | 6.16e-01 | 0.94700 |
| ## TG(16:0/18:2/18:3) | -9.63e-03 | -0.04880 | 0.029600 | 22.0 | 6.30e-01 | 0.95200 |
| ## TG(51:2)           | 4.73e-03  | -0.01520 | 0.024700 | 21.6 | 6.42e-01 | 0.95200 |
| ## PC(0-38:5)         | -3.25e-03 | -0.01810 | 0.011600 | 22.8 | 6.68e-01 | 0.95200 |
| ## TG(18:2/18:1/16:0) | 3.95e-03  | -0.01470 | 0.022600 | 25.3 | 6.78e-01 | 0.95200 |
| ## SM(d33:1)          | -2.99e-03 | -0.01730 | 0.011300 | 21.3 | 6.81e-01 | 0.95200 |
| ## TG(14:0/16:0/18:1) | 4.95e-03  | -0.02160 | 0.031500 | 22.8 | 7.15e-01 | 0.95200 |
| ## PC(16:0e/18:1(9Z)) | -2.72e-03 | -0.01740 | 0.011900 | 21.8 | 7.15e-01 | 0.95200 |
| ## TG(58:9)           | 1.01e-02  | -0.04420 | 0.064400 | 19.9 | 7.16e-01 | 0.95200 |
| ## TG(16:0/18:0/18:1) | -6.11e-03 | -0.03940 | 0.027200 | 23.1 | 7.19e-01 | 0.95200 |
| ## PC(32:2)           | -4.70e-03 | -0.03050 | 0.021100 | 20.7 | 7.20e-01 | 0.95200 |
| ## TG(14:0/18:2/18:2) | -5.05e-03 | -0.03370 | 0.023600 | 21.2 | 7.29e-01 | 0.95200 |
| ## TG(50:1)           | 4.37e-03  | -0.02180 | 0.030600 | 24.3 | 7.43e-01 | 0.95200 |
| ## TG(46:0)           | -4.62e-03 | -0.03360 | 0.024400 | 20.4 | 7.55e-01 | 0.95200 |
| ## TG(18:2/18:2/18:2) | -4.63e-03 | -0.03550 | 0.026200 | 22.1 | 7.68e-01 | 0.95200 |
| ## TG(49:2)           | -2.66e-03 | -0.02210 | 0.016800 | 20.4 | 7.88e-01 | 0.95200 |
| ## TG(14:0/18:1/18:1) | -2.28e-03 | -0.01930 | 0.014700 | 24.4 | 7.92e-01 | 0.95200 |
| ## TG(46:1)           | -3.95e-03 | -0.03390 | 0.026000 | 21.3 | 7.95e-01 | 0.95200 |
| ## TG(53:3)           | -3.11e-03 | -0.02690 | 0.020700 | 20.7 | 7.98e-01 | 0.95200 |
| ## TG(18:1/12:0/18:1) | -3.15e-03 | -0.02880 | 0.022500 | 22.5 | 8.09e-01 | 0.95200 |
| ## TG(51:3)           | -2.84e-03 | -0.02630 | 0.020600 | 20.7 | 8.12e-01 | 0.95200 |
| ## TG(51:1)           | -2.65e-03 | -0.02690 | 0.021600 | 20.3 | 8.30e-01 | 0.95200 |
| ## PC(36:5)           | -3.35e-03 | -0.03550 | 0.028800 | 24.3 | 8.38e-01 | 0.95200 |
| ## LPC(16:0)          | -7.46e-04 | -0.00821 | 0.006720 | 25.3 | 8.44e-01 | 0.95200 |
| ## LPC(18:0)          | 1.24e-03  | -0.01240 | 0.014900 | 23.9 | 8.59e-01 | 0.95200 |

|                       |           |          |          |      |          |         |
|-----------------------|-----------|----------|----------|------|----------|---------|
| ## TG(16:0/18:2/22:6) | -5.16e-03 | -0.06280 | 0.052500 | 21.0 | 8.61e-01 | 0.95200 |
| ## PC(38:5)           | 8.69e-04  | -0.00909 | 0.010800 | 24.6 | 8.64e-01 | 0.95200 |
| ## SM(d32:1)          | 1.11e-03  | -0.01220 | 0.014400 | 22.3 | 8.69e-01 | 0.95200 |
| ## TG(56:7)           | 1.92e-03  | -0.02240 | 0.026200 | 19.6 | 8.77e-01 | 0.95200 |
| ## TG(47:1)           | 2.39e-03  | -0.02890 | 0.033700 | 19.6 | 8.81e-01 | 0.95200 |
| ## LPC(18:1)          | -1.20e-03 | -0.01870 | 0.016300 | 23.7 | 8.93e-01 | 0.95200 |
| ## PC(37:2)           | 1.44e-03  | -0.02180 | 0.024700 | 19.3 | 9.03e-01 | 0.95200 |
| ## TG(49:1)           | -1.31e-03 | -0.02340 | 0.020800 | 20.9 | 9.07e-01 | 0.95200 |
| ## TG(50:2)           | 7.19e-04  | -0.01370 | 0.015200 | 21.1 | 9.22e-01 | 0.95800 |
| ## TG(53:2)           | -9.74e-04 | -0.02520 | 0.023300 | 20.7 | 9.37e-01 | 0.96200 |
| ## PC(35:1)           | 5.15e-04  | -0.01630 | 0.017300 | 21.8 | 9.52e-01 | 0.96200 |
| ## TG(46:2)           | -9.01e-04 | -0.03110 | 0.029300 | 20.1 | 9.53e-01 | 0.96200 |
| ## TG(54:6)           | -6.16e-05 | -0.03360 | 0.033500 | 19.5 | 9.97e-01 | 0.99700 |

### 1.1.3.2.2 Heatmaps

```
## [1] "map_lipid_names has been created by Tommi Suvitaival"  
## [1] "tommi.raimo.leo.suvitaival@regionh.dk"  
## [1] "2019-05-06"
```

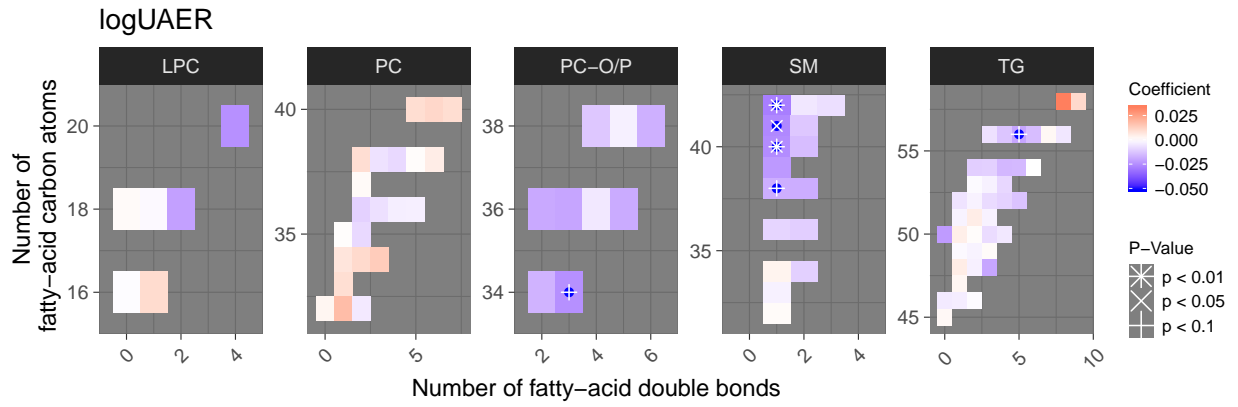

#### 1.1.4 Combined Heatmaps from Adjusted Cross-sectional Analyses



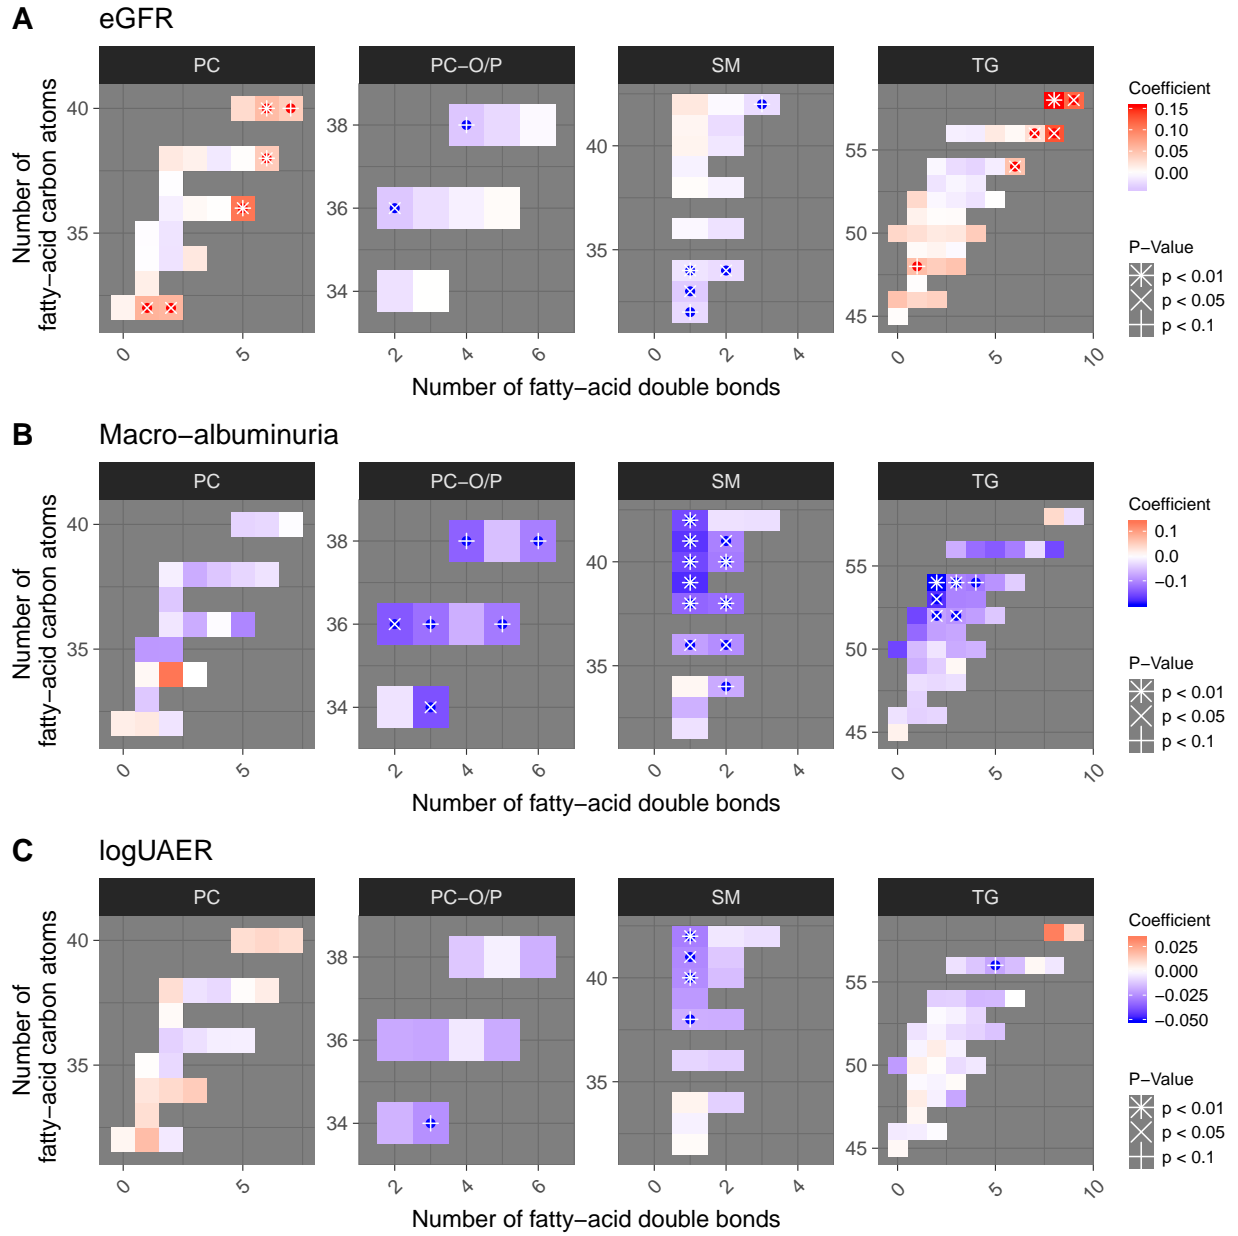

## 1.2 Step 1B: Crude Associations of All Lipids to Clinical Changes Over Time

### 1.2.1 eGFR Slope

### 1.2.1.1 Table

```
##
##
## Table: Results of the crude model for the eGFR slope.
## Shown in the table are name of the lipid (Name),
## model coefficient (Coefficient),
## its lower and upper confidence intervals (CI.L, CL.R),
## average value of the variable (AveExpr),
## p-value of the coefficient (P.Value) and
## the p-value after correction for multiple testing (adj.P.Val).
## The rows of the table are shown in an increasing order by the respective p-value.
```

| ## Name               | Coefficient | CI.L      | CI.R      | AveExpr | P.Value  | adj.P.Val |
|-----------------------|-------------|-----------|-----------|---------|----------|-----------|
| ## PC(36:4)           | -0.012800   | -0.018600 | -0.006930 | 26.0    | 2.14e-05 | 0.00227   |
| ## TG(14:0/16:0/18:1) | -0.035400   | -0.058100 | -0.012700 | 22.8    | 2.26e-03 | 0.06860   |
| ## LPC(16:0)          | -0.007400   | -0.012200 | -0.002640 | 25.3    | 2.35e-03 | 0.06860   |
| ## PC(0-38:6)         | 0.015000    | 0.005030  | 0.024900  | 20.4    | 3.22e-03 | 0.06860   |
| ## TG(51:3)           | -0.030200   | -0.050700 | -0.009640 | 20.7    | 4.04e-03 | 0.06860   |
| ## TG(51:2)           | -0.029400   | -0.049700 | -0.009180 | 21.5    | 4.47e-03 | 0.06860   |
| ## TG(50:2)           | -0.021000   | -0.035600 | -0.006330 | 21.1    | 5.08e-03 | 0.06860   |
| ## TG(14:0/18:1/18:1) | -0.025000   | -0.042500 | -0.007520 | 24.4    | 5.18e-03 | 0.06860   |
| ## TG(50:0)           | -0.035200   | -0.061500 | -0.008980 | 20.8    | 8.62e-03 | 0.08520   |
| ## TG(18:2/18:2/18:2) | -0.031500   | -0.055300 | -0.007820 | 22.1    | 9.27e-03 | 0.08520   |
| ## TG(51:1)           | -0.028700   | -0.050300 | -0.007010 | 20.3    | 9.59e-03 | 0.08520   |
| ## TG(46:0)           | -0.027600   | -0.048600 | -0.006740 | 20.4    | 9.64e-03 | 0.08520   |
| ## TG(50:3)           | -0.023500   | -0.042700 | -0.004340 | 23.4    | 1.64e-02 | 0.13100   |
| ## TG(52:2)           | -0.012000   | -0.021800 | -0.002120 | 22.6    | 1.74e-02 | 0.13100   |
| ## TG(49:1)           | -0.021000   | -0.038500 | -0.003490 | 20.8    | 1.88e-02 | 0.13300   |
| ## TG(18:1/12:0/18:1) | -0.027400   | -0.050700 | -0.004130 | 22.4    | 2.11e-02 | 0.14000   |
| ## PC(32:1)           | -0.022500   | -0.042100 | -0.002910 | 23.3    | 2.45e-02 | 0.15000   |
| ## TG(46:1)           | -0.026100   | -0.049000 | -0.003210 | 21.2    | 2.55e-02 | 0.15000   |
| ## TG(50:1)           | -0.026100   | -0.049400 | -0.002820 | 24.3    | 2.81e-02 | 0.15000   |
| ## TG(16:0/18:0/18:1) | -0.033000   | -0.062800 | -0.003200 | 23.1    | 3.01e-02 | 0.15000   |
| ## PC(38:3)           | -0.012400   | -0.023800 | -0.001050 | 24.0    | 3.23e-02 | 0.15000   |
| ## TG(14:0/18:2/18:2) | -0.029900   | -0.057400 | -0.002490 | 21.1    | 3.26e-02 | 0.15000   |
| ## PC(0-36:2)         | 0.012600    | 0.001040  | 0.024100  | 20.5    | 3.26e-02 | 0.15000   |
| ## TG(49:2)           | -0.016800   | -0.032400 | -0.001220 | 20.4    | 3.47e-02 | 0.15200   |
| ## TG(53:2)           | -0.024500   | -0.047500 | -0.001620 | 20.6    | 3.60e-02 | 0.15200   |
| ## TG(48:3)           | -0.032900   | -0.064000 | -0.001720 | 20.5    | 3.87e-02 | 0.15600   |
| ## TG(56:5)           | -0.019500   | -0.038200 | -0.000833 | 20.3    | 4.07e-02 | 0.15600   |
| ## PC(36:3)           | -0.011100   | -0.021700 | -0.000450 | 25.6    | 4.11e-02 | 0.15600   |
| ## PC(33:1)           | -0.014400   | -0.028400 | -0.000378 | 20.8    | 4.42e-02 | 0.15800   |
| ## TG(16:0/22:5/18:1) | -0.018700   | -0.036900 | -0.000453 | 22.7    | 4.46e-02 | 0.15800   |
| ## TG(46:2)           | -0.024800   | -0.049400 | -0.000318 | 20.1    | 4.71e-02 | 0.16100   |
| ## TG(53:3)           | -0.019900   | -0.041300 | 0.001400  | 20.7    | 6.70e-02 | 0.22200   |
| ## LPC(16:1)          | -0.013100   | -0.027400 | 0.001300  | 20.0    | 7.45e-02 | 0.23900   |
| ## PC(34:3)           | -0.017700   | -0.037700 | 0.002240  | 22.4    | 8.17e-02 | 0.24700   |
| ## PC(0-38:5)         | 0.008360    | -0.001100 | 0.017800  | 22.8    | 8.30e-02 | 0.24700   |
| ## TG(18:2/22:5/16:0) | -0.026400   | -0.056300 | 0.003540  | 22.1    | 8.39e-02 | 0.24700   |
| ## PC(32:2)           | -0.015500   | -0.033200 | 0.002220  | 20.7    | 8.64e-02 | 0.24700   |
| ## TG(52:3)           | -0.008570   | -0.018900 | 0.001720  | 22.3    | 1.03e-01 | 0.28100   |
| ## TG(18:0/18:1/20:4) | -0.020000   | -0.044400 | 0.004420  | 21.3    | 1.08e-01 | 0.28100   |

|                       |           |           |          |      |          |         |
|-----------------------|-----------|-----------|----------|------|----------|---------|
| ## TG(45:0)           | 0.006260  | -0.001450 | 0.014000 | 23.1 | 1.11e-01 | 0.28100 |
| ## PC(0-34:3)         | 0.009890  | -0.002290 | 0.022100 | 21.9 | 1.11e-01 | 0.28100 |
| ## PC(36:2)           | -0.006190 | -0.013900 | 0.001470 | 26.1 | 1.13e-01 | 0.28100 |
| ## TG(49:3)           | 0.002120  | -0.000512 | 0.004760 | 20.7 | 1.14e-01 | 0.28100 |
| ## TG(54:2)           | -0.017100 | -0.038800 | 0.004580 | 23.4 | 1.22e-01 | 0.29300 |
| ## PC(0-34:2)         | 0.011200  | -0.003900 | 0.026300 | 21.5 | 1.46e-01 | 0.34300 |
| ## TG(16:0/18:2/18:2) | -0.014900 | -0.035500 | 0.005600 | 24.5 | 1.54e-01 | 0.35400 |
| ## PC(16:0e/18:1(9Z)) | 0.007230  | -0.002810 | 0.017300 | 21.8 | 1.58e-01 | 0.35600 |
| ## TG(52:5)           | -0.017100 | -0.041200 | 0.006940 | 19.8 | 1.63e-01 | 0.36000 |
| ## TG(56:6)           | -0.010400 | -0.025100 | 0.004430 | 19.9 | 1.69e-01 | 0.36600 |
| ## TG(56:7)           | -0.010700 | -0.027500 | 0.006090 | 19.6 | 2.11e-01 | 0.44700 |
| ## LPC(18:0)          | -0.005540 | -0.014300 | 0.003240 | 24.0 | 2.16e-01 | 0.44800 |
| ## TG(18:1/18:1/16:0) | -0.007830 | -0.021000 | 0.005300 | 25.6 | 2.42e-01 | 0.48800 |
| ## TG(54:6)           | -0.015200 | -0.040900 | 0.010400 | 19.5 | 2.44e-01 | 0.48800 |
| ## PC(40:7)           | 0.007890  | -0.005830 | 0.021600 | 21.4 | 2.59e-01 | 0.50300 |
| ## PC(34:1)           | 0.005220  | -0.003920 | 0.014400 | 25.9 | 2.63e-01 | 0.50300 |
| ## SM(d41:2)          | 0.006020  | -0.004590 | 0.016600 | 22.5 | 2.66e-01 | 0.50300 |
| ## PC(40:5)           | -0.006980 | -0.019600 | 0.005660 | 22.0 | 2.79e-01 | 0.51800 |
| ## SM(d39:1)          | 0.007040  | -0.005970 | 0.020000 | 21.1 | 2.88e-01 | 0.52200 |
| ## PC(35:1)           | -0.006450 | -0.018400 | 0.005530 | 21.8 | 2.91e-01 | 0.52200 |
| ## TG(16:0/18:2/18:3) | -0.016500 | -0.047600 | 0.014600 | 22.0 | 2.98e-01 | 0.52600 |
| ## LPC(18:1)          | -0.005800 | -0.017100 | 0.005520 | 23.7 | 3.15e-01 | 0.54700 |
| ## TG(18:1/18:1/22:6) | -0.017200 | -0.051300 | 0.017000 | 20.7 | 3.23e-01 | 0.55200 |
| ## SM(d41:1)          | 0.005540  | -0.005750 | 0.016800 | 22.7 | 3.35e-01 | 0.56400 |
| ## PC(0-36:3)         | 0.006160  | -0.006810 | 0.019100 | 20.4 | 3.51e-01 | 0.57500 |
| ## TG(53:4)           | -0.010900 | -0.034100 | 0.012300 | 19.7 | 3.58e-01 | 0.57500 |
| ## PC(35:2)           | 0.005610  | -0.006570 | 0.017800 | 21.8 | 3.66e-01 | 0.57500 |
| ## PC(0-36:5)         | 0.004720  | -0.005550 | 0.015000 | 22.3 | 3.67e-01 | 0.57500 |
| ## SM(d32:1)          | -0.004430 | -0.014100 | 0.005260 | 22.3 | 3.69e-01 | 0.57500 |
| ## PC(38:4)           | -0.003100 | -0.010100 | 0.003920 | 25.2 | 3.86e-01 | 0.58400 |
| ## TG(52:4)           | -0.006750 | -0.022200 | 0.008660 | 21.6 | 3.90e-01 | 0.58400 |
| ## PC(38:5)           | -0.002930 | -0.009650 | 0.003780 | 24.6 | 3.91e-01 | 0.58400 |
| ## SM(d34:1)          | 0.001860  | -0.002470 | 0.006190 | 24.9 | 3.99e-01 | 0.58700 |
| ## SM(d33:1)          | 0.004150  | -0.005770 | 0.014100 | 21.3 | 4.12e-01 | 0.59800 |
| ## TG(56:3)           | -0.008500 | -0.030900 | 0.013900 | 20.0 | 4.56e-01 | 0.65300 |
| ## TG(18:1/18:1/18:1) | -0.006390 | -0.023600 | 0.010800 | 24.8 | 4.65e-01 | 0.65600 |
| ## TG(16:0/18:2/22:6) | -0.014200 | -0.053100 | 0.024700 | 21.0 | 4.74e-01 | 0.65600 |
| ## TG(54:3)           | -0.004750 | -0.017900 | 0.008360 | 21.7 | 4.77e-01 | 0.65600 |
| ## PC(38:2)           | -0.003190 | -0.013500 | 0.007130 | 21.3 | 5.44e-01 | 0.73900 |
| ## PC(40:6)           | 0.004160  | -0.009910 | 0.018200 | 23.9 | 5.62e-01 | 0.75400 |
| ## TG(58:9)           | -0.009850 | -0.044500 | 0.024800 | 19.9 | 5.76e-01 | 0.75500 |
| ## SM(d18:2/24:1)     | 0.002410  | -0.006080 | 0.010900 | 24.0 | 5.77e-01 | 0.75500 |
| ## TG(18:2/18:1/18:1) | -0.004280 | -0.021500 | 0.013000 | 24.4 | 6.27e-01 | 0.80100 |
| ## SM(d40:2)          | 0.002030  | -0.006190 | 0.010300 | 23.7 | 6.28e-01 | 0.80100 |
| ## SM(d38:1)          | 0.002100  | -0.006660 | 0.010900 | 23.1 | 6.38e-01 | 0.80500 |
| ## TG(18:1/18:2/18:2) | -0.004810 | -0.026700 | 0.017000 | 23.6 | 6.65e-01 | 0.81300 |
| ## PC(0-38:4)         | -0.002830 | -0.015700 | 0.010000 | 21.7 | 6.65e-01 | 0.81300 |
| ## SM(d38:2)          | 0.002040  | -0.007320 | 0.011400 | 21.4 | 6.68e-01 | 0.81300 |
| ## SM(42:2)           | 0.001580  | -0.005800 | 0.008960 | 25.2 | 6.75e-01 | 0.81300 |
| ## PC(38:6)           | 0.001880  | -0.007210 | 0.011000 | 25.3 | 6.85e-01 | 0.81600 |
| ## SM(d40:1)          | 0.001860  | -0.007510 | 0.011200 | 24.0 | 6.97e-01 | 0.82100 |
| ## SM(d36:2)          | 0.001370  | -0.006720 | 0.009450 | 21.4 | 7.40e-01 | 0.86100 |
| ## PC(34:2)           | 0.003020  | -0.015400 | 0.021400 | 26.0 | 7.48e-01 | 0.86100 |
| ## TG(47:1)           | -0.002760 | -0.021900 | 0.016400 | 19.5 | 7.78e-01 | 0.88600 |

|                       |           |           |          |      |          |         |
|-----------------------|-----------|-----------|----------|------|----------|---------|
| ## LPC(20:4)          | -0.002000 | -0.016700 | 0.012700 | 21.4 | 7.89e-01 | 0.89000 |
| ## SM(d18:1/24:0)     | -0.001260 | -0.011200 | 0.008640 | 23.6 | 8.03e-01 | 0.89100 |
| ## TG(54:5)           | 0.002260  | -0.016100 | 0.020600 | 20.6 | 8.09e-01 | 0.89100 |
| ## SM(d16:1/18:1)     | -0.001010 | -0.009550 | 0.007530 | 22.8 | 8.16e-01 | 0.89100 |
| ## PC(32:0)           | 0.000682  | -0.005980 | 0.007340 | 22.5 | 8.41e-01 | 0.90900 |
| ## PC(36:5)           | -0.002100 | -0.024300 | 0.020100 | 24.3 | 8.52e-01 | 0.91300 |
| ## SM(d36:1)          | -0.000595 | -0.008270 | 0.007080 | 23.4 | 8.79e-01 | 0.93200 |
| ## TG(56:4)           | -0.001740 | -0.026800 | 0.023300 | 20.0 | 8.92e-01 | 0.93600 |
| ## LPC(18:2)          | -0.000865 | -0.015500 | 0.013800 | 24.0 | 9.08e-01 | 0.94300 |
| ## PC(37:2)           | 0.000590  | -0.015200 | 0.016300 | 19.3 | 9.41e-01 | 0.95500 |
| ## TG(18:2/18:1/16:0) | 0.000421  | -0.011600 | 0.012500 | 25.3 | 9.45e-01 | 0.95500 |
| ## PC(0-36:4)         | -0.000376 | -0.011400 | 0.010600 | 22.9 | 9.46e-01 | 0.95500 |
| ## TG(54:4)           | -0.000244 | -0.015300 | 0.014800 | 21.4 | 9.75e-01 | 0.97500 |

##  
##

## Table: Results of the crude model for the eGFR slope.  
## Shown in the table are name of the lipid (Name),  
## model coefficient (Coefficient),  
## its lower and upper confidence intervals (CI.L, CL.R),  
## average value of the variable (AveExpr),  
## p-value of the coefficient (P.Value) and  
## the p-value after correction for multiple testing (adj.P.Val).  
## The rows of the table are shown in an increasing order by the respective p-value.

| ## Name               | Coefficient | CI.L      | CI.R      | AveExpr | P.Value  | adj.P.Val |
|-----------------------|-------------|-----------|-----------|---------|----------|-----------|
| ## SM(d36:2)          | -3.15e-03   | -4.22e-03 | -2.08e-03 | 21.4    | 0.00e+00 | 1.30e-06  |
| ## SM(d34:1)          | -1.37e-03   | -1.94e-03 | -7.96e-04 | 24.9    | 3.40e-06 | 1.36e-04  |
| ## SM(d16:1/18:1)     | -2.68e-03   | -3.81e-03 | -1.55e-03 | 22.8    | 3.90e-06 | 1.36e-04  |
| ## PC(38:4)           | -2.12e-03   | -3.05e-03 | -1.19e-03 | 25.2    | 8.70e-06 | 2.31e-04  |
| ## TG(18:0/18:1/20:4) | -6.80e-03   | -1.00e-02 | -3.58e-03 | 21.3    | 3.98e-05 | 8.44e-04  |
| ## SM(d18:2/24:1)     | -2.31e-03   | -3.43e-03 | -1.18e-03 | 24.0    | 6.19e-05 | 1.09e-03  |
| ## LPC(18:2)          | 3.87e-03    | 1.94e-03  | 5.80e-03  | 24.0    | 9.59e-05 | 1.45e-03  |
| ## SM(d32:1)          | -2.45e-03   | -3.73e-03 | -1.17e-03 | 22.3    | 1.89e-04 | 2.51e-03  |
| ## SM(d18:1/24:0)     | 2.20e-03    | 8.95e-04  | 3.51e-03  | 23.6    | 1.00e-03 | 1.18e-02  |
| ## SM(d33:1)          | -2.08e-03   | -3.39e-03 | -7.67e-04 | 21.3    | 1.95e-03 | 2.06e-02  |
| ## SM(d38:2)          | -1.87e-03   | -3.11e-03 | -6.36e-04 | 21.4    | 3.08e-03 | 2.96e-02  |
| ## LPC(16:0)          | 9.24e-04    | 2.95e-04  | 1.55e-03  | 25.3    | 4.06e-03 | 3.59e-02  |
| ## SM(d36:1)          | -1.39e-03   | -2.41e-03 | -3.77e-04 | 23.4    | 7.27e-03 | 5.93e-02  |
| ## PC(32:2)           | 3.10e-03    | 7.61e-04  | 5.44e-03  | 20.7    | 9.49e-03 | 7.18e-02  |
| ## SM(d41:2)          | -1.69e-03   | -3.09e-03 | -2.87e-04 | 22.5    | 1.83e-02 | 1.29e-01  |
| ## SM(d40:2)          | -1.26e-03   | -2.35e-03 | -1.78e-04 | 23.7    | 2.26e-02 | 1.47e-01  |
| ## SM(d40:1)          | 1.43e-03    | 1.94e-04  | 2.67e-03  | 24.0    | 2.35e-02 | 1.47e-01  |
| ## TG(53:2)           | -3.20e-03   | -6.23e-03 | -1.75e-04 | 20.6    | 3.82e-02 | 2.15e-01  |
| ## PC(38:5)           | -9.37e-04   | -1.82e-03 | -4.94e-05 | 24.6    | 3.86e-02 | 2.15e-01  |
| ## TG(16:0/22:5/18:1) | -2.45e-03   | -4.86e-03 | -4.27e-05 | 22.7    | 4.61e-02 | 2.44e-01  |
| ## TG(56:6)           | -1.93e-03   | -3.89e-03 | 2.04e-05  | 19.9    | 5.24e-02 | 2.65e-01  |
| ## TG(52:2)           | -1.24e-03   | -2.54e-03 | 6.17e-05  | 22.6    | 6.19e-02 | 2.89e-01  |
| ## LPC(18:1)          | 1.42e-03    | -7.53e-05 | 2.92e-03  | 23.7    | 6.27e-02 | 2.89e-01  |
| ## LPC(18:0)          | 1.07e-03    | -8.74e-05 | 2.23e-03  | 24.0    | 6.99e-02 | 3.09e-01  |
| ## TG(56:5)           | -2.23e-03   | -4.70e-03 | 2.39e-04  | 20.3    | 7.66e-02 | 3.14e-01  |
| ## PC(0-34:3)         | 1.45e-03    | -1.58e-04 | 3.06e-03  | 21.9    | 7.70e-02 | 3.14e-01  |
| ## PC(16:0e/18:1(9Z)  | -1.18e-03   | -2.51e-03 | 1.43e-04  | 21.8    | 8.01e-02 | 3.15e-01  |
| ## PC(40:6)           | -1.64e-03   | -3.50e-03 | 2.19e-04  | 23.9    | 8.36e-02 | 3.16e-01  |

|                       |           |           |          |      |          |          |
|-----------------------|-----------|-----------|----------|------|----------|----------|
| ## PC(38:3)           | -1.27e-03 | -2.78e-03 | 2.30e-04 | 24.0 | 9.66e-02 | 3.43e-01 |
| ## TG(54:3)           | -1.47e-03 | -3.20e-03 | 2.67e-04 | 21.7 | 9.72e-02 | 3.43e-01 |
| ## PC(40:5)           | -1.37e-03 | -3.05e-03 | 2.97e-04 | 22.0 | 1.07e-01 | 3.56e-01 |
| ## PC(35:1)           | -1.30e-03 | -2.88e-03 | 2.84e-04 | 21.8 | 1.08e-01 | 3.56e-01 |
| ## TG(51:2)           | -2.12e-03 | -4.80e-03 | 5.57e-04 | 21.5 | 1.20e-01 | 3.87e-01 |
| ## TG(54:2)           | -2.23e-03 | -5.10e-03 | 6.33e-04 | 23.4 | 1.26e-01 | 3.92e-01 |
| ## SM(d41:1)          | 1.14e-03  | -3.49e-04 | 2.64e-03 | 22.7 | 1.33e-01 | 3.92e-01 |
| ## PC(37:2)           | 1.59e-03  | -4.87e-04 | 3.68e-03 | 19.3 | 1.33e-01 | 3.92e-01 |
| ## PC(0-38:6)         | -9.80e-04 | -2.29e-03 | 3.32e-04 | 20.4 | 1.43e-01 | 4.07e-01 |
| ## PC(34:2)           | -1.80e-03 | -4.23e-03 | 6.29e-04 | 26.0 | 1.46e-01 | 4.07e-01 |
| ## TG(56:3)           | -2.11e-03 | -5.07e-03 | 8.48e-04 | 20.0 | 1.62e-01 | 4.36e-01 |
| ## TG(45:0)           | 7.22e-04  | -2.96e-04 | 1.74e-03 | 23.1 | 1.64e-01 | 4.36e-01 |
| ## SM(42:2)           | -6.60e-04 | -1.64e-03 | 3.15e-04 | 25.2 | 1.84e-01 | 4.66e-01 |
| ## TG(52:3)           | -9.16e-04 | -2.28e-03 | 4.44e-04 | 22.3 | 1.86e-01 | 4.66e-01 |
| ## PC(34:3)           | 1.77e-03  | -8.73e-04 | 4.41e-03 | 22.4 | 1.89e-01 | 4.66e-01 |
| ## PC(35:2)           | 1.01e-03  | -5.97e-04 | 2.62e-03 | 21.8 | 2.17e-01 | 5.16e-01 |
| ## TG(53:3)           | -1.77e-03 | -4.58e-03 | 1.05e-03 | 20.7 | 2.19e-01 | 5.16e-01 |
| ## TG(51:1)           | -1.75e-03 | -4.61e-03 | 1.11e-03 | 20.3 | 2.31e-01 | 5.31e-01 |
| ## LPC(16:1)          | 1.14e-03  | -7.56e-04 | 3.04e-03 | 20.0 | 2.37e-01 | 5.35e-01 |
| ## TG(49:3)           | 2.00e-04  | -1.48e-04 | 5.48e-04 | 20.7 | 2.60e-01 | 5.39e-01 |
| ## TG(53:4)           | -1.76e-03 | -4.83e-03 | 1.31e-03 | 19.7 | 2.60e-01 | 5.39e-01 |
| ## TG(18:1/18:1/16:0) | -9.35e-04 | -2.67e-03 | 8.01e-04 | 25.6 | 2.90e-01 | 5.39e-01 |
| ## TG(50:2)           | -1.04e-03 | -2.97e-03 | 8.94e-04 | 21.1 | 2.91e-01 | 5.39e-01 |
| ## TG(54:4)           | -1.06e-03 | -3.04e-03 | 9.26e-04 | 21.4 | 2.95e-01 | 5.39e-01 |
| ## PC(36:4)           | -4.13e-04 | -1.19e-03 | 3.61e-04 | 26.0 | 2.95e-01 | 5.39e-01 |
| ## TG(18:1/18:1/18:1) | -1.21e-03 | -3.48e-03 | 1.06e-03 | 24.8 | 2.96e-01 | 5.39e-01 |
| ## PC(0-34:2)         | 1.06e-03  | -9.36e-04 | 3.05e-03 | 21.5 | 2.98e-01 | 5.39e-01 |
| ## PC(0-38:5)         | -6.62e-04 | -1.91e-03 | 5.88e-04 | 22.8 | 2.99e-01 | 5.39e-01 |
| ## TG(52:4)           | -1.08e-03 | -3.12e-03 | 9.59e-04 | 21.6 | 2.99e-01 | 5.39e-01 |
| ## PC(0-36:2)         | -8.03e-04 | -2.33e-03 | 7.21e-04 | 20.5 | 3.01e-01 | 5.39e-01 |
| ## TG(14:0/18:1/18:1) | -1.22e-03 | -3.53e-03 | 1.10e-03 | 24.4 | 3.02e-01 | 5.39e-01 |
| ## TG(56:7)           | -1.16e-03 | -3.38e-03 | 1.06e-03 | 19.6 | 3.05e-01 | 5.39e-01 |
| ## TG(18:2/18:2/18:2) | -1.51e-03 | -4.65e-03 | 1.62e-03 | 22.1 | 3.43e-01 | 5.96e-01 |
| ## TG(16:0/18:0/18:1) | -1.79e-03 | -5.72e-03 | 2.15e-03 | 23.1 | 3.73e-01 | 6.35e-01 |
| ## TG(18:2/22:5/16:0) | -1.78e-03 | -5.73e-03 | 2.18e-03 | 22.1 | 3.78e-01 | 6.35e-01 |
| ## TG(49:1)           | -9.96e-04 | -3.31e-03 | 1.32e-03 | 20.8 | 3.97e-01 | 6.35e-01 |
| ## TG(51:3)           | -1.17e-03 | -3.88e-03 | 1.54e-03 | 20.7 | 3.98e-01 | 6.35e-01 |
| ## TG(49:2)           | -8.76e-04 | -2.93e-03 | 1.18e-03 | 20.4 | 4.03e-01 | 6.35e-01 |
| ## PC(0-38:4)         | -7.19e-04 | -2.41e-03 | 9.76e-04 | 21.7 | 4.05e-01 | 6.35e-01 |
| ## TG(18:2/18:1/18:1) | -9.62e-04 | -3.24e-03 | 1.32e-03 | 24.4 | 4.08e-01 | 6.35e-01 |
| ## TG(18:2/18:1/16:0) | -6.62e-04 | -2.25e-03 | 9.29e-04 | 25.3 | 4.14e-01 | 6.36e-01 |
| ## TG(16:0/18:2/18:2) | -1.08e-03 | -3.80e-03 | 1.63e-03 | 24.5 | 4.33e-01 | 6.56e-01 |
| ## TG(50:3)           | -9.59e-04 | -3.49e-03 | 1.58e-03 | 23.4 | 4.58e-01 | 6.58e-01 |
| ## PC(40:7)           | -6.86e-04 | -2.50e-03 | 1.13e-03 | 21.4 | 4.58e-01 | 6.58e-01 |
| ## PC(33:1)           | -7.00e-04 | -2.55e-03 | 1.15e-03 | 20.8 | 4.58e-01 | 6.58e-01 |
| ## TG(56:4)           | -1.23e-03 | -4.54e-03 | 2.09e-03 | 20.0 | 4.67e-01 | 6.58e-01 |
| ## TG(50:1)           | -1.14e-03 | -4.21e-03 | 1.94e-03 | 24.3 | 4.69e-01 | 6.58e-01 |
| ## PC(32:0)           | -3.23e-04 | -1.20e-03 | 5.57e-04 | 22.5 | 4.72e-01 | 6.58e-01 |
| ## TG(54:6)           | -1.21e-03 | -4.60e-03 | 2.18e-03 | 19.5 | 4.83e-01 | 6.64e-01 |
| ## TG(16:0/18:2/18:3) | -1.39e-03 | -5.50e-03 | 2.72e-03 | 22.0 | 5.07e-01 | 6.81e-01 |
| ## TG(50:0)           | -1.17e-03 | -4.64e-03 | 2.30e-03 | 20.8 | 5.08e-01 | 6.81e-01 |
| ## PC(36:3)           | -4.38e-04 | -1.84e-03 | 9.66e-04 | 25.6 | 5.40e-01 | 7.16e-01 |
| ## PC(34:1)           | -3.59e-04 | -1.57e-03 | 8.49e-04 | 25.9 | 5.60e-01 | 7.32e-01 |
| ## TG(16:0/18:2/22:6) | -1.40e-03 | -6.55e-03 | 3.74e-03 | 21.0 | 5.92e-01 | 7.64e-01 |

|                       |           |           |          |      |          |          |
|-----------------------|-----------|-----------|----------|------|----------|----------|
| ## PC(38:6)           | -3.22e-04 | -1.52e-03 | 8.79e-04 | 25.3 | 5.99e-01 | 7.64e-01 |
| ## TG(52:5)           | -7.78e-04 | -3.96e-03 | 2.40e-03 | 19.8 | 6.31e-01 | 7.96e-01 |
| ## SM(d39:1)          | -3.73e-04 | -2.09e-03 | 1.35e-03 | 21.1 | 6.70e-01 | 8.28e-01 |
| ## TG(47:1)           | -5.48e-04 | -3.08e-03 | 1.99e-03 | 19.5 | 6.72e-01 | 8.28e-01 |
| ## TG(18:1/18:2/18:2) | -5.41e-04 | -3.43e-03 | 2.35e-03 | 23.6 | 7.13e-01 | 8.69e-01 |
| ## PC(32:1)           | -4.67e-04 | -3.06e-03 | 2.12e-03 | 23.3 | 7.23e-01 | 8.71e-01 |
| ## TG(54:5)           | -3.04e-04 | -2.73e-03 | 2.12e-03 | 20.6 | 8.06e-01 | 9.60e-01 |
| ## TG(14:0/16:0/18:1) | -3.46e-04 | -3.34e-03 | 2.65e-03 | 22.8 | 8.20e-01 | 9.63e-01 |
| ## LPC(20:4)          | 2.17e-04  | -1.72e-03 | 2.16e-03 | 21.4 | 8.26e-01 | 9.63e-01 |
| ## PC(0-36:3)         | -1.80e-04 | -1.89e-03 | 1.53e-03 | 20.4 | 8.37e-01 | 9.64e-01 |
| ## TG(48:3)           | 3.90e-04  | -3.73e-03 | 4.51e-03 | 20.5 | 8.53e-01 | 9.72e-01 |
| ## PC(36:5)           | -2.48e-04 | -3.18e-03 | 2.68e-03 | 24.3 | 8.68e-01 | 9.79e-01 |
| ## TG(46:0)           | 1.58e-04  | -2.61e-03 | 2.92e-03 | 20.4 | 9.11e-01 | 9.92e-01 |
| ## TG(18:1/18:1/22:6) | -2.27e-04 | -4.74e-03 | 4.28e-03 | 20.7 | 9.21e-01 | 9.92e-01 |
| ## TG(58:9)           | 2.28e-04  | -4.35e-03 | 4.80e-03 | 19.9 | 9.22e-01 | 9.92e-01 |
| ## TG(18:1/12:0/18:1) | -9.00e-05 | -3.17e-03 | 2.99e-03 | 22.4 | 9.54e-01 | 9.92e-01 |
| ## SM(d38:1)          | 3.02e-05  | -1.13e-03 | 1.19e-03 | 23.1 | 9.59e-01 | 9.92e-01 |
| ## TG(14:0/18:2/18:2) | -9.44e-05 | -3.72e-03 | 3.53e-03 | 21.1 | 9.59e-01 | 9.92e-01 |
| ## PC(36:2)           | 2.17e-05  | -9.91e-04 | 1.03e-03 | 26.1 | 9.66e-01 | 9.92e-01 |
| ## PC(38:2)           | -2.20e-05 | -1.39e-03 | 1.34e-03 | 21.3 | 9.75e-01 | 9.92e-01 |
| ## PC(0-36:5)         | -1.46e-05 | -1.37e-03 | 1.34e-03 | 22.3 | 9.83e-01 | 9.92e-01 |
| ## PC(0-36:4)         | 8.80e-06  | -1.45e-03 | 1.46e-03 | 22.9 | 9.90e-01 | 9.92e-01 |
| ## TG(46:1)           | -1.82e-05 | -3.05e-03 | 3.01e-03 | 21.2 | 9.91e-01 | 9.92e-01 |
| ## TG(46:2)           | -1.67e-05 | -3.26e-03 | 3.22e-03 | 20.1 | 9.92e-01 | 9.92e-01 |

### 1.2.1.2 Heatmaps

```
##   Label Relation p.adj
## 1    # p.adj < 0.01
## 2    x p.adj < 0.05
## 3    * p.adj < 0.10
```



# slope\_gfr\_profil

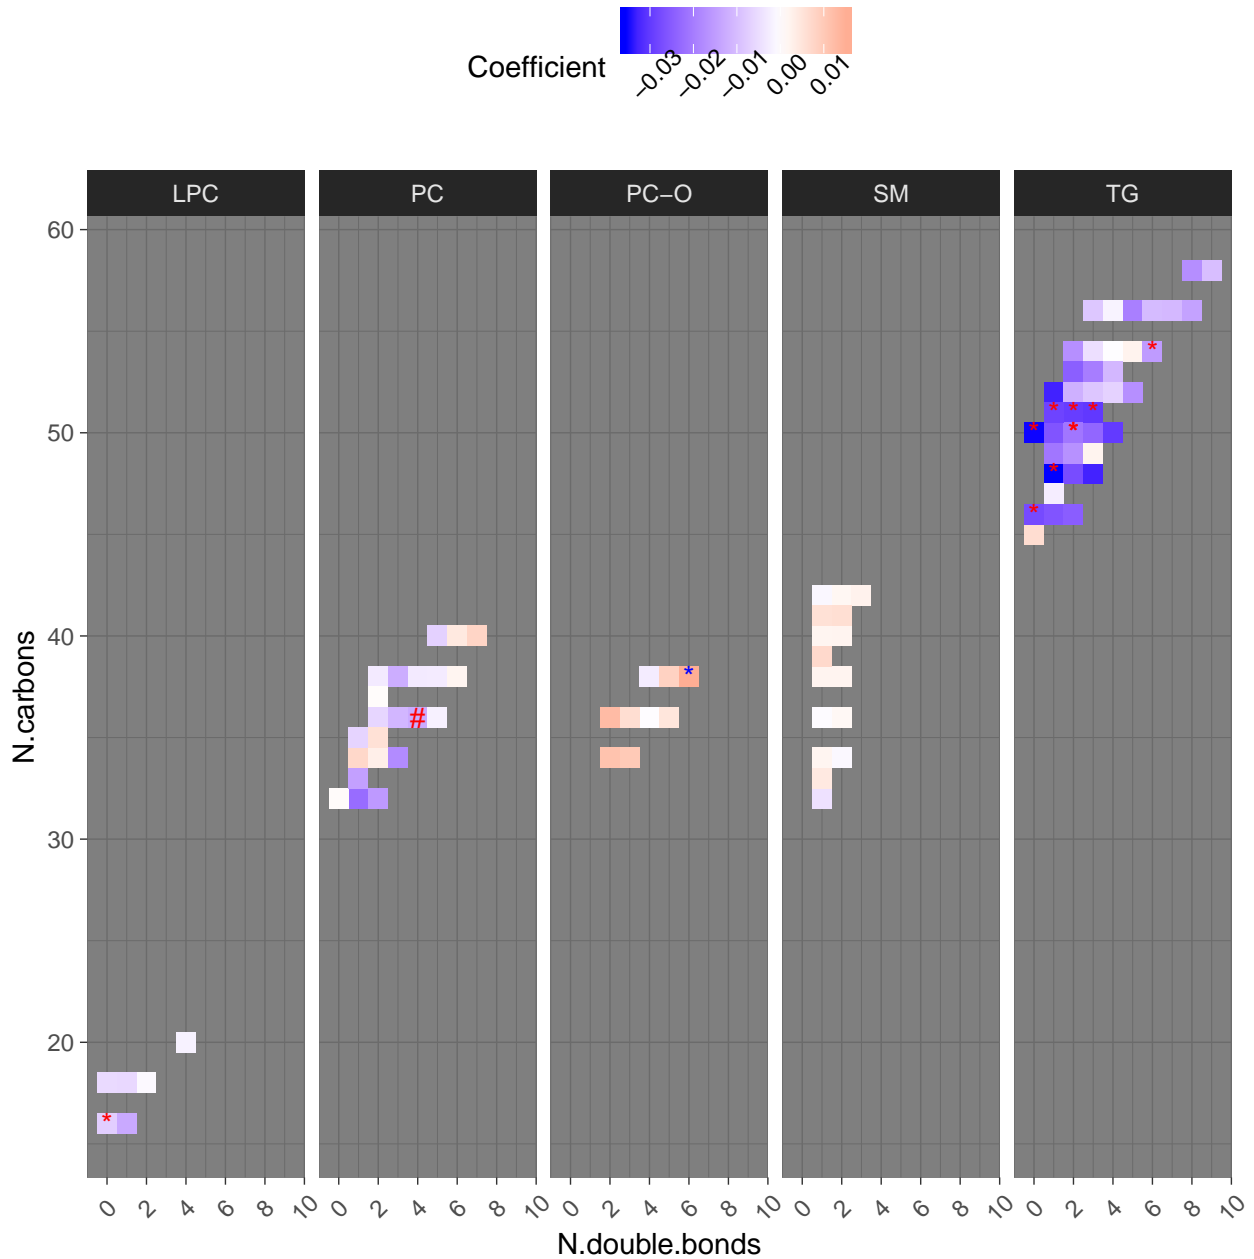

Figure 9: Heatmap of the lipid-specific model coefficients from the crude model for eGFR slope. The name of the group is shown in the title of the figure in the top-left corner. Lipids are organized into panels (columns) by their class (from LPC to TG). One colored rectangle corresponds to one lipid species, where the coordinates in the x-axis and y-axis, respectively, show the number of double bonds (N.double.bonds) and the number of carbon atoms (N.carbons) in the fatty acid chains of the lipid. The number of double bonds corresponds to the number of unsaturated bonds in the fatty acid chains, and the number of carbon atoms corresponds to the length of the fatty acid chains and, thus, the size of the lipid. The magnitude of the lipid-specific model coefficient is shown as the color of the rectangle (blue: negative; red: positive). Coefficient with statistical significance are annotated with symbols #, x and \*, respectively, corresponding to  $p < 0.01$ ,  $p < 0.05$  and  $p < 0.1$ .

## 1.2.2 Albuminuria Slope

### 1.2.2.1 Table

```
##
##
## Table: Results of the crude model for the continuous albuminuria (logUAER) slope.
## Shown in the table are name of the lipid (Name),
## model coefficient (Coefficient),
## its lower and upper confidence intervals (CI.L, CL.R),
## average value of the variable (AveExpr),
## p-value of the coefficient (P.Value) and
## the p-value after correction for multiple testing (adj.P.Val).
## The rows of the table are shown in an increasing order by the respective p-value.
##
```

| ## Name               | Coefficient | CI.L    | CI.R      | AveExpr | P.Value  | adj.P.Val |
|-----------------------|-------------|---------|-----------|---------|----------|-----------|
| ## LPC(18:2)          | -0.297000   | -0.4640 | -0.130000 | 24.0    | 0.000511 | 0.0315    |
| ## PC(0-36:5)         | -0.193000   | -0.3030 | -0.083500 | 22.3    | 0.000595 | 0.0315    |
| ## PC(0-36:4)         | -0.201000   | -0.3200 | -0.081300 | 22.9    | 0.001030 | 0.0364    |
| ## PC(0-38:5)         | -0.164000   | -0.2680 | -0.060700 | 22.8    | 0.001940 | 0.0505    |
| ## PC(0-38:6)         | -0.167000   | -0.2760 | -0.058800 | 20.4    | 0.002570 | 0.0505    |
| ## PC(0-38:4)         | -0.210000   | -0.3490 | -0.071200 | 21.7    | 0.003090 | 0.0505    |
| ## SM(d18:1/24:0)     | -0.168000   | -0.2800 | -0.056000 | 23.6    | 0.003340 | 0.0505    |
| ## PC(0-34:3)         | -0.188000   | -0.3190 | -0.056700 | 21.9    | 0.005100 | 0.0676    |
| ## PC(0-34:2)         | -0.232000   | -0.3990 | -0.066400 | 21.5    | 0.006180 | 0.0728    |
| ## SM(d40:1)          | -0.138000   | -0.2450 | -0.031400 | 24.0    | 0.011300 | 0.1200    |
| ## LPC(20:4)          | -0.200000   | -0.3660 | -0.034300 | 21.4    | 0.018200 | 0.1750    |
| ## SM(d38:1)          | -0.113000   | -0.2130 | -0.012100 | 23.1    | 0.028200 | 0.2490    |
| ## LPC(18:1)          | -0.137000   | -0.2640 | -0.009630 | 23.7    | 0.035000 | 0.2860    |
| ## SM(d41:1)          | -0.129000   | -0.2560 | -0.000812 | 22.7    | 0.048600 | 0.3680    |
| ## LPC(16:0)          | -0.049600   | -0.1050 | 0.005320  | 25.3    | 0.076600 | 0.5130    |
| ## LPC(18:0)          | -0.089500   | -0.1890 | 0.009880  | 24.0    | 0.077400 | 0.5130    |
| ## SM(d39:1)          | -0.130000   | -0.2810 | 0.020500  | 21.1    | 0.090200 | 0.5630    |
| ## PC(0-36:3)         | -0.112000   | -0.2540 | 0.030700  | 20.4    | 0.124000 | 0.7310    |
| ## PC(36:2)           | -0.059700   | -0.1390 | 0.019400  | 26.1    | 0.139000 | 0.7740    |
| ## PC(32:1)           | 0.160000    | -0.0605 | 0.381000  | 23.3    | 0.154000 | 0.8040    |
| ## TG(54:6)           | 0.202000    | -0.0843 | 0.489000  | 19.5    | 0.166000 | 0.8040    |
| ## TG(49:3)           | -0.021900   | -0.0530 | 0.009180  | 20.7    | 0.167000 | 0.8040    |
| ## PC(32:0)           | 0.051700    | -0.0235 | 0.127000  | 22.5    | 0.177000 | 0.8040    |
| ## PC(34:1)           | -0.074200   | -0.1830 | 0.034900  | 25.9    | 0.182000 | 0.8040    |
| ## PC(37:2)           | -0.118000   | -0.2960 | 0.060600  | 19.3    | 0.195000 | 0.8050    |
| ## TG(50:2)           | 0.110000    | -0.0574 | 0.277000  | 21.1    | 0.197000 | 0.8050    |
| ## TG(14:0/18:1/18:1) | 0.122000    | -0.0781 | 0.323000  | 24.4    | 0.231000 | 0.8930    |
| ## PC(38:5)           | -0.045300   | -0.1200 | 0.029700  | 24.6    | 0.236000 | 0.8930    |
| ## SM(d38:2)          | -0.063700   | -0.1710 | 0.043900  | 21.4    | 0.245000 | 0.8960    |
| ## SM(d32:1)          | 0.061500    | -0.0491 | 0.172000  | 22.3    | 0.275000 | 0.9570    |
| ## TG(50:0)           | 0.160000    | -0.1390 | 0.460000  | 20.8    | 0.293000 | 0.9570    |
| ## TG(14:0/16:0/18:1) | 0.136000    | -0.1230 | 0.395000  | 22.8    | 0.303000 | 0.9570    |
| ## TG(18:1/18:1/16:0) | 0.076300    | -0.0735 | 0.226000  | 25.6    | 0.317000 | 0.9570    |
| ## PC(0-36:2)         | -0.065000   | -0.1940 | 0.063700  | 20.5    | 0.322000 | 0.9570    |
| ## PC(36:3)           | -0.058200   | -0.1770 | 0.060400  | 25.6    | 0.335000 | 0.9570    |
| ## TG(50:3)           | 0.104000    | -0.1160 | 0.323000  | 23.4    | 0.354000 | 0.9570    |
| ## SM(d40:2)          | -0.043200   | -0.1370 | 0.050500  | 23.7    | 0.366000 | 0.9570    |
| ## TG(14:0/18:2/18:2) | 0.143000    | -0.1710 | 0.457000  | 21.2    | 0.371000 | 0.9570    |
| ## SM(d18:2/24:1)     | 0.043600    | -0.0538 | 0.141000  | 24.0    | 0.379000 | 0.9570    |

|                       |           |         |          |      |          |        |
|-----------------------|-----------|---------|----------|------|----------|--------|
| ## PC(35:2)           | -0.061400 | -0.1990 | 0.076600 | 21.8 | 0.383000 | 0.9570 |
| ## SM(d16:1/18:1)     | 0.043500  | -0.0547 | 0.142000 | 22.8 | 0.385000 | 0.9570 |
| ## TG(18:1/12:0/18:1) | 0.118000  | -0.1490 | 0.385000 | 22.5 | 0.386000 | 0.9570 |
| ## TG(18:2/18:1/16:0) | 0.059500  | -0.0759 | 0.195000 | 25.3 | 0.388000 | 0.9570 |
| ## TG(56:7)           | 0.078800  | -0.1060 | 0.264000 | 19.6 | 0.403000 | 0.9570 |
| ## TG(18:2/18:2/18:2) | 0.107000  | -0.1590 | 0.373000 | 22.1 | 0.428000 | 0.9570 |
| ## SM(d34:1)          | 0.019400  | -0.0300 | 0.068900 | 24.9 | 0.440000 | 0.9570 |
| ## TG(16:0/18:0/18:1) | 0.132000  | -0.2070 | 0.470000 | 23.1 | 0.444000 | 0.9570 |
| ## TG(18:0/18:1/20:4) | 0.100000  | -0.1680 | 0.369000 | 21.3 | 0.463000 | 0.9570 |
| ## TG(18:2/22:5/16:0) | 0.125000  | -0.2090 | 0.459000 | 22.1 | 0.464000 | 0.9570 |
| ## TG(49:2)           | 0.066200  | -0.1130 | 0.245000 | 20.4 | 0.469000 | 0.9570 |
| ## PC(40:7)           | -0.054800 | -0.2090 | 0.099600 | 21.4 | 0.486000 | 0.9570 |
| ## PC(16:0e/18:1(9Z)) | -0.038200 | -0.1510 | 0.074900 | 21.8 | 0.507000 | 0.9570 |
| ## TG(46:0)           | 0.079600  | -0.1610 | 0.320000 | 20.4 | 0.515000 | 0.9570 |
| ## LPC(16:1)          | 0.051300  | -0.1130 | 0.215000 | 20.0 | 0.539000 | 0.9570 |
| ## PC(36:4)           | -0.020300 | -0.0874 | 0.046800 | 26.0 | 0.553000 | 0.9570 |
| ## PC(34:3)           | -0.069400 | -0.2990 | 0.160000 | 22.4 | 0.553000 | 0.9570 |
| ## TG(56:3)           | 0.075500  | -0.1770 | 0.328000 | 20.0 | 0.558000 | 0.9570 |
| ## TG(56:6)           | -0.048600 | -0.2120 | 0.115000 | 19.9 | 0.559000 | 0.9570 |
| ## TG(45:0)           | -0.025900 | -0.1130 | 0.061600 | 23.1 | 0.561000 | 0.9570 |
| ## TG(16:0/18:2/18:2) | 0.066300  | -0.1690 | 0.302000 | 24.5 | 0.581000 | 0.9570 |
| ## PC(33:1)           | 0.044400  | -0.1160 | 0.205000 | 20.9 | 0.587000 | 0.9570 |
| ## TG(48:3)           | 0.097500  | -0.2640 | 0.459000 | 20.5 | 0.596000 | 0.9570 |
| ## TG(52:5)           | -0.075100 | -0.3540 | 0.204000 | 19.8 | 0.598000 | 0.9570 |
| ## TG(16:0/18:2/22:6) | 0.115000  | -0.3190 | 0.548000 | 21.0 | 0.603000 | 0.9570 |
| ## PC(38:4)           | -0.020300 | -0.0993 | 0.058700 | 25.2 | 0.614000 | 0.9570 |
| ## PC(38:6)           | -0.024700 | -0.1250 | 0.075700 | 25.4 | 0.629000 | 0.9570 |
| ## SM(d41:2)          | -0.029200 | -0.1500 | 0.091900 | 22.5 | 0.636000 | 0.9570 |
| ## TG(51:1)           | 0.059200  | -0.1900 | 0.308000 | 20.3 | 0.641000 | 0.9570 |
| ## PC(40:6)           | 0.037000  | -0.1200 | 0.194000 | 24.0 | 0.643000 | 0.9570 |
| ## PC(35:1)           | -0.032000 | -0.1680 | 0.104000 | 21.8 | 0.645000 | 0.9570 |
| ## TG(18:1/18:2/18:2) | 0.056600  | -0.1900 | 0.304000 | 23.6 | 0.652000 | 0.9570 |
| ## TG(54:2)           | 0.056100  | -0.1890 | 0.302000 | 23.4 | 0.654000 | 0.9570 |
| ## TG(16:0/18:2/18:3) | 0.079200  | -0.2750 | 0.434000 | 22.0 | 0.661000 | 0.9570 |
| ## TG(51:2)           | 0.049200  | -0.1840 | 0.283000 | 21.5 | 0.679000 | 0.9570 |
| ## SM(d36:2)          | 0.019600  | -0.0749 | 0.114000 | 21.4 | 0.683000 | 0.9570 |
| ## TG(46:1)           | 0.052000  | -0.2100 | 0.314000 | 21.2 | 0.697000 | 0.9570 |
| ## TG(53:4)           | 0.051700  | -0.2150 | 0.318000 | 19.7 | 0.704000 | 0.9570 |
| ## PC(38:2)           | -0.022100 | -0.1380 | 0.093800 | 21.3 | 0.708000 | 0.9570 |
| ## TG(54:3)           | 0.027600  | -0.1200 | 0.175000 | 21.7 | 0.714000 | 0.9570 |
| ## TG(46:2)           | 0.049700  | -0.2310 | 0.330000 | 20.1 | 0.728000 | 0.9570 |
| ## TG(54:4)           | -0.029300 | -0.1980 | 0.139000 | 21.4 | 0.733000 | 0.9570 |
| ## TG(54:5)           | -0.033900 | -0.2410 | 0.173000 | 20.6 | 0.747000 | 0.9570 |
| ## PC(32:2)           | 0.031300  | -0.1680 | 0.231000 | 20.7 | 0.758000 | 0.9570 |
| ## TG(49:1)           | 0.030600  | -0.1710 | 0.233000 | 20.9 | 0.766000 | 0.9570 |
| ## TG(52:4)           | -0.025900 | -0.2000 | 0.148000 | 21.6 | 0.769000 | 0.9570 |
| ## TG(56:4)           | 0.041000  | -0.2420 | 0.324000 | 20.0 | 0.776000 | 0.9570 |
| ## SM(d36:1)          | -0.010700 | -0.0989 | 0.077500 | 23.4 | 0.812000 | 0.9780 |
| ## TG(50:1)           | 0.029100  | -0.2350 | 0.293000 | 24.3 | 0.829000 | 0.9780 |
| ## TG(47:1)           | 0.020700  | -0.1990 | 0.240000 | 19.5 | 0.853000 | 0.9780 |
| ## PC(36:5)           | -0.021000 | -0.2650 | 0.223000 | 24.4 | 0.866000 | 0.9780 |
| ## TG(56:5)           | 0.016400  | -0.1940 | 0.227000 | 20.3 | 0.879000 | 0.9780 |
| ## TG(52:2)           | 0.007520  | -0.1030 | 0.118000 | 22.6 | 0.894000 | 0.9780 |
| ## PC(40:5)           | 0.009250  | -0.1320 | 0.150000 | 22.0 | 0.898000 | 0.9780 |

|                       |           |         |          |      |          |        |
|-----------------------|-----------|---------|----------|------|----------|--------|
| ## SM(d33:1)          | 0.007250  | -0.1070 | 0.121000 | 21.3 | 0.901000 | 0.9780 |
| ## PC(34:2)           | 0.012200  | -0.1910 | 0.216000 | 26.0 | 0.906000 | 0.9780 |
| ## TG(58:9)           | -0.021700 | -0.4130 | 0.370000 | 19.9 | 0.913000 | 0.9780 |
| ## TG(52:3)           | -0.005900 | -0.1220 | 0.110000 | 22.3 | 0.921000 | 0.9780 |
| ## TG(18:2/18:1/18:1) | 0.009110  | -0.1870 | 0.205000 | 24.4 | 0.927000 | 0.9780 |
| ## TG(53:2)           | 0.012000  | -0.2510 | 0.275000 | 20.7 | 0.929000 | 0.9780 |
| ## TG(53:3)           | -0.010800 | -0.2560 | 0.235000 | 20.7 | 0.931000 | 0.9780 |
| ## SM(42:2)           | 0.003660  | -0.0801 | 0.087400 | 25.2 | 0.932000 | 0.9780 |
| ## TG(51:3)           | -0.003930 | -0.2420 | 0.234000 | 20.7 | 0.974000 | 0.9910 |
| ## TG(18:1/18:1/18:1) | 0.002960  | -0.1920 | 0.197000 | 24.8 | 0.976000 | 0.9910 |
| ## TG(18:1/18:1/22:6) | 0.004370  | -0.3760 | 0.385000 | 20.7 | 0.982000 | 0.9910 |
| ## TG(16:0/22:5/18:1) | 0.002120  | -0.2010 | 0.205000 | 22.7 | 0.984000 | 0.9910 |
| ## PC(38:3)           | 0.000719  | -0.1280 | 0.129000 | 24.0 | 0.991000 | 0.9910 |

##  
##

## Table: Results of the crude model for the continuous albuminuria (logUAER) slope.  
## Shown in the table are name of the lipid (Name),  
## model coefficient (Coefficient),  
## its lower and upper confidence intervals (CI.L, CL.R),  
## average value of the variable (AveExpr),  
## p-value of the coefficient (P.Value) and  
## the p-value after correction for multiple testing (adj.P.Val).  
## The rows of the table are shown in an increasing order by the respective p-value.

| ## Name               | Coefficient | CI.L      | CI.R      | AveExpr | P.Value  | adj.P.Val |
|-----------------------|-------------|-----------|-----------|---------|----------|-----------|
| ## PC(0-34:3)         | -5.47e-02   | -0.073200 | -0.036100 | 21.9    | 0.00e+00 | 1.40e-06  |
| ## PC(0-36:3)         | -4.66e-02   | -0.066700 | -0.026500 | 20.4    | 6.80e-06 | 3.62e-04  |
| ## PC(0-36:2)         | -3.84e-02   | -0.056700 | -0.020200 | 20.5    | 3.96e-05 | 1.40e-03  |
| ## PC(0-34:2)         | -4.72e-02   | -0.070700 | -0.023700 | 21.5    | 9.11e-05 | 2.41e-03  |
| ## TG(45:0)           | -2.30e-02   | -0.035300 | -0.010600 | 23.1    | 3.00e-04 | 6.35e-03  |
| ## SM(d18:1/24:0)     | -2.65e-02   | -0.042300 | -0.010700 | 23.6    | 1.07e-03 | 1.89e-02  |
| ## TG(52:2)           | 2.58e-02    | 0.010100  | 0.041500  | 22.6    | 1.32e-03 | 2.00e-02  |
| ## SM(d41:1)          | -2.91e-02   | -0.047200 | -0.011000 | 22.7    | 1.67e-03 | 2.22e-02  |
| ## SM(d40:1)          | -2.35e-02   | -0.038600 | -0.008370 | 24.0    | 2.40e-03 | 2.82e-02  |
| ## TG(14:0/18:1/18:1) | 4.16e-02    | 0.013200  | 0.069900  | 24.4    | 4.14e-03 | 4.13e-02  |
| ## TG(50:2)           | 3.43e-02    | 0.010600  | 0.057900  | 21.1    | 4.57e-03 | 4.13e-02  |
| ## PC(16:0e/18:1(9Z)  | -2.31e-02   | -0.039200 | -0.007140 | 21.8    | 4.68e-03 | 4.13e-02  |
| ## LPC(18:2)          | -3.32e-02   | -0.056800 | -0.009560 | 24.0    | 5.99e-03 | 4.61e-02  |
| ## PC(0-38:6)         | -2.15e-02   | -0.036900 | -0.006170 | 20.4    | 6.09e-03 | 4.61e-02  |
| ## TG(56:3)           | 4.96e-02    | 0.013900  | 0.085400  | 20.0    | 6.63e-03 | 4.69e-02  |
| ## TG(49:3)           | -5.97e-03   | -0.010400 | -0.001580 | 20.7    | 7.85e-03 | 5.05e-02  |
| ## TG(53:2)           | 5.03e-02    | 0.013100  | 0.087600  | 20.7    | 8.19e-03 | 5.05e-02  |
| ## TG(51:2)           | 4.41e-02    | 0.011100  | 0.077100  | 21.5    | 8.99e-03 | 5.05e-02  |
| ## TG(18:2/22:5/16:0) | 6.30e-02    | 0.015800  | 0.110000  | 22.1    | 9.06e-03 | 5.05e-02  |
| ## TG(54:6)           | 5.34e-02    | 0.012800  | 0.093900  | 19.5    | 9.97e-03 | 5.17e-02  |
| ## TG(56:6)           | 3.01e-02    | 0.007050  | 0.053200  | 19.9    | 1.06e-02 | 5.17e-02  |
| ## TG(54:2)           | 4.53e-02    | 0.010500  | 0.080000  | 23.4    | 1.07e-02 | 5.17e-02  |
| ## TG(18:1/18:1/16:0) | 2.74e-02    | 0.006170  | 0.048500  | 25.6    | 1.15e-02 | 5.29e-02  |
| ## TG(56:7)           | 3.32e-02    | 0.006980  | 0.059300  | 19.6    | 1.32e-02 | 5.81e-02  |
| ## TG(18:2/18:2/18:2) | 4.69e-02    | 0.009230  | 0.084500  | 22.1    | 1.48e-02 | 6.26e-02  |
| ## TG(56:5)           | 3.61e-02    | 0.006300  | 0.066000  | 20.3    | 1.77e-02 | 7.21e-02  |
| ## PC(37:2)           | -3.02e-02   | -0.055500 | -0.005020 | 19.3    | 1.89e-02 | 7.41e-02  |
| ## SM(d39:1)          | -2.52e-02   | -0.046600 | -0.003880 | 21.1    | 2.07e-02 | 7.48e-02  |

|                       |           |           |           |      |          |          |
|-----------------------|-----------|-----------|-----------|------|----------|----------|
| ## PC(36:2)           | -1.32e-02 | -0.024400 | -0.002010 | 26.1 | 2.08e-02 | 7.48e-02 |
| ## PC(38:4)           | 1.32e-02  | 0.001980  | 0.024300  | 25.2 | 2.12e-02 | 7.48e-02 |
| ## PC(35:2)           | -2.28e-02 | -0.042300 | -0.003280 | 21.8 | 2.22e-02 | 7.58e-02 |
| ## TG(50:1)           | 4.24e-02  | 0.005050  | 0.079700  | 24.3 | 2.62e-02 | 8.47e-02 |
| ## TG(16:0/22:5/18:1) | 3.26e-02  | 0.003850  | 0.061400  | 22.7 | 2.64e-02 | 8.47e-02 |
| ## TG(50:3)           | 3.44e-02  | 0.003410  | 0.065500  | 23.4 | 2.97e-02 | 9.25e-02 |
| ## TG(16:0/18:0/18:1) | 5.28e-02  | 0.004870  | 0.101000  | 23.1 | 3.09e-02 | 9.36e-02 |
| ## TG(54:3)           | 2.25e-02  | 0.001580  | 0.043400  | 21.7 | 3.51e-02 | 1.03e-01 |
| ## PC(32:2)           | -2.95e-02 | -0.057700 | -0.001290 | 20.7 | 4.04e-02 | 1.15e-01 |
| ## TG(51:1)           | 3.67e-02  | 0.001470  | 0.072000  | 20.3 | 4.12e-02 | 1.15e-01 |
| ## PC(40:7)           | -2.22e-02 | -0.044000 | -0.000309 | 21.4 | 4.69e-02 | 1.27e-01 |
| ## TG(53:3)           | 3.44e-02  | -0.000368 | 0.069200  | 20.7 | 5.25e-02 | 1.39e-01 |
| ## TG(14:0/16:0/18:1) | 3.59e-02  | -0.000813 | 0.072500  | 22.8 | 5.53e-02 | 1.43e-01 |
| ## TG(52:3)           | 1.57e-02  | -0.000783 | 0.032100  | 22.3 | 6.19e-02 | 1.55e-01 |
| ## TG(18:1/12:0/18:1) | 3.58e-02  | -0.001920 | 0.073600  | 22.5 | 6.28e-02 | 1.55e-01 |
| ## SM(d36:2)          | 1.21e-02  | -0.001220 | 0.025500  | 21.4 | 7.49e-02 | 1.78e-01 |
| ## TG(56:4)           | 3.63e-02  | -0.003790 | 0.076400  | 20.0 | 7.59e-02 | 1.78e-01 |
| ## TG(52:4)           | 2.21e-02  | -0.002430 | 0.046700  | 21.6 | 7.73e-02 | 1.78e-01 |
| ## TG(18:0/18:1/20:4) | 3.31e-02  | -0.004890 | 0.071200  | 21.3 | 8.75e-02 | 1.97e-01 |
| ## SM(d38:1)          | -1.23e-02 | -0.026500 | 0.001910  | 23.1 | 8.96e-02 | 1.97e-01 |
| ## PC(38:3)           | 1.57e-02  | -0.002520 | 0.033800  | 24.0 | 9.13e-02 | 1.97e-01 |
| ## TG(49:1)           | 2.42e-02  | -0.004330 | 0.052800  | 20.9 | 9.62e-02 | 2.04e-01 |
| ## PC(0-36:5)         | -1.29e-02 | -0.028500 | 0.002630  | 22.3 | 1.03e-01 | 2.14e-01 |
| ## SM(d34:1)          | 5.65e-03  | -0.001340 | 0.012600  | 24.9 | 1.13e-01 | 2.28e-01 |
| ## LPC(20:4)          | 1.89e-02  | -0.004560 | 0.042400  | 21.4 | 1.14e-01 | 2.28e-01 |
| ## SM(d41:2)          | -1.37e-02 | -0.030800 | 0.003430  | 22.5 | 1.17e-01 | 2.29e-01 |
| ## TG(49:2)           | 2.02e-02  | -0.005190 | 0.045600  | 20.4 | 1.19e-01 | 2.29e-01 |
| ## TG(50:0)           | 3.31e-02  | -0.009280 | 0.075400  | 20.8 | 1.26e-01 | 2.36e-01 |
| ## TG(51:3)           | 2.62e-02  | -0.007450 | 0.059800  | 20.7 | 1.27e-01 | 2.36e-01 |
| ## PC(32:0)           | -8.09e-03 | -0.018700 | 0.002550  | 22.5 | 1.36e-01 | 2.48e-01 |
| ## PC(34:2)           | 2.17e-02  | -0.007100 | 0.050400  | 26.0 | 1.40e-01 | 2.51e-01 |
| ## TG(46:2)           | 2.79e-02  | -0.011700 | 0.067600  | 20.1 | 1.67e-01 | 2.95e-01 |
| ## TG(46:1)           | 2.53e-02  | -0.011800 | 0.062300  | 21.2 | 1.81e-01 | 3.14e-01 |
| ## TG(46:0)           | 2.27e-02  | -0.011300 | 0.056700  | 20.4 | 1.90e-01 | 3.25e-01 |
| ## PC(38:6)           | -9.29e-03 | -0.023500 | 0.004910  | 25.4 | 1.99e-01 | 3.35e-01 |
| ## SM(d40:2)          | -8.41e-03 | -0.021700 | 0.004850  | 23.7 | 2.13e-01 | 3.53e-01 |
| ## LPC(16:1)          | 1.39e-02  | -0.009360 | 0.037100  | 20.0 | 2.41e-01 | 3.94e-01 |
| ## TG(14:0/18:2/18:2) | 2.63e-02  | -0.018100 | 0.070700  | 21.2 | 2.45e-01 | 3.94e-01 |
| ## SM(d33:1)          | -9.27e-03 | -0.025400 | 0.006890  | 21.3 | 2.60e-01 | 4.11e-01 |
| ## TG(16:0/18:2/18:2) | 1.90e-02  | -0.014400 | 0.052300  | 24.5 | 2.64e-01 | 4.11e-01 |
| ## PC(0-38:5)         | -7.95e-03 | -0.022600 | 0.006720  | 22.8 | 2.87e-01 | 4.42e-01 |
| ## PC(32:1)           | 1.67e-02  | -0.014600 | 0.047900  | 23.3 | 2.96e-01 | 4.46e-01 |
| ## TG(16:0/18:2/18:3) | 2.66e-02  | -0.023600 | 0.076700  | 22.0 | 2.99e-01 | 4.46e-01 |
| ## PC(0-38:4)         | -1.03e-02 | -0.029900 | 0.009370  | 21.7 | 3.05e-01 | 4.49e-01 |
| ## SM(d38:2)          | -7.68e-03 | -0.022900 | 0.007550  | 21.4 | 3.22e-01 | 4.68e-01 |
| ## TG(48:3)           | 2.44e-02  | -0.026600 | 0.075500  | 20.5 | 3.48e-01 | 4.98e-01 |
| ## PC(40:5)           | 9.34e-03  | -0.010600 | 0.029300  | 22.0 | 3.58e-01 | 5.06e-01 |
| ## TG(18:1/18:1/22:6) | 2.47e-02  | -0.029100 | 0.078500  | 20.7 | 3.67e-01 | 5.12e-01 |
| ## TG(53:4)           | 1.70e-02  | -0.020700 | 0.054700  | 19.7 | 3.77e-01 | 5.19e-01 |
| ## TG(18:1/18:1/18:1) | 1.17e-02  | -0.015800 | 0.039200  | 24.8 | 4.04e-01 | 5.50e-01 |
| ## TG(52:5)           | 1.57e-02  | -0.023800 | 0.055200  | 19.8 | 4.34e-01 | 5.83e-01 |
| ## PC(36:5)           | -1.26e-02 | -0.047100 | 0.022000  | 24.4 | 4.74e-01 | 6.28e-01 |
| ## SM(d32:1)          | 5.53e-03  | -0.010100 | 0.021200  | 22.3 | 4.88e-01 | 6.38e-01 |
| ## TG(54:4)           | 7.72e-03  | -0.016100 | 0.031600  | 21.4 | 5.25e-01 | 6.79e-01 |

|                       |           |           |          |      |          |          |
|-----------------------|-----------|-----------|----------|------|----------|----------|
| ## TG(54:5)           | 8.30e-03  | -0.020900 | 0.037500 | 20.6 | 5.77e-01 | 7.37e-01 |
| ## TG(18:2/18:1/18:1) | 5.40e-03  | -0.022400 | 0.033200 | 24.4 | 7.03e-01 | 8.70e-01 |
| ## TG(16:0/18:2/22:6) | 1.18e-02  | -0.049500 | 0.073100 | 21.0 | 7.05e-01 | 8.70e-01 |
| ## PC(38:2)           | -3.07e-03 | -0.019500 | 0.013300 | 21.3 | 7.13e-01 | 8.70e-01 |
| ## LPC(18:1)          | 3.32e-03  | -0.014700 | 0.021300 | 23.7 | 7.17e-01 | 8.70e-01 |
| ## PC(34:3)           | -5.83e-03 | -0.038300 | 0.026700 | 22.4 | 7.25e-01 | 8.70e-01 |
| ## SM(d36:1)          | 2.19e-03  | -0.010300 | 0.014700 | 23.4 | 7.30e-01 | 8.70e-01 |
| ## SM(d16:1/18:1)     | 2.20e-03  | -0.011700 | 0.016100 | 22.8 | 7.56e-01 | 8.83e-01 |
| ## TG(18:1/18:2/18:2) | 5.47e-03  | -0.029500 | 0.040400 | 23.6 | 7.58e-01 | 8.83e-01 |
| ## SM(42:2)           | -1.63e-03 | -0.013500 | 0.010200 | 25.2 | 7.88e-01 | 8.94e-01 |
| ## PC(36:4)           | 1.20e-03  | -0.008290 | 0.010700 | 26.0 | 8.04e-01 | 8.94e-01 |
| ## PC(38:5)           | -1.30e-03 | -0.011900 | 0.009310 | 24.6 | 8.10e-01 | 8.94e-01 |
| ## TG(47:1)           | -3.70e-03 | -0.034800 | 0.027400 | 19.5 | 8.15e-01 | 8.94e-01 |
| ## PC(34:1)           | 1.74e-03  | -0.013700 | 0.017200 | 25.9 | 8.25e-01 | 8.94e-01 |
| ## TG(58:9)           | 6.24e-03  | -0.049200 | 0.061600 | 19.9 | 8.25e-01 | 8.94e-01 |
| ## PC(36:3)           | -1.84e-03 | -0.018600 | 0.015000 | 25.6 | 8.30e-01 | 8.94e-01 |
| ## LPC(16:0)          | 8.10e-04  | -0.006960 | 0.008580 | 25.3 | 8.38e-01 | 8.94e-01 |
| ## LPC(18:0)          | -1.41e-03 | -0.015500 | 0.012700 | 24.0 | 8.44e-01 | 8.94e-01 |
| ## PC(40:6)           | -1.74e-03 | -0.023900 | 0.020400 | 24.0 | 8.78e-01 | 9.14e-01 |
| ## TG(18:2/18:1/16:0) | -1.48e-03 | -0.020600 | 0.017700 | 25.3 | 8.79e-01 | 9.14e-01 |
| ## PC(0-36:4)         | -1.04e-03 | -0.017900 | 0.015900 | 22.9 | 9.04e-01 | 9.30e-01 |
| ## PC(33:1)           | 9.94e-04  | -0.021700 | 0.023700 | 20.9 | 9.32e-01 | 9.46e-01 |
| ## SM(d18:2/24:1)     | 5.51e-04  | -0.013200 | 0.014300 | 24.0 | 9.37e-01 | 9.46e-01 |
| ## PC(35:1)           | -1.71e-05 | -0.019300 | 0.019300 | 21.8 | 9.99e-01 | 9.99e-01 |

### 1.2.2.2 Heatmaps

```
##   Label Relation p.adj
## 1    # p.adj < 0.01
## 2    x p.adj < 0.05
## 3    * p.adj < 0.10
```



# slope\_albuminuria\_profil

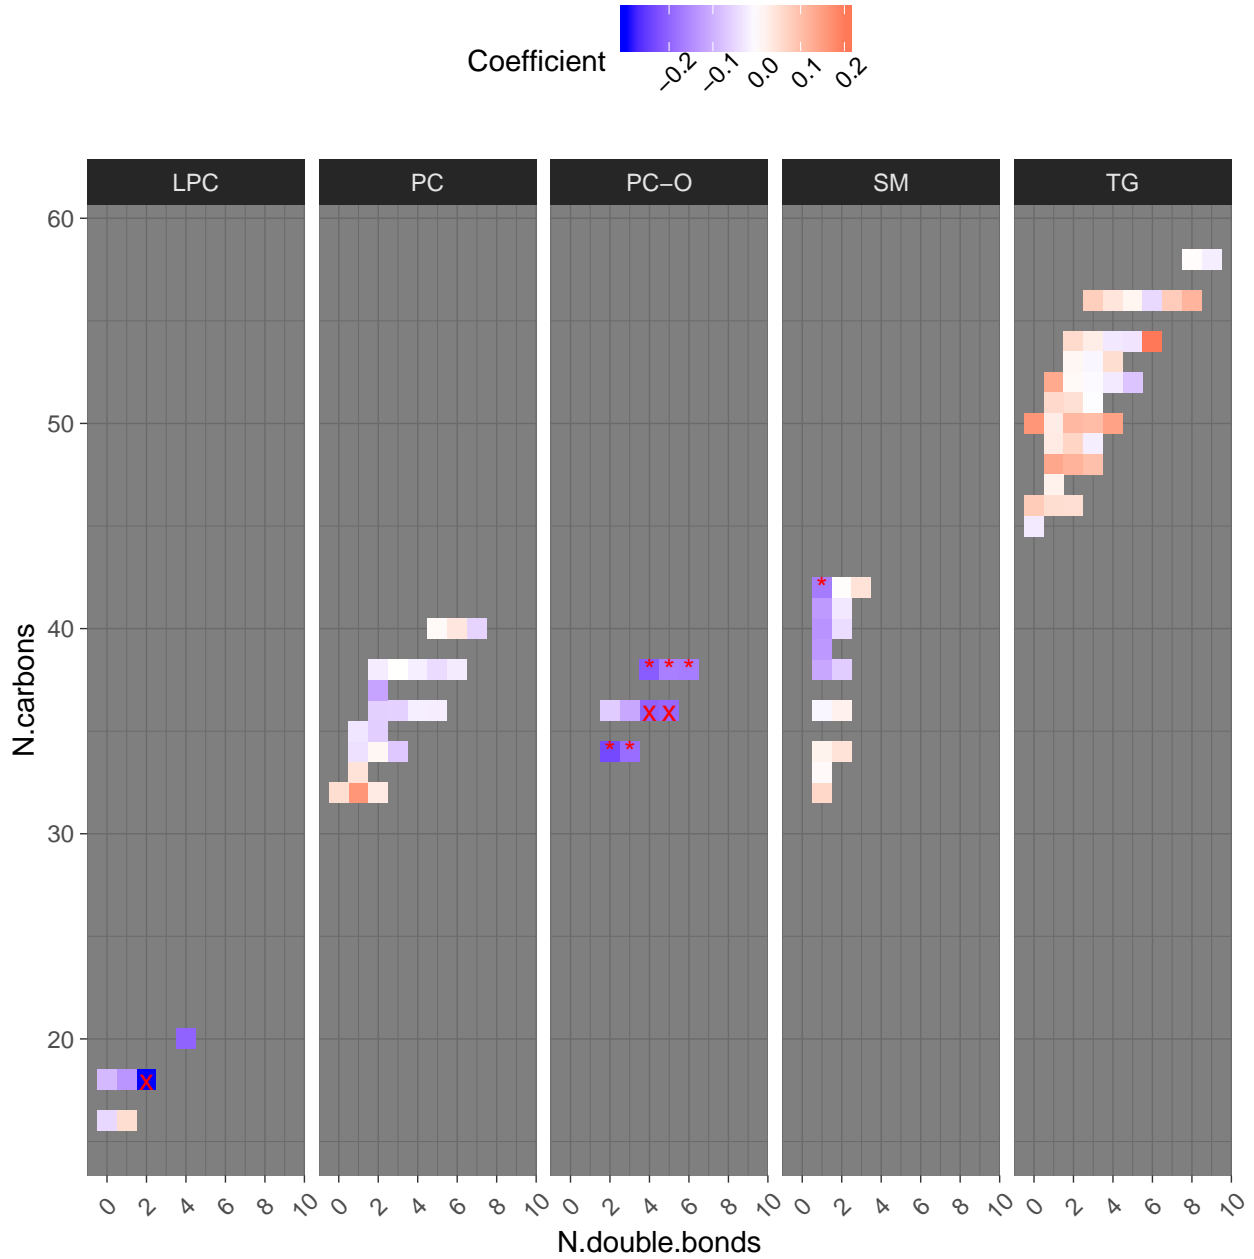

Figure 10: Heatmap of the lipid-specific model coefficients from the crude model for albuminuria (logUAER) slope. The name of the group is shown in the title of the figure in the top-left corner. Lipids are organized into panels (columns) by their class (from LPC to TG). One colored rectangle corresponds to one lipid species, where the coordinates in the x-axis and y-axis, respectively, show the number of double bonds (N.double.bonds) and the number of carbon atoms (N.carbons) in the fatty acid chains of the lipid. The number of double bonds corresponds to the number of unsaturated bonds in the fatty acid chains, and the number of carbon atoms corresponds to the length of the fatty acid chains and, thus, the size of the lipid. The magnitude of the lipid-specific model coefficient is shown as the color of the rectangle (blue: negative; red: positive). Coefficient with statistical significance are annotated with symbols #, x and \*, respectively, corresponding to  $p < 0.01$ ,  $p < 0.05$  and  $p < 0.1$ .

### 1.3 Combined Heatmaps from Crude Models for Slopes

```
## Label Relation p.adj
## 1 # p.adj < 0.01
## 2 x p.adj < 0.05
## 3 * p.adj < 0.10
```

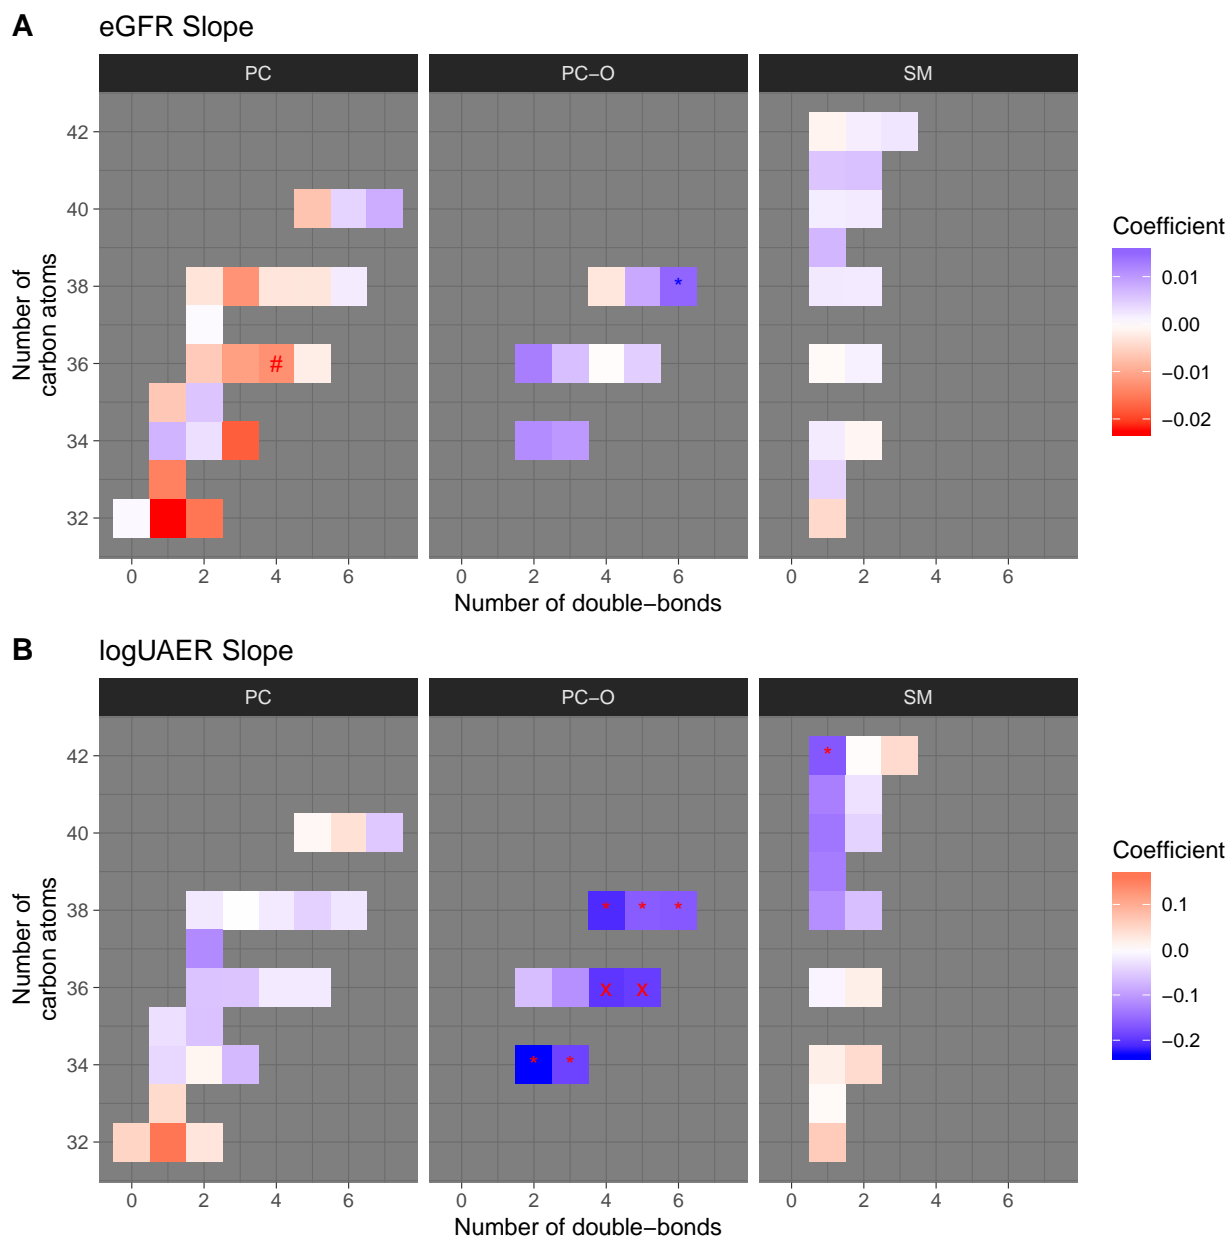

Figure 11: Heatmap of the lipid-specific model coefficients from the crude models for eGFR slope (A) and albuminuria (logUAER) slope (B). The name of the group is shown in the title of the figure in the top-left corner. Lipids are organized into panels (columns) by their class (from PC to SM). One colored rectangle corresponds to one lipid species, where the coordinates in the x-axis and y-axis, respectively, show the number of double bonds (N.double.bonds) and the number of carbon atoms (N.carbons) in the fatty acid chains of the lipid. The number of double bonds corresponds to the number of unsaturated bonds in the fatty acid chains, and the number of carbon atoms corresponds to the length of the fatty acid chains and, thus, the size of the lipid. The magnitude of the lipid-specific model coefficient is shown as the color of the rectangle (blue: negative; red: positive). Coefficient with statistical significance are annotated with symbols #, x and \*, respectively, corresponding to  $p < 0.01$ ,  $p < 0.05$  and  $p < 0.1$ .

## **2 Step 2: Adjusted Associations to Clinical Changes Over Time with Prioritized Lipids from Steps 1A-B**

### **2.1 Step 2A: Adjusted Model for Prioritized Lipids from the Adjusted Cross-Sectional Models**

#### **2.1.1 Albuminuria Slope**

### 2.1.1.1 Table

```

##
##
## Table: Results of the adjusted model for the continuous albuminuria (logUAER) slope
## and with lipids prioritized from the cross-sectional models.
## Shown in the table are name of the lipid (Name),
## model coefficient (Coefficient),
## its lower and upper confidence intervals (CI.L, CL.R),
## average value of the variable (AveExpr),
## p-value of the coefficient (P.Value) and
## the p-value after correction for multiple testing (adj.P.Val).
## The rows of the table are shown in an increasing order by the respective p-value.
##
## Name                Coefficient    CI.L    CI.R    AveExpr    P.Value    adj.P.Val
## -----
## SM(d38:1)           -0.195    -0.281  -0.1090    23.1    1.11e-05    6.67e-05
## SM(d40:1)           -0.187    -0.272  -0.1010    24.0    2.36e-05    7.07e-05
## SM(d18:1/24:0)     -0.193    -0.286  -0.0992    23.6    5.93e-05    1.19e-04
## SM(d41:1)           -0.196    -0.307  -0.0837    22.7    6.41e-04    9.62e-04
## PC(0-34:3)         -0.161    -0.283  -0.0389    21.9    9.87e-03    1.18e-02
## TG(18:0/18:1/20:4) -0.314    -0.563  -0.0656    21.3    1.33e-02    1.33e-02

```

2.1.1.2 Heatmaps

slope\_albuminuria\_profil

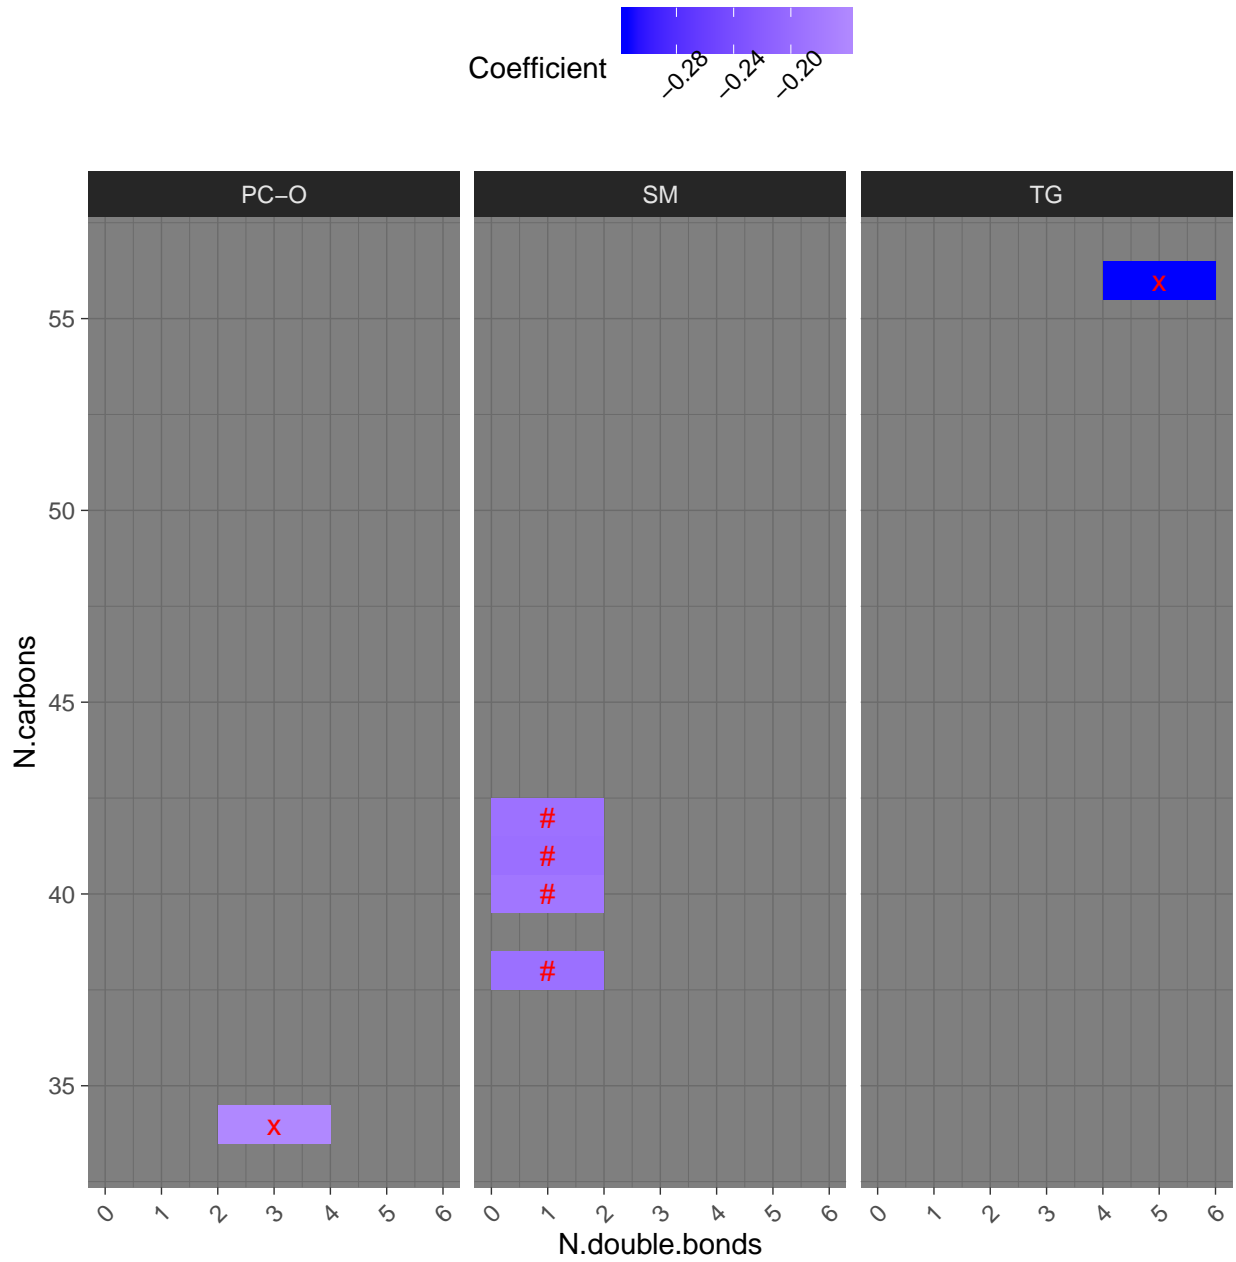

```
## Label Relation p.adj
## 1 # p.adj < 0.01
## 2 x p.adj < 0.05
## 3 * p.adj < 0.10
```

## 2.1.2 eGFR Slope

### 2.1.2.1 Table

```
##
##
## Table: Results of the adjusted model for the eGFR slope
## with lipids prioritized from the cross-sectional models.
## Shown in the table are name of the lipid (Name),
## model coefficient (Coefficient),
## its lower and upper confidence intervals (CI.L, CL.R),
## average value of the variable (AveExpr),
## p-value of the coefficient (P.Value) and
## the p-value after correction for multiple testing (adj.P.Val).
## The rows of the table are shown in an increasing order by the respective p-value.
##
```

| ## Name               | Coefficient | CI.L     | CI.R     | AveExpr | P.Value | adj.P.Val |
|-----------------------|-------------|----------|----------|---------|---------|-----------|
| ## PC(32:2)           | -0.016700   | -0.03410 | 0.000693 | 20.7    | 0.0598  | 0.860     |
| ## LPC(16:0)          | -0.004370   | -0.00929 | 0.000556 | 25.3    | 0.0819  | 0.860     |
| ## TG(14:0/16:0/18:1) | -0.012700   | -0.03000 | 0.004700 | 22.8    | 0.1530  | 0.984     |
| ## PC(32:1)           | -0.012700   | -0.03220 | 0.006850 | 23.3    | 0.2030  | 0.984     |
| ## LPC(16:1)          | -0.008500   | -0.02380 | 0.006850 | 20.0    | 0.2770  | 0.984     |
| ## SM(d34:1)          | 0.002180    | -0.00218 | 0.006540 | 24.9    | 0.3260  | 0.984     |
| ## SM(d33:1)          | 0.004260    | -0.00526 | 0.013800 | 21.3    | 0.3800  | 0.984     |
| ## PC(40:6)           | 0.004770    | -0.00845 | 0.018000 | 24.0    | 0.4790  | 0.984     |
| ## PC(0-36:2)         | 0.003420    | -0.00813 | 0.015000 | 20.5    | 0.5610  | 0.984     |
| ## TG(18:2/18:2/18:2) | -0.006130   | -0.02720 | 0.014900 | 22.1    | 0.5680  | 0.984     |
| ## PC(38:6)           | 0.001860    | -0.00682 | 0.010500 | 25.4    | 0.6730  | 0.984     |
| ## PC(0-38:4)         | -0.002850   | -0.01650 | 0.010800 | 21.7    | 0.6810  | 0.984     |
| ## TG(16:0/18:2/22:6) | 0.005660    | -0.03300 | 0.044300 | 21.0    | 0.7730  | 0.984     |
| ## PC(40:7)           | 0.001840    | -0.01130 | 0.015000 | 21.4    | 0.7840  | 0.984     |
| ## SM(d16:1/18:1)     | -0.000797   | -0.00778 | 0.006190 | 22.8    | 0.8230  | 0.984     |
| ## SM(d32:1)          | -0.000827   | -0.00982 | 0.008160 | 22.3    | 0.8570  | 0.984     |
| ## TG(18:1/18:1/22:6) | -0.002700   | -0.03710 | 0.031700 | 20.7    | 0.8780  | 0.984     |
| ## SM(d18:2/24:1)     | 0.000381    | -0.00745 | 0.008220 | 24.0    | 0.9240  | 0.984     |
| ## TG(58:9)           | 0.000924    | -0.03490 | 0.036800 | 19.9    | 0.9600  | 0.984     |
| ## TG(18:2/22:5/16:0) | 0.000334    | -0.02860 | 0.029300 | 22.1    | 0.9820  | 0.984     |
| ## PC(36:5)           | 0.000226    | -0.02140 | 0.021900 | 24.4    | 0.9840  | 0.984     |



### 2.1.2.2 Heatmaps

```
## Label Relation p.adj
## 1 # p.adj < 0.01
## 2 x p.adj < 0.05
## 3 * p.adj < 0.10
```

slope\_gfr\_profil

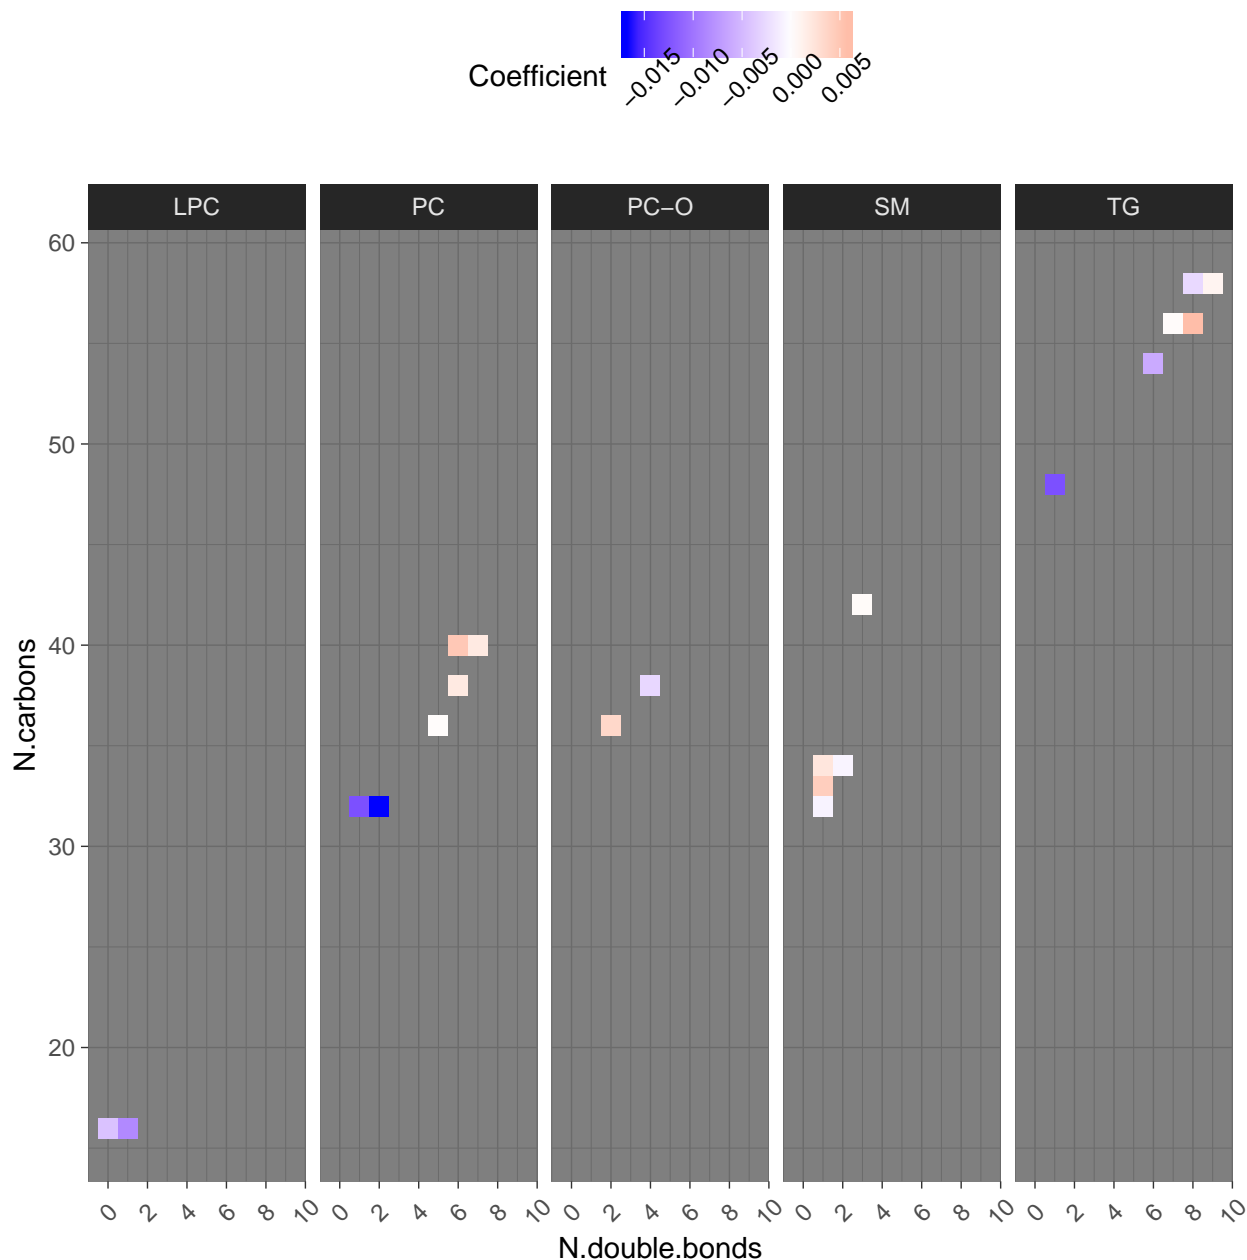

Figure 12: Heatmap of the lipid-specific model coefficients from the adjusted model for eGFR slope with lipids prioritized from the cross-sectional models. Lipids are organized into panels (columns) by their class (from LPC to TG). One colored rectangle corresponds to one lipid species, where the coordinates in the x-axis and y-axis, respectively, show the number of double bonds (N.double.bonds) and the number of carbon atoms (N.carbons) in the fatty acid chains of the lipid. The number of double bonds corresponds to the number of unsaturated bonds in the fatty acid chains, and the number of carbon atoms corresponds to the length of the fatty acid chains and, thus, the size of the lipid. The magnitude of the lipid-specific model coefficient is shown as the color of the rectangle (blue: negative; red: positive). Coefficient with statistical significance are annotated with symbols #, x and \*, respectively, corresponding to  $p < 0.01$ ,  $p < 0.05$  and  $p < 0.1$ .

## 2.2 Step 2B: Adjusted Model for Prioritized Lipids from the Crude Models for Slopes

### 2.2.1 eGFR Slope

### 2.2.1.1 Table

```

##
##
## Table: Results of the adjusted model for eGFR slope
## with the lipids prioritized from the crude slope models.
## Shown in the table are name of the lipid (Name),
## model coefficient (Coefficient),
## its lower and upper confidence intervals (CI.L, CL.R),
## average value of the variable (AveExpr),
## p-value of the coefficient (P.Value) and
## the p-value after correction for multiple testing (adj.P.Val).
## The rows of the table are shown in an increasing order by the respective p-value.
##
## Name                Coefficient      CI.L      CI.R      AveExpr      P.Value      adj.P.Val
## -----
## PC(36:4)            -0.01400      -0.02060  -0.007370   26.0      3.79e-05     0.000455
## LPC(16:0)           -0.00437      -0.00931   0.000576   25.3      8.32e-02     0.305000
## PC(0-38:6)          0.00823       -0.00177   0.018200   20.4      1.06e-01     0.305000
## TG(51:3)            -0.01250      -0.02780   0.002810   20.7      1.09e-01     0.305000
## TG(46:0)            -0.01470      -0.03360   0.004220   20.4      1.28e-01     0.305000
## TG(14:0/16:0/18:1) -0.01270      -0.03000   0.004690   22.8      1.52e-01     0.305000
## TG(51:2)            -0.00629      -0.01980   0.007190   21.5      3.60e-01     0.617000
## TG(50:0)            -0.00680      -0.02940   0.015800   20.8      5.54e-01     0.691000
## TG(18:2/18:2/18:2) -0.00613      -0.02720   0.014900   22.1      5.68e-01     0.691000
## TG(51:1)            -0.00463      -0.02090   0.011600   20.3      5.76e-01     0.691000
## TG(50:2)            -0.00140      -0.01110   0.008270   21.1      7.76e-01     0.830000
## TG(14:0/18:1/18:1) -0.00122      -0.01240   0.009910   24.4      8.30e-01     0.830000

```

### 2.2.1.2 Heatmaps

```
## Label Relation p.adj
## 1 # p.adj < 0.01
## 2 x p.adj < 0.05
## 3 * p.adj < 0.10
```

# slope\_gfr\_profil

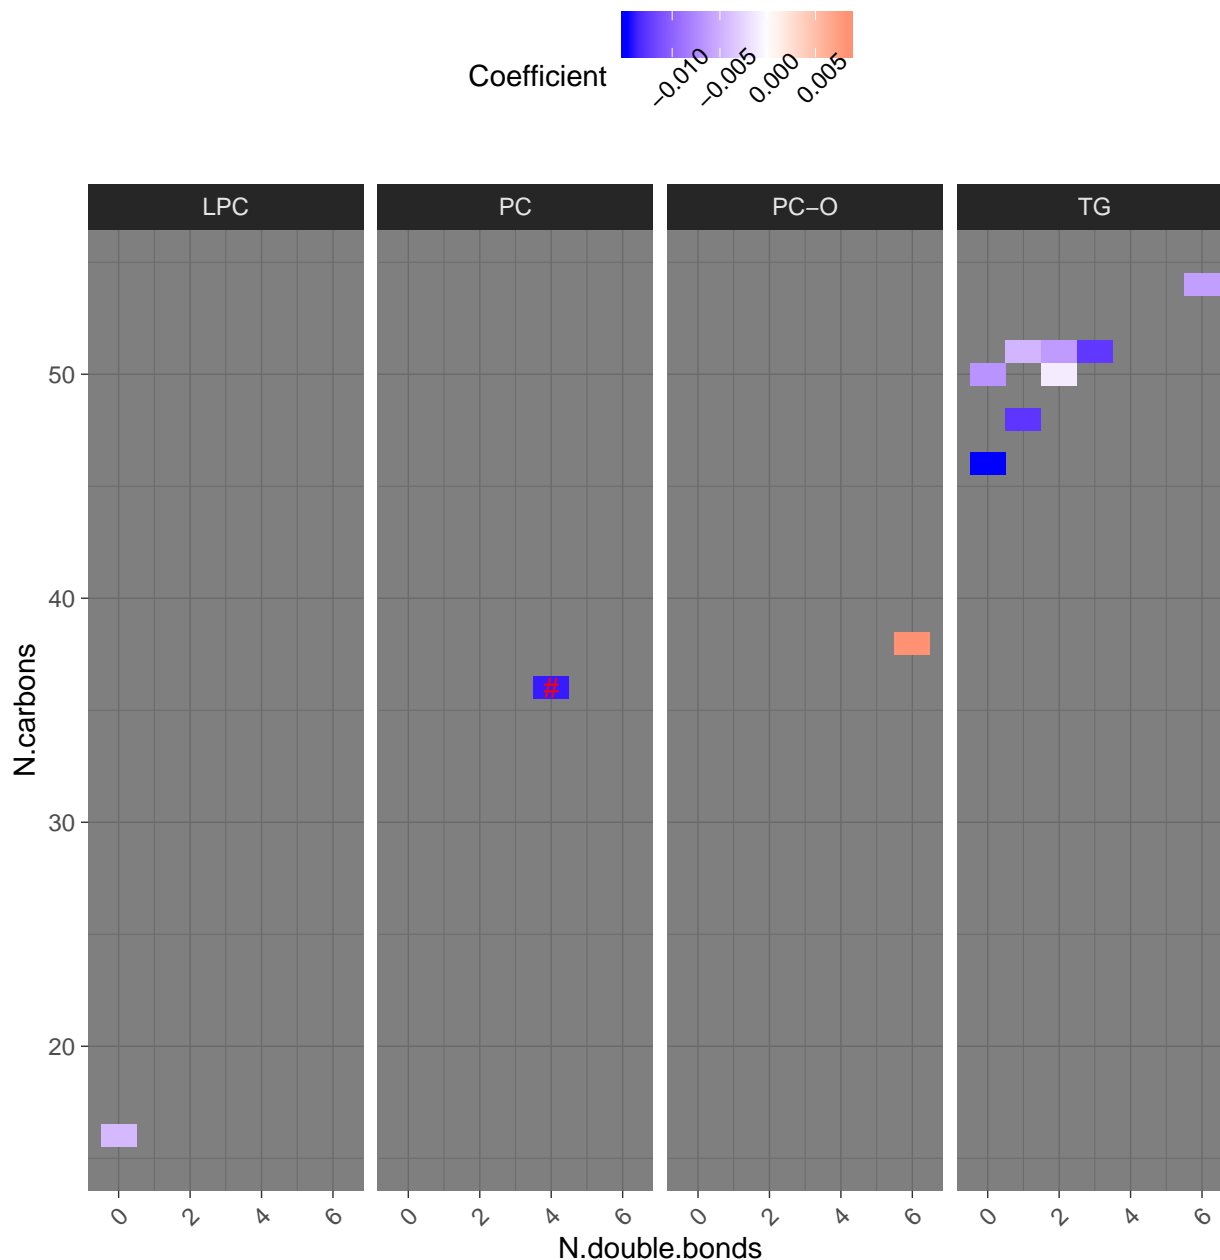

Figure 13: Heatmap of the lipid-specific model coefficients from the adjusted model for eGFR slope with lipids prioritized from the crude slope models. Lipids are organized into panels (columns) by their class (from LPC to TG). One colored rectangle corresponds to one lipid species, where the coordinates in the x-axis and y-axis, respectively, show the number of double bonds (N.double.bonds) and the number of carbon atoms (N.carbons) in the fatty acid chains of the lipid. The number of double bonds corresponds to the number of unsaturated bonds in the fatty acid chains, and the number of carbon atoms corresponds to the length of the fatty acid chains and, thus, the size of the lipid. The magnitude of the lipid-specific model coefficient is shown as the color of the rectangle (blue: negative; red: positive). Coefficient with statistical significance are annotated with symbols #, x and \*, respectively, corresponding to  $p < 0.01$ ,  $p < 0.05$  and  $p < 0.1$ .

## 2.2.2 Albuminuria Slope

### 2.2.2.1 Table

```

##
##
## Table: Results of the adjusted model for the continuous albuminuria (logUAER) slope
## with the lipids prioritized from the crude slope models.
## Shown in the table are name of the lipid (Name),
## model coefficient (Coefficient),
## its lower and upper confidence intervals (CI.L, CL.R),
## average value of the variable (AveExpr),
## p-value of the coefficient (P.Value) and
## the p-value after correction for multiple testing (adj.P.Val).
## The rows of the table are shown in an increasing order by the respective p-value.
##
## Name          Coefficient    CI.L    CI.R    AveExpr    P.Value    adj.P.Val
## -----
## PC(0-38:6)    -0.229    -0.335  -0.1220    20.4    2.94e-05    0.000203
## PC(0-36:5)    -0.243    -0.359  -0.1270    22.3    4.66e-05    0.000203
## SM(d18:1/24:0) -0.193    -0.287  -0.0984    23.6    6.75e-05    0.000203
## PC(0-36:4)    -0.225    -0.351  -0.0987    22.9    5.08e-04    0.001140
## PC(0-38:4)    -0.249    -0.394  -0.1050    21.7    7.28e-04    0.001310
## PC(0-38:5)    -0.173    -0.282  -0.0645    22.8    1.85e-03    0.002770
## PC(0-34:3)    -0.161    -0.284  -0.0388    21.9    9.94e-03    0.012800
## PC(0-34:2)    -0.188    -0.356  -0.0205    21.5    2.80e-02    0.031500
## LPC(18:2)     -0.134    -0.307   0.0387    24.0    1.28e-01    0.128000

```



### 2.2.2.2 Heatmaps

```
## Label Relation p.adj
## 1    # p.adj < 0.01
## 2    x p.adj < 0.05
## 3    * p.adj < 0.10
```

# slope\_albuminuria\_profil

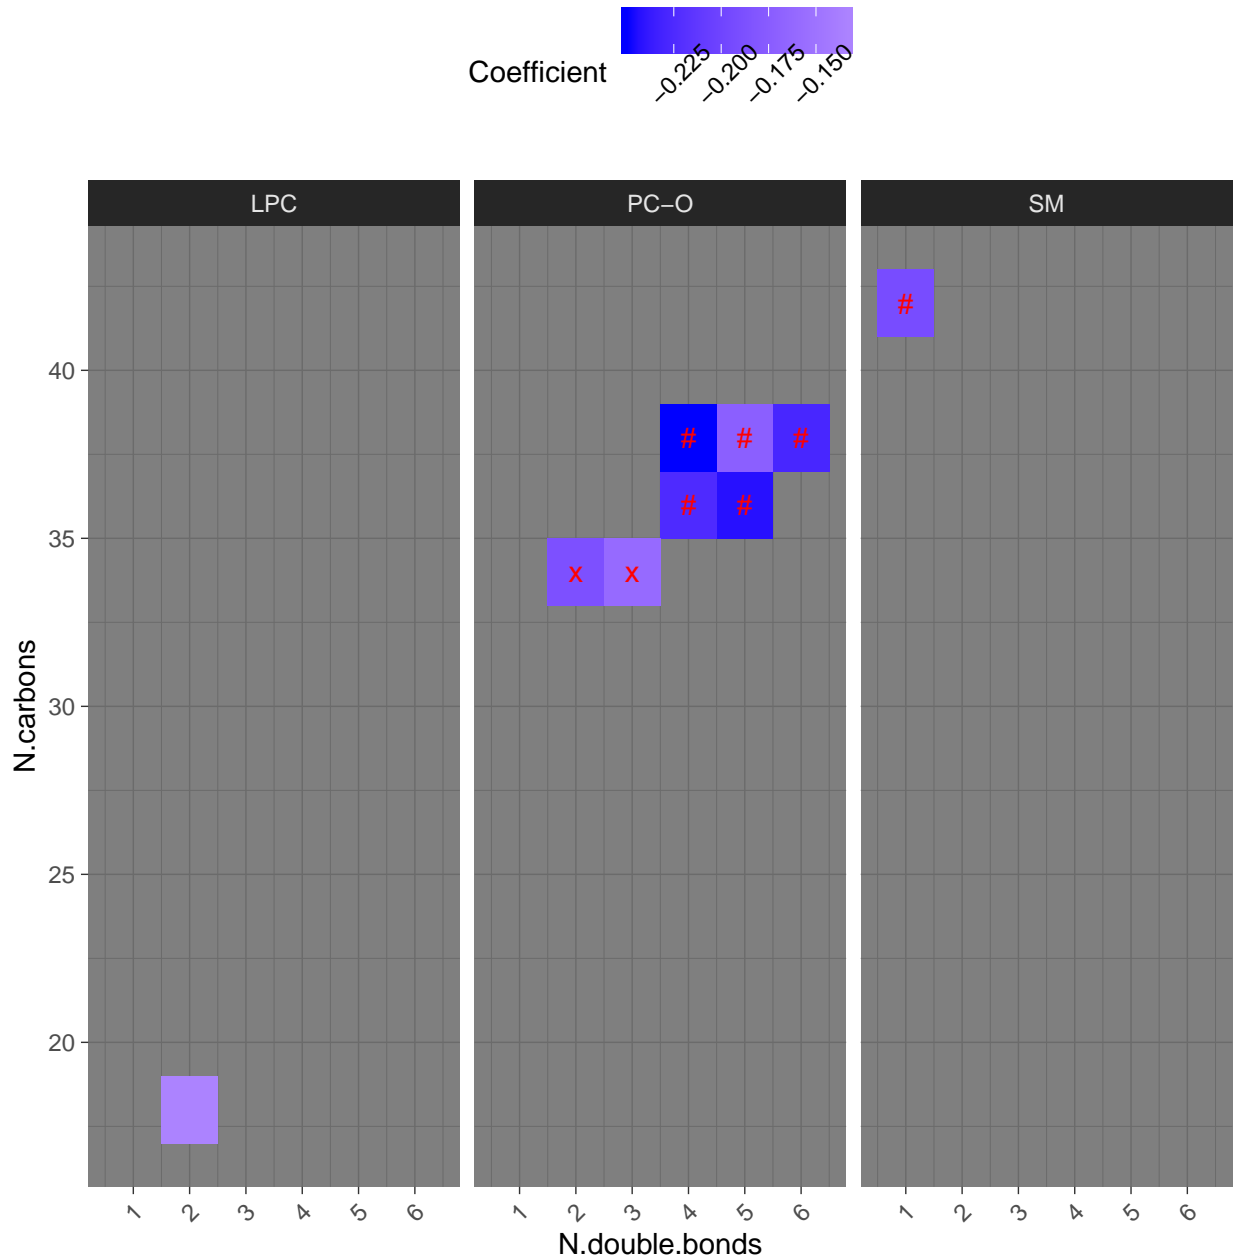

Figure 14: Heatmap of the lipid-specific model coefficients from the adjusted model for albuminuria (logUAER) slope with lipids prioritized from the crude slope models. Lipids are organized into panels (columns) by their class (from LPC to TG). One colored rectangle corresponds to one lipid species, where the coordinates in the x-axis and y-axis, respectively, show the number of double bonds (N.double.bonds) and the number of carbon atoms (N.carbons) in the fatty acid chains of the lipid. The number of double bonds corresponds to the number of unsaturated bonds in the fatty acid chains, and the number of carbon atoms corresponds to the length of the fatty acid chains and, thus, the size of the lipid. The magnitude of the lipid-specific model coefficient is shown as the color of the rectangle (blue: negative; red: positive). Coefficient with statistical significance are annotated with symbols #, x and \*, respectively, corresponding to  $p < 0.01$ ,  $p < 0.05$  and  $p < 0.1$ .

### **3 Step 3: Survival Analysis of Combined Renal Endpoint in Relation to Prioritized Lipids from Step 2A-B**

#### **3.1 Step 3A: Crude Model**

```
## Warning in lapply(X = x, FUN = .Generic, ...): NaNs produced
```

### 3.1.1 Table

Table 1: Crude survival model for the combined renal endpoint. Shown in the table are the name of the lipid (Name), the hazard ratio ( $\exp(\text{coef})$ ) and its lower and upper confidence intervals (lower .95 and upper .95, respectively), p-value of the coefficient ( $\Pr(>|z|)$ ), and the p-value after correction for multiple testing (p.adj).

| Name               | $\exp(\text{coef})$ | lower .95 | upper .95 | $\Pr(> z )$ | p.adj    |
|--------------------|---------------------|-----------|-----------|-------------|----------|
| PC(O-34:3)         | 0.404               | 0.289     | 0.566     | 1.00e-07    | 1.60e-06 |
| PC(O-34:2)         | 0.583               | 0.441     | 0.770     | 1.47e-04    | 1.76e-03 |
| SM(d41:1)          | 0.533               | 0.383     | 0.742     | 1.91e-04    | 2.10e-03 |
| SM(d40:1)          | 0.472               | 0.308     | 0.724     | 5.79e-04    | 5.79e-03 |
| SM(d18:1/24:0)     | 0.525               | 0.347     | 0.795     | 2.31e-03    | 2.08e-02 |
| TG(18:0/18:1/20:4) | 1.250               | 1.030     | 1.530     | 2.41e-02    | 1.93e-01 |
| SM(d38:1)          | 0.615               | 0.384     | 0.983     | 4.22e-02    | 2.95e-01 |
| PC(O-38:4)         | 0.738               | 0.526     | 1.040     | 7.83e-02    | 4.70e-01 |
| PC(O-36:5)         | 0.704               | 0.466     | 1.060     | 9.53e-02    | 4.76e-01 |
| PC(O-38:6)         | 0.737               | 0.483     | 1.120     | 1.57e-01    | 6.29e-01 |
| PC(O-36:4)         | 0.791               | 0.535     | 1.170     | 2.40e-01    | 7.19e-01 |
| PC(36:4)           | 1.620               | 0.709     | 3.700     | 2.52e-01    | 7.19e-01 |
| PC(O-38:5)         | 0.866               | 0.548     | 1.370     | 5.37e-01    | 7.19e-01 |

### 3.1.2 Heatmaps

```
## Label Relation p.adj
## 1    # p.adj < 0.01
## 2    x p.adj < 0.05
## 3    * p.adj < 0.10
```

## Combined Renal Endpoint

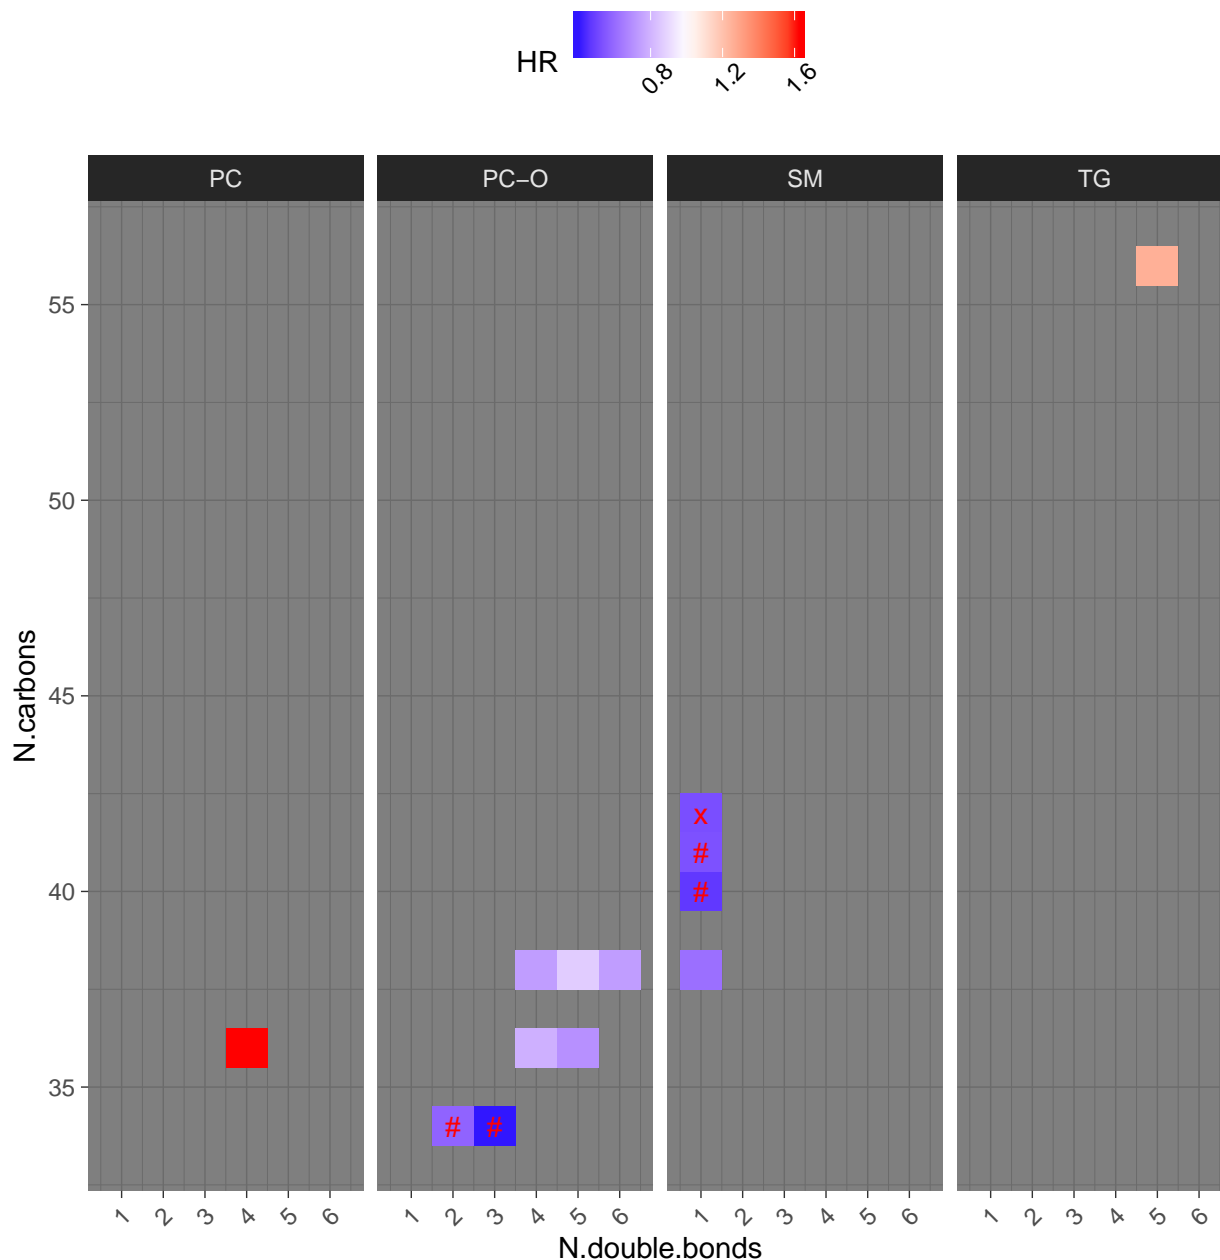

Figure 15: Heatmap of the lipid-specific hazard ratios (HRs) from the crude survival model for the combined renal endpoint. Lipids are organized into panels (columns) by their class (from PC to TG). One colored rectangle corresponds to one lipid species, where the coordinates in the x-axis and y-axis, respectively, show the number of double bonds (N.double.bonds) and the number of carbon atoms (N.carbons) in the fatty acid chains of the lipid. The number of double bonds corresponds to the number of unsaturated bonds in the fatty acid chains, and the number of carbon atoms corresponds to the length of the fatty acid chains and, thus, the size of the lipid. The magnitude of the lipid-specific hazard ratio is shown as the color of the rectangle (blue: inverse association; red: positive association). Associations with statistical significance are annotated with symbols #, x and \*, respectively, corresponding to  $p < 0.01$ ,  $p < 0.05$  and  $p < 0.1$ .

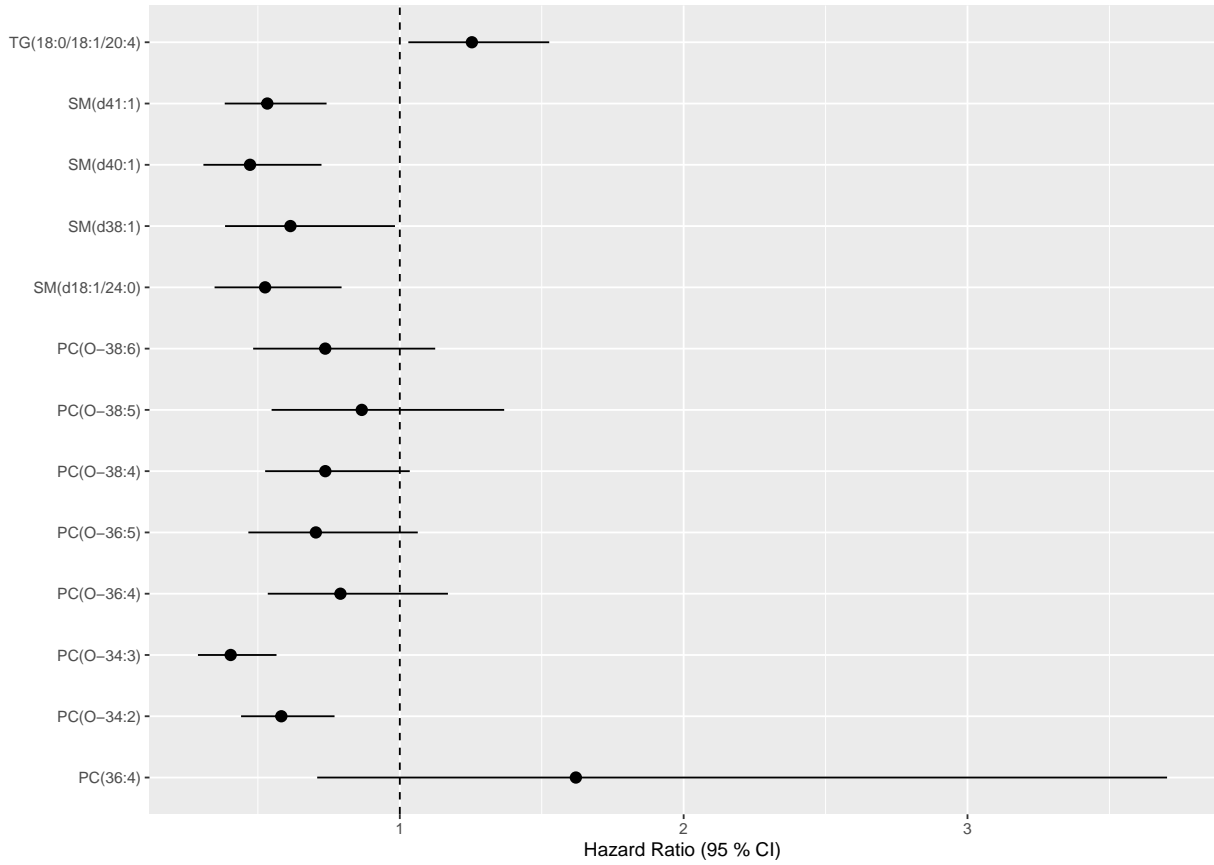

Figure 16: Forest plot of hazard ratios from the crude survival model for the combined renal event.

### 3.1.3 Forest Plot

## 3.2 Step 3B: Adjusted Model

```
## Warning in lapply(X = x, FUN = .Generic, ...): NaNs produced
```



### 3.2.1 Table

Table 2: Adjusted survival model for the combined renal endpoint. Shown in the table are the name of the lipid (Name), the hazard ratio ( $\exp(\text{coef})$ ) and its lower and upper confidence intervals (lower .95 and upper .95, respectively), p-value of the coefficient ( $\Pr(>|z|)$ ), and the p-value after correction for multiple testing (p.adj).

| Name               | $\exp(\text{coef})$ | lower .95 | upper .95 | $\Pr(> z )$ | p.adj  |
|--------------------|---------------------|-----------|-----------|-------------|--------|
| SM(d38:1)          | 0.399               | 0.225     | 0.709     | 0.00173     | 0.0225 |
| SM(d41:1)          | 0.490               | 0.303     | 0.791     | 0.00348     | 0.0418 |
| SM(d40:1)          | 0.433               | 0.242     | 0.774     | 0.00477     | 0.0525 |
| PC(O-34:3)         | 0.561               | 0.355     | 0.886     | 0.01310     | 0.1310 |
| PC(O-38:4)         | 0.618               | 0.418     | 0.915     | 0.01620     | 0.1460 |
| PC(O-34:2)         | 0.680               | 0.489     | 0.945     | 0.02170     | 0.1740 |
| PC(O-36:4)         | 0.703               | 0.448     | 1.100     | 0.12500     | 0.8720 |
| SM(d18:1/24:0)     | 0.682               | 0.395     | 1.180     | 0.17000     | 1.0000 |
| PC(O-38:5)         | 0.742               | 0.437     | 1.260     | 0.26700     | 1.0000 |
| TG(18:0/18:1/20:4) | 0.914               | 0.722     | 1.160     | 0.45300     | 1.0000 |
| PC(O-36:5)         | 0.835               | 0.513     | 1.360     | 0.47000     | 1.0000 |
| PC(O-38:6)         | 0.898               | 0.533     | 1.510     | 0.68600     | 1.0000 |
| PC(36:4)           | 1.120               | 0.545     | 2.300     | 0.75800     | 1.0000 |

### 3.2.2 Heatmaps

```
##   Label Relation p.adj
## 1    # p.adj < 0.01
## 2    x p.adj < 0.05
## 3    * p.adj < 0.10
```

## Combined Renal Endpoint

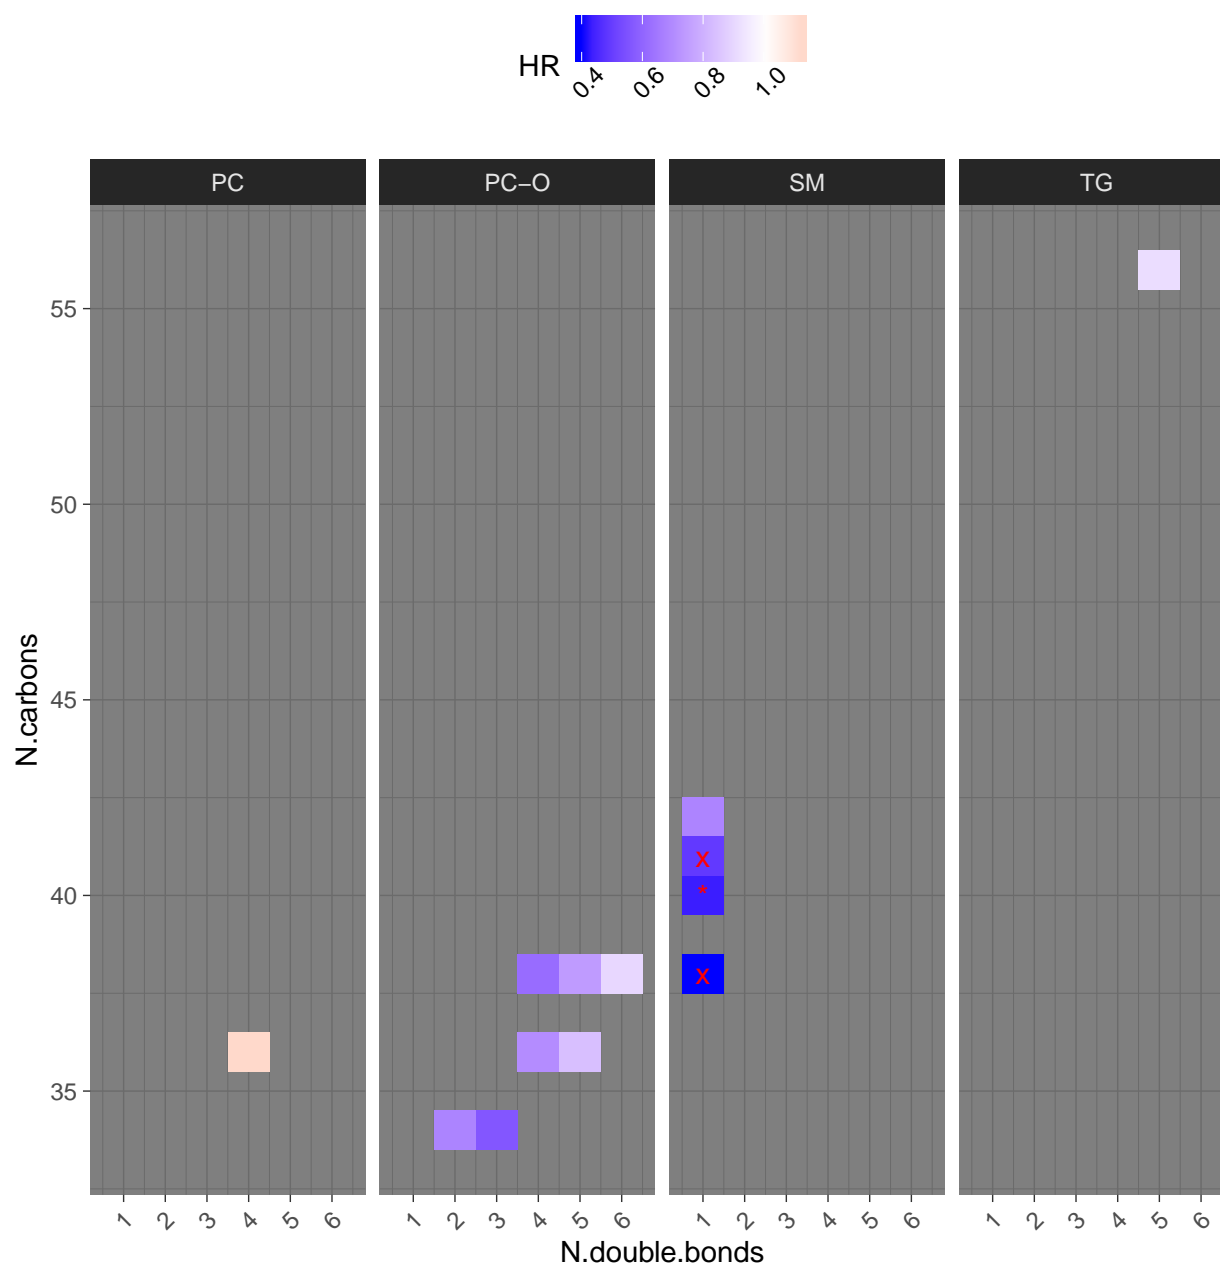

Figure 17: Heatmap of the lipid-specific hazard ratios (HRs) from the adjusted survival model for the combined renal endpoint. Lipids are organized into panels (columns) by their class (from PC to TG). One colored rectangle corresponds to one lipid species, where the coordinates in the x-axis and y-axis, respectively, show the number of double bonds (N.double.bonds) and the number of carbon atoms (N.carbons) in the fatty acid chains of the lipid. The number of double bonds corresponds to the number of unsaturated bonds in the fatty acid chains, and the number of carbon atoms corresponds to the length of the fatty acid chains and, thus, the size of the lipid. The magnitude of the lipid-specific hazard ratio is shown as the color of the rectangle (blue: inverse association; red: positive association). Associations with statistical significance are annotated with symbols #, x and \*, respectively, corresponding to  $p < 0.01$ ,  $p < 0.05$  and  $p < 0.1$ .

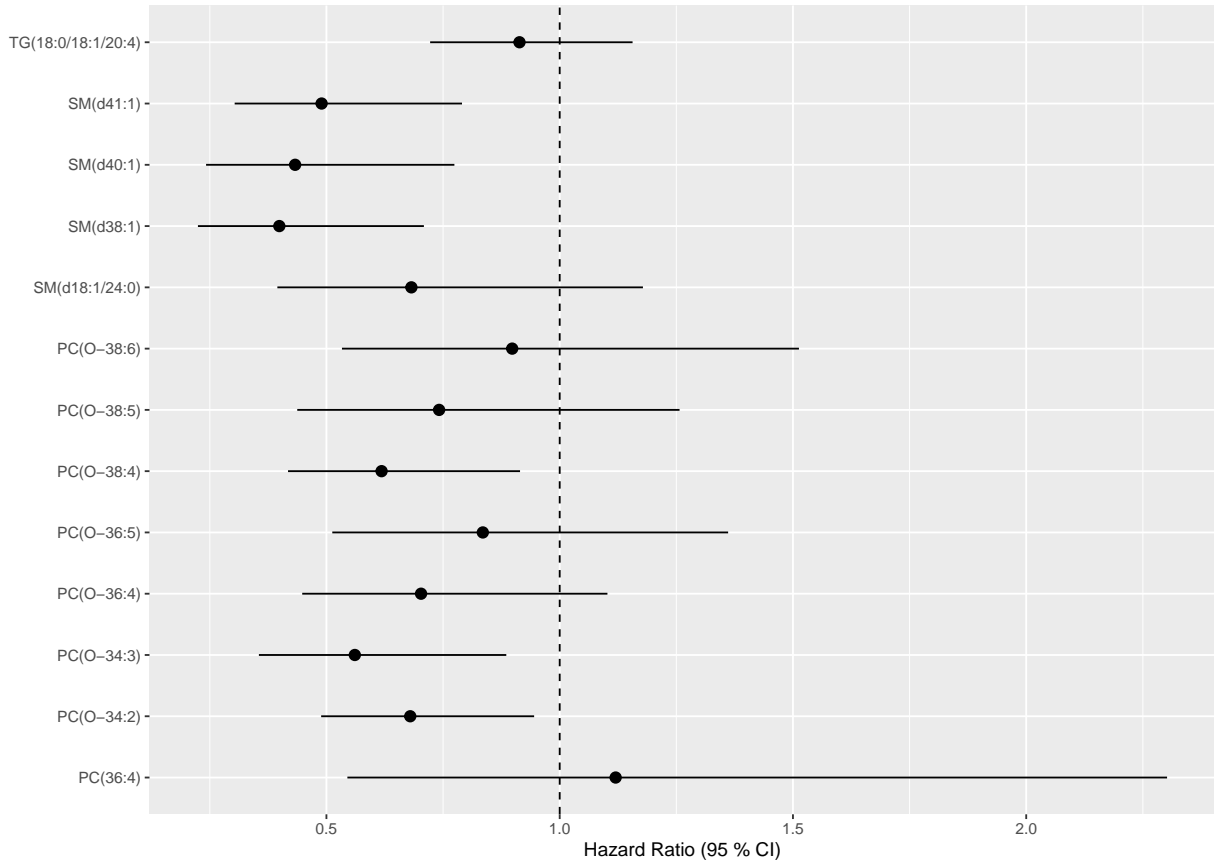

Figure 18: Forest plot of hazard ratios from the adjusted survival model for the combined renal event.

### 3.2.3 Forest Plot

### 3.3 Combined Forest Plot from Crude and Adjusted Models

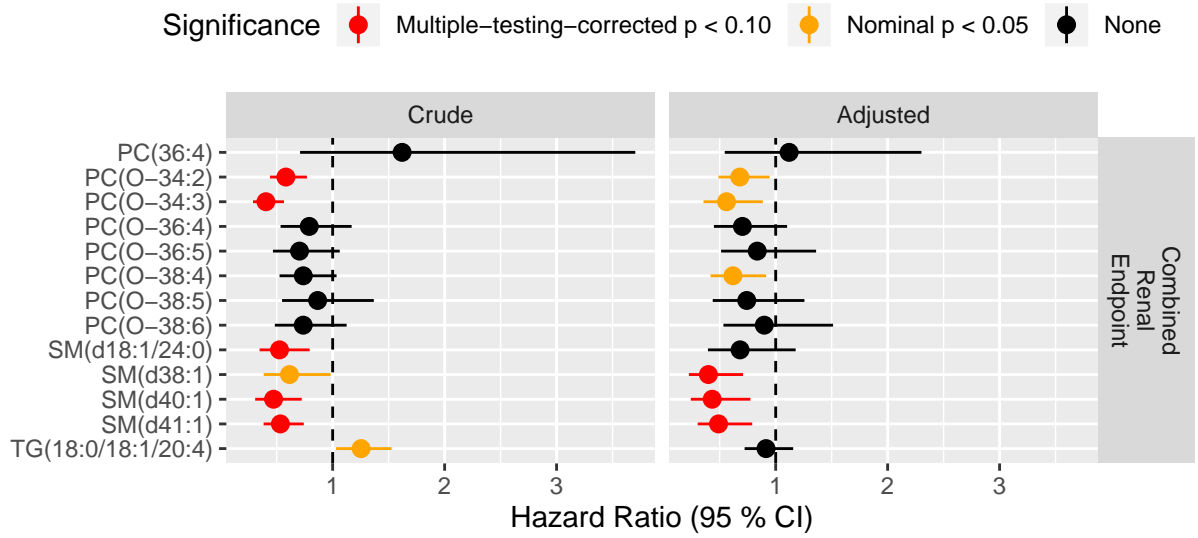

## **4 Step 4: Survival Analysis of Specific Renal Endpoints in Relation to Prioritized Lipids from Step 3A**

### **4.1 Step 4A: Albuminuria Group Progression**

#### **4.1.1 Crude Model**

#### 4.1.1.1 Table

Table 3: Crude survival model for albuminuria group progression. Shown in the table are the name of the lipid (Name), the hazard ratio ( $\exp(\text{coef})$ ) and its lower and upper confidence intervals (lower .95 and upper .95, respectively), p-value of the coefficient ( $\Pr(>|z|)$ ), and the p-value after correction for multiple testing (p.adj).

| Name           | exp(coef) | lower .95 | upper .95 | Pr(> z ) | p.adj |
|----------------|-----------|-----------|-----------|----------|-------|
| SM(d18:1/24:0) | 0.516     | 0.236     | 1.13      | 0.0981   | 0.491 |
| SM(d40:1)      | 0.601     | 0.267     | 1.35      | 0.2190   | 0.874 |
| SM(d41:1)      | 0.727     | 0.376     | 1.41      | 0.3440   | 1.000 |
| PC(O-34:2)     | 0.873     | 0.517     | 1.47      | 0.6100   | 1.000 |
| PC(O-34:3)     | 0.888     | 0.464     | 1.70      | 0.7200   | 1.000 |

#### 4.1.1.2 Heatmaps

```
##   Label Relation p.adj
## 1    # p.adj < 0.01
## 2    x p.adj < 0.05
## 3    * p.adj < 0.10
```



## Albuminuria Group Progression

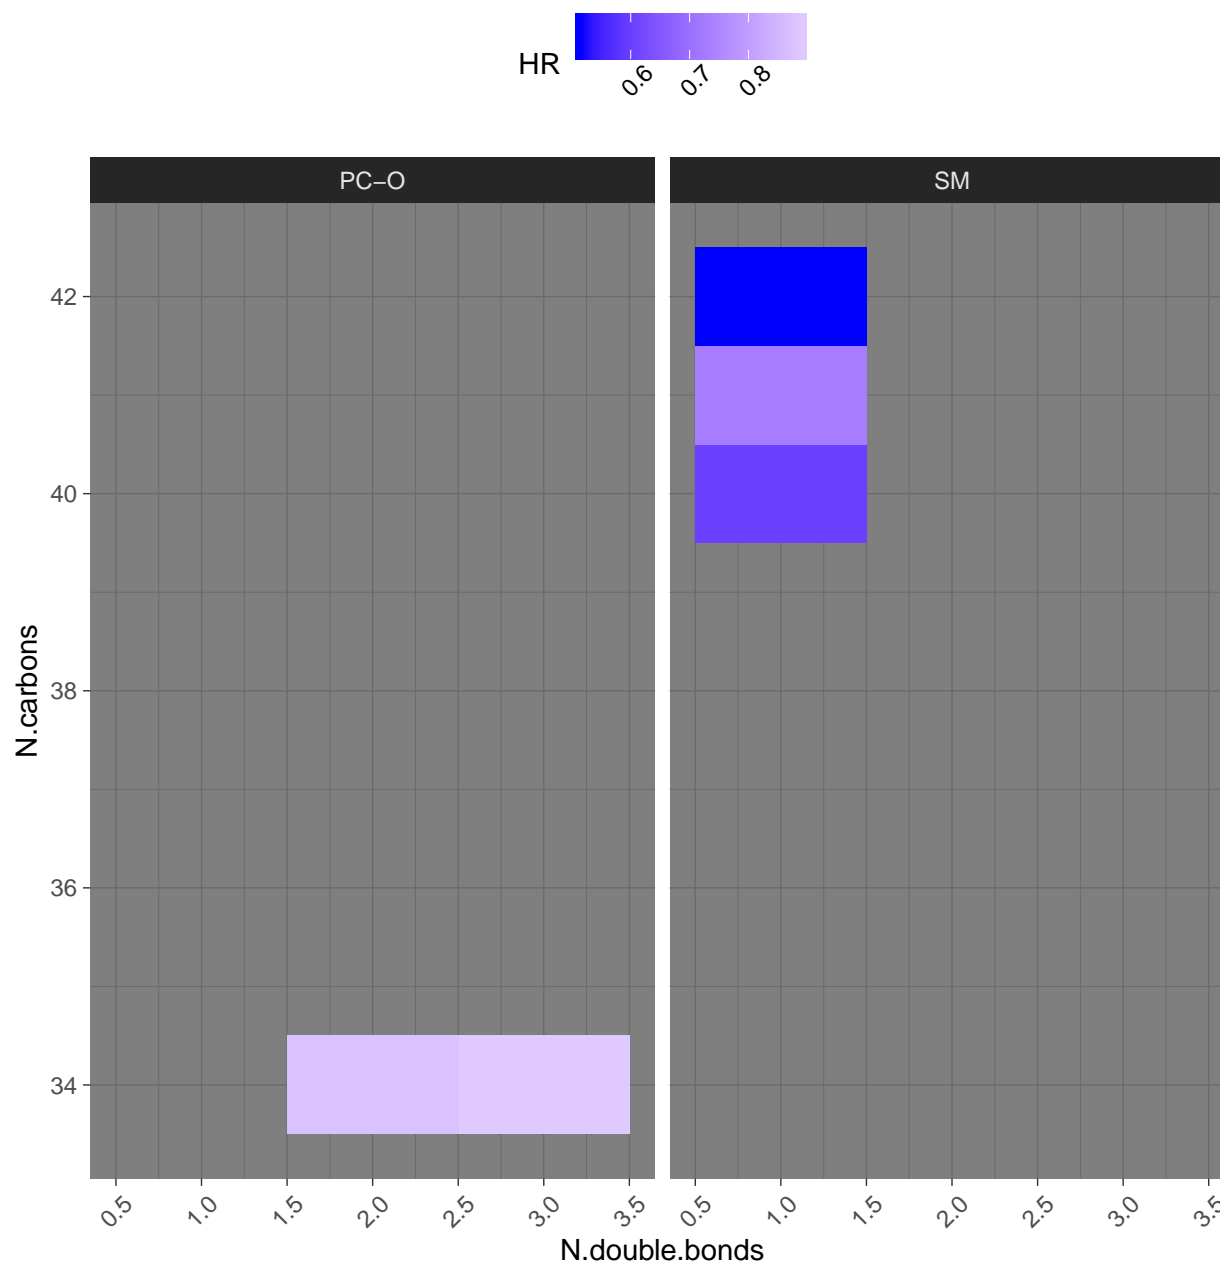

Figure 19: Heatmap of the lipid-specific hazard ratios (HRs) from the crude survival model for the albuminuria group progression. Lipids are organized into panels (columns) by their class (from PC-O to SM). One colored rectangle corresponds to one lipid species, where the coordinates in the x-axis and y-axis, respectively, show the number of double bonds (N.double.bonds) and the number of carbon atoms (N.carbons) in the fatty acid chains of the lipid. The number of double bonds corresponds to the number of unsaturated bonds in the fatty acid chains, and the number of carbon atoms corresponds to the length of the fatty acid chains and, thus, the size of the lipid. The magnitude of the lipid-specific hazard ratio is shown as the color of the rectangle (blue: inverse association; red: positive association). Associations with statistical significance are annotated with symbols #, x and \*, respectively, corresponding to  $p < 0.01$ ,  $p < 0.05$  and  $p < 0.1$ .

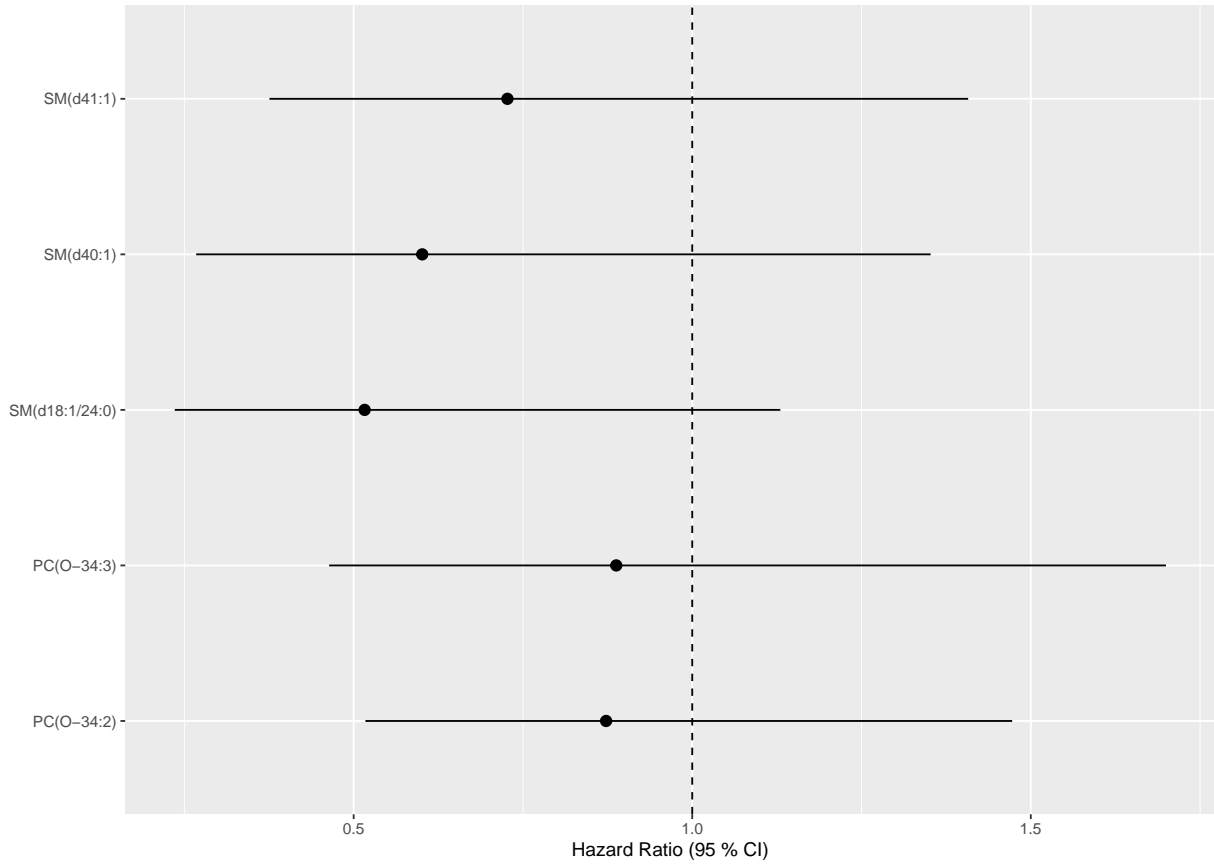

Figure 20: Forest plot of hazard ratios from the crude survival model for the albuminuria group progression. The hazard ratio and its 95 % confidence intervals (x-axis) are shown for each lipid (rows).

#### 4.1.1.3 Forest Plot

#### 4.1.2 Adjusted Model

#### 4.1.2.1 Table

Table 4: Adjusted survival model for albuminuria group progression. Shown in the table are the name of the lipid (Name), the hazard ratio ( $\exp(\text{coef})$ ) and its lower and upper confidence intervals (lower .95 and upper .95, respectively), p-value of the coefficient ( $\Pr(>|z|)$ ), and the p-value after correction for multiple testing (p.adj).

| Name           | exp(coef) | lower .95 | upper .95 | Pr(> z ) | p.adj  |
|----------------|-----------|-----------|-----------|----------|--------|
| SM(d18:1/24:0) | 0.270     | 0.0904    | 0.808     | 0.0191   | 0.0957 |
| SM(d40:1)      | 0.286     | 0.0884    | 0.924     | 0.0365   | 0.1460 |
| SM(d41:1)      | 0.480     | 0.1990    | 1.160     | 0.1040   | 0.3110 |
| PC(O-34:3)     | 0.740     | 0.2960    | 1.850     | 0.5200   | 1.0000 |
| PC(O-34:2)     | 0.854     | 0.4420    | 1.650     | 0.6400   | 1.0000 |

#### 4.1.2.2 Heatmaps

```
## Label Relation p.adj
## 1 # p.adj < 0.01
## 2 x p.adj < 0.05
## 3 * p.adj < 0.10
```

## Albuminuria Group Progression

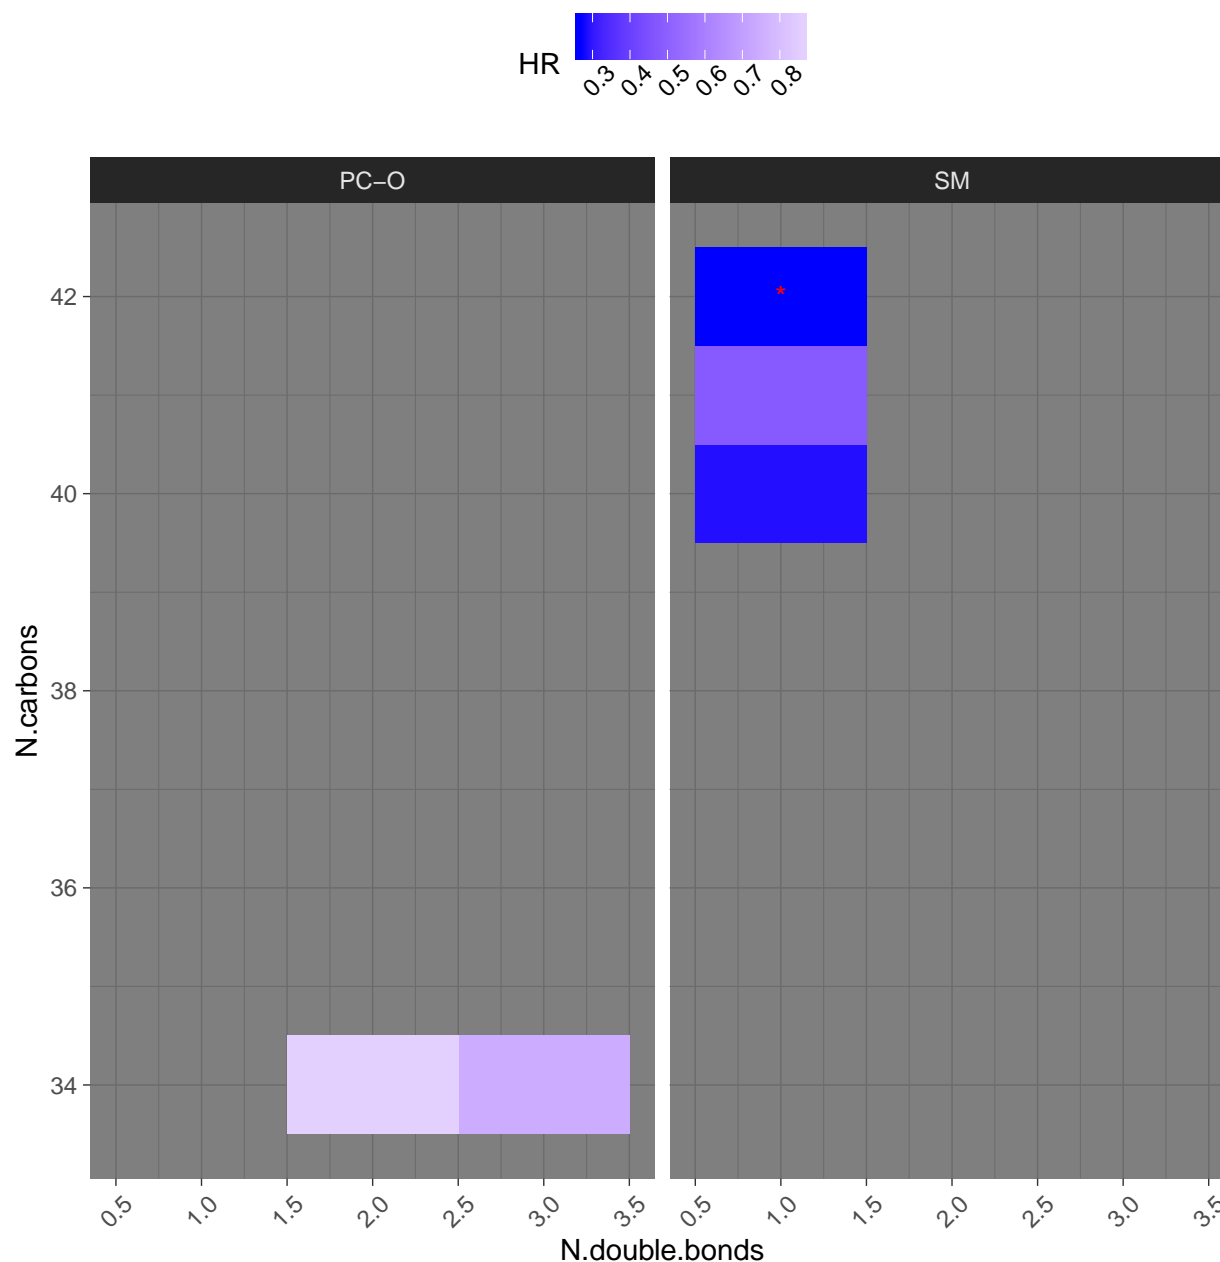

Figure 21: Heatmap of the lipid-specific hazard ratios (HRs) from the adjusted survival model for albuminuria group progression. Lipids are organized into panels (columns) by their class (from PC-O to SM). One colored rectangle corresponds to one lipid species, where the coordinates in the x-axis and y-axis, respectively, show the number of double bonds (N.double.bonds) and the number of carbon atoms (N.carbons) in the fatty acid chains of the lipid. The number of double bonds corresponds to the number of unsaturated bonds in the fatty acid chains, and the number of carbon atoms corresponds to the length of the fatty acid chains and, thus, the size of the lipid. The magnitude of the lipid-specific hazard ratio is shown as the color of the rectangle (blue: inverse association; red: positive association). Associations with statistical significance are annotated with symbols #, x and \*, respectively, corresponding to  $p < 0.01$ ,  $p < 0.05$  and  $p < 0.1$ .

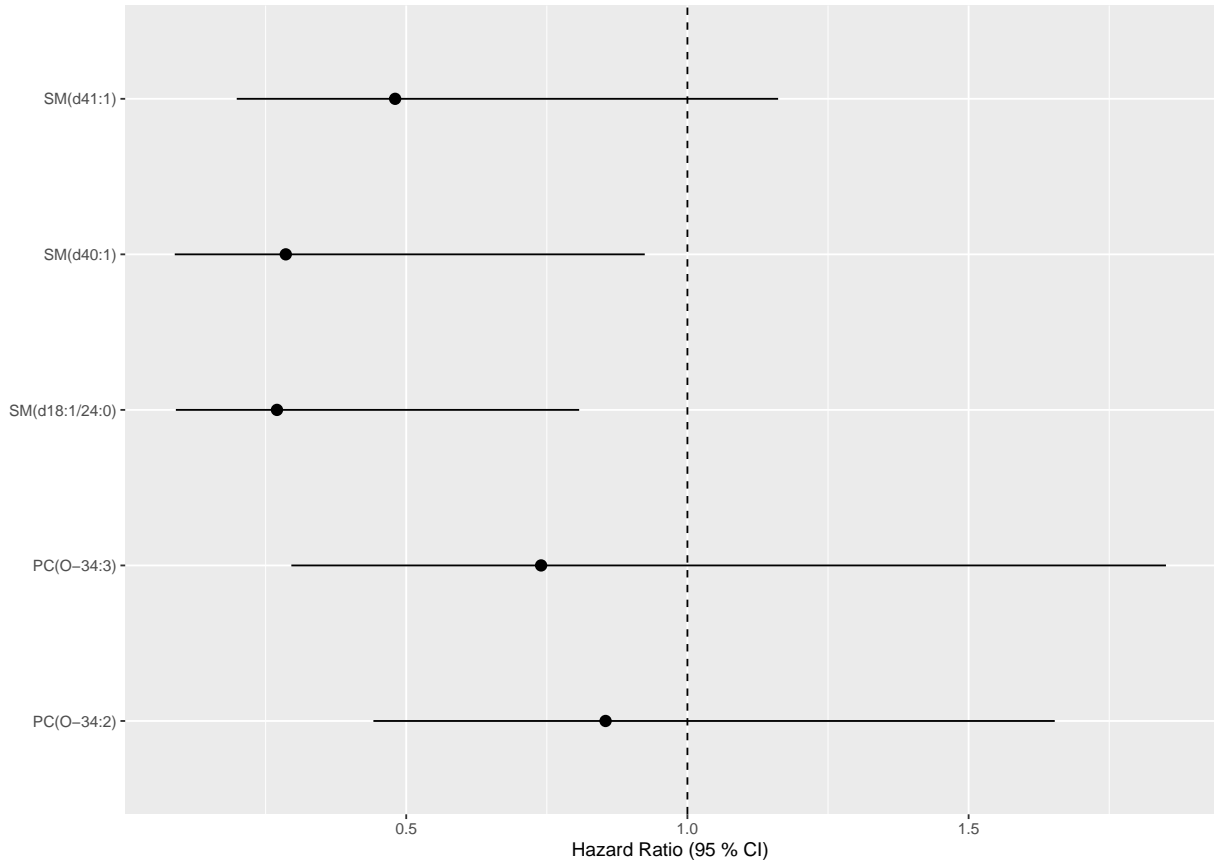

Figure 22: Forest plot of hazard ratios from the adjusted survival model for the albuminuria group progression. The hazard ratio and its 95 % confidence intervals (x-axis) are shown for each lipid (rows).

#### 4.1.2.3 Forest Plot

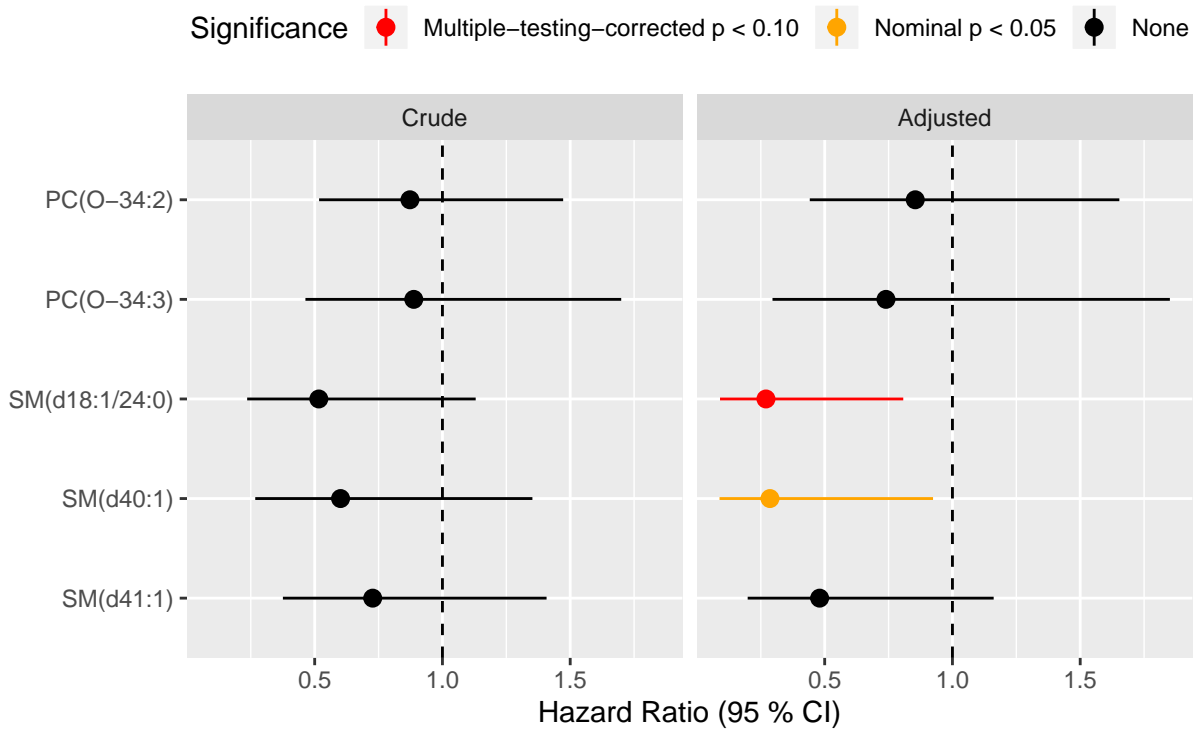

Figure 23: Combined Forest plot of hazard ratios from the crude and adjusted survival models (left and right, respectively) for the albuminuria group progression. The hazard ratio and its 95 % confidence intervals (x-axis) are shown for each lipid (rows).

#### 4.1.3 Combined Forest Plot from Crude and Adjusted Models



## 4.2 Step 4B: All-Cause Mortality

### 4.2.1 Crude Model

#### 4.2.1.1 Table

Table 5: Crude survival model for all-cause mortality. Shown in the table are the name of the lipid (Name), the hazard ratio ( $\exp(\text{coef})$ ) and its lower and upper confidence intervals (lower .95 and upper .95, respectively), p-value of the coefficient ( $\Pr(>|z|)$ ), and the p-value after correction for multiple testing (p.adj).

| Name           | $\exp(\text{coef})$ | lower .95 | upper .95 | $\Pr(> z )$ | p.adj    |
|----------------|---------------------|-----------|-----------|-------------|----------|
| SM(d41:1)      | 0.327               | 0.221     | 0.483     | 0.00e+00    | 1.00e-07 |
| SM(d40:1)      | 0.232               | 0.130     | 0.416     | 9.00e-07    | 3.60e-06 |
| PC(O-34:3)     | 0.364               | 0.223     | 0.592     | 4.67e-05    | 1.40e-04 |
| SM(d18:1/24:0) | 0.318               | 0.176     | 0.575     | 1.49e-04    | 2.99e-04 |
| PC(O-34:2)     | 0.475               | 0.317     | 0.710     | 2.91e-04    | 2.99e-04 |

#### 4.2.1.2 Heatmaps

```
## Label Relation p.adj
## 1    # p.adj < 0.01
## 2    x p.adj < 0.05
## 3    * p.adj < 0.10
```

## All-Cause Mortality

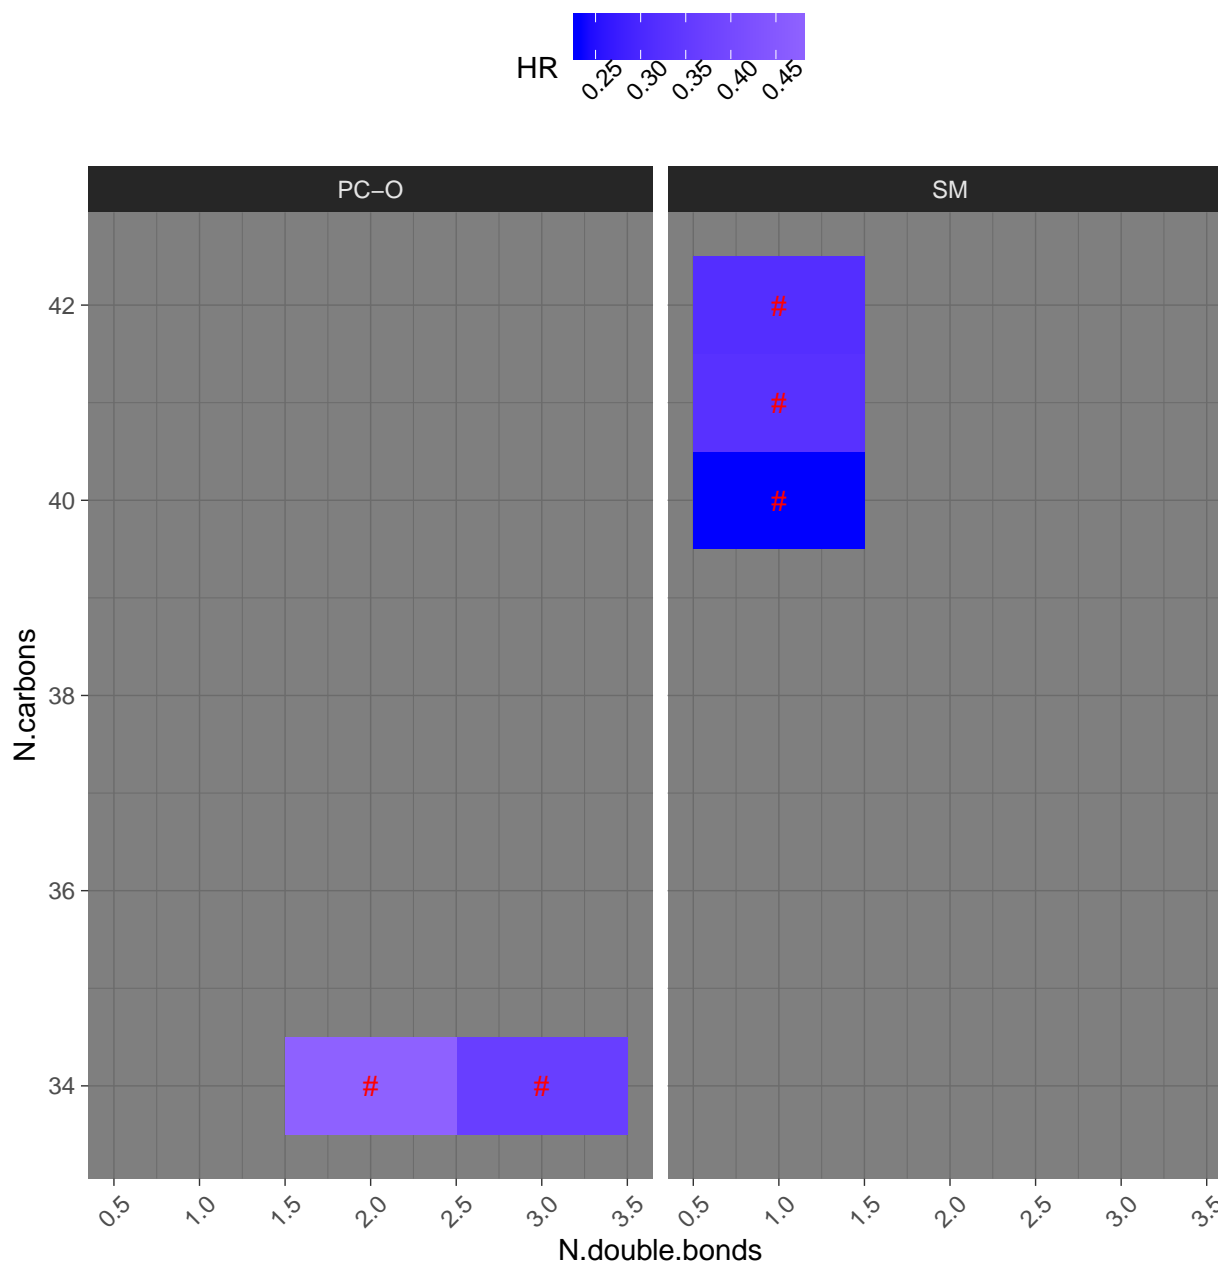

Figure 24: Heatmap of the lipid-specific hazard ratios (HRs) from the crude survival model for all-cause mortality. Lipids are organized into panels (columns) by their class (from PC-O to SM). One colored rectangle corresponds to one lipid species, where the coordinates in the x-axis and y-axis, respectively, show the number of double bonds (N.double.bonds) and the number of carbon atoms (N.carbons) in the fatty acid chains of the lipid. The number of double bonds corresponds to the number of unsaturated bonds in the fatty acid chains, and the number of carbon atoms corresponds to the length of the fatty acid chains and, thus, the size of the lipid. The magnitude of the lipid-specific hazard ratio is shown as the color of the rectangle (blue: inverse association; red: positive association). Associations with statistical significance are annotated with symbols #, x and \*, respectively, corresponding to  $p < 0.01$ ,  $p < 0.05$  and  $p < 0.1$ .

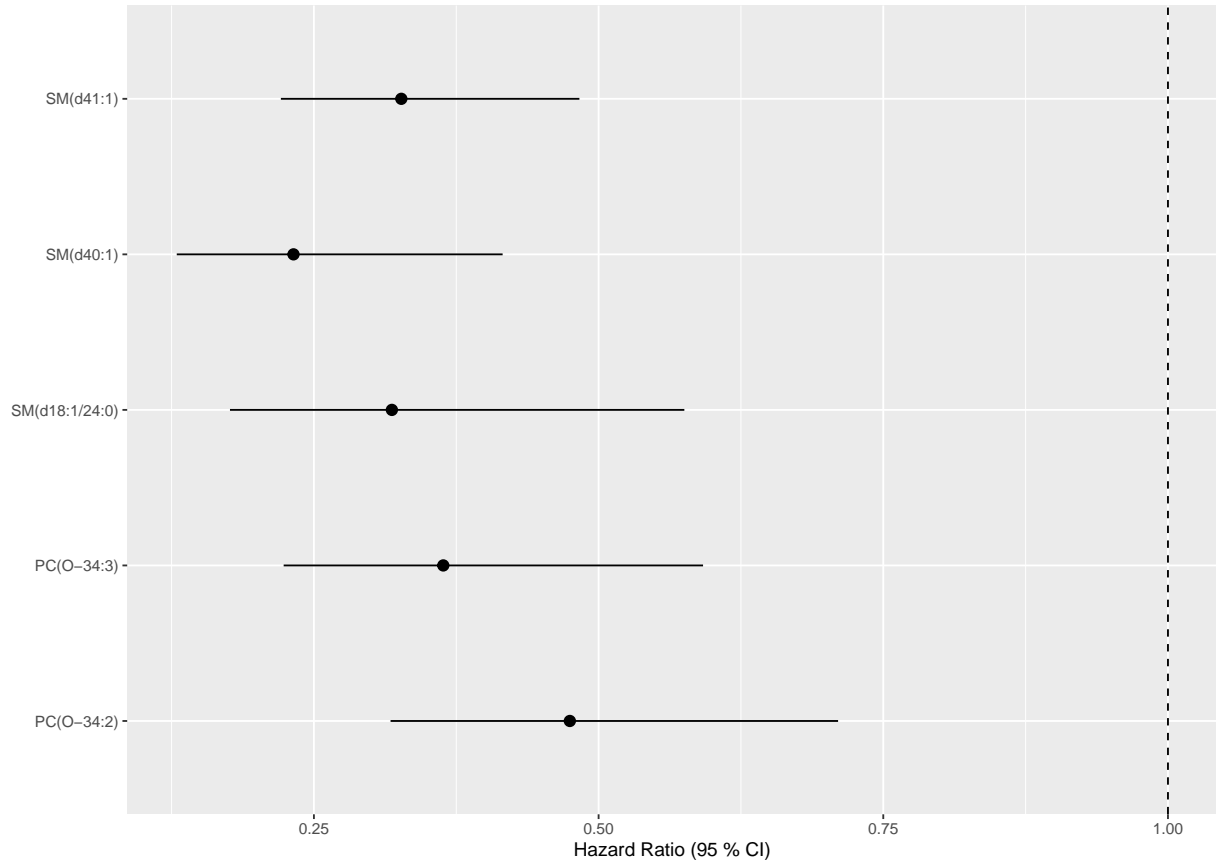

Figure 25: Forest plot of hazard ratios from the crude survival model for all-cause mortality. The hazard ratio and its 95 % confidence intervals (x-axis) are shown for each lipid (rows).

#### 4.2.1.3 Forest Plot

## 4.2.2 Adjusted Model

#### 4.2.2.1 Table

Table 6: Adjusted survival model for all-cause mortality. Shown in the table are the name of the lipid (Name), the hazard ratio ( $\exp(\text{coef})$ ) and its lower and upper confidence intervals (lower .95 and upper .95, respectively), p-value of the coefficient ( $\Pr(>|z|)$ ), and the p-value after correction for multiple testing (p.adj).

| Name           | $\exp(\text{coef})$ | lower .95 | upper .95 | $\Pr(> z )$ | p.adj   |
|----------------|---------------------|-----------|-----------|-------------|---------|
| SM(d41:1)      | 0.354               | 0.193     | 0.649     | 0.000803    | 0.00401 |
| SM(d40:1)      | 0.327               | 0.143     | 0.747     | 0.008050    | 0.03220 |
| PC(O-34:3)     | 0.469               | 0.239     | 0.920     | 0.027700    | 0.08310 |
| PC(O-34:2)     | 0.623               | 0.385     | 1.010     | 0.053600    | 0.10700 |
| SM(d18:1/24:0) | 0.577               | 0.257     | 1.300     | 0.184000    | 0.18400 |

#### 4.2.2.2 Heatmaps

```
##   Label Relation p.adj
## 1    # p.adj < 0.01
## 2    x p.adj < 0.05
## 3    * p.adj < 0.10
```



## All-Cause Mortality

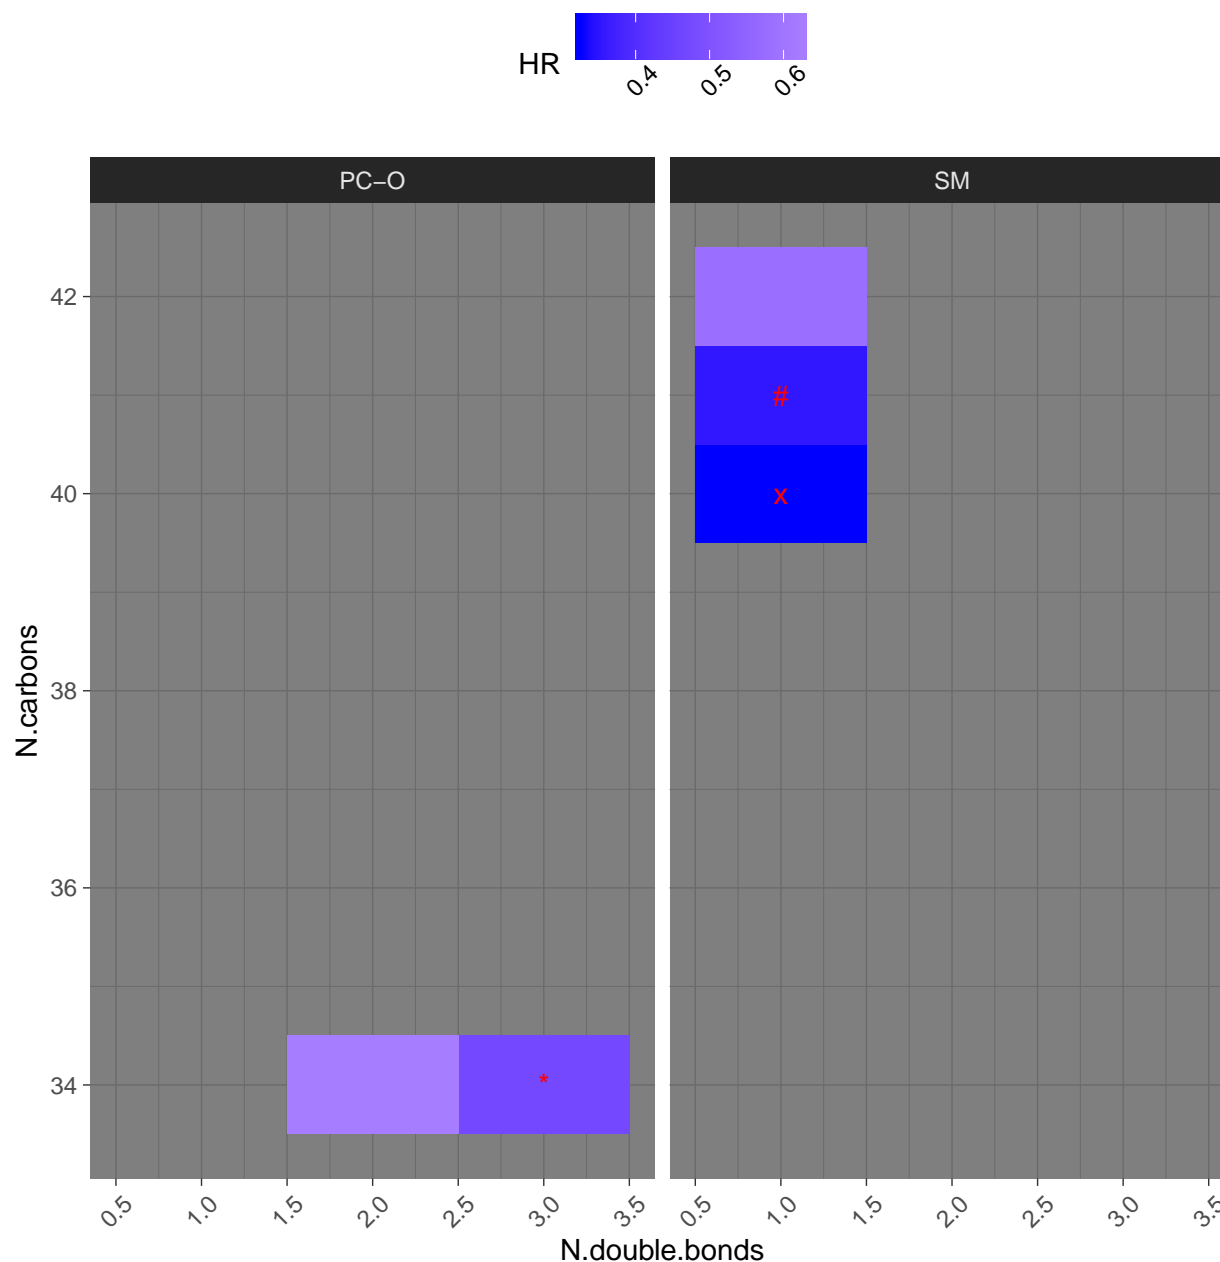

Figure 26: Heatmap of the lipid-specific hazard ratios (HRs) from the adjusted survival model for all-cause mortality. Lipids are organized into panels (columns) by their class (from PC-O to SM). One colored rectangle corresponds to one lipid species, where the coordinates in the x-axis and y-axis, respectively, show the number of double bonds (N.double.bonds) and the number of carbon atoms (N.carbons) in the fatty acid chains of the lipid. The number of double bonds corresponds to the number of unsaturated bonds in the fatty acid chains, and the number of carbon atoms corresponds to the length of the fatty acid chains and, thus, the size of the lipid. The magnitude of the lipid-specific hazard ratio is shown as the color of the rectangle (blue: inverse association; red: positive association). Associations with statistical significance are annotated with symbols #, x and \*, respectively, corresponding to  $p < 0.01$ ,  $p < 0.05$  and  $p < 0.1$ .

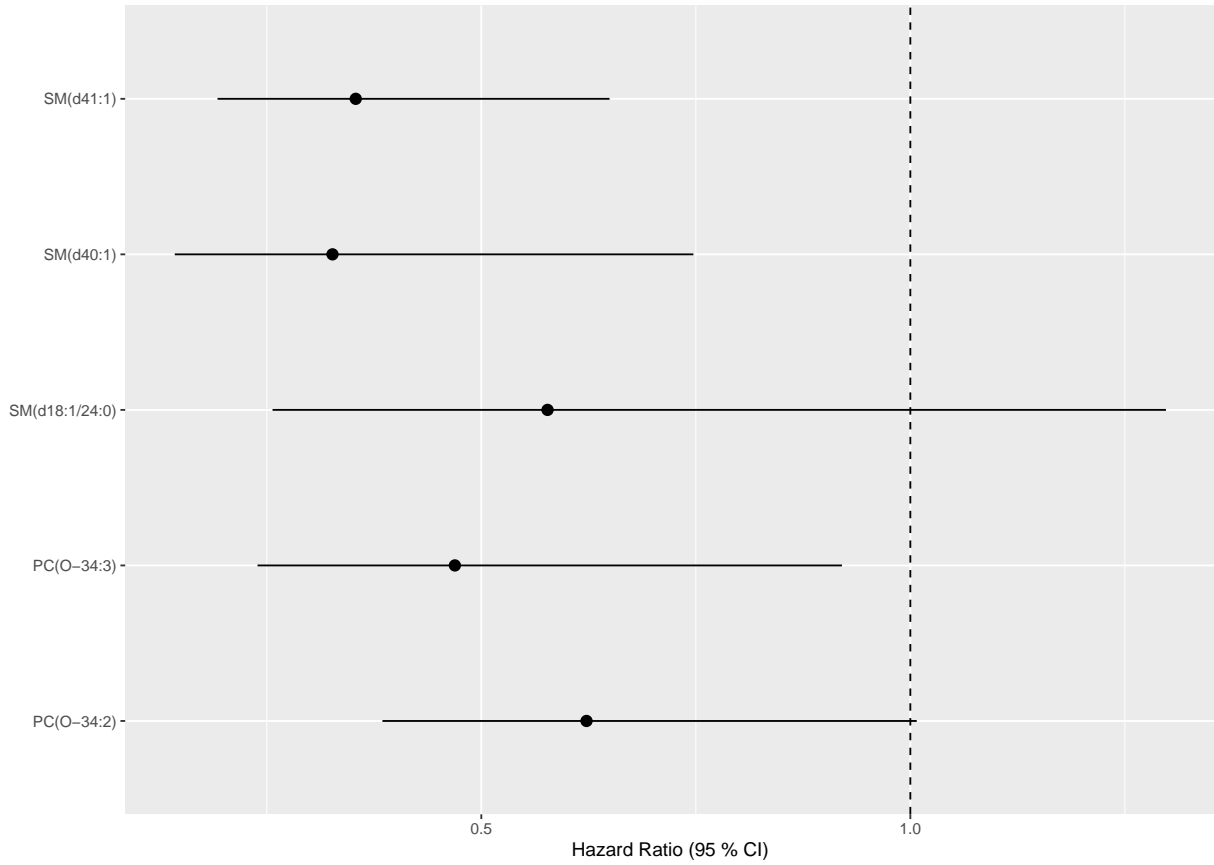

Figure 27: Forest plot of hazard ratios from the adjusted survival model for all-cause mortality. The hazard ratio and its 95 % confidence intervals (x-axis) are shown for each lipid (rows).

#### 4.2.2.3 Forest Plot

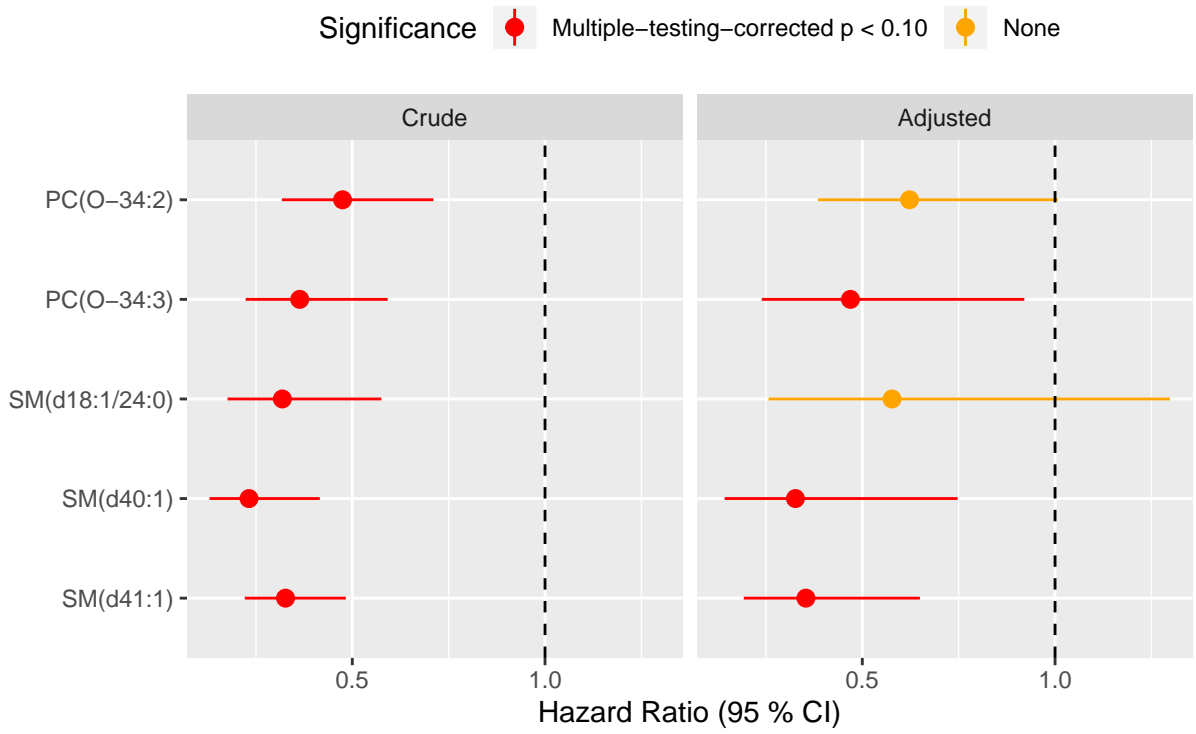

Figure 28: Combined forest plot of hazard ratios from the crude and adjusted survival models (left and right, respectively) for all-cause mortality. The hazard ratio and its 95 % confidence intervals (x-axis) are shown for each lipid (rows).

#### 4.2.3 Combined Forest Plot

### 4.3 Step 4C: eGFR Decline > 30 %

#### 4.3.1 Crude Model

#### 4.3.1.1 Table

Table 7: Crude survival model for eGFR decline > 30 %. Shown in the table are the name of the lipid (Name), the hazard ratio ( $\exp(\text{coef})$ ) and its lower and upper confidence intervals (lower .95 and upper .95, respectively), p-value of the coefficient ( $\Pr(>|z|)$ ), and the p-value after correction for multiple testing (p.adj).

| Name           | $\exp(\text{coef})$ | lower .95 | upper .95 | $\Pr(> z )$ | p.adj  |
|----------------|---------------------|-----------|-----------|-------------|--------|
| PC(O-34:3)     | 0.544               | 0.363     | 0.817     | 0.00332     | 0.0166 |
| PC(O-34:2)     | 0.722               | 0.521     | 1.000     | 0.04980     | 0.1990 |
| SM(d40:1)      | 0.773               | 0.457     | 1.310     | 0.33800     | 1.0000 |
| SM(d18:1/24:0) | 0.794               | 0.482     | 1.310     | 0.36600     | 1.0000 |
| SM(d41:1)      | 0.839               | 0.541     | 1.300     | 0.43300     | 1.0000 |

### 4.3.1.2 Heatmaps

```
##  Label Relation p.adj
## 1   # p.adj < 0.01
## 2   x p.adj < 0.05
## 3   * p.adj < 0.10
```

## GFR Decline of Over 30 %

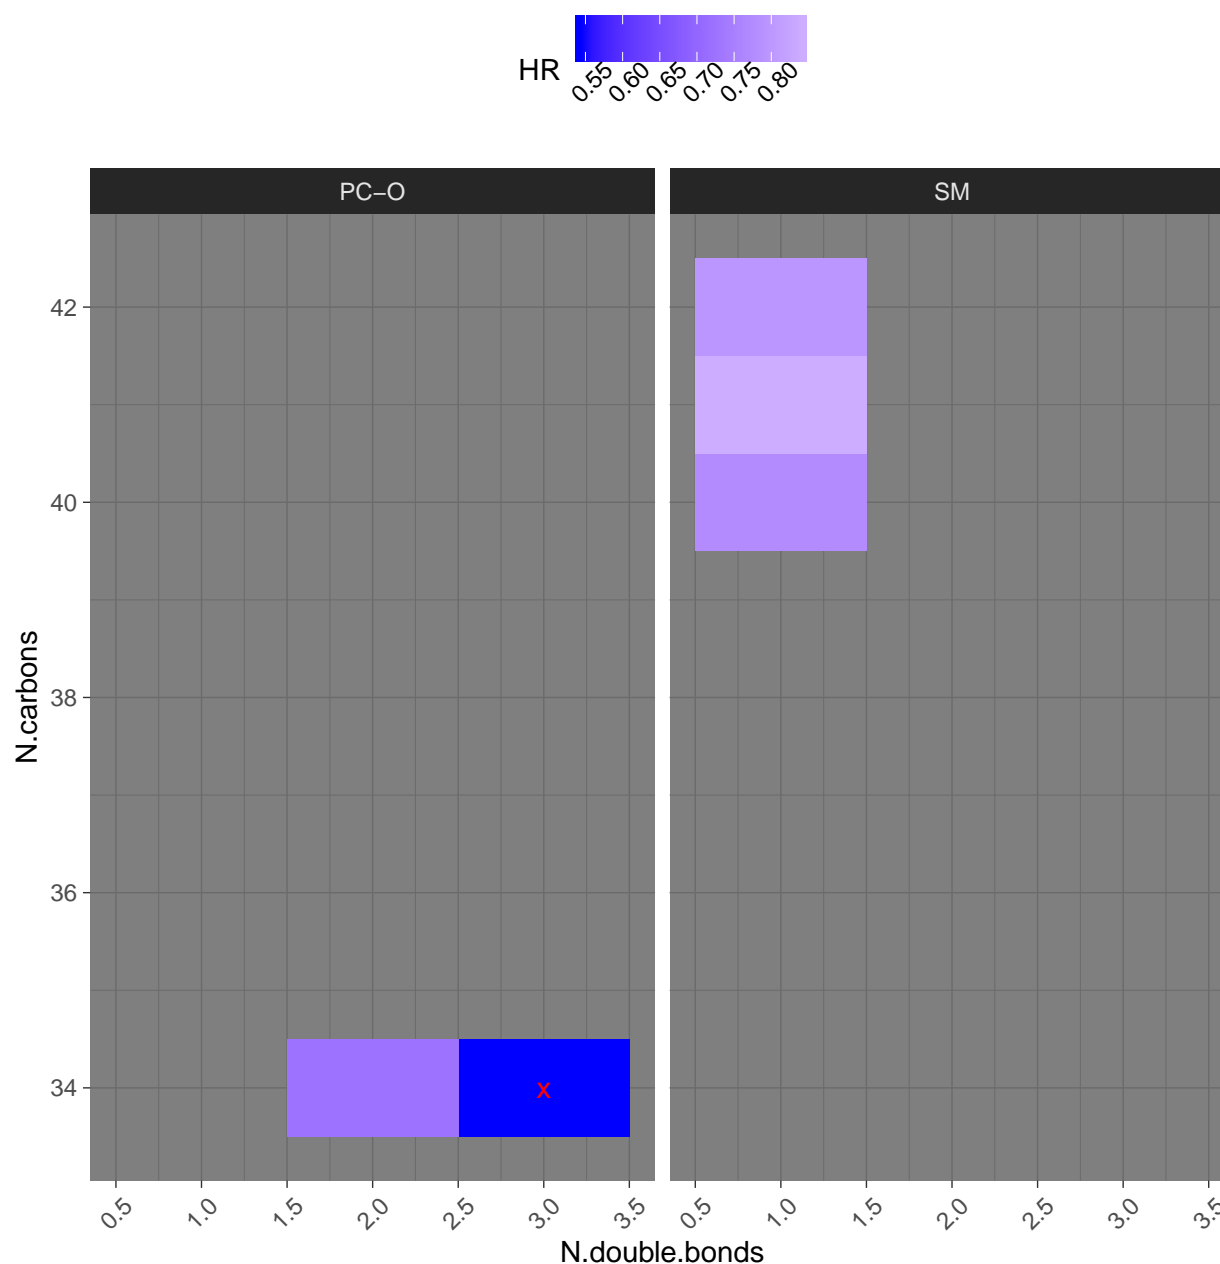

Figure 29: Heatmap of the lipid-specific hazard ratios (HRs) from the crude survival model for eGFR decline (> 30 %). Lipids are organized into panels (columns) by their class (from PC-O to SM). One colored rectangle corresponds to one lipid species, where the coordinates in the x-axis and y-axis, respectively, show the number of double bonds (N.double.bonds) and the number of carbon atoms (N.carbons) in the fatty acid chains of the lipid. The number of double bonds corresponds to the number of unsaturated bonds in the fatty acid chains, and the number of carbon atoms corresponds to the length of the fatty acid chains and, thus, the size of the lipid. The magnitude of the lipid-specific hazard ratio is shown as the color of the rectangle (blue: inverse association; red: positive association). Associations with statistical significance are annotated with symbols #, x and \*, respectively, corresponding to  $p < 0.01$ ,  $p < 0.05$  and  $p < 0.1$ .

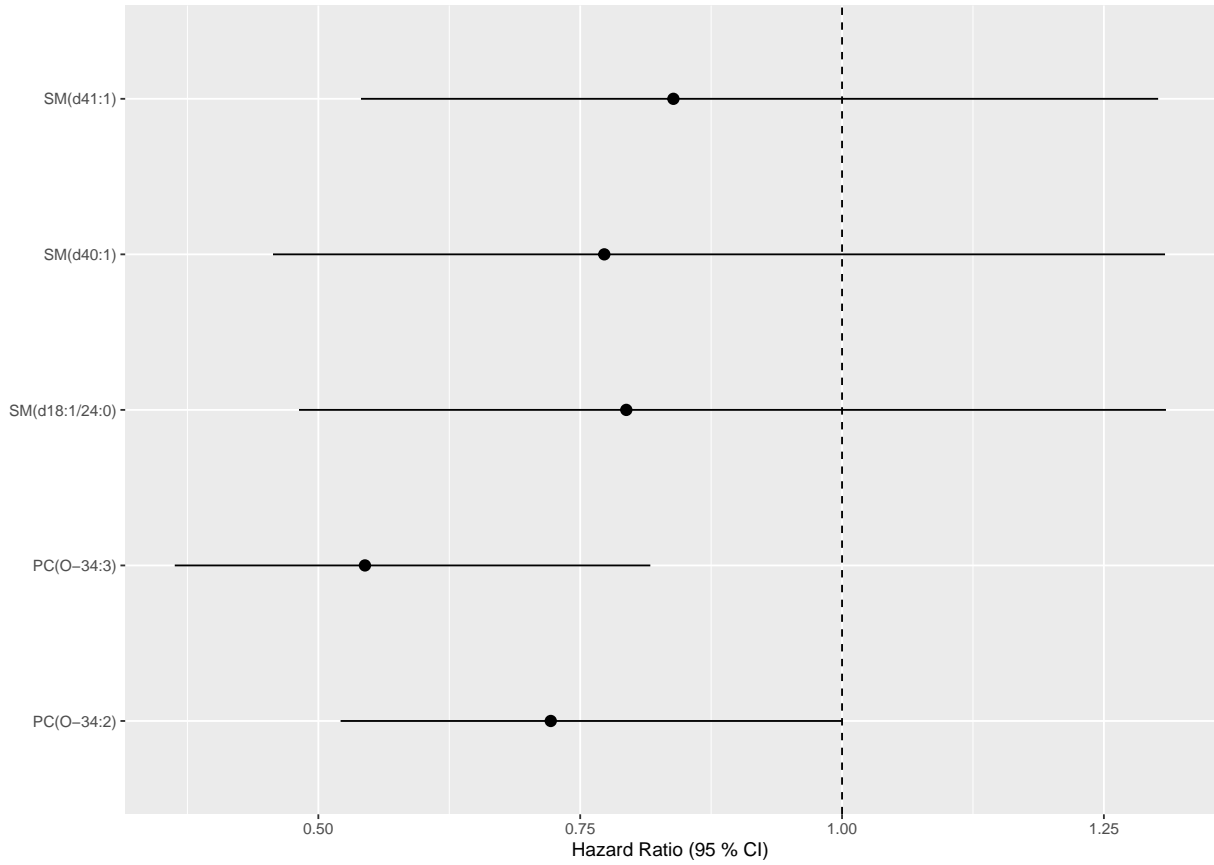

Figure 30: Forest plot of hazard ratios from the crude survival model for eGFR decline ( $> 30\%$ ). The hazard ratio and its 95 % confidence intervals (x-axis) are shown for each lipid (rows).

#### 4.3.1.3 Forest Plot



### 4.3.2 Adjusted Model

### 4.3.2.1 Table

Table 8: Adjusted survival model for eGFR decline > 30 %. Shown in the table are the name of the lipid (Name), the hazard ratio (exp(coef)) and its lower and upper confidence intervals (lower .95 and upper .95, respectively), p-value of the coefficient (Pr(>|z|), and the p-value after correction for multiple testing (p.adj).

| Name           | exp(coef) | lower .95 | upper .95 | Pr(> z ) | p.adj |
|----------------|-----------|-----------|-----------|----------|-------|
| SM(d40:1)      | 0.598     | 0.293     | 1.22      | 0.159    | 0.794 |
| PC(O-34:2)     | 0.866     | 0.597     | 1.26      | 0.448    | 1.000 |
| SM(d18:1/24:0) | 0.774     | 0.390     | 1.54      | 0.466    | 1.000 |
| SM(d41:1)      | 0.819     | 0.455     | 1.47      | 0.506    | 1.000 |
| PC(O-34:3)     | 0.909     | 0.547     | 1.51      | 0.714    | 1.000 |

### 4.3.2.2 Heatmaps

```
## Label Relation p.adj
## 1 # p.adj < 0.01
## 2 x p.adj < 0.05
## 3 * p.adj < 0.10
```

## eGFR Decline > 30 %

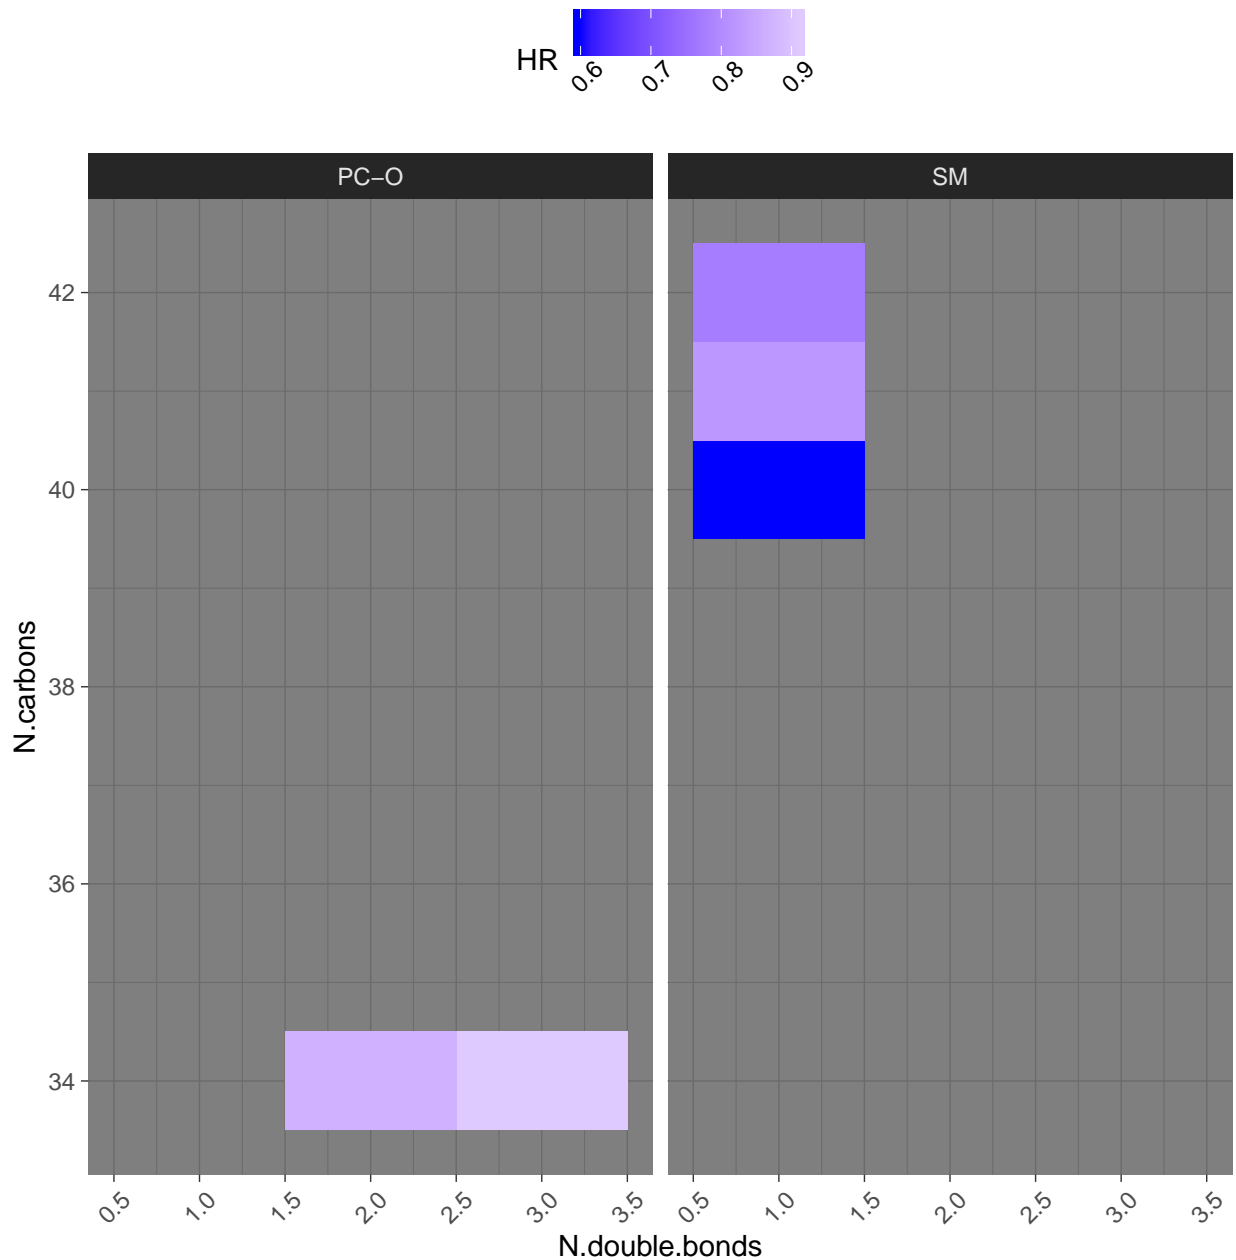

Figure 31: Heatmap of the lipid-specific hazard ratios (HRs) from the adjusted survival model for eGFR decline (> 30 %). Lipids are organized into panels (columns) by their class (from PC-O to SM). One colored rectangle corresponds to one lipid species, where the coordinates in the x-axis and y-axis, respectively, show the number of double bonds (N.double.bonds) and the number of carbon atoms (N.carbons) in the fatty acid chains of the lipid. The number of double bonds corresponds to the number of unsaturated bonds in the fatty acid chains, and the number of carbon atoms corresponds to the length of the fatty acid chains and, thus, the size of the lipid. The magnitude of the lipid-specific hazard ratio is shown as the color of the rectangle (blue: inverse association; red: positive association). Associations with statistical significance are annotated with symbols #, x and \*, respectively, corresponding to  $p < 0.01$ ,  $p < 0.05$  and  $p < 0.1$ .

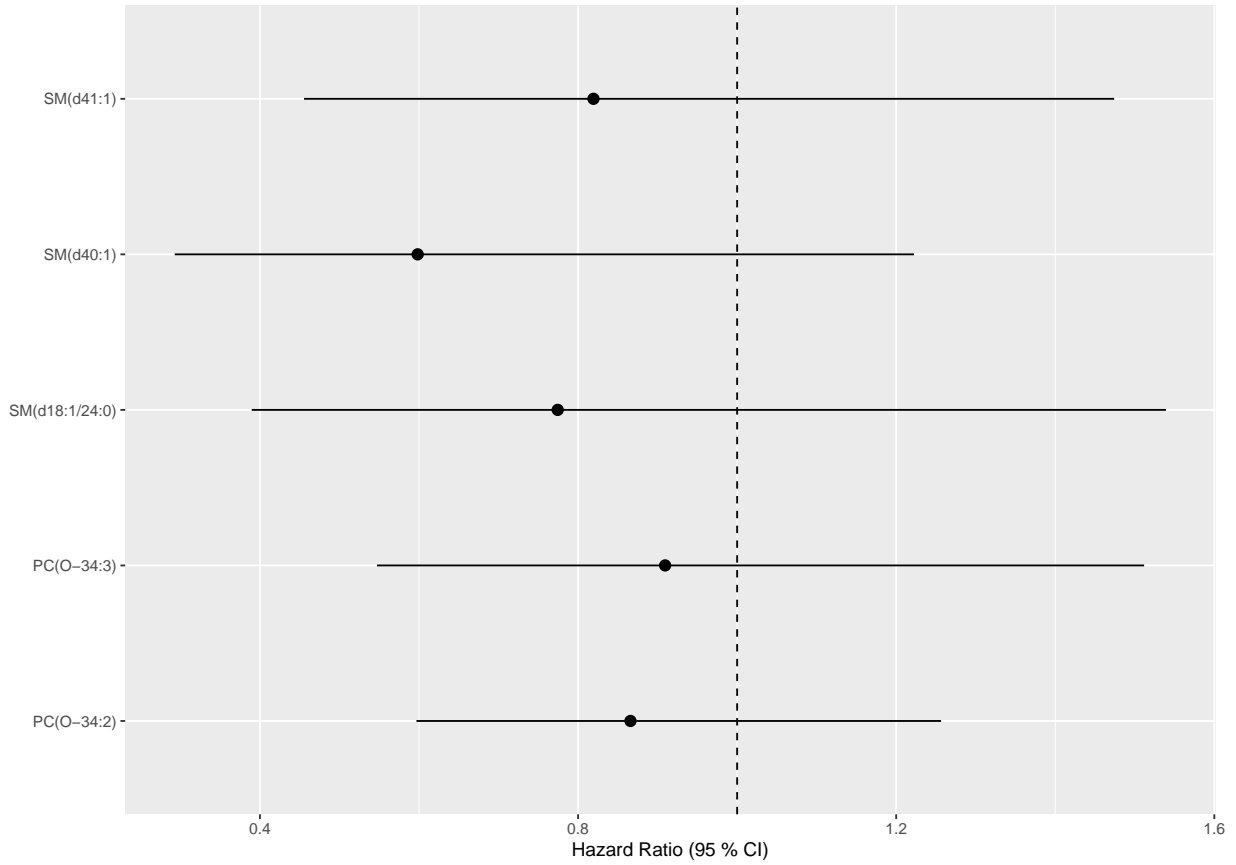

Figure 32: Forest plot of hazard ratios from the adjusted survival model for eGFR decline ( $> 30\%$ ). The hazard ratio and its 95 % confidence intervals (x-axis) are shown for each lipid (rows).

#### 4.3.2.3 Forest Plot

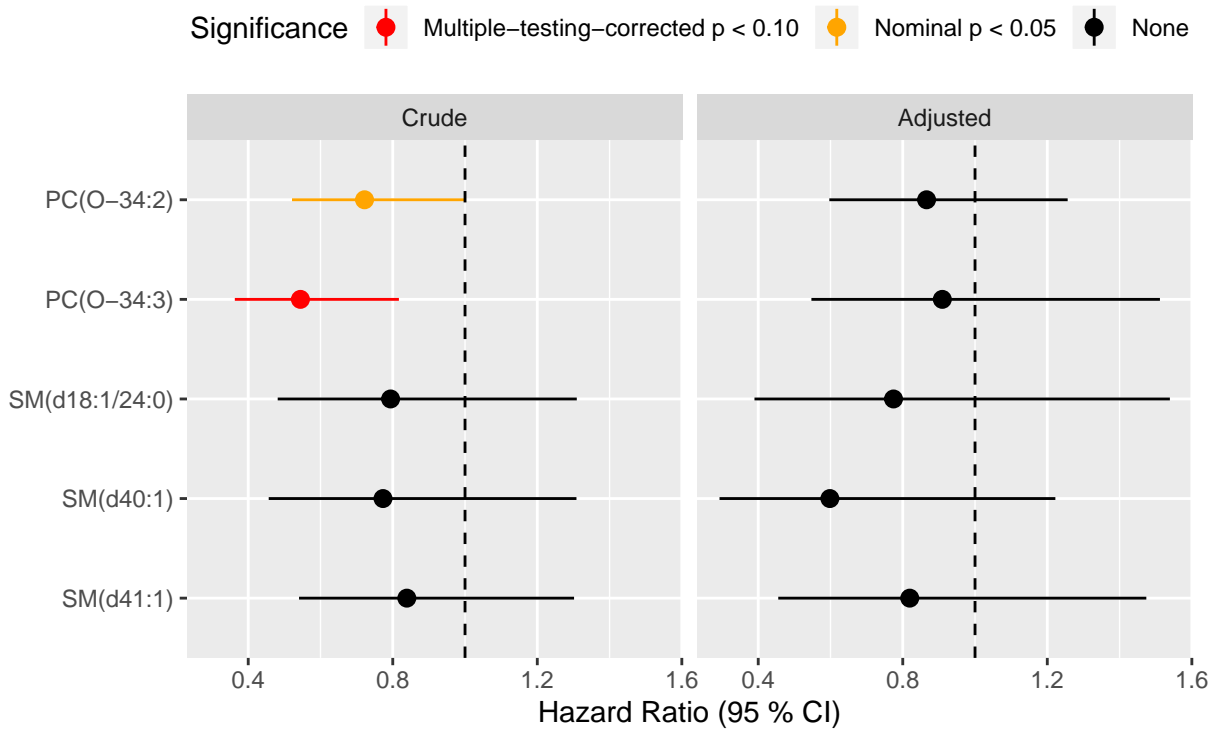

Figure 33: Combined forest plot of hazard ratios from the crude and adjusted survival models (left and right, respectively) for eGFR decline ( $>30\%$ ). The hazard ratio and its 95 % confidence intervals (x-axis) are shown for each lipid (rows).

#### 4.3.3 Combined Forest Plot from Crude and Adjusted Models

## 4.4 Step 4D: End-Stage Renal Disease

### 4.4.1 Crude Model

#### 4.4.1.1 Table

Table 9: Crude survival model for end-stage renal disease. Shown in the table are the name of the lipid (Name), the hazard ratio ( $\exp(\text{coef})$ ) and its lower and upper confidence intervals (lower .95 and upper .95, respectively), p-value of the coefficient ( $\Pr(>|z|)$ ), and the p-value after correction for multiple testing (p.adj).

| Name           | $\exp(\text{coef})$ | lower .95 | upper .95 | $\Pr(> z )$ | p.adj    |
|----------------|---------------------|-----------|-----------|-------------|----------|
| PC(O-34:3)     | 0.192               | 0.0908    | 0.404     | 1.43e-05    | 7.15e-05 |
| SM(d18:1/24:0) | 0.203               | 0.0810    | 0.509     | 6.76e-04    | 2.70e-03 |
| SM(d40:1)      | 0.279               | 0.1090    | 0.717     | 8.03e-03    | 2.41e-02 |
| SM(d41:1)      | 0.404               | 0.2050    | 0.796     | 8.87e-03    | 2.41e-02 |
| PC(O-34:2)     | 0.543               | 0.2850    | 1.040     | 6.36e-02    | 6.36e-02 |

#### 4.4.1.2 Heatmaps

```
## Label Relation p.adj
## 1 # p.adj < 0.01
## 2 x p.adj < 0.05
## 3 * p.adj < 0.10
```



## End-Stage Renal Disease

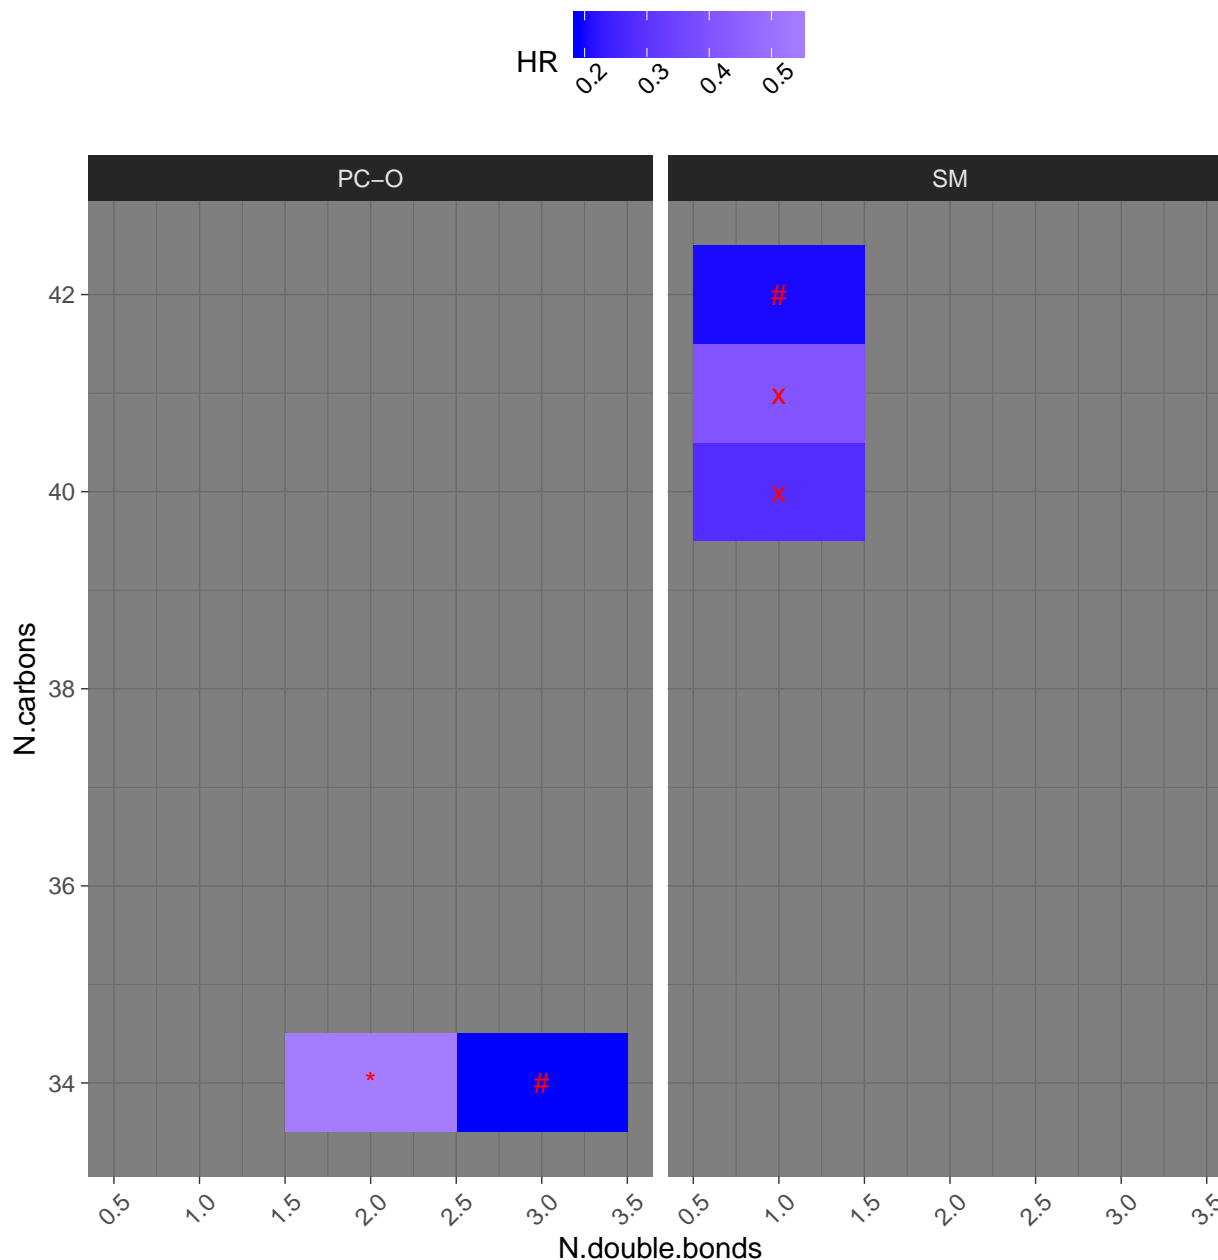

Figure 34: Heatmap of the lipid-specific hazard ratios (HRs) from the crude survival model for end-stage renal disease. Lipids are organized into panels (columns) by their class (from PC-O to SM). One colored rectangle corresponds to one lipid species, where the coordinates in the x-axis and y-axis, respectively, show the number of double bonds (N.double.bonds) and the number of carbon atoms (N.carbons) in the fatty acid chains of the lipid. The number of double bonds corresponds to the number of unsaturated bonds in the fatty acid chains, and the number of carbon atoms corresponds to the length of the fatty acid chains and, thus, the size of the lipid. The magnitude of the lipid-specific hazard ratio is shown as the color of the rectangle (blue: inverse association; red: positive association). Associations with statistical significance are annotated with symbols #, x and \*, respectively, corresponding to  $p < 0.01$ ,  $p < 0.05$  and  $p < 0.1$ .

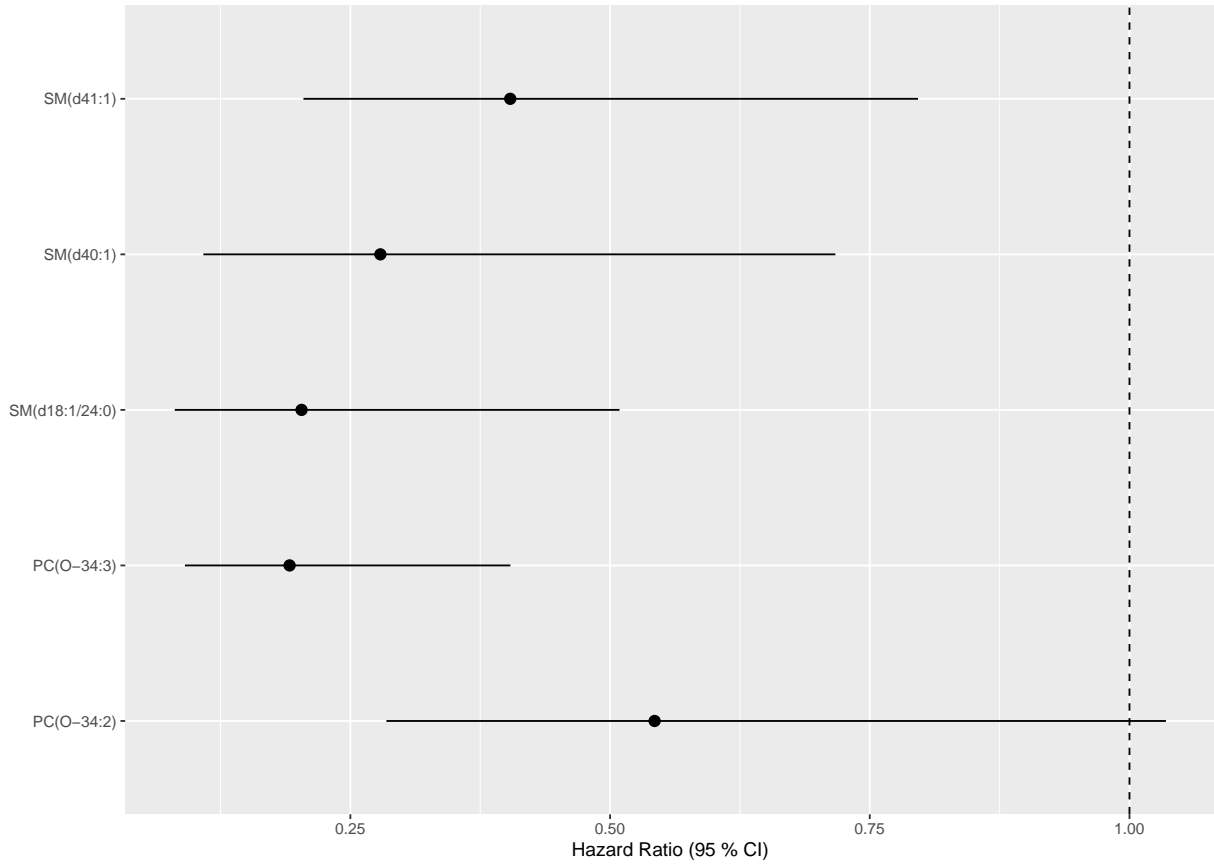

Figure 35: Forest plot of hazard ratios from the crude survival model for end-stage renal disease. The hazard ratio and its 95 % confidence intervals (x-axis) are shown for each lipid (rows).

#### 4.4.1.3 Forest Plot

#### 4.4.2 Adjusted Model

#### 4.4.2.1 Table

Table 10: Adjusted survival model for end stage renal disease. Shown in the table are the name of the lipid (Name), the hazard ratio ( $\exp(\text{coef})$ ) and its lower and upper confidence intervals (lower .95 and upper .95, respectively), p-value of the coefficient ( $\Pr(>|z|)$ ), and the p-value after correction for multiple testing (p.adj).

| Name           | $\exp(\text{coef})$ | lower .95 | upper .95 | $\Pr(> z )$ | p.adj |
|----------------|---------------------|-----------|-----------|-------------|-------|
| SM(d41:1)      | 0.531               | 0.147     | 1.92      | 0.335       | 1     |
| SM(d40:1)      | 0.524               | 0.107     | 2.57      | 0.426       | 1     |
| SM(d18:1/24:0) | 0.687               | 0.178     | 2.66      | 0.586       | 1     |
| PC(O-34:3)     | 0.785               | 0.251     | 2.45      | 0.676       | 1     |
| PC(O-34:2)     | 0.917               | 0.389     | 2.16      | 0.842       | 1     |

#### 4.4.2.2 Heatmaps

```
## Label Relation p.adj
## 1 # p.adj < 0.01
## 2 x p.adj < 0.05
## 3 * p.adj < 0.10
```

## End-Stage Renal Disease

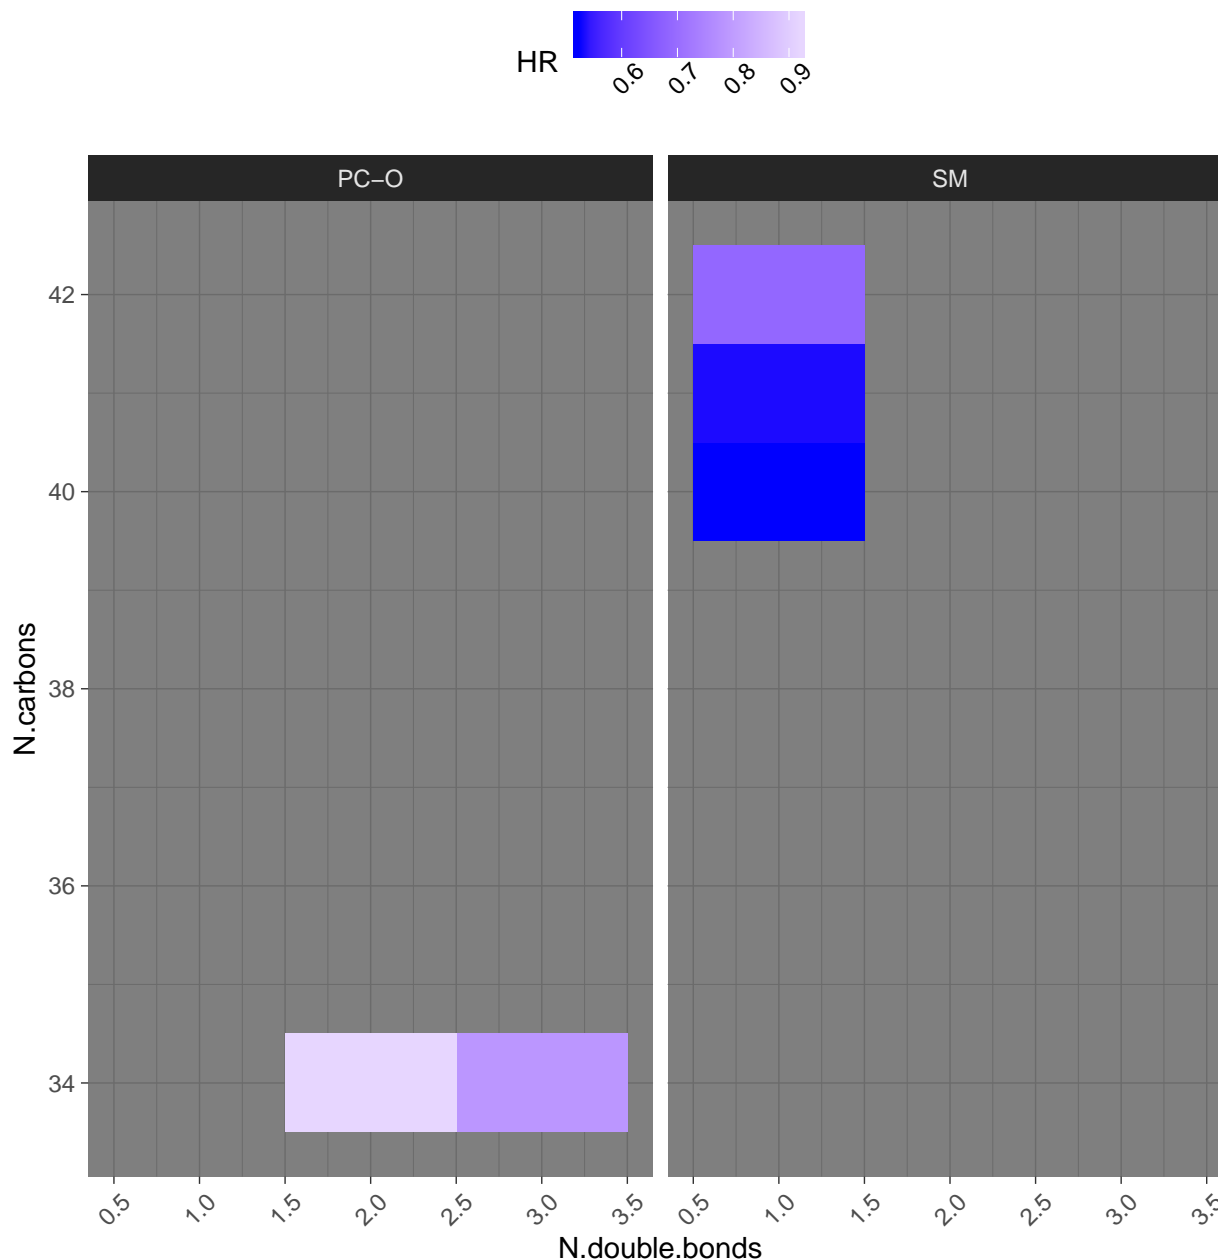

Figure 36: Heatmap of the lipid-specific hazard ratios (HRs) from the adjusted survival model for end-stage renal disease. Lipids are organized into panels (columns) by their class (from PC-O to SM). One colored rectangle corresponds to one lipid species, where the coordinates in the x-axis and y-axis, respectively, show the number of double bonds (N.double.bonds) and the number of carbon atoms (N.carbons) in the fatty acid chains of the lipid. The number of double bonds corresponds to the number of unsaturated bonds in the fatty acid chains, and the number of carbon atoms corresponds to the length of the fatty acid chains and, thus, the size of the lipid. The magnitude of the lipid-specific hazard ratio is shown as the color of the rectangle (blue: inverse association; red: positive association). Associations with statistical significance are annotated with symbols #, x and \*, respectively, corresponding to  $p < 0.01$ ,  $p < 0.05$  and  $p < 0.1$ .

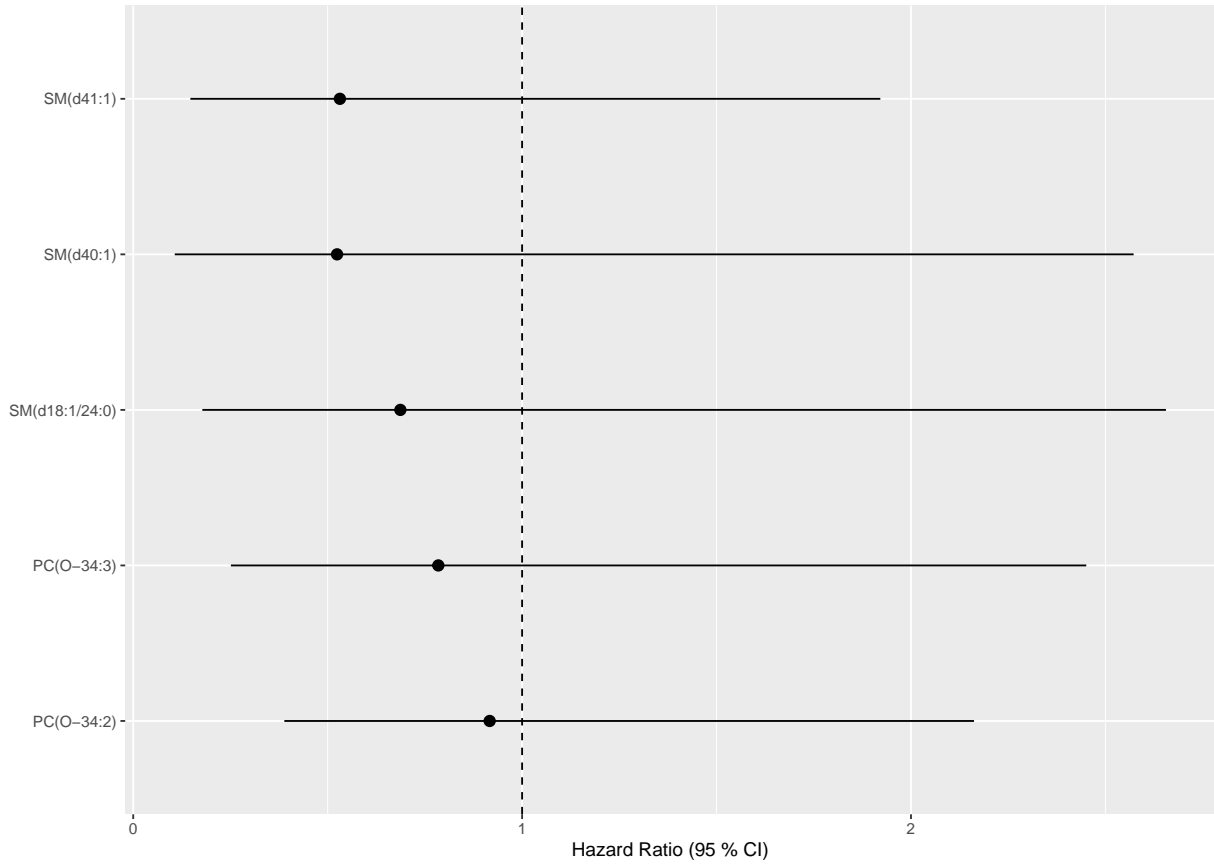

Figure 37: Forest plot of hazard ratios from the adjusted survival model for end-stage renal disease. The hazard ratio and its 95 % confidence intervals (x-axis) are shown for each lipid (rows).

#### 4.4.2.3 Forest Plot

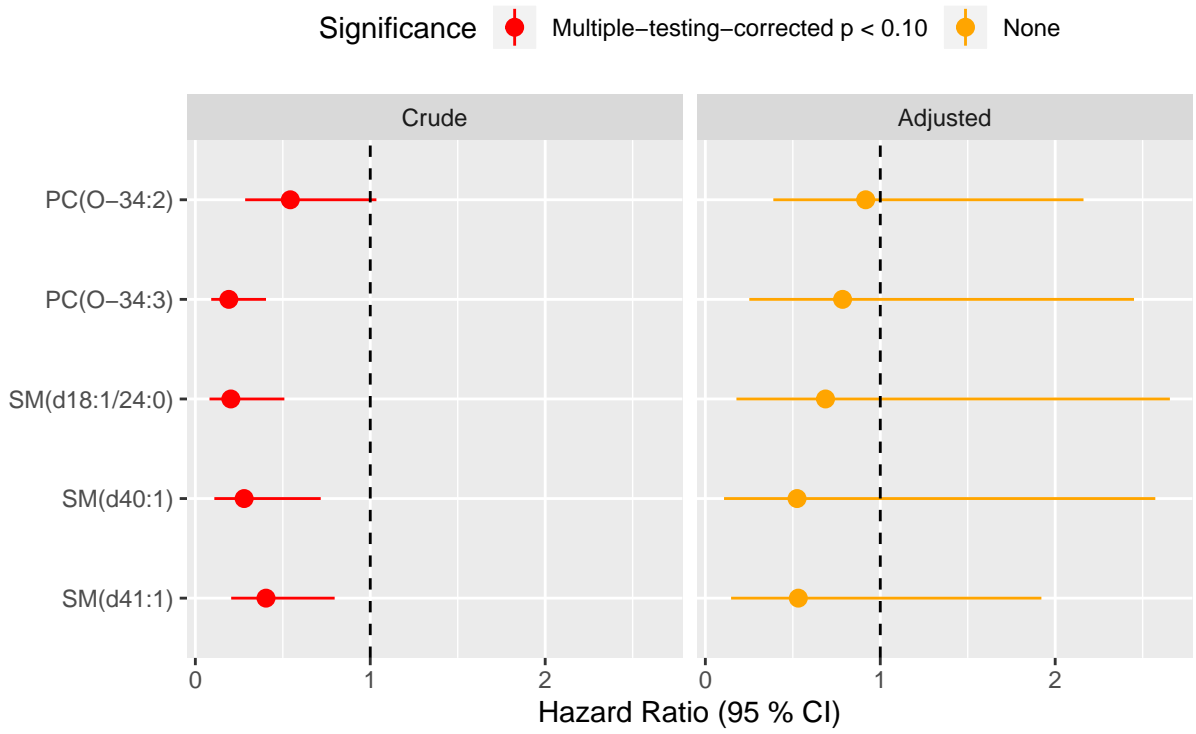

Figure 38: Combined forest plot of hazard ratios from the crude and adjusted survival models for end-stage renal disease. The hazard ratio and its 95 % confidence intervals (x-axis) are shown for each lipid (rows).

#### 4.4.3 Combined Forest Plot from Crude and Adjusted Models

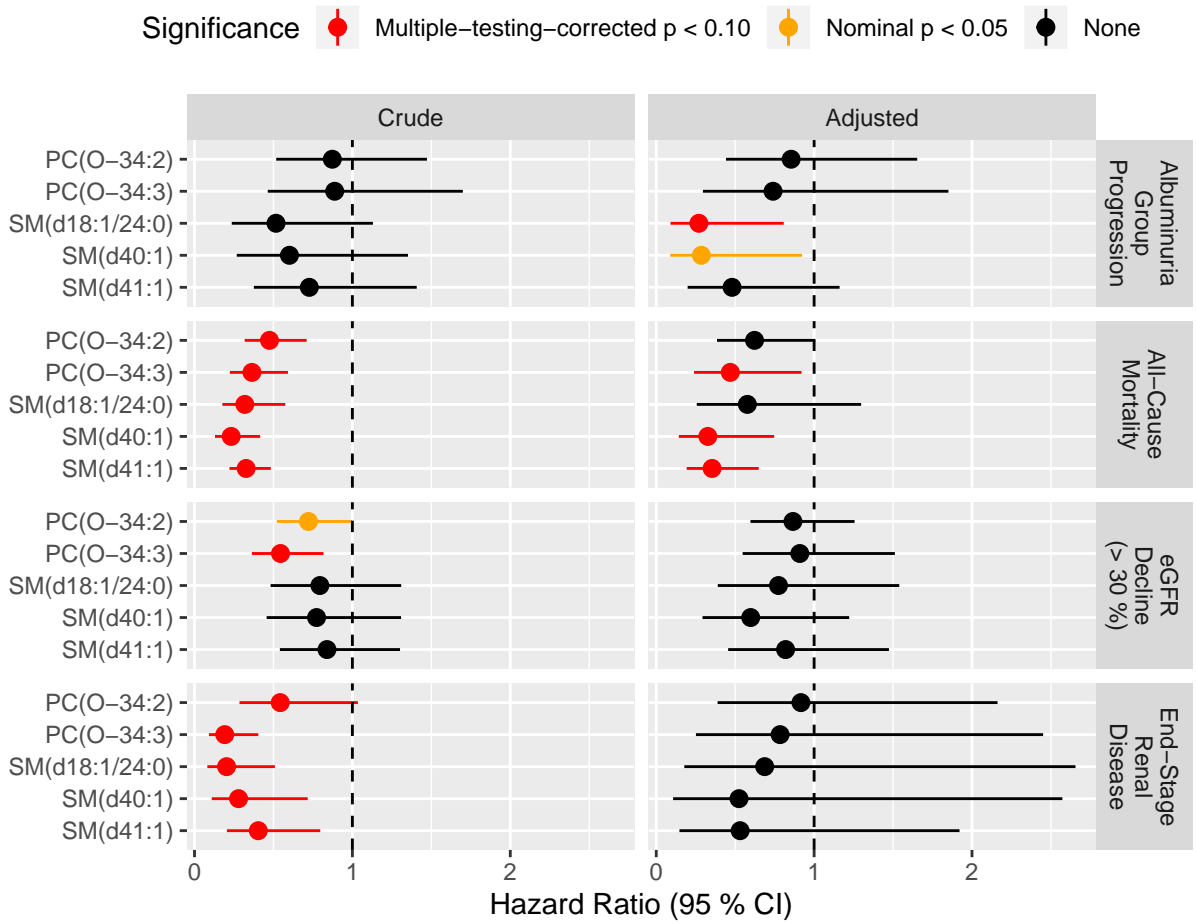

Figure 39: Compilation forest plot of hazard ratios from the crude and adjusted (left and right, respectively) survival models for the four endpoints (row-wise panels). The endpoints are albuminuria group progression, all-cause mortality, eGFR decline (> 30 %) and end-stage renal disease. The hazard ratio and its 95 % confidence intervals (x-axis) are shown for each lipid (rows).

#### 4.5 Compilation Forest Plot from Steps 4A-D



## 5 Step 5: Detailed Assessment of the Top-Lipid in Relation to All-Cause Mortality

### 5.1 Step 5A: Analysis of Full Cohort

#### 5.1.1 Survival Model with Details

```
## Call:
## survival::coxph(formula = survival::Surv(time = t_doeed_profil,
##     event = censor_doeed_profil.reversed.numeric) ~ SM.d41.1 +
##     Age + BMI + BP_Systolic + Cholesterol + eGFR + HbA1c + Medication_Statins +
##     Sex + Smoking + TG_total_log + UAER_log, data = data.survival)
##
## n= 615, number of events= 54
## (54 observations deleted due to missingness)
##
##              coef exp(coef) se(coef)      z Pr(>|z|)
## SM.d41.1      -1.039477  0.353639  0.310116 -3.352 0.000803 ***
## Age           0.084875  1.088581  0.015360  5.526 3.28e-08 ***
## BMI          -0.075662  0.927129  0.040516 -1.867 0.061835 .
## BP_Systolic   0.001151  1.001152  0.008047  0.143 0.886259
## Cholesterol  -0.030785  0.969684  0.220076 -0.140 0.888753
## eGFR         -0.011654  0.988413  0.005703 -2.043 0.041009 *
## HbA1c         0.204795  1.227274  0.136686  1.498 0.134057
## Medication_Statins 0.229558  1.258044  0.356499  0.644 0.519624
## Sex          -0.062330  0.939573  0.322626 -0.193 0.846805
## Smoking       0.457539  1.580180  0.321395  1.424 0.154561
## TG_total_log  0.128373  1.136977  0.234372  0.548 0.583876
## UAER_log     0.116122  1.123133  0.069343  1.675 0.094013 .
## ---
## Signif. codes:  0 '***' 0.001 '**' 0.01 '*' 0.05 '.' 0.1 ' ' 1
##
##              exp(coef) exp(-coef) lower .95 upper .95
## SM.d41.1          0.3536    2.8277    0.1926    0.6494
## Age               1.0886    0.9186    1.0563    1.1219
## BMI               0.9271    1.0786    0.8564    1.0038
## BP_Systolic      1.0012    0.9988    0.9855    1.0171
## Cholesterol       0.9697    1.0313    0.6299    1.4927
## eGFR              0.9884    1.0117    0.9774    0.9995
## HbA1c             1.2273    0.8148    0.9388    1.6043
## Medication_Statins 1.2580    0.7949    0.6255    2.5302
## Sex               0.9396    1.0643    0.4992    1.7683
## Smoking           1.5802    0.6328    0.8417    2.9667
## TG_total_log     1.1370    0.8795    0.7182    1.7999
## UAER_log         1.1231    0.8904    0.9804    1.2866
##
## Concordance= 0.824 (se = 0.04 )
## Rsquare= 0.123 (max possible= 0.669 )
## Likelihood ratio test= 80.61 on 12 df, p=3.16e-12
## Wald test = 65.62 on 12 df, p=2.092e-09
## Score (logrank) test = 74.8 on 12 df, p=4.002e-11
```

### Hazard Ratios for All-Cause Mortality

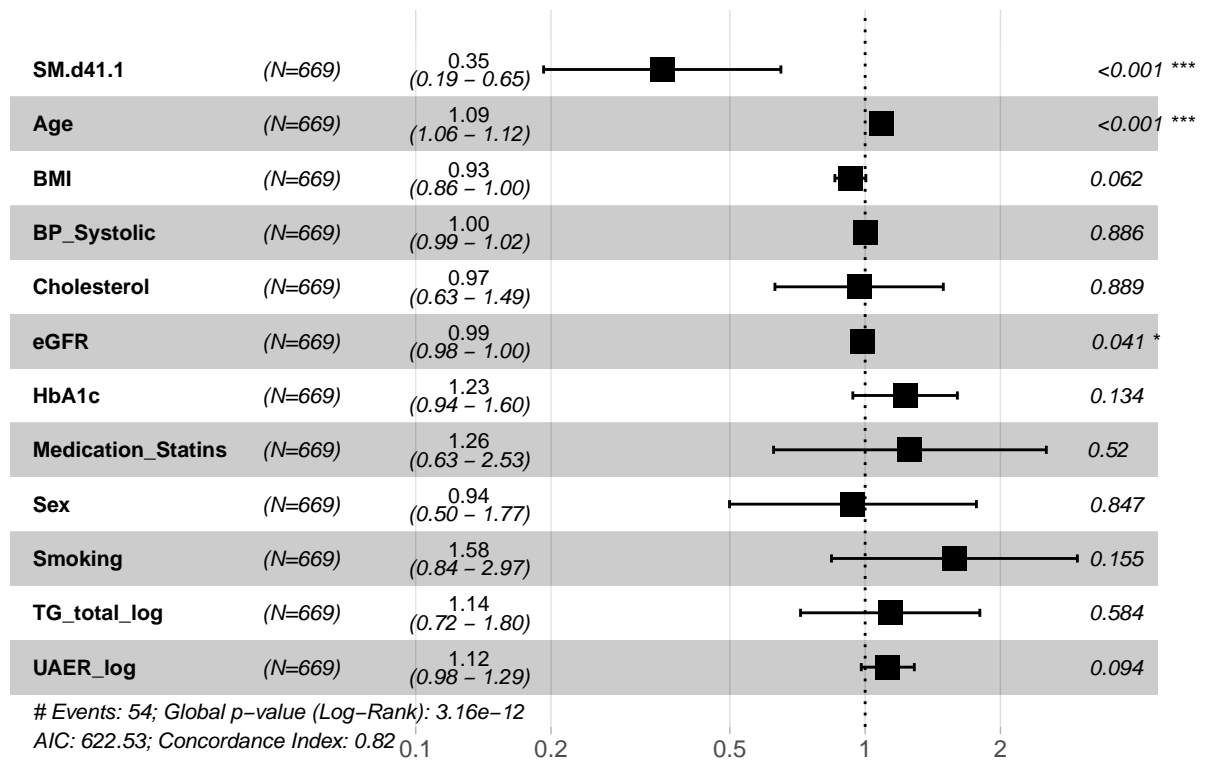

Figure 40: Forest plot of all the coefficients in the adjusted survival model for all-cause mortality. Shown in the figure are the name of the coefficient, number of observations (N), hazard ratio with 95 % confidence interval and the p-value of the association.

#### 5.1.1.1 Forest Plot with Clinical Variables

### 5.1.1.2 Diagnostics of the Survival Model

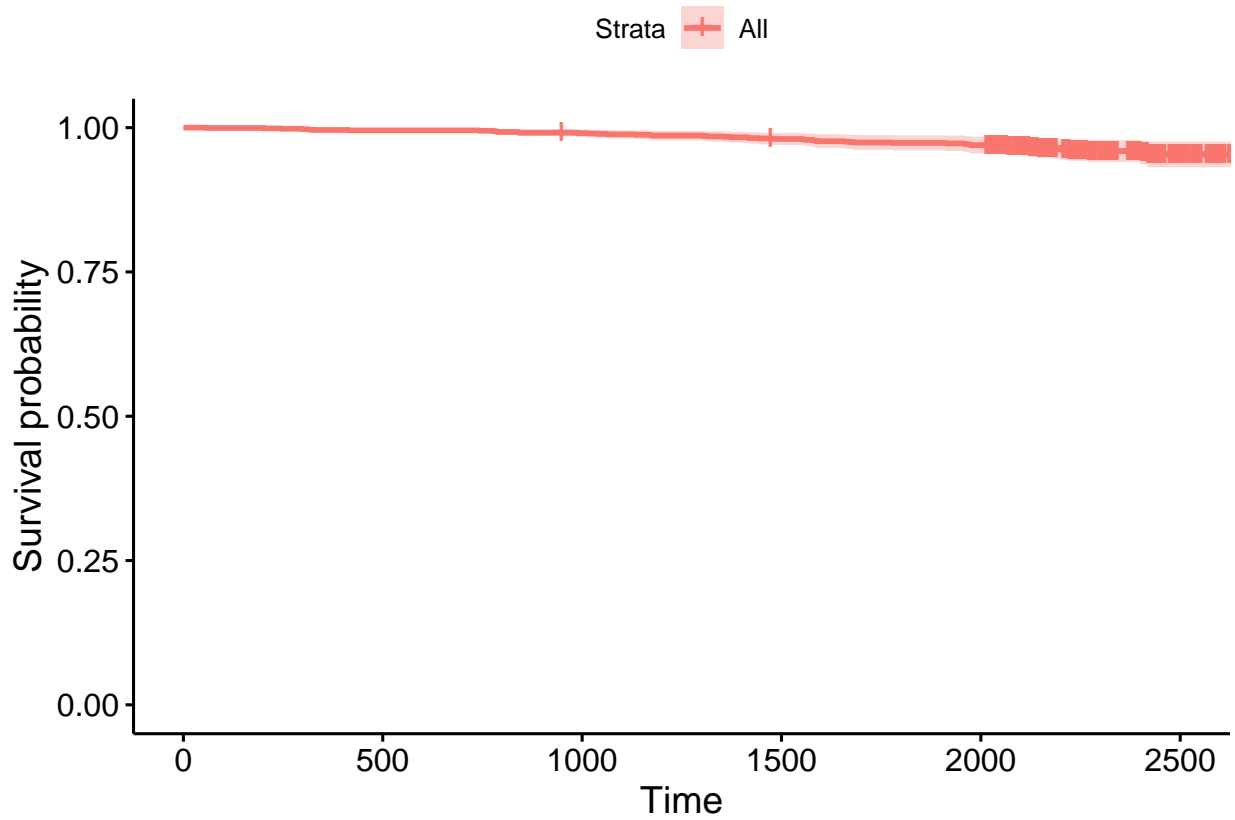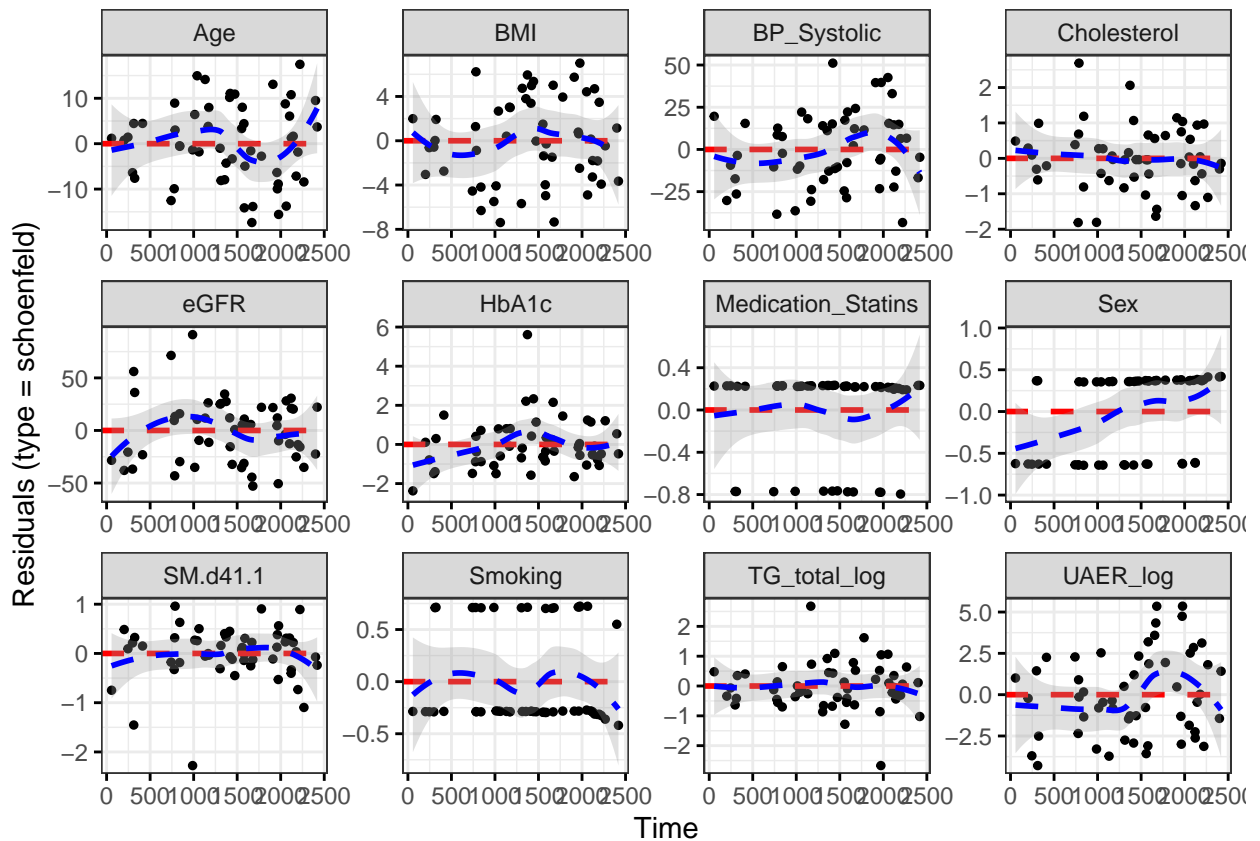

### 5.1.1.3 Kaplan-Maier Curve with Median Cutpoint

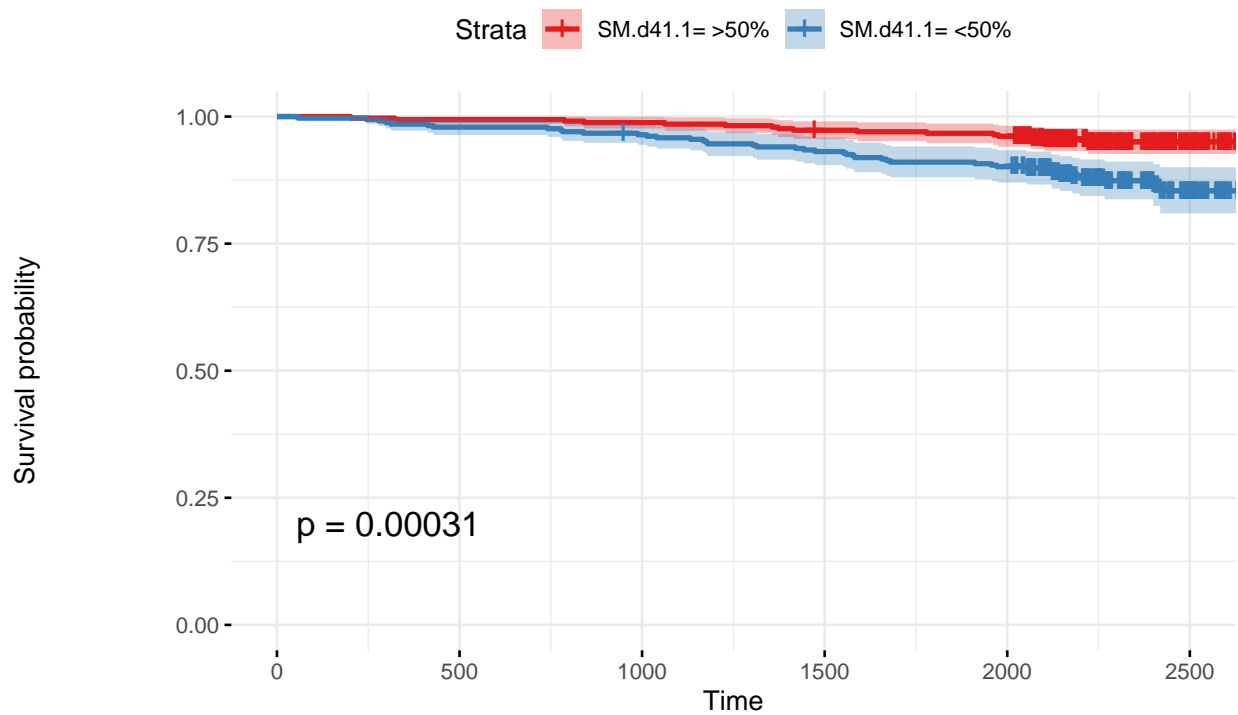

Number at risk

|                |     |     |     |     |     |    |
|----------------|-----|-----|-----|-----|-----|----|
| SM.d41.1= >50% | 334 | 332 | 330 | 324 | 320 | 64 |
| SM.d41.1= <50% | 335 | 328 | 322 | 311 | 301 | 45 |

Cumulative number of events

|                |   |   |    |    |    |    |
|----------------|---|---|----|----|----|----|
| SM.d41.1= >50% | 0 | 2 | 4  | 9  | 13 | 16 |
| SM.d41.1= <50% | 0 | 7 | 12 | 23 | 33 | 42 |

Figure 41: Kaplan-Meier figure of all-cause mortality in participants with lipid SM(41:1) above or below its median level (red and blue curves, respectively). Time of follow-up and survival probability, respectively, are shown on the x-axis and y-axis. Cumulative number of events and the number of remaining participants are shown for the two groups in the table below the figure.

## 5.1.2 Other Model Fits

```
## Call:
## survival::coxph(formula = survival::Surv(time = t_doeed_profil,
##     event = censor_doeed_profil.reversed.numeric) ~ SM.d41.1,
##     data = data.km)
##
##     n= 669, number of events= 58
##
##           coef exp(coef) se(coef)      z Pr(>|z|)
## SM.d41.1 <50% 1.0152    2.7598   0.2939 3.454 0.000552 ***
## ---
## Signif. codes:  0 '***' 0.001 '**' 0.01 '*' 0.05 '.' 0.1 ' ' 1
##
##           exp(coef) exp(-coef) lower .95 upper .95
## SM.d41.1 <50%      2.76      0.3623    1.551    4.91
##
## Concordance= 0.614 (se = 0.033 )
## Rsquare= 0.02 (max possible= 0.669 )
## Likelihood ratio test= 13.41 on 1 df,  p=0.0002508
## Wald test              = 11.93 on 1 df,  p=0.0005523
## Score (logrank) test = 12.99 on 1 df,  p=0.0003135
##
## Call:
## glm(formula = censor_doeed_profil.reversed.numeric ~ SM.d41.1 +
##     Age + BMI + BP_Systolic + Cholesterol + eGFR + HbA1c + Medication_Statins +
##     Sex + Smoking + TG_total_log + UAER_log, data = data.survival)
##
## Deviance Residuals:
##      Min       1Q   Median       3Q      Max
## -0.33989 -0.13218 -0.06706  0.00555  0.95561
##
## Coefficients:
##              Estimate Std. Error t value Pr(>|t|)
## (Intercept)    2.1089761  0.6464134   3.263 0.001166 **
## SM.d41.1      -0.1003398  0.0294002  -3.413 0.000686 ***
## Age           0.0047487  0.0010276   4.621 4.68e-06 ***
## BMI          -0.0055410  0.0029094  -1.904 0.057322 .
## BP_Systolic   0.0001645  0.0006808   0.242 0.809127
## Cholesterol  -0.0017448  0.0163895  -0.106 0.915254
## eGFR          -0.0008337  0.0004564  -1.827 0.068250 .
## HbA1c         0.0165920  0.0104610   1.586 0.113247
## Medication_Statins -0.0068740  0.0255750  -0.269 0.788192
## Sex           0.0081634  0.0233883   0.349 0.727183
## Smoking       0.0365555  0.0276219   1.323 0.186195
## TG_total_log  0.0072646  0.0182897   0.397 0.691362
## UAER_log      0.0101679  0.0057618   1.765 0.078119 .
## ---
## Signif. codes:  0 '***' 0.001 '**' 0.01 '*' 0.05 '.' 0.1 ' ' 1
##
## (Dispersion parameter for gaussian family taken to be 0.07223018)
##
##      Null deviance: 49.259 on 614 degrees of freedom
```

```

## Residual deviance: 43.483 on 602 degrees of freedom
## (54 observations deleted due to missingness)
## AIC: 144
##
## Number of Fisher Scoring iterations: 2
##
## Call:
## lm(formula = SM.d41.1 ~ censor_doed_profil.reversed.numeric +
##     Age + BMI + BP_Systolic + Cholesterol + eGFR + HbA1c + Medication_Statins +
##     Sex + Smoking + TG_total_log + UAER_log, data = data.survival)
##
## Residuals:
##      Min       1Q   Median       3Q      Max
## -2.36364 -0.19256  0.03596  0.22337  1.33335
##
## Coefficients:
##              Estimate Std. Error t value Pr(>|t|)
## (Intercept)      21.3632619   0.2087609  102.334 < 2e-16
## censor_doed_profil.reversed.numeric -0.1891707   0.0554282   -3.413 0.000686
## Age              -0.0030716   0.0014304   -2.147 0.032158
## BMI              -0.0021123   0.0040059   -0.527 0.598183
## BP_Systolic      -0.0002943   0.0009347   -0.315 0.752994
## Cholesterol       0.3023688   0.0188298   16.058 < 2e-16
## eGFR             -0.0006728   0.0006278   -1.072 0.284311
## HbA1c            0.0522571   0.0142351    3.671 0.000263
## Medication_Statins 0.0052398   0.0351176    0.149 0.881441
## Sex              -0.0754929   0.0319691   -2.361 0.018522
## Smoking          -0.0448977   0.0379376   -1.183 0.237093
## TG_total_log     -0.0260792   0.0250936   -1.039 0.299093
## UAER_log         -0.0238898   0.0078718   -3.035 0.002510
##
## (Intercept)          ***
## censor_doed_profil.reversed.numeric ***
## Age                  *
## BMI
## BP_Systolic
## Cholesterol          ***
## eGFR
## HbA1c                ***
## Medication_Statins
## Sex                  *
## Smoking
## TG_total_log
## UAER_log             **
## ---
## Signif. codes:  0 '***' 0.001 '**' 0.01 '*' 0.05 '.' 0.1 ' ' 1
##
## Residual standard error: 0.369 on 602 degrees of freedom
## (54 observations deleted due to missingness)
## Multiple R-squared:  0.3911, Adjusted R-squared:  0.379
## F-statistic: 32.23 on 12 and 602 DF, p-value: < 2.2e-16

```



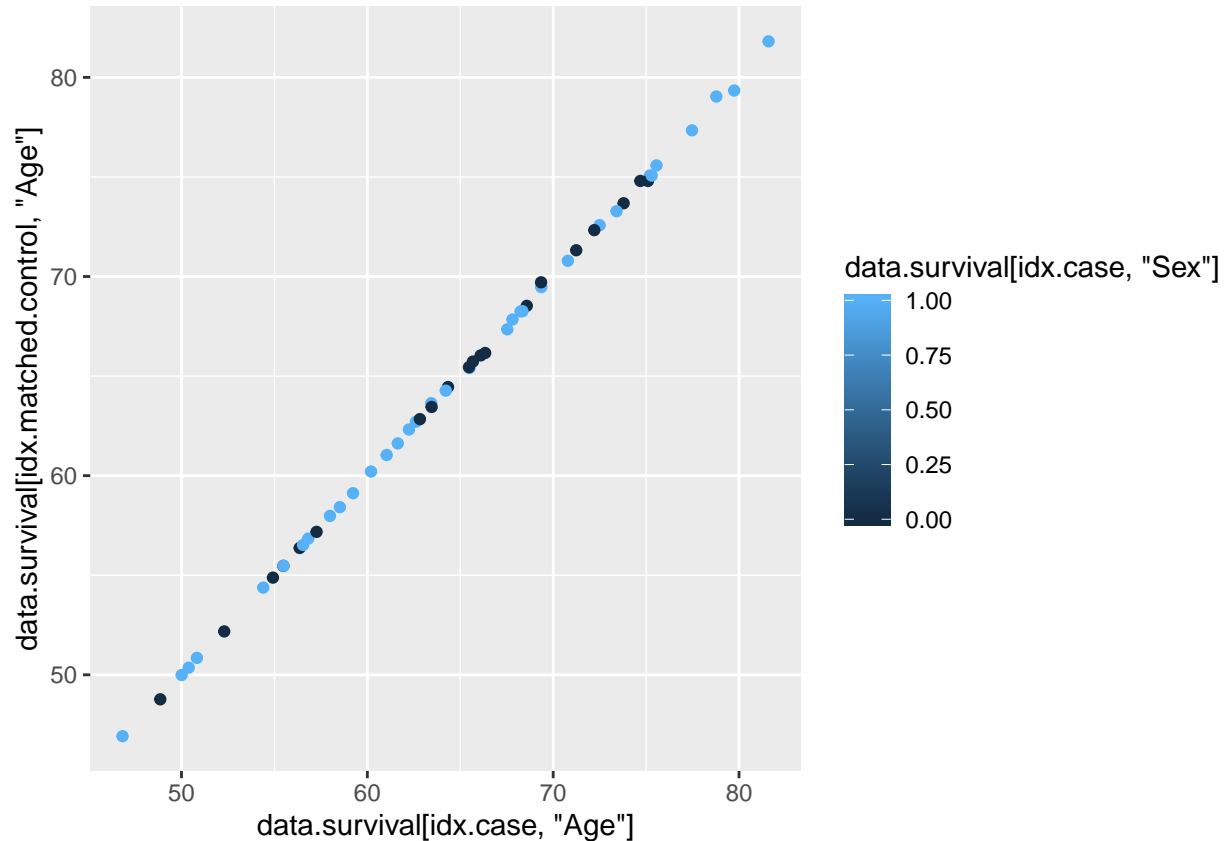

Figure 42: Quantile-quantile plot of the age of the sub-sampled cohort in persons with all-case mortality event (x-axis) and surviving persons without the event (y-axis). The two genders are shown in light and blue colors. Points falling on a diagonal line indicate a good age-matching in the two groups of the subcohort.

## 5.2 Step 5B: Analysis of an Age-and-Sex-Matched Subcohort

```
##
## Paired t-test
##
## data: data.survival[idx.case, "Age"] and data.survival[idx.matched.control, "Age"]
## t = 0.7071, df = 53, p-value = 0.4826
## alternative hypothesis: true difference in means is not equal to 0
## 95 percent confidence interval:
## -0.02278712 0.04760194
## sample estimates:
## mean of the differences
## 0.01240741
##
## Call:
## glm(formula = censor_doe_d_profil.reversed.numeric ~ SM.d41.1 +
## Age + BMI + BP_Systolic + Cholesterol + eGFR + HbA1c + Medication_Statins +
## Sex + Smoking + TG_total_log + UAER_log, data = data.survival.stratified)
##
## Deviance Residuals:
## Min 1Q Median 3Q Max
```

```

## -0.86519 -0.36291 -0.02769 0.34499 0.79471
##
## Coefficients:
##           Estimate Std. Error t value Pr(>|t|)
## (Intercept)      9.3731947  2.5000402   3.749 0.000305 ***
## SM.d41.1        -0.3877748  0.1146773  -3.381 0.001048 **
## Age              0.0007879  0.0057495   0.137 0.891288
## BMI             -0.0083531  0.0147462  -0.566 0.572416
## BP_Systolic     -0.0012972  0.0027038  -0.480 0.632491
## Cholesterol      0.0425939  0.0716868   0.594 0.553813
## eGFR            -0.0041364  0.0018327  -2.257 0.026302 *
## HbA1c           0.0168307  0.0432329   0.389 0.697923
## Medication_Statins 0.1714852  0.1157483   1.482 0.141773
## Sex             -0.0771974  0.1072989  -0.719 0.473623
## Smoking          0.1191930  0.1197801   0.995 0.322216
## TG_total_log     0.0135161  0.0726105   0.186 0.852727
## UAER_log         0.0181071  0.0234331   0.773 0.441610
## ---
## Signif. codes:  0 '***' 0.001 '**' 0.01 '*' 0.05 '.' 0.1 ' ' 1
##
## (Dispersion parameter for gaussian family taken to be 0.2133333)
##
## Null deviance: 27.000 on 107 degrees of freedom
## Residual deviance: 20.267 on 95 degrees of freedom
## AIC: 153.79
##
## Number of Fisher Scoring iterations: 2
##
## Call:
## lm(formula = SM.d41.1 ~ censor_doe_d_profil.reversed.numeric +
##     Age + BMI + BP_Systolic + Cholesterol + eGFR + HbA1c + Medication_Statins +
##     Sex + Smoking + TG_total_log + UAER_log, data = data.survival.stratified)
##
## Residuals:
##      Min       1Q   Median       3Q      Max
## -1.08663 -0.23451  0.00349  0.24801  0.80040
##
## Coefficients:
##           Estimate Std. Error t value Pr(>|t|)
## (Intercept)      21.2477338  0.6114086  34.752 < 2e-16
## censor_doe_d_profil.reversed.numeric -0.2770409  0.0819297  -3.381 0.00105
## Age              -0.0050528  0.0048325  -1.046 0.29841
## BMI             -0.0165859  0.0123686  -1.341 0.18313
## BP_Systolic      0.0002579  0.0022880   0.113 0.91051
## Cholesterol      0.3859975  0.0460084   8.390 4.51e-13
## eGFR            -0.0027896  0.0015641  -1.784 0.07770
## HbA1c           0.0863963  0.0354810   2.435 0.01676
## Medication_Statins 0.1604999  0.0975797   1.645 0.10331
## Sex             -0.1201282  0.0901014  -1.333 0.18564
## Smoking          -0.1916226  0.0998527  -1.919 0.05798
## TG_total_log     -0.0340404  0.0612853  -0.555 0.57990
## UAER_log         -0.0143670  0.0198141  -0.725 0.47018
##

```

```
## (Intercept) ***
## censor_doe_d_profil.reversed.numeric **
## Age
## BMI
## BP_Systolic
## Cholesterol ***
## eGFR .
## HbA1c *
## Medication_Statins
## Sex
## Smoking .
## TG_total_log
## UAER_log
## ---
## Signif. codes:  0 '***' 0.001 '**' 0.01 '*' 0.05 '.' 0.1 ' ' 1
##
## Residual standard error: 0.3904 on 95 degrees of freedom
## Multiple R-squared:  0.5687, Adjusted R-squared:  0.5142
## F-statistic: 10.44 on 12 and 95 DF,  p-value: 7.906e-13
```

### 5.2.1 Survival Model with Details

```
## Call:
## survival::coxph(formula = survival::Surv(time = t_doeed_profil,
##     event = censor_doeed_profil.reversed.numeric) ~ SM.d41.1 +
##     Age + BMI + BP_Systolic + Cholesterol + eGFR + HbA1c + Medication_Statins +
##     Sex + Smoking + TG_total_log + UAER_log, data = data.survival.stratified)
##
## n= 108, number of events= 54
##
##              coef exp(coef) se(coef)      z Pr(>|z|)
## SM.d41.1      -1.245927  0.287674  0.373723 -3.334 0.000857 ***
## Age           0.012702  1.012783  0.018732  0.678 0.497708
## BMI           0.002475  1.002478  0.046936  0.053 0.957949
## BP_Systolic   -0.012498  0.987580  0.008782 -1.423 0.154694
## Cholesterol    0.192726  1.212551  0.255306  0.755 0.450319
## eGFR          -0.009692  0.990355  0.005628 -1.722 0.085052 .
## HbA1c         -0.038030  0.962684  0.147448 -0.258 0.796469
## Medication_Statins 0.844130  2.325953  0.413480  2.042 0.041199 *
## Sex          -0.655899  0.518975  0.361692 -1.813 0.069768 .
## Smoking       0.480851  1.617450  0.329439  1.460 0.144399
## TG_total_log  0.077683  1.080780  0.216428  0.359 0.719646
## UAER_log      0.055642  1.057219  0.070568  0.788 0.430408
## ---
## Signif. codes:  0 '***' 0.001 '**' 0.01 '*' 0.05 '.' 0.1 ' ' 1
##
##              exp(coef) exp(-coef) lower .95 upper .95
## SM.d41.1          0.2877    3.4762    0.1383    0.5984
## Age               1.0128    0.9874    0.9763    1.0507
## BMI               1.0025    0.9975    0.9144    1.0991
## BP_Systolic       0.9876    1.0126    0.9707    1.0047
## Cholesterol       1.2126    0.8247    0.7352    1.9999
## eGFR              0.9904    1.0097    0.9795    1.0013
## HbA1c             0.9627    1.0388    0.7211    1.2853
## Medication_Statins 2.3260    0.4299    1.0343    5.2307
## Sex               0.5190    1.9269    0.2554    1.0544
## Smoking           1.6174    0.6183    0.8480    3.0850
## TG_total_log     1.0808    0.9253    0.7072    1.6518
## UAER_log         1.0572    0.9459    0.9207    1.2140
##
## Concordance= 0.697 (se = 0.041 )
## Rsquare= 0.232 (max possible= 0.986 )
## Likelihood ratio test= 28.45 on 12 df, p=0.004748
## Wald test = 27.6 on 12 df, p=0.006318
## Score (logrank) test = 29.31 on 12 df, p=0.00354
```

### Hazard Ratios for All-Cause Mortality

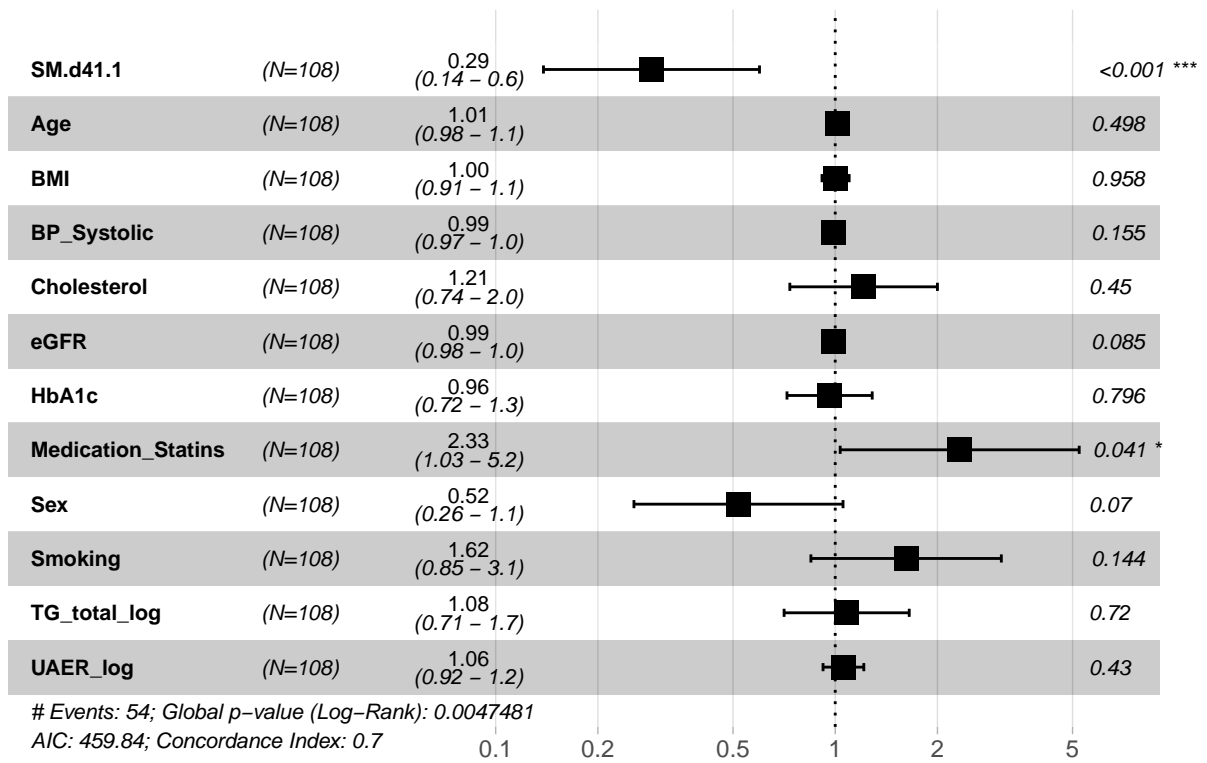

Figure 43: Forest plot of all the coefficients in the adjusted survival model for all-cause mortality. Shown in the figure are the name of the coefficient, number of observations (N), hazard ratio with 95 % confidence interval and the p-value of the association.

#### 5.2.1.1 Forest Plot with Clinical Variables

### 5.2.1.2 Diagnostics of the Survival Model

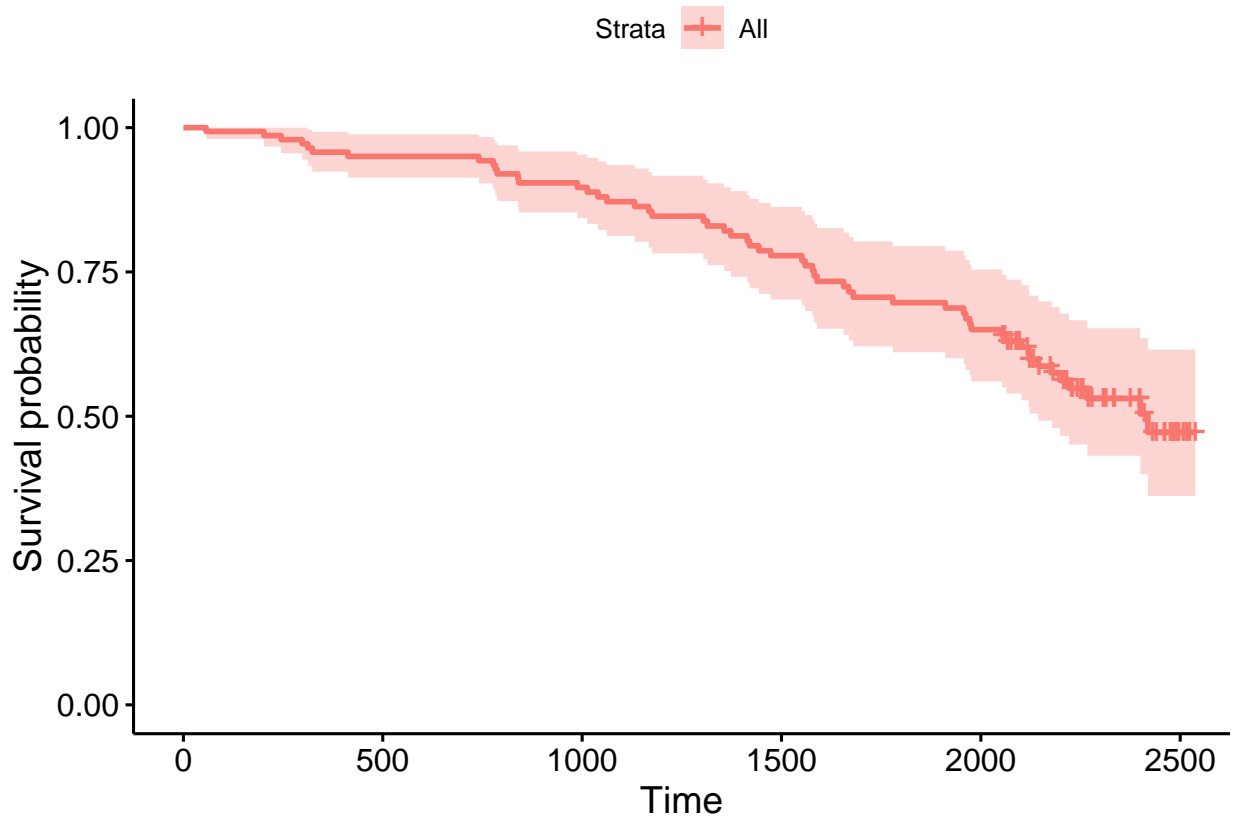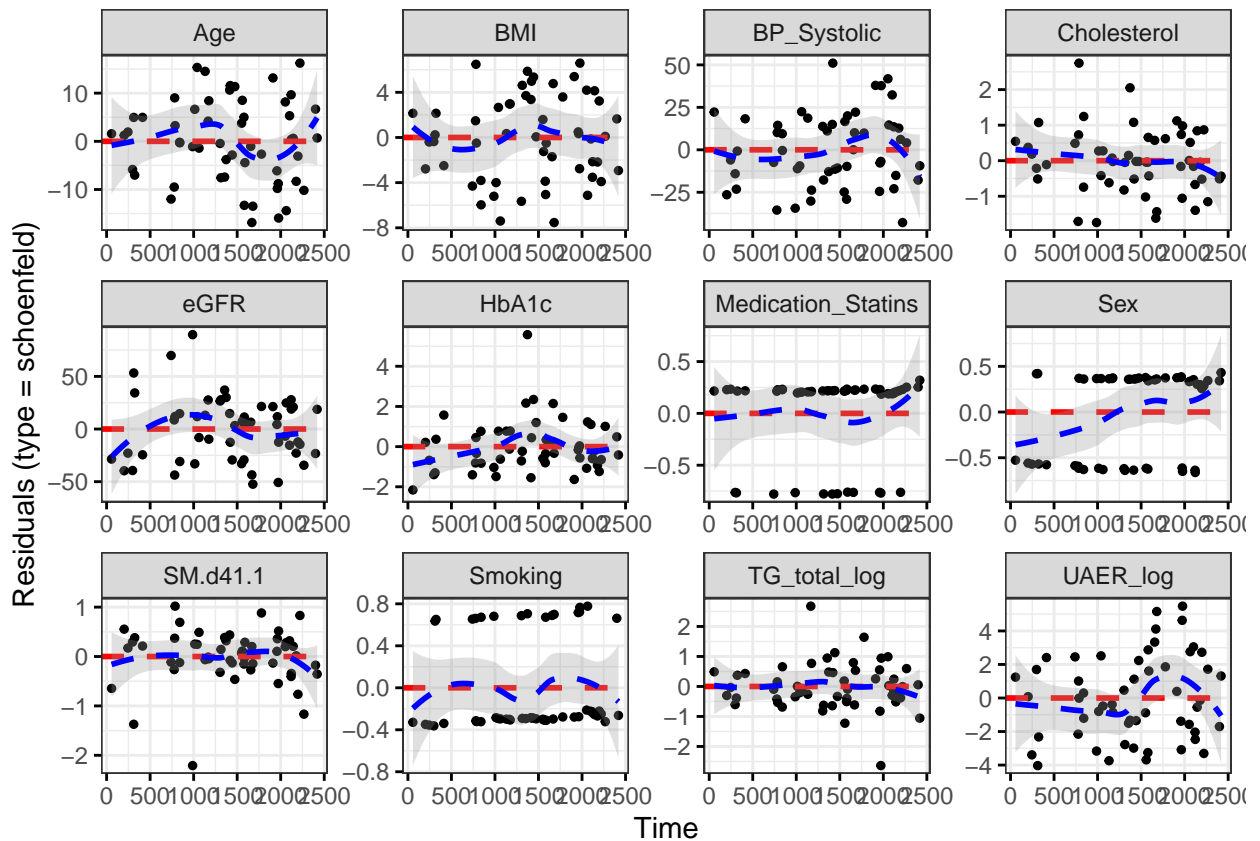

### 5.2.1.3 Kaplan-Maier Curve with Median Cutpoint



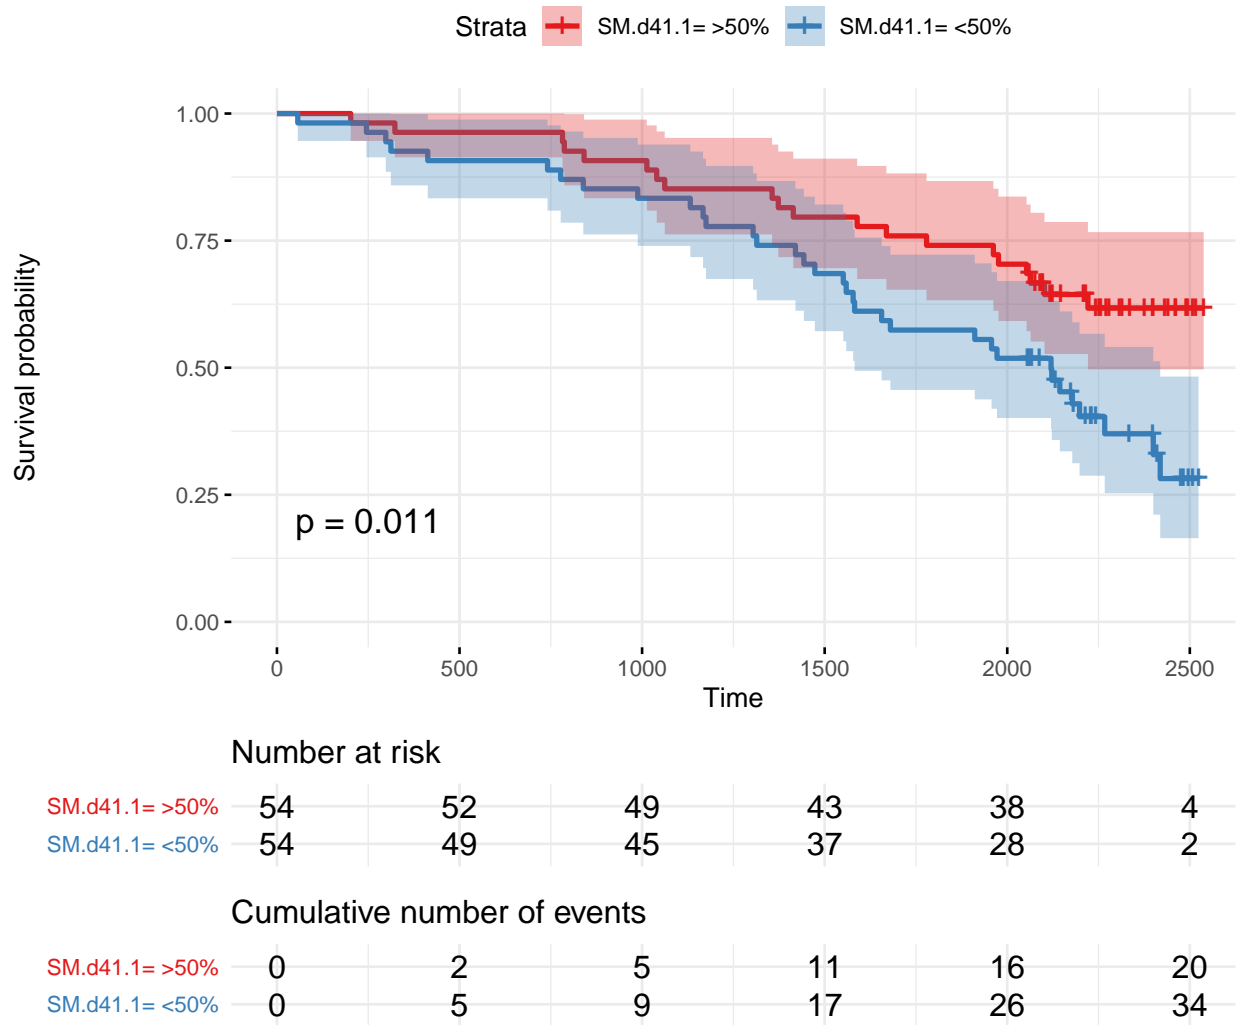

Figure 44: Kaplan-Meier figure of all-cause mortality in participants with lipid SM(41:1) above or below its median level (red and blue curves, respectively). Time of follow-up and survival probability, respectively, are shown on the x-axis and y-axis. Cumulative number of events and the number of remaining participants are shown for the two groups in the table below the figure.

## 5.2.2 Other Model Fits

```
## Call:
## survival::coxph(formula = survival::Surv(time = t_doe_d_profil,
##     event = censor_doe_d_profil.reversed.numeric) ~ SM.d41.1,
##     data = data.km)
##
##     n= 108, number of events= 54
##
##           coef exp(coef) se(coef)      z Pr(>|z|)
## SM.d41.1 <50% 0.7078      2.0296   0.2824 2.506   0.0122 *
## ---
## Signif. codes:  0 '***' 0.001 '**' 0.01 '*' 0.05 '.' 0.1 ' ' 1
##
##           exp(coef) exp(-coef) lower .95 upper .95
## SM.d41.1 <50%      2.03      0.4927   1.167   3.53
##
## Concordance= 0.577 (se = 0.036 )
## Rsquare= 0.059 (max possible= 0.986 )
## Likelihood ratio test= 6.55 on 1 df,  p=0.01051
## Wald test              = 6.28 on 1 df,  p=0.01219
## Score (logrank) test = 6.55 on 1 df,  p=0.01051
##
## Call:
## glm(formula = censor_doe_d_profil.reversed.numeric ~ SM.d41.1 +
##     Age + BMI + BP_Systolic + Cholesterol + eGFR + HbA1c + Medication_Statins +
##     Sex + Smoking + TG_total_log + UAER_log, data = data.survival.stratified)
##
## Deviance Residuals:
##      Min       1Q   Median       3Q      Max
## -0.86519 -0.36291 -0.02769  0.34499  0.79471
##
## Coefficients:
##              Estimate Std. Error t value Pr(>|t|)
## (Intercept)    9.3731947  2.5000402   3.749 0.000305 ***
## SM.d41.1      -0.3877748  0.1146773  -3.381 0.001048 **
## Age            0.0007879  0.0057495   0.137 0.891288
## BMI           -0.0083531  0.0147462  -0.566 0.572416
## BP_Systolic   -0.0012972  0.0027038  -0.480 0.632491
## Cholesterol    0.0425939  0.0716868   0.594 0.553813
## eGFR          -0.0041364  0.0018327  -2.257 0.026302 *
## HbA1c         0.0168307  0.0432329   0.389 0.697923
## Medication_Statins 0.1714852  0.1157483   1.482 0.141773
## Sex           -0.0771974  0.1072989  -0.719 0.473623
## Smoking        0.1191930  0.1197801   0.995 0.322216
## TG_total_log   0.0135161  0.0726105   0.186 0.852727
## UAER_log       0.0181071  0.0234331   0.773 0.441610
## ---
## Signif. codes:  0 '***' 0.001 '**' 0.01 '*' 0.05 '.' 0.1 ' ' 1
##
## (Dispersion parameter for gaussian family taken to be 0.2133333)
##
##      Null deviance: 27.000 on 107 degrees of freedom
```

```

## Residual deviance: 20.267 on 95 degrees of freedom
## AIC: 153.79
##
## Number of Fisher Scoring iterations: 2
##
## Call:
## lm(formula = SM.d41.1 ~ censor_doed_profil.reversed.numeric +
##     Age + BMI + BP_Systolic + Cholesterol + eGFR + HbA1c + Medication_Statins +
##     Sex + Smoking + TG_total_log + UAER_log, data = data.survival.stratified)
##
## Residuals:
##      Min       1Q   Median       3Q      Max
## -1.08663 -0.23451  0.00349  0.24801  0.80040
##
## Coefficients:
##              Estimate Std. Error t value Pr(>|t|)
## (Intercept)      21.2477338   0.6114086   34.752 < 2e-16
## censor_doed_profil.reversed.numeric -0.2770409   0.0819297   -3.381  0.00105
## Age              -0.0050528   0.0048325   -1.046  0.29841
## BMI              -0.0165859   0.0123686   -1.341  0.18313
## BP_Systolic       0.0002579   0.0022880    0.113  0.91051
## Cholesterol       0.3859975   0.0460084    8.390 4.51e-13
## eGFR             -0.0027896   0.0015641   -1.784  0.07770
## HbA1c            0.0863963   0.0354810    2.435  0.01676
## Medication_Statins 0.1604999   0.0975797    1.645  0.10331
## Sex             -0.1201282   0.0901014   -1.333  0.18564
## Smoking          -0.1916226   0.0998527   -1.919  0.05798
## TG_total_log     -0.0340404   0.0612853   -0.555  0.57990
## UAER_log        -0.0143670   0.0198141   -0.725  0.47018
##
## (Intercept)          ***
## censor_doed_profil.reversed.numeric **
## Age
## BMI
## BP_Systolic
## Cholesterol          ***
## eGFR                 .
## HbA1c                *
## Medication_Statins
## Sex
## Smoking              .
## TG_total_log
## UAER_log
## ---
## Signif. codes:  0 '***' 0.001 '**' 0.01 '*' 0.05 '.' 0.1 ' ' 1
##
## Residual standard error: 0.3904 on 95 degrees of freedom
## Multiple R-squared:  0.5687, Adjusted R-squared:  0.5142
## F-statistic: 10.44 on 12 and 95 DF, p-value: 7.906e-13

```

## 6 Correlation Matrix

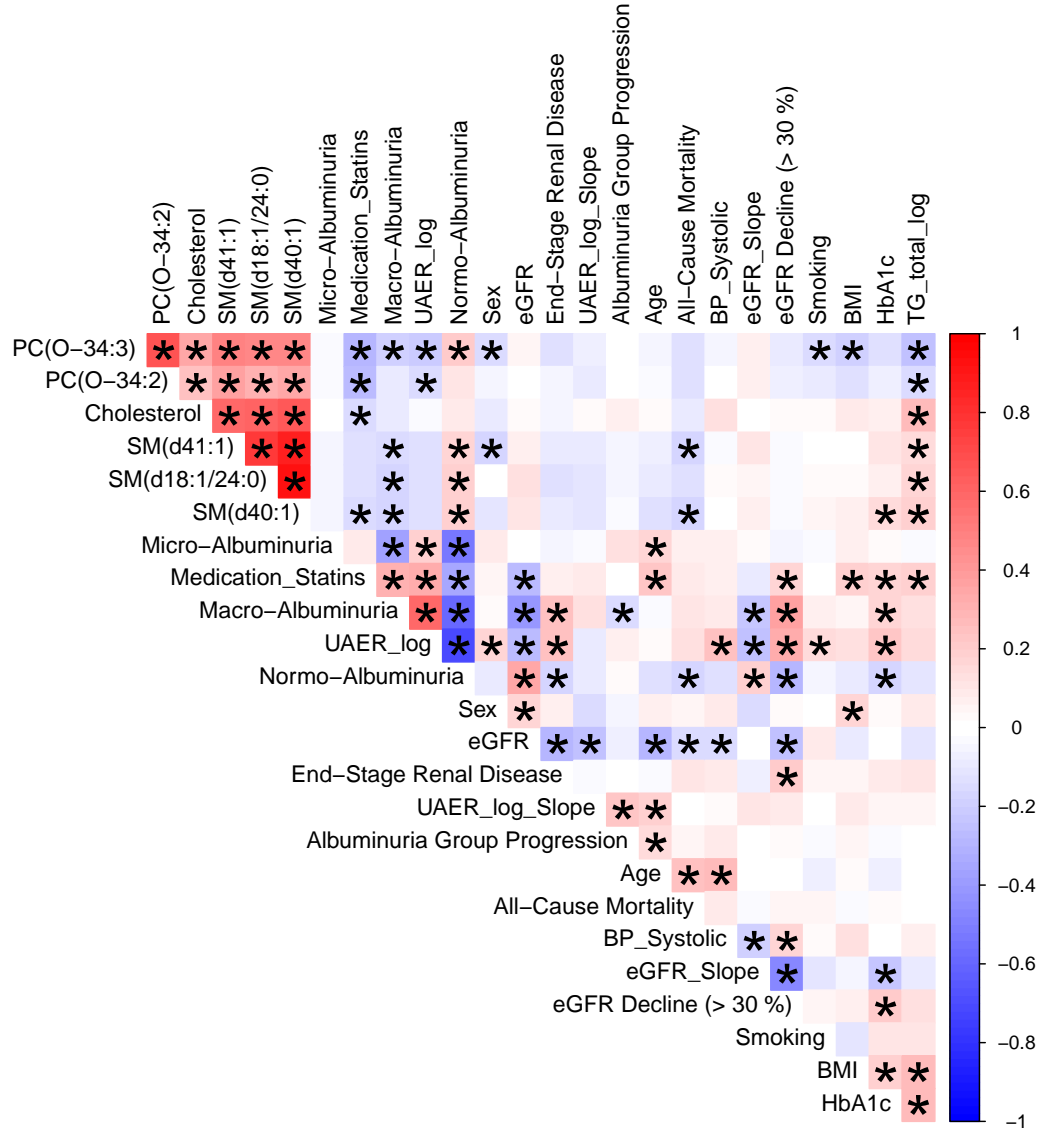

Figure 45: Correlation matrix of relevant variables. Variables are shown on the rows and columns. Spearman correlation of two variables is shown as the color of the square at the intersection of the row and column that corresponds to the two variables. Blue, red and white, respectively, indicate inverse, positive and no correlation. Correlations with statistical significance at  $p < 0.05$  after correction for multiple testing are labeled with asterisk.

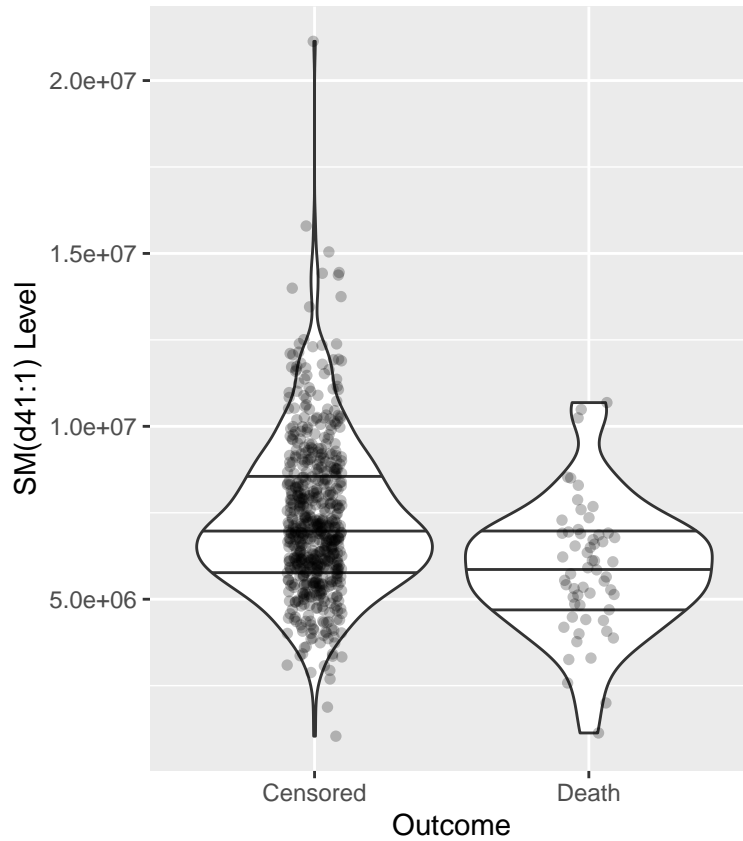

Figure 46: Violin plot of observations of the level of the lipid SM(d41:1). Subpopulations of the study are shown on the x-axis and the level of the lipid is shown on the y-axis. The density of the observations is shown in the shape of the violin and the quantiles of the distribution are shown as horizontal lines.

## 7 Boxplots

### 7.1 Entire Cohort

```
## [1] ""
## [1] ""
## [1] ""
## [1] ""
## `geom_smooth()` using method = 'loess' and formula 'y ~ x'
```

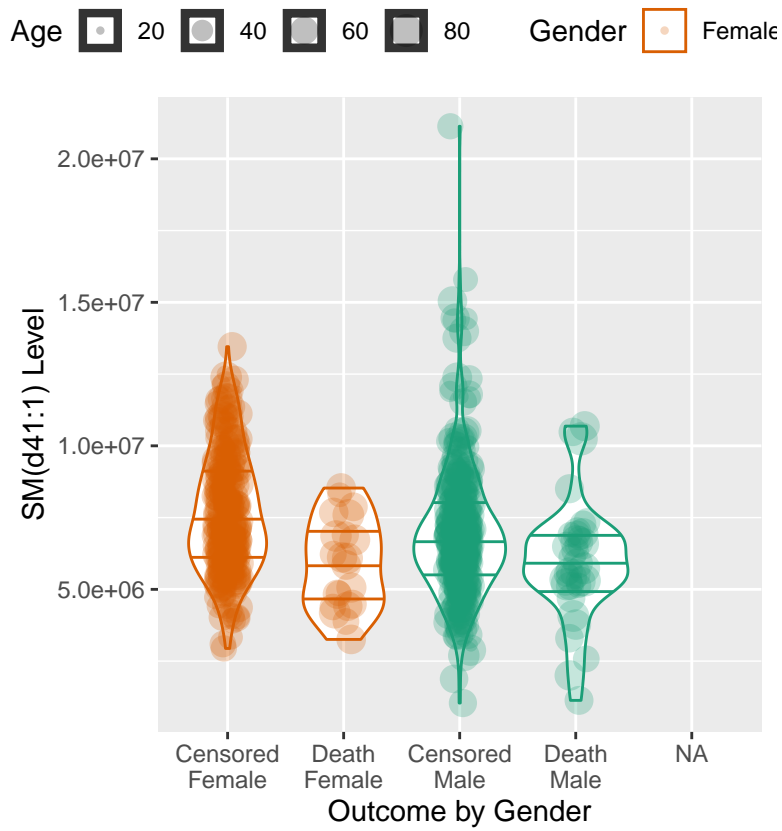

Figure 47: Violin plot of observations of the level of the lipid SM(d41:1). Subpopulations of the study are shown on the x-axis and the level of the lipid is shown on the y-axis. The density of the observations is shown in the shape of the violin and the quantiles of the distribution are shown as horizontal lines.

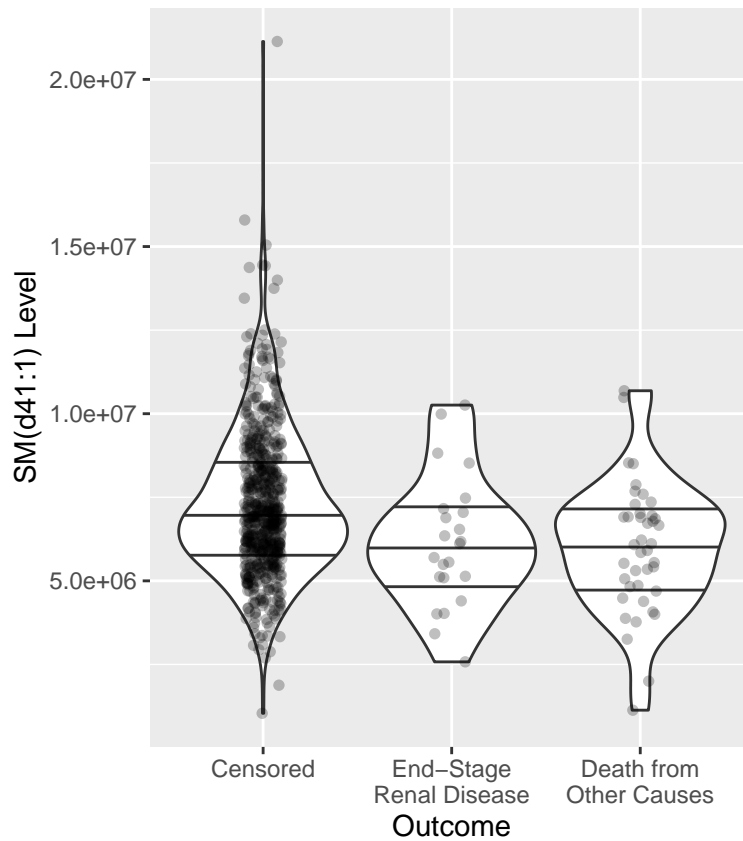

Figure 48: Violin plot of observations of the level of the lipid SM(d41:1). Subpopulations of the study are shown on the x-axis and the level of the lipid is shown on the y-axis. The density of the observations is shown in the shape of the violin and the quantiles of the distribution are shown as horizontal lines.



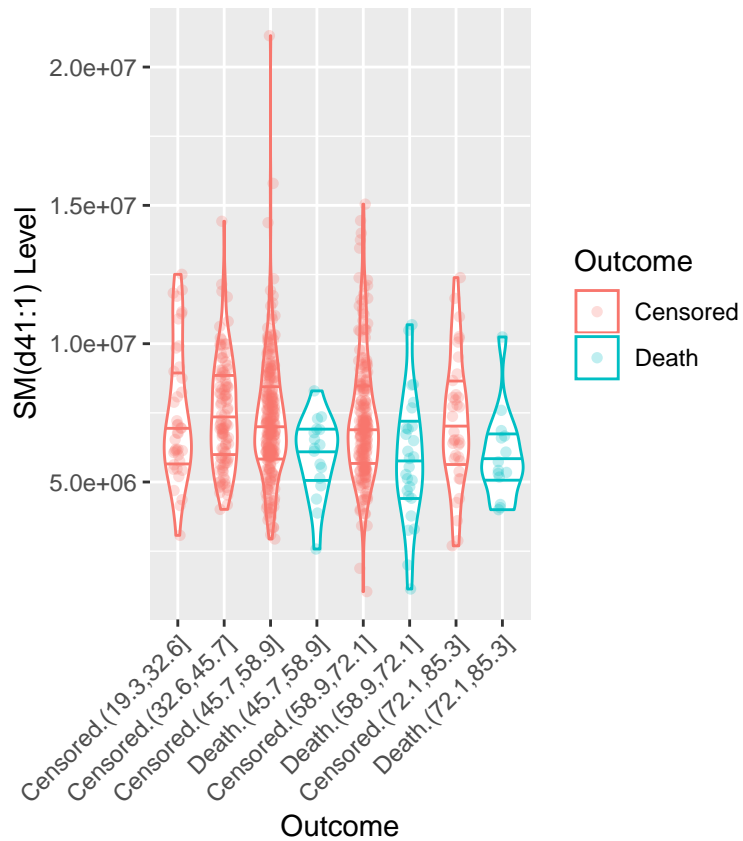

Figure 49: Violin plot of observations of the level of the lipid SM(d41:1). Subpopulations of the study are shown on the x-axis and the level of the lipid is shown on the y-axis. The density of the observations is shown in the shape of the violin and the quantiles of the distribution are shown as horizontal lines.

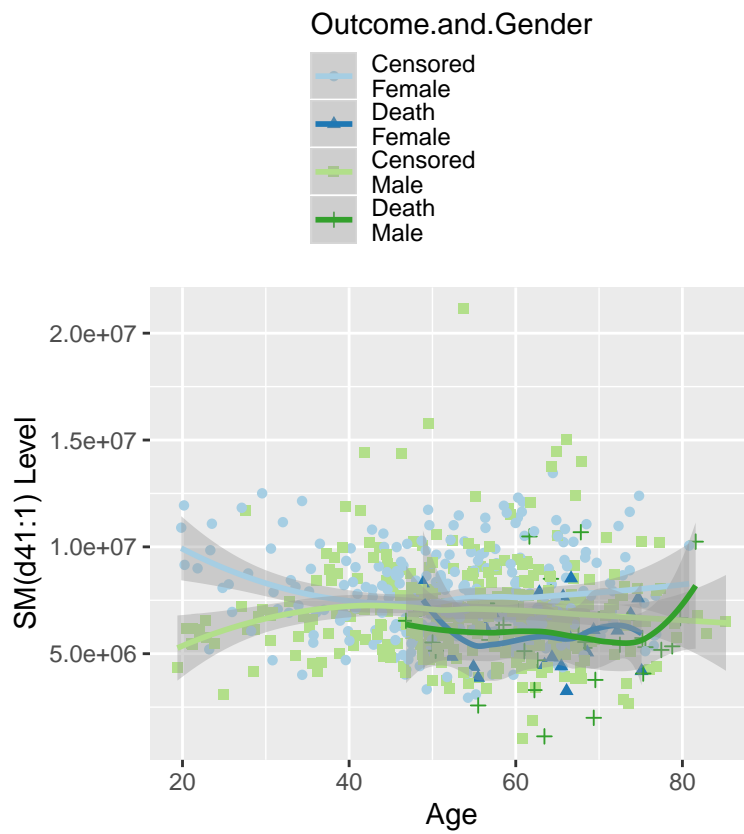

Figure 50: Observations of the level of the lipid SM(d41:1) against age. Subpopulations of the study are in different color. Possible trend in the observations is shown with a subgroup-specific nonlinear regression with the LOESS model.

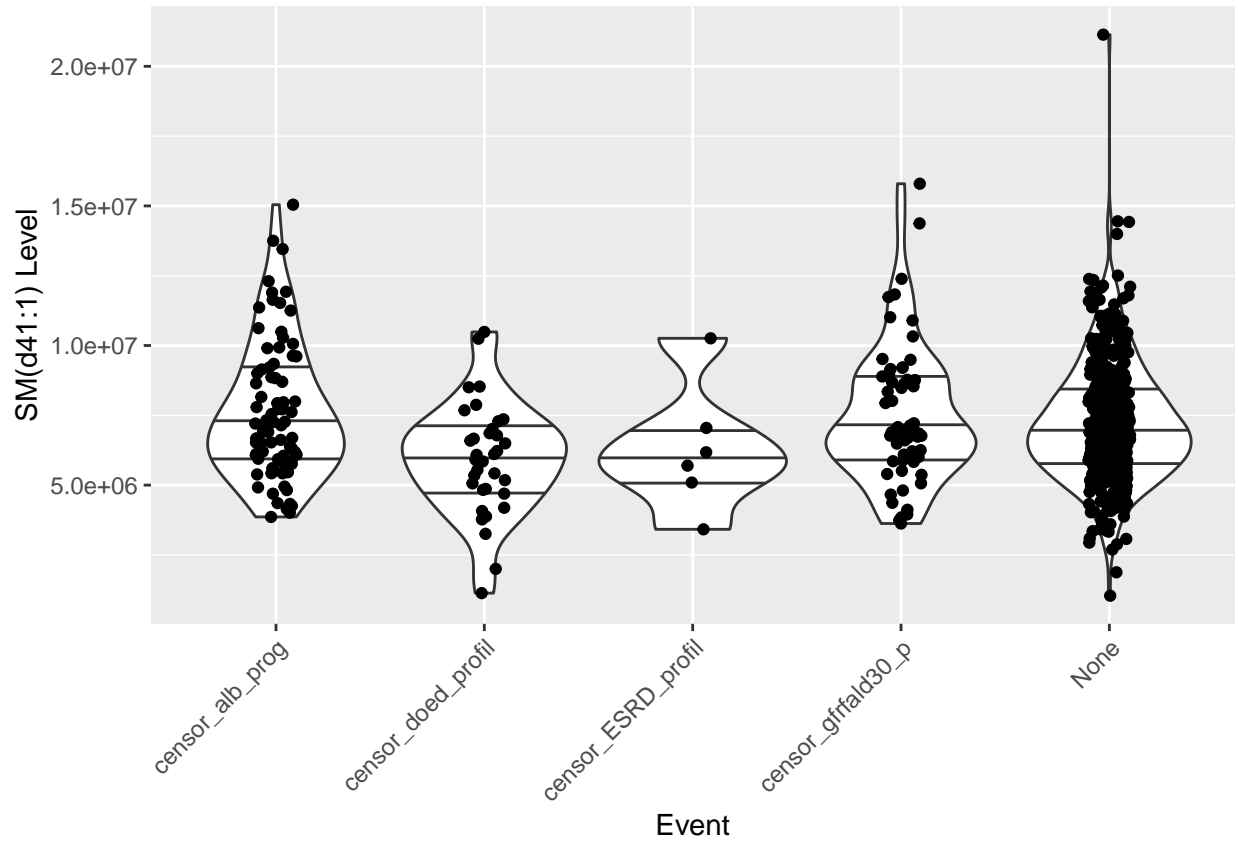

Figure 51: Violin plot of observations of the level of the lipid SM(d41:1). Subpopulations of the study are shown on the x-axis and the level of the lipid is shown on the y-axis. The density of the observations is shown in the shape of the violin and the quantiles of the distribution are shown as horizontal lines.

## 7.2 Age-and-Sex-Matched Subcohort

```
## [1] ""
## [1] ""
## [1] ""
## [1] ""
```

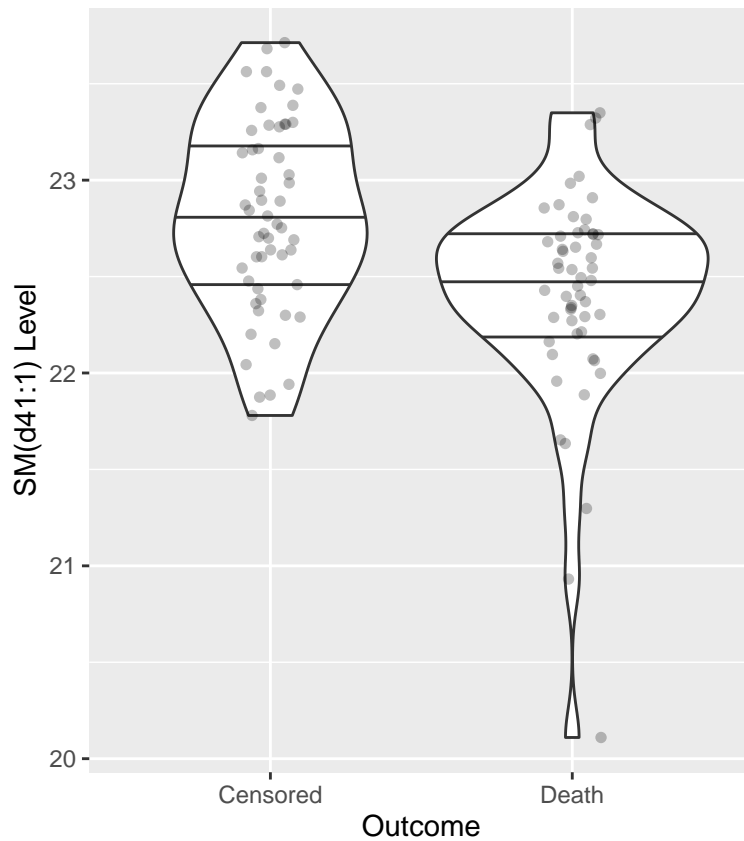

Figure 52: Violin plot of observations of the level of the lipid SM(d41:1). Subpopulations of the study are shown on the x-axis and the level of the lipid is shown on the y-axis. The density of the observations is shown in the shape of the violin and the quantiles of the distribution are shown as horizontal lines.

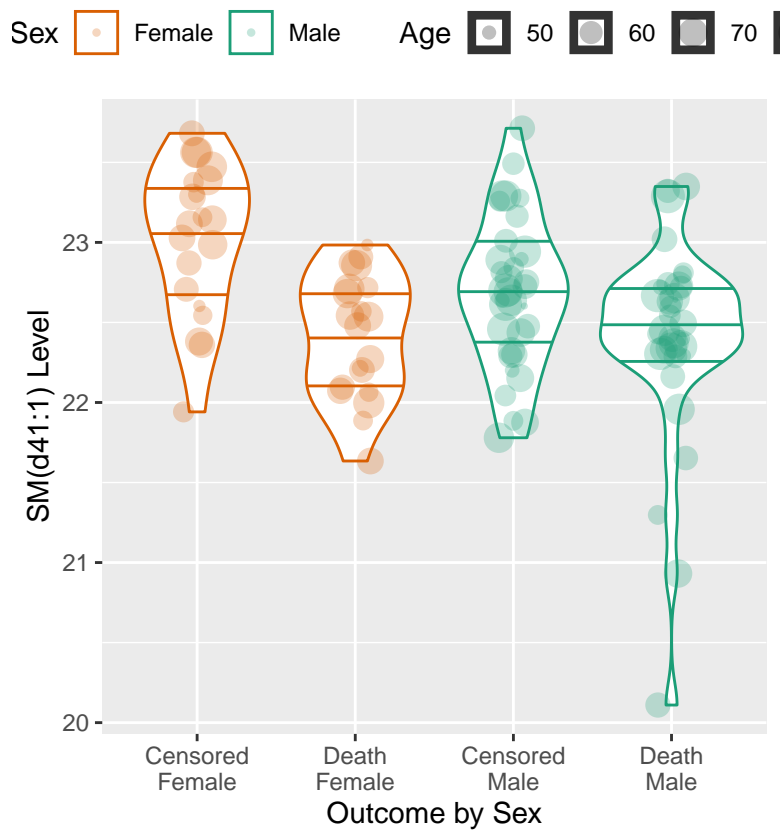

Figure 53: Violin plot of observations of the level of the lipid SM(d41:1). Subpopulations of the study are shown on the x-axis and the level of the lipid is shown on the y-axis. The density of the observations is shown in the shape of the violin and the quantiles of the distribution are shown as horizontal lines.

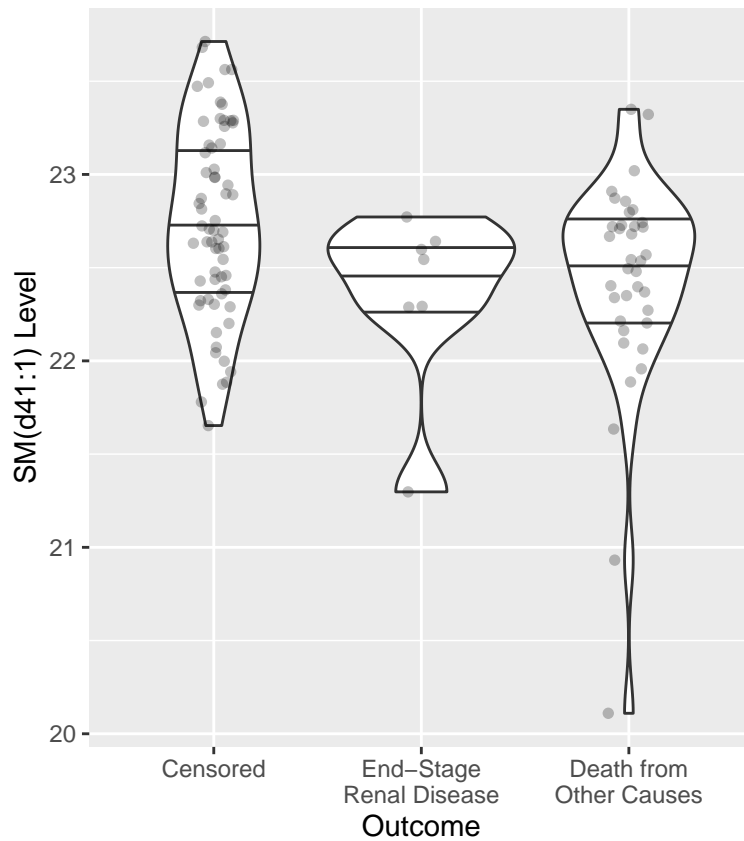

Figure 54: Violin plot of observations of the level of the lipid SM(d41:1). Subpopulations of the study are shown on the x-axis and the level of the lipid is shown on the y-axis. The density of the observations is shown in the shape of the violin and the quantiles of the distribution are shown as horizontal lines.

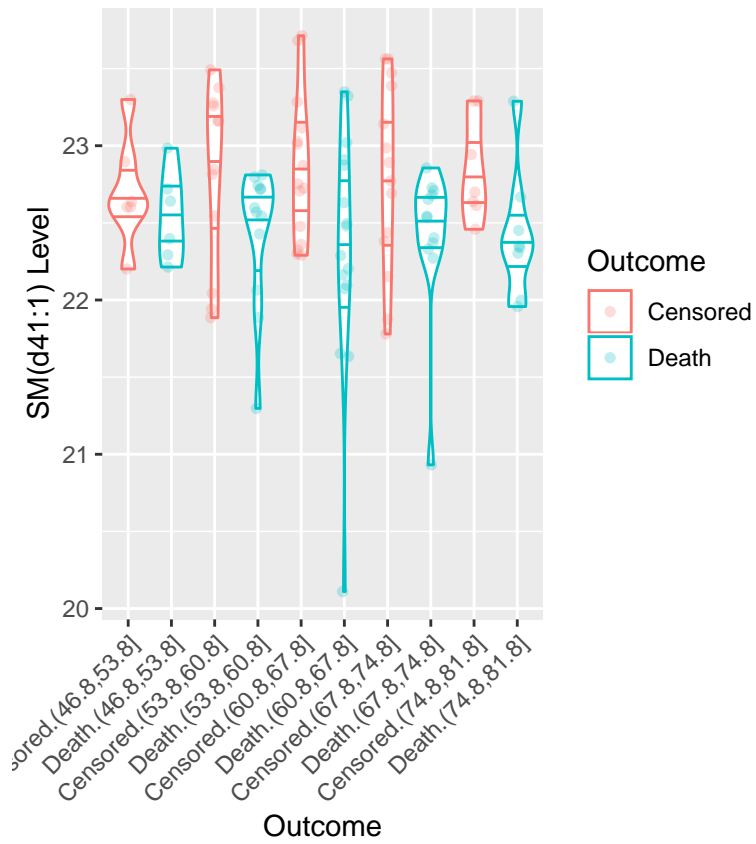

Figure 55: Violin plot of observations of the level of the lipid SM(d41:1). Subpopulations of the study are shown on the x-axis and the level of the lipid is shown on the y-axis. The density of the observations is shown in the shape of the violin and the quantiles of the distribution are shown as horizontal lines.

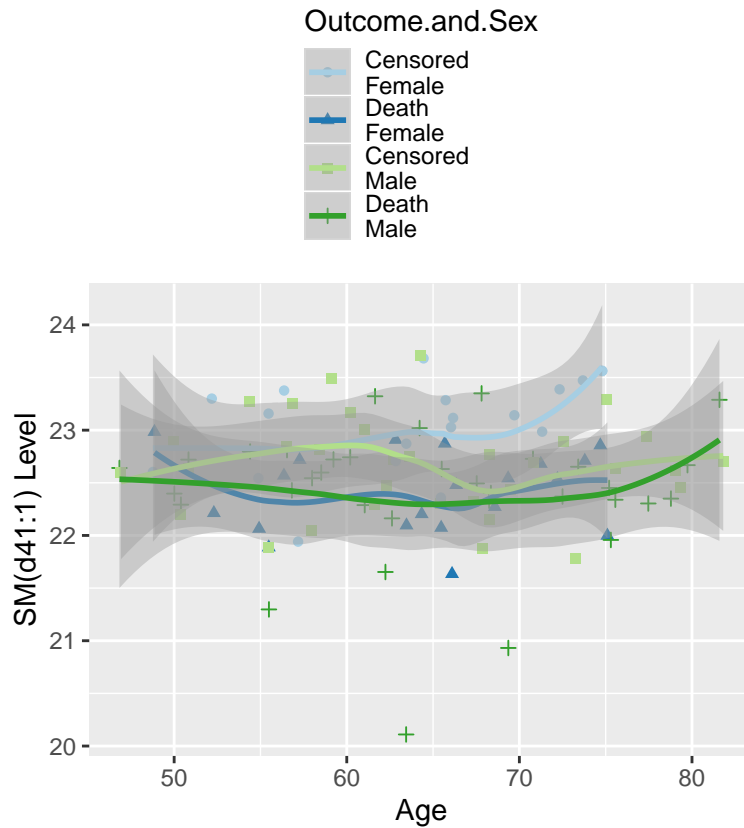

Figure 56: Observations of the level of the lipid SM(d41:1) against age. Subpopulations of the study are in different color. Possible trend in the observations is shown with a subgroup-specific nonlinear regression with the LOESS model.

```
## `geom_smooth()` using method = 'loess' and formula 'y ~ x'
```



## 8 Lipids' Proportion of the Total Amount of Lipid Class

```
##
##
## Table: List of lipids in the class LPC
## and the lipid's respective proportion of observed signal within the class.
## Shown are each lipid's rank (Rank),
## name (Name),
## class (Class) and
## proportion of the lipid in its class (Pcnt.of.Class; %).
##
## Rank Name          Class  Pcnt.of.Class
## -----
##      1 LPC(16:0)    LPC     47
##      2 LPC(18:0)    LPC     20
##      3 LPC(18:2)    LPC     16
##      4 LPC(18:1)    LPC     13
##      5 LPC(20:4)    LPC     2.9
##      6 LPC(16:1)    LPC     1.2
##
##
## Table: List of lipids in the class PC
## and the lipid's respective proportion of observed signal within the class.
## Shown are each lipid's rank (Rank),
## name (Name),
## class (Class) and
## proportion of the lipid in its class (Pcnt.of.Class; %).
##
## Rank Name          Class  Pcnt.of.Class
## -----
##      1 PC(34:2)     PC     13
##      2 PC(36:2)     PC     13
##      3 PC(36:4)     PC     12
##      4 PC(34:1)     PC     12
##      5 PC(36:3)     PC     10
##      6 PC(38:6)     PC     8.2
##      7 PC(38:4)     PC     7.3
##      8 PC(38:5)     PC     4.3
##      9 PC(36:5)     PC     4.1
##     10 PC(38:3)     PC     4
##     11 PC(40:6)     PC     3.5
##     12 PC(32:1)     PC     2.1
##     13 PC(34:3)     PC     1.2
##     14 PC(32:0)     PC     1
##     15 PC(40:5)     PC     0.85
##     16 PC(35:2)     PC     0.69
##     17 PC(35:1)     PC     0.66
##     18 PC(40:7)     PC     0.5
##     19 PC(38:2)     PC     0.48
##     20 PC(32:2)     PC     0.43
##     21 PC(33:1)     PC     0.37
##     22 PC(37:2)     PC     0.13
##
##
```

```

## Table: List of lipids in the class PC-0/P
## and the lipid's respective proportion of observed signal within the class.
## Shown are each lipid's rank (Rank),
## name (Name),
## class (Class) and
## proportion of the lipid in its class (Pcnt.of.Class; %).

```

```

##
## Rank Name Class Pcnt.of.Class
## -----
## 1 PC(0-36:4) PC-0/P 22
## 2 PC(0-38:5) PC-0/P 19
## 3 PC(0-36:5) PC-0/P 16
## 4 PC(0-34:3) PC-0/P 12
## 5 PC(0-38:4) PC-0/P 10
## 6 PC(0-34:2) PC-0/P 9.1
## 7 PC(0-36:2) PC-0/P 4
## 8 PC(0-38:6) PC-0/P 3.9
## 9 PC(0-36:3) PC-0/P 3.8

```

```

##
##
## Table: List of lipids in the class SM
## and the lipid's respective proportion of observed signal within the class.
## Shown are each lipid's rank (Rank),
## name (Name),
## class (Class) and
## proportion of the lipid in its class (Pcnt.of.Class; %).

```

```

##
## Rank Name Class Pcnt.of.Class
## -----
## 1 SM(42:2) SM 20
## 2 SM(d34:1) SM 16
## 3 SM(d40:1) SM 9.6
## 4 SM(d18:2/24:1) SM 8.6
## 5 SM(d40:2) SM 7.6
## 6 SM(d18:1/24:0) SM 7.3
## 7 SM(d36:1) SM 6
## 8 SM(d38:1) SM 5.3
## 9 SM(d41:1) SM 4.3
## 10 SM(d16:1/18:1) SM 3.7
## 11 SM(d41:2) SM 3.3
## 12 SM(d32:1) SM 2.7
## 13 SM(d36:2) SM 1.5
## 14 SM(d38:2) SM 1.5
## 15 SM(d39:1) SM 1.4
## 16 SM(d33:1) SM 1.4

```

```

##
##
## Table: List of lipids in the class TG
## and the lipid's respective proportion of observed signal within the class.
## Shown are each lipid's rank (Rank),
## name (Name),
## class (Class) and
## proportion of the lipid in its class (Pcnt.of.Class; %).

```

```

##

```

| ## | Rank  | Name               | Class | Pcnt.of.Class |
|----|-------|--------------------|-------|---------------|
| ## | ----- | -----              | ----- | -----         |
| ## | 1     | TG(18:1/18:1/16:0) | TG    | 12            |
| ## | 2     | TG(18:2/18:1/16:0) | TG    | 11            |
| ## | 3     | TG(16:0/18:2/18:2) | TG    | 7.4           |
| ## | 4     | TG(18:1/18:1/18:1) | TG    | 6.6           |
| ## | 5     | TG(14:0/18:1/18:1) | TG    | 6.4           |
| ## | 6     | TG(50:1)           | TG    | 6.1           |
| ## | 7     | TG(18:2/18:1/18:1) | TG    | 5.6           |
| ## | 8     | TG(50:3)           | TG    | 3.6           |
| ## | 9     | TG(18:1/18:2/18:2) | TG    | 3.5           |
| ## | 10    | TG(16:0/18:0/18:1) | TG    | 2.9           |
| ## | 11    | TG(54:2)           | TG    | 2.8           |
| ## | 12    | TG(14:0/16:0/18:1) | TG    | 2.6           |
| ## | 13    | TG(18:1/12:0/18:1) | TG    | 2             |
| ## | 14    | TG(45:0)           | TG    | 1.9           |
| ## | 15    | TG(16:0/22:5/18:1) | TG    | 1.8           |
| ## | 16    | TG(18:2/22:5/16:0) | TG    | 1.6           |
| ## | 17    | TG(16:0/18:2/18:3) | TG    | 1.6           |
| ## | 18    | TG(52:2)           | TG    | 1.5           |
| ## | 19    | TG(18:2/18:2/18:2) | TG    | 1.4           |
| ## | 20    | TG(52:3)           | TG    | 1.3           |
| ## | 21    | TG(51:2)           | TG    | 1             |
| ## | 22    | TG(14:0/18:2/18:2) | TG    | 0.95          |
| ## | 23    | TG(16:0/18:2/22:6) | TG    | 0.94          |
| ## | 24    | TG(52:4)           | TG    | 0.89          |
| ## | 25    | TG(46:1)           | TG    | 0.83          |
| ## | 26    | TG(54:3)           | TG    | 0.75          |
| ## | 27    | TG(48:3)           | TG    | 0.65          |
| ## | 28    | TG(18:0/18:1/20:4) | TG    | 0.63          |
| ## | 29    | TG(54:4)           | TG    | 0.62          |
| ## | 30    | TG(50:0)           | TG    | 0.61          |
| ## | 31    | TG(50:2)           | TG    | 0.61          |
| ## | 32    | TG(49:1)           | TG    | 0.56          |
| ## | 33    | TG(51:3)           | TG    | 0.56          |
| ## | 34    | TG(18:1/18:1/22:6) | TG    | 0.53          |
| ## | 35    | TG(53:2)           | TG    | 0.51          |
| ## | 36    | TG(53:3)           | TG    | 0.51          |
| ## | 37    | TG(51:1)           | TG    | 0.43          |
| ## | 38    | TG(46:0)           | TG    | 0.42          |
| ## | 39    | TG(46:2)           | TG    | 0.41          |
| ## | 40    | TG(54:5)           | TG    | 0.4           |
| ## | 41    | TG(49:2)           | TG    | 0.4           |
| ## | 42    | TG(49:3)           | TG    | 0.38          |
| ## | 43    | TG(56:5)           | TG    | 0.35          |
| ## | 44    | TG(58:9)           | TG    | 0.32          |
| ## | 45    | TG(52:5)           | TG    | 0.31          |
| ## | 46    | TG(53:4)           | TG    | 0.27          |
| ## | 47    | TG(56:4)           | TG    | 0.25          |
| ## | 48    | TG(54:6)           | TG    | 0.23          |
| ## | 49    | TG(56:3)           | TG    | 0.23          |
| ## | 50    | TG(56:6)           | TG    | 0.22          |
| ## | 51    | TG(47:1)           | TG    | 0.21          |
| ## | 52    | TG(56:7)           | TG    | 0.2           |

## 9 Quality Control Table of Lipid Measurements

Table 11: Coefficient of variation (CV; %; also called relative standard deviation) of the lipidomic features in quality control samples and study samples. Values are shown for pooled samples from the study (Pool.Study), NIST samples (NIST), long-term quality control samples from the clinic of Steno Diabetes Center Copenhagen (Pool.Clinic), and study samples (Sample). Additionally, the ratio of CVs in the study samples and in the pooled samples from the study are shown (Ratio.Sample.v.Pool). The rows of the table are sorted by this ratio.

| Name               | Pool.Study | NIST  | Pool.Clinic | Sample | Ratio.Sample.v.Pool |
|--------------------|------------|-------|-------------|--------|---------------------|
| PC(35:1)           | 4.58       | 21.11 | 13.10       | 31.49  | 6.87                |
| SM(d36:1)          | 2.46       | 8.29  | 8.25        | 15.88  | 6.45                |
| SM(d32:1)          | 4.60       | 14.49 | 8.78        | 25.76  | 5.60                |
| SM(d38:1)          | 4.49       | 11.35 | 11.33       | 23.28  | 5.18                |
| PC(33:1)           | 5.60       | 19.09 | 13.81       | 28.57  | 5.10                |
| PC(36:5)           | 8.85       | 39.53 | 14.10       | 44.70  | 5.05                |
| SM(d33:1)          | 4.96       | 16.28 | 8.29        | 24.68  | 4.97                |
| PC(40:6)           | 5.81       | 18.49 | 11.81       | 28.71  | 4.94                |
| PC(38:6)           | 5.35       | 18.32 | 8.66        | 26.04  | 4.87                |
| TG(18:2/22:5/16:0) | 9.52       | 52.28 | 13.35       | 45.18  | 4.75                |
| SM(d41:2)          | 5.52       | 19.20 | 12.13       | 25.25  | 4.57                |
| SM(d38:2)          | 3.98       | 8.20  | 9.05        | 18.00  | 4.52                |
| PC(40:7)           | 5.98       | 25.03 | 14.38       | 26.59  | 4.44                |
| SM(d40:2)          | 4.30       | 12.55 | 10.57       | 18.94  | 4.41                |
| SM(d39:1)          | 6.26       | 18.70 | 12.79       | 26.75  | 4.28                |
| SM(42:2)           | 5.23       | 16.82 | 9.95        | 21.87  | 4.18                |
| TG(53:2)           | 8.85       | 25.11 | 14.95       | 36.78  | 4.16                |
| TG(56:3)           | 8.19       | 24.92 | 16.42       | 33.19  | 4.05                |
| SM(d18:2/24:1)     | 4.62       | 14.21 | 10.41       | 18.53  | 4.01                |
| TG(54:2)           | 8.43       | 23.04 | 15.61       | 32.55  | 3.86                |
| SM(d16:1/18:1)     | 3.59       | 13.45 | 9.34        | 13.76  | 3.83                |
| TG(16:0/18:0/18:1) | 7.96       | 25.73 | 15.81       | 30.28  | 3.80                |
| TG(18:1/18:1/22:6) | 13.71      | 66.72 | 19.28       | 49.94  | 3.64                |
| TG(51:2)           | 9.02       | 25.03 | 14.04       | 30.22  | 3.35                |
| TG(53:3)           | 8.08       | 22.50 | 14.99       | 26.78  | 3.31                |
| PC(34:2)           | 4.12       | 12.86 | 17.26       | 13.66  | 3.31                |
| PC(38:2)           | 5.92       | 18.78 | 13.49       | 19.50  | 3.29                |
| PC(O-38:4)         | 5.36       | 17.02 | 18.24       | 16.83  | 3.14                |
| TG(51:1)           | 10.96      | 22.86 | 15.11       | 32.90  | 3.00                |
| TG(58:9)           | 14.28      | 39.16 | 22.76       | 42.32  | 2.96                |
| TG(54:3)           | 5.81       | 12.24 | 8.64        | 17.04  | 2.93                |
| PC(40:5)           | 6.92       | 17.63 | 14.21       | 20.13  | 2.91                |
| TG(50:1)           | 7.94       | 16.60 | 13.24       | 22.98  | 2.89                |
| TG(14:0/16:0/18:1) | 8.72       | 18.91 | 13.83       | 25.00  | 2.87                |
| SM(d40:1)          | 5.39       | 13.27 | 12.51       | 14.66  | 2.72                |
| TG(46:1)           | 10.56      | 28.58 | 15.34       | 27.81  | 2.63                |
| TG(18:1/18:1/18:1) | 8.59       | 16.34 | 12.97       | 22.40  | 2.61                |
| TG(49:1)           | 11.22      | 32.01 | 15.46       | 29.26  | 2.61                |
| SM(d41:1)          | 7.17       | 17.41 | 13.91       | 18.49  | 2.58                |
| PC(37:2)           | 11.27      | 30.48 | 17.21       | 28.68  | 2.54                |

| Name               | Pool.Study | NIST  | Pool.Clinic | Sample | Ratio.Sample.v.Pool |
|--------------------|------------|-------|-------------|--------|---------------------|
| TG(51:3)           | 9.13       | 24.67 | 15.63       | 23.12  | 2.53                |
| PC(O-36:2)         | 6.98       | 18.49 | 14.84       | 17.32  | 2.48                |
| TG(18:1/12:0/18:1) | 9.46       | 22.90 | 14.15       | 23.42  | 2.48                |
| TG(46:2)           | 11.11      | 25.71 | 18.43       | 27.42  | 2.47                |
| TG(53:4)           | 8.52       | 19.69 | 17.40       | 20.76  | 2.44                |
| TG(50:3)           | 6.00       | 17.88 | 11.92       | 14.38  | 2.40                |
| TG(56:5)           | 11.32      | 22.83 | 15.72       | 27.03  | 2.39                |
| TG(16:0/18:2/22:6) | 22.15      | 55.17 | 23.12       | 52.39  | 2.37                |
| PC(38:3)           | 4.94       | 13.44 | 11.56       | 11.65  | 2.36                |
| PC(32:1)           | 6.60       | 10.31 | 14.00       | 15.42  | 2.34                |
| TG(49:2)           | 9.96       | 24.15 | 15.98       | 22.42  | 2.25                |
| TG(50:0)           | 14.25      | 29.08 | 24.34       | 31.64  | 2.22                |
| PC(32:2)           | 8.10       | 23.93 | 14.89       | 17.94  | 2.22                |
| TG(14:0/18:1/18:1) | 7.11       | 15.29 | 10.51       | 15.67  | 2.20                |
| PC(16:0e/18:1(9Z)) | 7.98       | 18.64 | 10.33       | 17.56  | 2.20                |
| PC(34:1)           | 3.81       | 5.23  | 6.74        | 8.36   | 2.19                |
| TG(52:2)           | 6.20       | 8.49  | 7.91        | 13.39  | 2.16                |
| TG(56:7)           | 10.32      | 15.38 | 13.93       | 22.21  | 2.15                |
| SM(d18:1/24:0)     | 7.42       | 17.68 | 14.58       | 15.88  | 2.14                |
| TG(56:4)           | 14.65      | 18.86 | 17.96       | 30.45  | 2.08                |
| TG(56:6)           | 10.49      | 13.29 | 12.89       | 21.69  | 2.07                |
| TG(45:0)           | 4.35       | 5.83  | 7.68        | 8.93   | 2.05                |
| PC(O-36:3)         | 10.22      | 21.62 | 13.02       | 20.89  | 2.04                |
| PC(O-38:5)         | 6.62       | 16.21 | 11.95       | 13.42  | 2.03                |
| TG(18:0/18:1/20:4) | 17.37      | 20.86 | 24.04       | 35.02  | 2.02                |
| TG(48:3)           | 14.00      | 31.86 | 23.28       | 28.16  | 2.01                |
| TG(50:2)           | 6.64       | 11.62 | 8.90        | 13.15  | 1.98                |
| TG(52:4)           | 5.77       | 9.58  | 9.03        | 11.30  | 1.96                |
| TG(16:0/18:2/18:3) | 10.31      | 25.12 | 17.29       | 19.53  | 1.89                |
| TG(14:0/18:2/18:2) | 9.76       | 23.95 | 16.77       | 18.11  | 1.86                |
| PC(38:5)           | 4.66       | 9.84  | 8.25        | 8.41   | 1.81                |
| PC(O-38:6)         | 6.84       | 13.50 | 10.21       | 12.33  | 1.80                |
| TG(46:0)           | 11.75      | 22.81 | 13.95       | 20.93  | 1.78                |
| PC(34:3)           | 21.13      | 37.19 | 24.31       | 37.18  | 1.76                |
| TG(18:2/18:2/18:2) | 15.81      | 26.85 | 16.17       | 27.46  | 1.74                |
| TG(18:1/18:2/18:2) | 8.62       | 18.14 | 15.07       | 14.70  | 1.71                |
| LPC(18:1)          | 10.23      | 3.46  | 7.96        | 17.13  | 1.67                |
| TG(54:6)           | 10.98      | 16.72 | 13.81       | 18.02  | 1.64                |
| SM(d34:1)          | 4.28       | 4.32  | 6.66        | 7.01   | 1.64                |
| TG(16:0/22:5/18:1) | 15.96      | 16.91 | 17.01       | 26.06  | 1.63                |
| PC(36:4)           | 7.56       | 6.28  | 14.96       | 12.35  | 1.63                |
| TG(54:4)           | 6.03       | 10.07 | 9.33        | 9.81   | 1.63                |
| TG(54:5)           | 7.22       | 11.02 | 9.98        | 11.74  | 1.63                |
| TG(16:0/18:2/18:2) | 7.35       | 13.21 | 14.55       | 11.91  | 1.62                |
| TG(52:5)           | 12.90      | 19.07 | 16.36       | 20.56  | 1.59                |
| PC(35:2)           | 16.03      | 20.39 | 24.54       | 25.13  | 1.57                |
| LPC(16:0)          | 5.91       | 4.49  | 6.12        | 9.24   | 1.56                |
| TG(49:3)           | 3.72       | 4.23  | 4.02        | 5.47   | 1.47                |
| PC(38:4)           | 5.25       | 7.04  | 8.01        | 7.59   | 1.45                |
| PC(O-36:5)         | 8.02       | 11.89 | 9.86        | 11.36  | 1.42                |
| PC(36:2)           | 4.30       | 5.16  | 6.61        | 5.81   | 1.35                |
| SM(d36:2)          | 5.59       | 6.27  | 8.14        | 7.51   | 1.34                |

| Name               | Pool.Study | NIST  | Pool.Clinic | Sample | Ratio.Sample.v.Pool |
|--------------------|------------|-------|-------------|--------|---------------------|
| LPC(18:0)          | 9.79       | 4.91  | 6.88        | 13.15  | 1.34                |
| PC(32:0)           | 6.15       | 5.42  | 6.95        | 7.97   | 1.30                |
| PC(O-36:4)         | 11.70      | 15.74 | 11.88       | 14.83  | 1.27                |
| TG(47:1)           | 23.48      | 32.44 | 28.18       | 28.16  | 1.20                |
| TG(52:3)           | 7.60       | 8.74  | 9.63        | 9.10   | 1.20                |
| LPC(16:1)          | 9.77       | 5.90  | 11.40       | 10.54  | 1.08                |
| PC(36:3)           | 10.12      | 9.17  | 11.57       | 10.82  | 1.07                |
| PC(O-34:3)         | 15.20      | 15.27 | 10.86       | 15.98  | 1.05                |
| LPC(20:4)          | 13.51      | 8.79  | 10.65       | 14.00  | 1.04                |
| TG(18:2/18:1/18:1) | 16.72      | 14.52 | 14.33       | 16.62  | 0.99                |
| PC(O-34:2)         | 26.89      | 18.12 | 12.97       | 23.00  | 0.86                |
| LPC(18:2)          | 10.68      | 6.03  | 9.06        | 9.01   | 0.84                |
| TG(18:1/18:1/16:0) | 31.60      | 13.28 | 22.78       | 25.92  | 0.82                |
| TG(18:2/18:1/16:0) | 33.75      | 19.63 | 24.84       | 26.83  | 0.79                |

## 10 Appendix

```
## R version 3.4.2 (2017-09-28)
## Platform: x86_64-w64-mingw32/x64 (64-bit)
## Running under: Windows 7 x64 (build 7601) Service Pack 1
##
## Matrix products: default
##
## locale:
## [1] LC_COLLATE=Danish_Denmark.1252 LC_CTYPE=Danish_Denmark.1252
## [3] LC_MONETARY=Danish_Denmark.1252 LC_NUMERIC=C
## [5] LC_TIME=Danish_Denmark.1252
##
## attached base packages:
## [1] stats      graphics  grDevices  utils      datasets  methods    base
##
## other attached packages:
## [1] stringr_1.2.0
##
## loaded via a namespace (and not attached):
## [1] Rcpp_0.12.13      lattice_0.20-35    tidyr_0.8.0
## [4] zoo_1.8-0         gtools_3.5.0      assertthat_0.2.0
## [7] digest_0.6.12    psych_1.7.8       R6_2.2.2
## [10] survminer_0.4.2  plyr_1.8.4        evaluate_0.14
## [13] ggplot2_3.2.0    highr_0.6         gplots_3.0.1
## [16] rlang_0.3.4      lazyeval_0.2.0    data.table_1.10.4-3
## [19] gdata_2.18.0     Matrix_1.2-11     rmarkdown_1.13
## [22] labeling_0.3     splines_3.4.2     readr_1.1.1
## [25] foreign_0.8-69   munsell_0.5.0     broom_0.4.3
## [28] compiler_3.4.2   xfun_0.7          pkgconfig_2.0.1
## [31] mnormt_1.5-5     htmltools_0.3.6   tidyselect_0.2.3
## [34] tibble_1.3.4     gridExtra_2.3     km.ci_0.5-2
## [37] withr_2.0.0      dplyr_0.7.4       ggpubr_0.1.6
## [40] bitops_1.0-6     grid_3.4.2        nlme_3.1-131
## [43] xtable_1.8-2     gtable_0.2.0      magrittr_1.5
## [46] KMSurv_0.1-5     scales_1.0.0      KernSmooth_2.23-15
## [49] stringi_1.1.5    reshape2_1.4.2    bindrcpp_0.2
## [52] limma_3.32.10    survMisc_0.5.4    cowplot_0.9.2
## [55] RColorBrewer_1.1-2 tools_3.4.2        cmprsk_2.2-7
## [58] forcats_0.2.0    glue_1.2.0        purrr_0.2.4
## [61] hms_0.4.0        dummies_1.5.6     parallel_3.4.2
## [64] survival_2.41-3  yaml_2.2.0        colorspace_1.3-2
## [67] caTools_1.17.1   corrplot_0.84     knitr_1.23
## [70] bindr_0.1        haven_1.1.0
```
